# Supplementary material for: The cation exchanger Letm1, circadian rhythms, and NAD(H) levels interconnect in diurnal zebrafish
Source: Life Sci Alliance. 2022 Jun 13;5(9):e202101194. doi: 10.26508/lsa.202101194 (PMC9191620; doi:10.26508/lsa.202101194)
Supplement: Supplementary file 2 [file LSA-2021-01194_TableS2.xlsx]

## Sheet: Sheet1
geneid	baseMean	log2FoldChange	lfcSE	stat	pvalue	padj	meanFilter	181445	181446	181447	181448	181452	181453	181454	181455
ENSDARG00000099710	579.583	3.03804	0.164638	18.4528	4.95057e-76	1.24131e-71	FALSE	130.963	70.8608	114.64	69.382	812.943	689.186	753.758	872.087
ENSDARG00000034933	530.394	1.88533	0.117784	16.0066	1.14856e-57	1.43996e-53	FALSE	202.32	169.247	160.687	217.778	617.259	686.156	722.364	735.871
ENSDARG00000043797	2586.58	-1.08401	0.0690543	-15.698	1.56197e-55	1.3055e-51	FALSE	4268.9	3955.54	3923.27	3751.69	1834.65	1934.46	1948.22	1778.05
ENSDARG00000071345	304.963	-2.44019	0.166291	-14.6742	9.4377e-49	5.91602e-45	FALSE	546.438	528.059	758.961	795.143	129.8	138.332	115.912	100.455
ENSDARG00000055754	331.745	-9.59471	0.657916	-14.5835	3.57757e-48	1.79408e-44	FALSE	1036.32	849.156	1022.43	1066.2	2.89857	1.01046	1.04574	0
ENSDARG00000103019	644.06	-3.31363	0.231931	-14.2871	2.63323e-46	1.10043e-42	FALSE	1534.55	2064.33	1668.14	1125.59	125.872	158.196	213.223	146
ENSDARG00000068621	136.202	-7.90884	0.563774	-14.0284	1.04489e-44	3.74281e-41	FALSE	417.645	393.844	407.537	406.676	3.57675	1.86722	0.964674	0
ENSDARG00000071029	121.897	-3.59576	0.27759	-12.9535	2.24551e-38	7.03798e-35	FALSE	315.268	417.74	261.949	283.808	12.3397	29.7677	35.2983	31.1526
ENSDARG00000103841	134.764	3.39141	0.267261	12.6895	6.76023e-37	1.8834e-33	FALSE	26.1769	19.3303	14.6816	21.6141	286.417	200.116	167.154	191.8
ENSDARG00000092272	115.75	3.20087	0.256957	12.4568	1.28371e-35	3.21879e-32	FALSE	12.0244	17.3967	29.0263	15.7237	161.952	152.1	180.367	202.635
ENSDARG00000056510	856.8	-1.10487	0.0900363	-12.2714	1.2903e-34	2.94118e-31	FALSE	1319.8	1265.69	1380.83	1475.08	603.967	631.427	618.609	678.852
ENSDARG00000094215	209.164	-2.77681	0.231937	-11.9723	4.96492e-33	1.03742e-29	FALSE	404.603	528.735	500.823	495.361	47.3835	61.6544	103.39	70.094
ENSDARG00000091847	307.133	-12.2483	1.02703	-11.9259	8.67201e-33	1.67263e-29	FALSE	834.579	905.381	979.506	966.132	0	0	0	0
ENSDARG00000105187	768.179	-1.17699	0.100118	-11.756	6.5753e-32	1.17764e-28	FALSE	1028.41	1040.58	1090.64	1113.23	453.63	506.037	479.899	451.191
ENSDARG00000090107	154.368	2.73291	0.234469	11.6558	2.14415e-31	3.58416e-28	FALSE	51.0203	34.3322	53.0792	25.2695	263.096	312.116	273.415	226.143
ENSDARG00000100876	423.71	1.68574	0.146533	11.5042	1.25709e-30	1.97001e-27	FALSE	145.558	165.322	165.68	220.82	604.805	558.785	526.035	567.849
ENSDARG00000008491	1091.41	-1.1004	0.0962458	-11.4332	2.85465e-30	4.21044e-27	FALSE	1497.11	1573.36	1697.99	1607.62	767.522	770.554	693.313	743.957
ENSDARG00000041645	710.035	-1.90283	0.173393	-10.9741	5.09153e-28	7.0925e-25	FALSE	920.944	831.063	1092.16	1001.83	246.567	238.497	201.728	342.862
ENSDARG00000025074	472.949	-1.07695	0.0996471	-10.8077	3.1666e-27	4.17891e-24	FALSE	700.119	736.093	799.199	721.274	328.54	376.884	320.998	376.956
ENSDARG00000068088	980.195	-1.91074	0.177383	-10.7719	4.67473e-27	5.86071e-24	FALSE	1360.47	1736.41	1356.5	1305.53	367.435	335.17	530.489	298.723
ENSDARG00000103006	253.641	2.21827	0.206507	10.7419	6.47273e-27	7.72844e-24	FALSE	95.2889	81.3514	64.5466	72.5613	359.847	365.119	354.282	370.213
ENSDARG00000041787	420.097	-1.2385	0.115376	-10.7345	7.00982e-27	7.98929e-24	FALSE	604.657	625.458	616.195	709.368	229.592	318.831	280.049	256.281
ENSDARG00000104890	928.5	1.04032	0.101879	10.2113	1.76432e-24	1.92341e-21	FALSE	468.83	482.332	571.696	569.261	1164.15	1031.18	1051.32	1064.48
ENSDARG00000071644	372.717	2.0028	0.196519	10.1914	2.16671e-24	2.26367e-21	FALSE	126.702	141.674	153.08	78.4503	599.435	424.337	545.19	428.991
ENSDARG00000054300	1089.37	-0.787329	0.0773562	-10.178	2.4871e-24	2.49446e-21	FALSE	1490.42	1471.54	1604.9	1436.87	871.482	872.748	845.419	889.251
ENSDARG00000060671	229.41	-2.21632	0.218147	-10.1597	2.99902e-24	2.89221e-21	FALSE	442.066	443.537	505.96	469.174	116.13	83.8888	79.3914	121.25
ENSDARG00000077090	53.2457	-3.05254	0.301775	-10.1153	4.72573e-24	4.38863e-21	FALSE	115.206	125.507	168.206	138.129	12.5198	13.1298	22.0091	18.7558
ENSDARG00000040553	115.023	5.44334	0.540829	10.0648	7.90461e-24	7.07858e-21	FALSE	0	3.01573	5.59632	3.40751	142.577	43.7419	177.926	200.436
ENSDARG00000037000	542.233	-1.27495	0.126883	-10.0482	9.35238e-24	8.08626e-21	FALSE	774.89	1000.45	993.737	879.095	369.573	423.329	360.908	355.65
ENSDARG00000102713	569.586	1.16034	0.116299	9.97722	1.91761e-23	1.60274e-20	FALSE	247.486	295.2	338.315	302.88	707.999	661.826	586.794	701.3
ENSDARG00000021208	226.776	-1.25297	0.126108	-9.93567	2.91213e-23	2.31903e-20	FALSE	340.538	402.127	372.288	399.228	147.799	158.649	157.506	173.264
ENSDARG00000070775	377.262	-1.62076	0.163152	-9.93406	2.95959e-23	2.31903e-20	FALSE	545.054	622.73	748.345	566.174	217.861	204.92	211.151	173.327
ENSDARG00000102175	311.118	-2.11791	0.213642	-9.91338	3.64116e-23	2.76662e-20	FALSE	420.765	475.738	397.957	433.245	110.524	66.5083	142.066	79.0724
ENSDARG00000043729	1974.63	-1.72836	0.174445	-9.90782	3.84969e-23	2.83903e-20	FALSE	2771.52	3688.91	3907.58	3683.9	1015.17	1011.8	1148.55	1066.57
ENSDARG00000034344	2407.39	1.11834	0.112927	9.9032	4.03154e-23	2.88819e-20	FALSE	1012.56	1517.2	1202.75	1463.04	2822.67	2963.06	2770.74	2739.55
ENSDARG00000039726	286.286	1.17627	0.119796	9.81891	9.33454e-23	6.5015e-20	FALSE	157.566	168.825	163.281	152.188	388.096	349.639	337.286	374.956
ENSDARG00000051925	459.63	-1.23321	0.125727	-9.80863	1.03367e-22	7.00492e-20	FALSE	648.956	613.531	610.894	633.594	244.656	277.422	281.291	262.957
ENSDARG00000097670	89.4089	4.41424	0.450294	9.80301	1.09279e-22	7.2107e-20	FALSE	12.082	8.60427	6.44735	2.93339	155.825	160.876	110.578	183.997
ENSDARG00000100000	413.204	2.19209	0.223983	9.78686	1.28217e-22	8.24339e-20	FALSE	106.569	124.381	183.31	104.824	715.228	471.534	656.881	534.168
ENSDARG00000103249	76.4406	-3.56852	0.366117	-9.74695	1.90095e-22	1.19161e-19	FALSE	126.518	215.857	172.257	218.838	6.77368	19.2032	25.0724	11.0229
ENSDARG00000068883	556.302	-1.5783	0.16253	-9.71085	2.71076e-22	1.6578e-19	FALSE	900.839	997.373	994.733	844.386	198.121	303.152	386.862	364.945
ENSDARG00000104600	846.593	1.56247	0.161686	9.66356	4.30628e-22	2.57085e-19	FALSE	307.641	384.715	324.248	376.125	1083.91	925.003	1113.94	996.637
ENSDARG00000100276	108.233	2.77604	0.288169	9.63339	5.77888e-22	3.36976e-19	FALSE	24.4648	44.4248	13.8777	13.3541	116.608	139.567	157.51	178.466
ENSDARG00000036237	1244.98	-1.29934	0.13517	-9.6126	7.07416e-22	4.03131e-19	FALSE	2023.18	1918.83	2029.87	1876.23	726.825	757.091	708.02	999.053
ENSDARG00000020994	162.652	-2.32329	0.243007	-9.56058	1.17101e-21	6.52486e-19	FALSE	257.934	364.827	346.781	393.371	79.0684	75.7625	47.1232	70.5936
ENSDARG00000043279	323.27	-1.83963	0.192803	-9.54151	1.40773e-21	7.67337e-19	FALSE	624.586	775.464	535.731	737.013	183.009	202.501	171.289	190.146
ENSDARG00000016081	1239.02	-1.1506	0.120682	-9.53415	1.51116e-21	8.06185e-19	FALSE	1836.23	1902.52	1920.74	1624.73	750.138	779.96	806.033	945.748
ENSDARG00000097653	30.2938	-5.4262	0.569355	-9.53043	1.56638e-21	8.18237e-19	FALSE	94.479	75.801	88.8676	81.0014	1.63952	1.71976	1.78496	2.81819
ENSDARG00000102326	1379.15	0.937368	0.0987111	9.49608	2.17945e-21	1.11525e-18	FALSE	797.253	878.117	851.836	925.41	1905.83	1446.07	1606.98	1662.1
ENSDARG00000062397	1514.88	0.621825	0.0657206	9.46165	3.0313e-21	1.52014e-18	FALSE	1200.64	1163.27	1161.76	1224.26	1900.08	1772.97	1835.56	1799.77
ENSDARG00000059483	1789.42	0.554563	0.0590626	9.38941	6.03371e-21	2.96645e-18	FALSE	1373.79	1433.35	1274.62	1370.05	2053.68	1984.22	1966.64	1996.86
ENSDARG00000056762	439.968	-1.55827	0.166758	-9.34452	9.23109e-21	4.45116e-18	FALSE	577.848	724.222	704.352	611.098	200.204	253.301	229.306	206.52
ENSDARG00000088366	1045.95	-1.17256	0.125741	-9.32523	1.10738e-20	5.23897e-18	FALSE	1514.43	1616.23	1539.96	1510.97	695.564	625.687	673.806	747.862
ENSDARG00000104174	66.4989	5.12933	0.550779	9.31286	1.24434e-20	5.77788e-18	FALSE	4.3695	1.07394	0	5.41115	73.4387	96.0335	100.462	103.699
ENSDARG00000038703	429.653	-1.08328	0.116404	-9.30627	1.32397e-20	6.03587e-18	FALSE	646.514	771.746	621.953	597.76	292.559	293.006	348.396	310.975
ENSDARG00000045516	907.028	-1.38043	0.14869	-9.28398	1.63264e-20	7.31016e-18	FALSE	1442.65	1449.72	1654.82	1725.01	547.971	605.396	581.386	676.021
ENSDARG00000010267	1081.81	-0.996439	0.107679	-9.25378	2.16682e-20	9.53173e-18	FALSE	1304.48	1563.9	1588.83	1618.9	756.997	730.54	723.667	838.051
ENSDARG00000022261	1789.49	-1.55318	0.167928	-9.24907	2.26455e-20	9.78987e-18	FALSE	2328.73	2382.56	2873.83	2887.86	910.221	863.552	816.356	979.687
ENSDARG00000104929	620.971	1.09396	0.118707	9.21566	3.09382e-20	1.31482e-17	FALSE	246.087	240.431	243.295	277.696	513.654	563.783	568.116	508.37
ENSDARG00000044441	865.515	-0.968384	0.105203	-9.20492	3.41919e-20	1.42888e-17	FALSE	1120.75	1309.32	1311.5	1238.72	673.975	580.2	626.51	666.797
ENSDARG00000090946	58.1211	-2.44797	0.26738	-9.15541	5.41543e-20	2.22601e-17	FALSE	96.2003	124.95	138.133	137.341	30.2305	18.5609	23.0072	19.0456
ENSDARG00000034273	869.662	-1.30251	0.142381	-9.14809	5.79474e-20	2.34351e-17	FALSE	1146.25	1222.25	1481.88	1481.39	530.443	540.162	530.054	562.904
ENSDARG00000103760	440.412	-1.43298	0.156697	-9.14492	5.96731e-20	2.37499e-17	FALSE	654.638	670.502	788.585	828.614	268.795	251.499	331.101	239.395
ENSDARG00000051940	651.448	-1.06504	0.116546	-9.13833	6.34236e-20	2.48482e-17	FALSE	990.769	858.069	927.281	910.609	407.128	381.113	462.567	511.694
ENSDARG00000095863	1946.52	-1.96625	0.215294	-9.13286	6.67125e-20	2.57346e-17	FALSE	3133.79	2456.87	3480.15	3628.73	688.74	781.8	934.433	845.778
ENSDARG00000098911	160.264	1.55973	0.171158	9.11281	8.02749e-20	3.04972e-17	FALSE	71.7637	66.392	77.3203	62.5305	173.049	204.8	227.499	213.222
ENSDARG00000104256	654.53	-2.04635	0.226341	-9.04103	1.55206e-19	5.80843e-17	FALSE	1010.6	1192.16	1510.87	1310.74	317.035	274.614	288.691	336.654
ENSDARG00000079932	1554.58	-0.574	0.0635711	-9.02926	1.7283e-19	6.37285e-17	FALSE	1823.06	1988.17	1845.91	1972.43	1224.75	1313.5	1314.67	1275.58
ENSDARG00000103844	209.896	-1.97895	0.219362	-9.02139	1.85722e-19	6.74897e-17	FALSE	476.095	225.66	402.571	447.715	87.4679	99.9532	103.272	103.043
ENSDARG00000045089	224.174	-1.94842	0.216027	-9.01934	1.89232e-19	6.77828e-17	FALSE	377.189	414.528	456.386	496.245	123.819	151.145	118.931	57.4994
ENSDARG00000041797	532.789	-1.25486	0.139288	-9.00909	2.07779e-19	7.33782e-17	FALSE	698.236	800.376	837.444	877.199	336.35	337.37	323.691	350.796
ENSDARG00000039393	344.074	-1.72287	0.193333	-8.91137	5.04051e-19	1.75536e-16	FALSE	576.905	710.361	628.126	661.094	159.039	281.305	167.911	172.47
ENSDARG00000030478	771.493	-0.915642	0.103111	-8.88014	6.67745e-19	2.29357e-16	FALSE	1017.19	1180.65	1141.78	1224.55	580.869	624.994	580.909	636.267
ENSDARG00000058159	1912.14	0.592341	0.0669701	8.84485	9.16479e-19	3.10538e-16	FALSE	1487.05	1403.49	1452.15	1372.91	2255.26	2187.2	2137.87	2028.5
ENSDARG00000097770	200.087	9.47285	1.07196	8.83697	9.83491e-19	3.28801e-16	FALSE	0	1.07469	0	0	292.12	77.9194	304.781	257.651
ENSDARG00000092945	278.025	-1.2708	0.144637	-8.78616	1.54758e-18	5.10579e-16	FALSE	420.226	499.453	463.45	471.199	174.053	211.275	217.187	166.643
ENSDARG00000093819	39.5373	-9.29521	1.05941	-8.77399	1.72448e-18	5.61554e-16	FALSE	88.4622	116.158	129.098	140.729	0	0	0	0
ENSDARG00000008637	1496.53	-0.957467	0.110006	-8.70377	3.21043e-18	1.03203e-15	FALSE	1983.63	2360.31	2297.88	2157.81	1114.79	1106.58	1185.39	1126.22
ENSDARG00000021184	3182.35	0.744548	0.0856149	8.69647	3.42355e-18	1.0779e-15	FALSE	1980.12	2204.13	1871.62	1939.15	3343.07	3620.96	3286.47	3141.21
ENSDARG00000097247	1023.06	3.07995	0.354181	8.69596	3.43909e-18	1.0779e-15	FALSE	146.281	141.659	86.1614	101.355	1150.84	451.104	1216.91	1185.28
ENSDARG00000076073	332.282	-1.74787	0.201444	-8.67672	4.0734e-18	1.26094e-15	FALSE	462.866	624.112	611.986	677.741	129.459	192.087	200.856	187.462
ENSDARG00000035309	104.817	-2.87705	0.332368	-8.65622	4.87674e-18	1.49121e-15	FALSE	376.408	151.225	182.12	344.102	46.1926	36.3553	25.1659	35.3099
ENSDARG00000018846	376.204	-1.93476	0.223704	-8.64873	5.20754e-18	1.57318e-15	FALSE	602.065	719.892	786.418	751.796	177.312	196.964	156.095	218.424
ENSDARG00000018361	228.427	-2.18704	0.253051	-8.64269	5.49067e-18	1.63896e-15	FALSE	301.5	283.459	497.974	403.657	82.0309	68.1051	70.1489	107.037
ENSDARG00000045834	127	-2.68656	0.312225	-8.60456	7.66131e-18	2.25999e-15	FALSE	168.93	283.144	323.176	376.68	41.6069	37.8352	58.385	41.6683
ENSDARG00000060879	174.927	-2.12338	0.247161	-8.59108	8.61576e-18	2.512e-15	FALSE	287.732	340.461	423.243	330.889	68.0099	93.099	68.5892	88.0221
ENSDARG00000036239	8198.04	-0.81854	0.0954098	-8.5792	9.55314e-18	2.75328e-15	FALSE	11205.3	11296.8	10463.2	11446.5	6168.46	6920.81	6104.63	5987.34
ENSDARG00000104721	72.5817	-1.97607	0.230964	-8.55575	1.17105e-17	3.3367e-15	FALSE	135.871	152.887	137.384	128.939	22.1139	34.2377	38.3235	47.5511
ENSDARG00000057035	1196.36	-1.19516	0.140076	-8.53219	1.43602e-17	4.00076e-15	FALSE	1419.12	1804.69	1769.67	1618.16	622.302	688.878	889.956	688.492
ENSDARG00000093640	273.282	-1.9625	0.23001	-8.53224	1.43536e-17	4.00076e-15	FALSE	422.607	412.892	552.802	607.94	135.763	128.091	86.1149	163.096
ENSDARG00000071021	1454.89	-1.27853	0.149964	-8.52556	1.52069e-17	4.19009e-15	FALSE	2046.95	2327.61	2281.09	1890.67	871.072	842.53	891.952	917.647
ENSDARG00000062501	649.312	-0.932227	0.109659	-8.50116	1.87699e-17	5.1156e-15	FALSE	878.306	914.39	1044.36	944.231	516.293	587.988	410.27	467.611
ENSDARG00000074809	298.802	-1.32126	0.155708	-8.48553	2.14736e-17	5.78955e-15	FALSE	418.761	481.927	539.016	477.482	165.471	189.68	240.068	173.436
ENSDARG00000101189	93.8873	3.28255	0.38841	8.45124	2.88222e-17	7.68817e-15	FALSE	14.5389	17.1843	3.91324	19.8082	133.593	135.441	138.904	131.162
ENSDARG00000006427	10597.4	-1.59772	0.189093	-8.44943	2.92733e-17	7.7263e-15	FALSE	14583.7	17199.4	20571.1	18834.9	5084.71	5829.92	6004.72	6602.87
ENSDARG00000052207	790.624	-1.58074	0.187169	-8.4455	3.02734e-17	7.90703e-15	FALSE	960.991	1148.08	1177.66	1155.49	356.701	336.272	415.481	377.501
ENSDARG00000019541	2729.54	-0.711704	0.0843048	-8.44204	3.11854e-17	8.06128e-15	FALSE	3259.72	3530.97	3715.38	3729.28	2382.62	2134.99	1992.35	2188.58
ENSDARG00000098162	809.67	-1.04006	0.123562	-8.41727	3.85343e-17	9.85929e-15	FALSE	1159.35	1394.17	1314.2	1064.97	530.301	578.347	716.843	574.164
ENSDARG00000087143	215.953	-1.77146	0.210653	-8.40936	4.12271e-17	1.03373e-14	FALSE	264.514	218.808	346.313	338.978	92.0864	80.8258	69.4868	100.605
ENSDARG00000102728	96.8895	3.60557	0.428741	8.40968	4.11146e-17	1.03373e-14	FALSE	8.62646	11.8842	6.23096	17.7001	90.6052	137.168	168.33	142.165
ENSDARG00000103298	173.645	-1.52842	0.181906	-8.40227	4.37948e-17	1.08724e-14	FALSE	244.399	310.639	300.942	348.67	120.619	108.979	95.7614	92.7794
ENSDARG00000040190	1779.8	-0.861047	0.102565	-8.39511	4.65466e-17	1.14423e-14	FALSE	2276.67	2366.58	2860.66	2688.12	1409.06	1366.34	1415.07	1424.32
ENSDARG00000002293	84.2746	8.76441	1.04981	8.34857	6.90942e-17	1.68201e-14	FALSE	0	0	0	0.906585	110.474	151.683	148.496	161.516
ENSDARG00000092155	4108.8	-1.22813	0.147163	-8.3454	7.09729e-17	1.71113e-14	FALSE	5155.88	5245.75	6669.87	5984.97	2102.2	2618.59	2359.03	2764.38
ENSDARG00000099685	1076.15	0.584691	0.0703448	8.31178	9.428e-17	2.25141e-14	FALSE	790.921	827.311	757.687	789.918	1229.09	1114.2	1190.42	1213.44
ENSDARG00000086048	66.7493	2.60255	0.313252	8.30818	9.71784e-17	2.29873e-14	FALSE	16.0393	13.9459	14.7515	12.6378	75.1354	58.5808	113.173	99.2911
ENSDARG00000100592	337.129	1.27287	0.153524	8.29104	1.12267e-16	2.63083e-14	FALSE	173.248	224.348	186.334	199.224	527.336	516.32	393.308	458.719
ENSDARG00000103624	3089.71	1.0009	0.120786	8.28655	1.16578e-16	2.70655e-14	FALSE	1316.8	1594.05	1599.67	1877.05	3272.72	3613.3	2929.78	2981.09
ENSDARG00000098136	349.363	1.6216	0.195961	8.27511	1.28337e-16	2.95223e-14	FALSE	104.7	123.923	145.777	133.478	412.746	273.173	434.259	449.644
ENSDARG00000007034	1982.01	0.767274	0.0928374	8.2647	1.40044e-16	3.19224e-14	FALSE	1463.32	1407.24	1439.71	1466.33	2516.99	2390.7	2600.38	2323.34
ENSDARG00000053625	1259.53	-1.15454	0.139729	-8.26268	1.42439e-16	3.21757e-14	FALSE	1908.08	2195.36	2016.33	2064.78	949.28	953.591	864.624	909.273
ENSDARG00000099243	1866.65	0.897962	0.108782	8.25466	1.52336e-16	3.41041e-14	FALSE	957.275	1021.13	1207.65	1228.82	2030.7	2202.08	2074.66	1931.47
ENSDARG00000021149	1692.4	-0.894222	0.108409	-8.24858	1.60294e-16	3.55683e-14	FALSE	2282.96	2308.52	2522.38	2296.76	1087.98	1215.32	1371.22	1391.12
ENSDARG00000091916	489.788	-1.23399	0.149876	-8.23337	1.82015e-16	3.97873e-14	FALSE	652.307	814.351	789.835	799.39	315.413	340.693	322.463	321.779
ENSDARG00000042010	860.705	-1.41524	0.171897	-8.23307	1.82481e-16	3.97873e-14	FALSE	1210.08	1507.36	1427.08	1329.8	567.589	503.938	405.997	575.566
ENSDARG00000092976	836.141	-1.24553	0.152195	-8.18382	2.74992e-16	5.94409e-14	FALSE	1254.98	1296.23	1453.36	1451.68	566.107	625.624	555.758	554.449
ENSDARG00000098589	2214.61	-0.713846	0.0873758	-8.16984	3.08805e-16	6.61793e-14	FALSE	2662.78	2976.58	3082.57	2962.88	1576.82	1832.78	1853.49	1866.11
ENSDARG00000004687	666.514	-0.621985	0.0764669	-8.13404	4.15227e-16	8.74908e-14	FALSE	901.101	921.978	938.928	830.761	553.336	599.703	579.506	601.569
ENSDARG00000098800	147.001	-1.65627	0.203605	-8.13472	4.12881e-16	8.74908e-14	FALSE	193.301	294.41	211.28	356.875	71.6282	83.0587	88.8034	93.2952
ENSDARG00000089874	109.25	2.18354	0.268751	8.12475	4.48286e-16	9.36693e-14	FALSE	32.032	50.4496	37.2727	31.5537	141.954	167.724	163.198	216.133
ENSDARG00000041595	296.497	-2.17759	0.268194	-8.11945	4.68308e-16	9.70442e-14	FALSE	457.184	614.261	548.497	707.903	137.342	171.626	78.7493	126.942
ENSDARG00000104829	181.749	-1.17485	0.144936	-8.10601	5.23078e-16	1.07505e-13	FALSE	237.416	274.792	309.614	273.773	104.958	120.494	123.41	138.867
ENSDARG00000006220	2533.1	-1.13093	0.140323	-8.05945	7.66392e-16	1.56232e-13	FALSE	3704.94	4035.03	4104.87	3754.98	1660.47	1741.49	1857.65	1864.52
ENSDARG00000077872	573.51	-2.53294	0.314435	-8.05556	7.91188e-16	1.59986e-13	FALSE	1143.73	1277.65	1469.71	1337.17	240.698	187.96	185.039	289.96
ENSDARG00000077058	62.6563	-2.61369	0.325665	-8.02572	1.00936e-15	2.0247e-13	FALSE	105.214	166.131	136.247	126.623	16.3151	30.2836	22.0611	18.768
ENSDARG00000088444	123.384	4.81678	0.600608	8.01984	1.05883e-15	2.10707e-13	FALSE	4.38843	8.57173	8.90178	2.71585	205.99	181.615	213.46	93.875
ENSDARG00000095522	26.4077	-8.70668	1.08623	-8.01551	1.09682e-15	2.16549e-13	FALSE	72.7177	113.588	73.9003	56.6872	0	0	0	0
ENSDARG00000030915	335.761	-2.22307	0.277519	-8.01051	1.14234e-15	2.23774e-13	FALSE	450.56	790.334	800.651	673.84	144.996	189.48	111.674	135.452
ENSDARG00000102004	3994.14	-1.08126	0.135035	-8.00724	1.17315e-15	2.28027e-13	FALSE	4983.14	5094.33	6361.63	5199.88	2168.14	2613	2682.16	2765.74
ENSDARG00000039265	284.869	1.43833	0.180014	7.9901	1.34831e-15	2.60058e-13	FALSE	110.165	133.797	163.172	127.608	359.951	390.85	319.43	385.206
ENSDARG00000037843	60.4404	8.90184	1.11666	7.97183	1.56336e-15	2.99234e-13	FALSE	0	0	0	0	66.4426	126.511	92.6205	95.1638
ENSDARG00000056314	1930.49	-1.31459	0.165565	-7.93999	2.02201e-15	3.84089e-13	FALSE	3110.34	3464.88	3467.14	3767.43	1229.02	1443.09	1417.21	1464
ENSDARG00000032639	1236.58	-1.45611	0.18342	-7.93869	2.04326e-15	3.85208e-13	FALSE	1694.97	1876.4	2309.3	2180.6	683.452	781.505	729.322	744.976
ENSDARG00000104007	218.082	1.59563	0.201168	7.93183	2.15947e-15	4.04078e-13	FALSE	88.7537	121.328	62.6962	86.4936	250.408	291.043	310.453	231.519
ENSDARG00000103785	1290.48	-1.04924	0.132795	-7.90115	2.7635e-15	5.13273e-13	FALSE	1742.02	1778.68	1832.58	1808.05	822.944	823.621	871.83	943.23
ENSDARG00000017794	1293.03	-0.687561	0.0871164	-7.89244	2.96332e-15	5.46341e-13	FALSE	1705.15	1676.89	1534.64	1686.55	999.816	1024.84	964.863	1109.84
ENSDARG00000042780	1406.45	-1.25269	0.158812	-7.88783	3.07491e-15	5.62777e-13	FALSE	2200.9	2180.95	2520.48	2431.11	883.096	1080.71	897.365	1056.75
ENSDARG00000019294	84.7108	-2.74287	0.348115	-7.87921	3.29457e-15	5.98608e-13	FALSE	223.986	131.408	206.729	286.538	35.8982	39.2981	11.6853	39.8029
ENSDARG00000099646	114.05	-2.57824	0.327379	-7.87542	3.39604e-15	6.12606e-13	FALSE	270.62	195.415	307.592	198.211	58.9785	14.148	35.5392	54.0208
ENSDARG00000096527	222.841	-3.54656	0.450957	-7.86453	3.70494e-15	6.63555e-13	FALSE	503.967	634.172	453.686	750.419	79.595	37.7803	36.3513	46.5964
ENSDARG00000036776	347.273	-1.02401	0.130383	-7.85384	4.03501e-15	7.12829e-13	FALSE	533.271	466.277	511.24	415.07	212.166	240.262	237.366	256.112
ENSDARG00000010936	1264.04	-1.69173	0.215404	-7.85378	4.03692e-15	7.12829e-13	FALSE	1916.84	2190.4	2535.28	2478.59	783.165	758.232	519.162	763.385
ENSDARG00000017984	106.033	3.08478	0.393123	7.84685	4.26601e-15	7.48014e-13	FALSE	20.948	15.3761	25.9675	15.9909	170.356	170.138	171.788	150.199
ENSDARG00000041540	246.048	-3.47299	0.442754	-7.84407	4.36174e-15	7.59488e-13	FALSE	450.137	434.063	633.001	559.915	39.3396	68.6405	53.5847	25.393
ENSDARG00000002968	389.779	-1.50803	0.192417	-7.83727	4.60441e-15	7.96214e-13	FALSE	596.088	740.349	715.326	708.322	277.648	219.2	258.689	215.098
ENSDARG00000002507	452.913	0.74936	0.0956462	7.83471	4.6991e-15	8.07023e-13	FALSE	308.346	339.337	299.575	299.93	515.631	534.637	492.133	553.378
ENSDARG00000103226	513.538	-0.995135	0.127375	-7.81265	5.59965e-15	9.55141e-13	FALSE	619.573	813.635	661.908	729.028	398.314	335.099	345.754	338.537
ENSDARG00000061383	834.434	-1.09538	0.140342	-7.8051	5.94526e-15	1.00724e-12	FALSE	1179.48	1225.4	1309.04	1454.73	574.326	697.373	604.402	543.941
ENSDARG00000099873	128.797	-1.23745	0.158709	-7.79694	6.34243e-15	1.06582e-12	FALSE	236.727	213.821	230.642	244.648	87.3671	87.6822	108.985	109.503
ENSDARG00000005616	126.846	-1.46555	0.18798	-7.79628	6.37604e-15	1.06582e-12	FALSE	210.805	239.962	248.488	269.951	101.239	72.3188	81.521	96.6625
ENSDARG00000079560	294.709	-1.04723	0.134437	-7.78974	6.71482e-15	1.11502e-12	FALSE	355.128	403.229	426.576	452.013	179.635	213.482	196.842	204.508
ENSDARG00000020944	3110.61	-0.848466	0.109054	-7.78024	7.23871e-15	1.1863e-12	FALSE	3622.29	4849.07	4219.12	3826.68	2207.09	2289.74	2366.9	2310.64
ENSDARG00000076487	335.75	-2.02363	0.260088	-7.78056	7.22055e-15	1.1863e-12	FALSE	639.976	709.11	682.291	696.59	197.151	198.183	112.239	163.308
ENSDARG00000038296	989.827	-1.15515	0.148649	-7.77099	7.78756e-15	1.26796e-12	FALSE	1157.98	1373.93	1517.58	1410.8	565.322	593.227	613.8	681.7
ENSDARG00000092890	154.838	-1.3372	0.172206	-7.76509	8.15862e-15	1.3198e-12	FALSE	210.269	266.48	273.878	262.559	92.7731	127.214	99.2874	82.5997
ENSDARG00000014311	145.993	-1.30061	0.16754	-7.763	8.2945e-15	1.33318e-12	FALSE	244.911	227.446	269.355	220.217	90.5811	109.088	114.192	76.1179
ENSDARG00000044212	4197.14	-1.15963	0.149717	-7.74548	9.52186e-15	1.52071e-12	FALSE	6213.25	6715.43	6655.75	7125.27	2329.43	3230.21	3537.3	2860.36
ENSDARG00000071377	596.282	-0.833685	0.107855	-7.72968	1.0782e-14	1.71105e-12	FALSE	778.02	800.391	828.524	755.738	387.207	447.097	494.194	447.23
ENSDARG00000099101	920.976	1.65525	0.214311	7.7236	1.13092e-14	1.78345e-12	FALSE	348.859	292.739	298.547	316.242	1437.5	803.755	713.437	998.764
ENSDARG00000097054	92.8636	3.93705	0.510425	7.71328	1.22624e-14	1.92167e-12	FALSE	1.47095	7.48252	14.9893	6.36922	81.6041	111.861	174.689	111.719
ENSDARG00000038583	1735.47	-0.451257	0.0585318	-7.70961	1.26206e-14	1.96552e-12	FALSE	1995.77	2054.17	2177.8	2159.2	1507.87	1550.3	1467.21	1616.11
ENSDARG00000090850	4187.34	-1.15677	0.150383	-7.69214	1.44693e-14	2.23953e-12	FALSE	6021.76	6567.13	7805.95	7457.79	3254.61	3330.22	2813.18	3095.57
ENSDARG00000101450	89.9072	-2.29162	0.298324	-7.68167	1.5703e-14	2.40414e-12	FALSE	200.757	238.657	163.759	169.814	33.216	42.2423	44.716	37.914
ENSDARG00000092131	40.8743	4.07798	0.530884	7.68149	1.57246e-14	2.40414e-12	FALSE	2.9431	2.13756	1.00013	8.19326	55.9371	61.4687	62.5028	70.7925
ENSDARG00000042982	529.385	-1.33708	0.174284	-7.67185	1.69532e-14	2.57095e-12	FALSE	802.992	825.6	879.241	820.583	288.354	306.944	361.007	362.008
ENSDARG00000100635	1065.48	-2.46127	0.320839	-7.67134	1.70207e-14	2.57095e-12	FALSE	1992.75	1931.59	2641.9	1865.49	327.389	384.624	362.336	457.022
ENSDARG00000005704	474.001	-0.807006	0.105423	-7.65492	1.93428e-14	2.88692e-12	FALSE	579.44	601.761	631.66	559.259	309.647	364.462	317.604	365.406
ENSDARG00000061375	2168.9	-1.12553	0.147027	-7.65524	1.92959e-14	2.88692e-12	FALSE	2717.61	2902.58	3086.9	3376.01	1272.96	1427.86	1264.15	1575.35
ENSDARG00000008553	253.724	-1.23719	0.16229	-7.62331	2.4725e-14	3.66837e-12	FALSE	362.353	424.025	372.792	385.218	131.623	151.075	170.138	203.938
ENSDARG00000100712	675.909	-0.919926	0.121014	-7.60181	2.92009e-14	4.30696e-12	FALSE	1045.73	1091.98	1047.21	930.705	476.861	536.045	562.338	600.575
ENSDARG00000021494	391.452	-0.855118	0.112571	-7.59623	3.04875e-14	4.47043e-12	FALSE	505.996	505.885	555.635	549.82	266.653	275.331	295.162	336.709
ENSDARG00000100731	1456.46	-0.589348	0.077795	-7.57565	3.57332e-14	5.20915e-12	FALSE	1695.81	1907.83	1901.88	1900.2	1154.41	1277.5	1198.64	1297.37
ENSDARG00000100710	316.514	-0.749374	0.0995914	-7.52449	5.29271e-14	7.67107e-12	FALSE	479.3	447.698	437.602	466.588	265.487	255.092	276.923	291.549
ENSDARG00000070918	168.331	-2.39395	0.318443	-7.51766	5.5766e-14	8.03607e-12	FALSE	331.991	587.334	363.091	262.109	78.3008	59.2836	75.6887	80.8081
ENSDARG00000101074	19542.4	-0.668525	0.088978	-7.51338	5.76211e-14	8.25595e-12	FALSE	22128.3	22879	24927.8	24549.5	14236.3	15346.5	14180.8	15685
ENSDARG00000069048	1933.78	-0.51469	0.068554	-7.5078	6.01275e-14	8.56612e-12	FALSE	2602.46	2305.5	2339.9	2276.85	1575.13	1694.37	1773.01	1617.86
ENSDARG00000007421	844.788	-0.986375	0.131424	-7.50527	6.13025e-14	8.68418e-12	FALSE	1003.64	1179.13	1384.5	1269.54	581.85	620.856	633.272	608.252
ENSDARG00000093619	372.178	-1.81305	0.241721	-7.50056	6.35439e-14	8.95112e-12	FALSE	660.634	628.537	703.043	790.362	195.937	231.021	147.483	217.653
ENSDARG00000097074	133.91	2.12395	0.283382	7.49501	6.62957e-14	9.28658e-12	FALSE	39.7229	40.6165	18.9936	25.4829	146.073	84.648	132.379	173.666
ENSDARG00000024278	2143.61	-0.85137	0.113621	-7.49306	6.72865e-14	9.37301e-12	FALSE	2685.89	3001.8	2989.02	2556.25	1497.45	1606.87	1609.05	1512.91
ENSDARG00000006811	590.448	-1.32015	0.176441	-7.48213	7.31271e-14	1.01303e-11	FALSE	762.979	973.115	1093.4	1149.79	378.933	371.456	421.377	423.967
ENSDARG00000103436	58.4585	3.26677	0.436655	7.48136	7.35589e-14	1.01341e-11	FALSE	8.72608	8.59108	4.89433	5.40376	70.6306	49.5231	63.7313	76.06
ENSDARG00000040747	1967.57	-1.21957	0.163158	-7.47476	7.73441e-14	1.05974e-11	FALSE	2168.94	2618.58	3101.48	2895.57	1066.63	1202.91	1172.33	1191.12
ENSDARG00000040466	5018.98	-1.23375	0.1651	-7.47275	7.85363e-14	1.07023e-11	FALSE	6742.91	7833.92	8379.77	7263.81	2944.21	3343.94	3174.95	3387.96
ENSDARG00000055705	690.299	-1.16067	0.155559	-7.46129	8.56784e-14	1.16124e-11	FALSE	781.59	861.915	905.751	838.949	334.267	357.607	401.722	423.38
ENSDARG00000053476	61.801	-2.86666	0.387885	-7.3905	1.4628e-13	1.97195e-11	FALSE	92.2719	106.013	186.534	117.152	18.4706	13.8662	17.3032	19.2028
ENSDARG00000096978	54.4788	-2.62743	0.356248	-7.37528	1.64e-13	2.19752e-11	FALSE	84.3503	151.419	119.417	129.688	11.6109	14.1495	35.5215	17.637
ENSDARG00000077745	61.8482	4.34726	0.589486	7.37466	1.64766e-13	2.19752e-11	FALSE	0	9.59696	2.68309	2.56034	33.3081	56.0515	88.279	119.644
ENSDARG00000069018	477.258	-1.48641	0.202097	-7.35492	1.91036e-13	2.53442e-11	FALSE	757.433	728.146	801.786	696.528	280.853	261.535	269.583	252.712
ENSDARG00000042133	282.349	1.42031	0.193234	7.35023	1.97867e-13	2.61122e-11	FALSE	138.627	106.844	106.622	131.716	274.967	364.968	351.421	300.414
ENSDARG00000103025	2506.26	-0.791616	0.107721	-7.34876	2.00058e-13	2.62632e-11	FALSE	2960.08	3879.91	3316	3171.9	2019.29	1752.2	1937.33	1992.52
ENSDARG00000091800	147.609	-1.69761	0.231602	-7.32983	2.30439e-13	3.00939e-11	FALSE	228.174	274.281	273.94	300.524	72.8228	73.6724	63.0992	123.684
ENSDARG00000070604	110.3	-2.10615	0.287533	-7.32492	2.39035e-13	3.10547e-11	FALSE	265.222	98.7177	264.263	277.887	53.9975	52.5286	60.7368	43.0181
ENSDARG00000055656	116.093	-1.81242	0.247837	-7.31296	2.6132e-13	3.37749e-11	FALSE	194.324	190.795	199.38	228.795	63.3569	54.5125	66.1719	47.4697
ENSDARG00000097209	395.55	-0.896728	0.122732	-7.30636	2.74466e-13	3.52922e-11	FALSE	518.124	566.912	529.795	530.765	265.355	300.001	277.661	310.536
ENSDARG00000020956	3840.52	-0.930057	0.127334	-7.30409	2.79154e-13	3.57118e-11	FALSE	4530.84	4886.19	5385.43	5652.38	2395.06	2798.81	2749.1	2795.35
ENSDARG00000020890	6571.95	0.535492	0.0734511	7.29046	3.08904e-13	3.91185e-11	FALSE	5023.84	5019.95	4688.98	4926.06	7132.52	7226.24	7010.8	7121.19
ENSDARG00000056203	220.333	-1.16486	0.159774	-7.29067	3.08424e-13	3.91185e-11	FALSE	286.922	327.739	332.794	313.43	163.617	144.286	128.426	125.926
ENSDARG00000014031	1213.89	-1.25418	0.172287	-7.2796	3.34802e-13	4.21851e-11	FALSE	1584.08	1984.39	1982.87	1847.49	694.473	795.365	752.4	860.962
ENSDARG00000032496	239.844	-1.00651	0.138306	-7.27741	3.40289e-13	4.2662e-11	FALSE	308.561	354.271	382.29	382.13	158.466	187.949	172.542	194.057
ENSDARG00000104956	53.1033	-2.52064	0.346411	-7.27643	3.42767e-13	4.27589e-11	FALSE	152.124	78.1145	138.681	96.4371	26.5091	27.7299	16.4025	9.72677
ENSDARG00000054172	2019.12	-0.508664	0.0699259	-7.27433	3.48134e-13	4.32134e-11	FALSE	2321.61	2471.8	2581.85	2487.47	1625.16	1758.11	1845.81	1708.39
ENSDARG00000078139	1201.94	0.614465	0.0845594	7.26667	3.68461e-13	4.55113e-11	FALSE	969.54	935.959	948.683	885.366	1443.79	1353.49	1482.41	1441.16
ENSDARG00000099422	224.461	6.7105	0.925266	7.25251	4.0912e-13	5.02857e-11	FALSE	0	8.57403	4.03442	0	258.09	466.197	305.39	309.228
ENSDARG00000090903	90.0571	-1.87201	0.258144	-7.25181	4.1123e-13	5.02984e-11	FALSE	134.318	116.871	182.353	105.736	28.8356	42.4068	41.9774	34.2142
ENSDARG00000079166	993.256	-1.43457	0.198333	-7.23312	4.72008e-13	5.74521e-11	FALSE	1549.62	1581.53	1711.54	1660.56	615.824	609.365	518.492	662.595
ENSDARG00000021305	54.9569	1.93897	0.268346	7.22564	4.98752e-13	6.04141e-11	FALSE	12.6938	15.5048	24.3733	22.6955	77.6862	59.3892	73.0114	82.0158
ENSDARG00000039272	613.896	-0.823169	0.11438	-7.19676	6.16589e-13	7.43287e-11	FALSE	787.9	953.126	923.422	855.774	479.744	499.113	453.078	560.249
ENSDARG00000037281	2020.95	-1.30854	0.181871	-7.19491	6.25042e-13	7.49871e-11	FALSE	2169.59	2342.72	2882.57	2796.74	924.981	1086.44	948.009	1156.75
ENSDARG00000074613	159.876	-2.10752	0.293058	-7.19146	6.41027e-13	7.65387e-11	FALSE	234.876	367.027	341.257	407.787	61.5438	118.195	77.9644	56.1389
ENSDARG00000029587	269.386	-1.21759	0.169436	-7.18611	6.66648e-13	7.92205e-11	FALSE	394.585	341.941	358.475	428.198	169.505	176.33	147.384	161.492
ENSDARG00000100442	689.128	-1.26105	0.175786	-7.17381	7.29369e-13	8.62651e-11	FALSE	1004.98	1217.88	1100.47	1134.47	403.07	537.155	427.83	492.773
ENSDARG00000036456	2422.32	-0.750831	0.104804	-7.16411	7.8291e-13	9.21628e-11	FALSE	3069.97	3158.58	3175.24	3074.8	1719.14	1856.97	1874.99	1965.67
ENSDARG00000092077	62.4499	-2.52137	0.352591	-7.15097	8.61687e-13	1.00962e-10	FALSE	148.962	177.391	107.689	142.814	18.8118	14.1183	46.8945	20.9762
ENSDARG00000019986	1770.73	-0.909748	0.12732	-7.14537	8.9757e-13	1.04678e-10	FALSE	2498.83	2367.64	2745.6	2681.57	1299.53	1430.79	1378.38	1371.47
ENSDARG00000093907	99.8596	-1.78058	0.249323	-7.14168	9.21999e-13	1.07029e-10	FALSE	154.812	151.16	179.509	222.385	51.8731	49.4702	28.3462	77.2664
ENSDARG00000018600	947.756	-0.619056	0.086866	-7.12657	1.02902e-12	1.18901e-10	FALSE	1120.88	1193.09	1218.64	1284.12	796.166	781.824	776.161	785.41
ENSDARG00000044914	1786.56	-0.836648	0.117499	-7.12048	1.07553e-12	1.23705e-10	FALSE	2277.32	2536.13	2413.81	2554.38	1343.07	1497.9	1366.27	1270.88
ENSDARG00000014624	30.315	-6.83096	0.959942	-7.11602	1.1109e-12	1.27191e-10	FALSE	35.0289	61.1112	130.055	122.871	0	3.02875	0	0
ENSDARG00000016771	12379	-0.971842	0.137056	-7.09085	1.33286e-12	1.5191e-10	FALSE	17380.3	19372.7	19428.3	21029.8	10300.4	10583.3	10440.5	8043.18
ENSDARG00000013056	786.163	-0.967521	0.136748	-7.0752	1.49236e-12	1.69318e-10	FALSE	929.034	1073.74	1174.7	1167.43	489.153	606.983	503.122	625.58
ENSDARG00000062132	606.2	-1.3098	0.1855	-7.06089	1.65439e-12	1.86856e-10	FALSE	929.536	1036.99	1185.12	1231.85	393.889	442.094	462.014	472.038
ENSDARG00000005112	3135.67	-0.786753	0.111512	-7.05532	1.72202e-12	1.93623e-10	FALSE	3535.25	4076.04	4234.84	4062.03	2337.17	2360.79	2131.04	2394.7
ENSDARG00000011521	391.531	-1.23691	0.175702	-7.03985	1.92444e-12	2.15417e-10	FALSE	478.849	606.175	789.831	723.298	277.027	261.525	276.188	289.761
ENSDARG00000055270	176.864	1.78022	0.253016	7.036	1.97835e-12	2.20468e-10	FALSE	76.2764	36.8004	56.062	37.783	202.288	143.375	196.305	158.589
ENSDARG00000098802	1101.64	-0.669139	0.0951505	-7.03243	2.02969e-12	2.25188e-10	FALSE	1395.27	1302.54	1307.46	1409.1	863.955	877.131	781.323	881.861
ENSDARG00000067520	333.194	-1.01098	0.143926	-7.02428	2.15168e-12	2.37671e-10	FALSE	566.285	449.316	529.001	498.709	298.135	289.804	194.072	229.542
ENSDARG00000079269	34.5106	-2.67694	0.38121	-7.02222	2.18377e-12	2.40157e-10	FALSE	46.5429	62.2833	54.8244	78.3602	9.67408	11.1172	7.31411	9.92112
ENSDARG00000030743	293.606	-0.878125	0.125206	-7.01344	2.3253e-12	2.54606e-10	FALSE	431.782	416.405	406.17	365.099	237.609	230.94	205.124	205.053
ENSDARG00000104085	1557.84	-0.632123	0.090279	-7.00188	2.52555e-12	2.72955e-10	FALSE	1888.71	2066.23	1968.14	2047.34	1337.3	1258.41	1378.02	1169.93
ENSDARG00000076381	387.632	-1.30405	0.186236	-7.00214	2.52082e-12	2.72955e-10	FALSE	513.989	746.418	740.299	656.034	259.159	311.752	245.363	260.716
ENSDARG00000003977	178.566	-1.43851	0.205424	-7.00263	2.51193e-12	2.72955e-10	FALSE	281.059	260.816	289.449	293.948	109.087	90.9307	94.1725	121.306
ENSDARG00000105212	87.7563	-1.95686	0.279803	-6.99372	2.67689e-12	2.86839e-10	FALSE	217.318	147.31	174.631	170.19	34.3581	40.9055	48.6071	58.8267
ENSDARG00000101956	17.9865	-5.68324	0.812577	-6.9941	2.6697e-12	2.86839e-10	FALSE	56.7451	46.9026	53.1192	54.9284	0	1.00407	3.13839	0
ENSDARG00000094557	2037.4	-0.795448	0.113798	-6.99002	2.7485e-12	2.93259e-10	FALSE	2406.18	2810.28	2506.24	2504.09	1333.27	1574.71	1524.86	1460.97
ENSDARG00000086826	1969.77	-0.863206	0.123528	-6.98792	2.78982e-12	2.95879e-10	FALSE	2510.81	2562.29	2956.19	2627.7	1295	1461.77	1511.77	1592.09
ENSDARG00000042684	1270.43	-1.05978	0.151667	-6.98758	2.79665e-12	2.95879e-10	FALSE	1692.56	1841	2096.96	2131.83	833.495	967.639	946.049	978.511
ENSDARG00000103589	237.831	-0.862999	0.12365	-6.97936	2.96521e-12	3.12394e-10	FALSE	301.704	351.086	298.012	274.266	182.235	161.145	168.252	160.578
ENSDARG00000039752	260.645	-1.50554	0.21641	-6.95687	3.47905e-12	3.64995e-10	FALSE	424.198	469.922	369.59	418.753	132.993	197.976	103.709	157.749
ENSDARG00000012694	2813.52	-1.31211	0.188792	-6.95001	3.65265e-12	3.8161e-10	FALSE	3259.5	3499.66	3617.52	4033.35	1325.32	1494.75	1439.86	1544.39
ENSDARG00000087070	74.4257	-1.97612	0.284362	-6.94932	3.67063e-12	3.81898e-10	FALSE	125.382	93.4166	216.419	152.753	35.8584	45.4522	32.7618	35.5974
ENSDARG00000090618	183.898	-1.80286	0.259745	-6.94089	3.89629e-12	4.037e-10	FALSE	300.997	298.561	381.637	293.558	105.494	73.7826	80.4313	105.817
ENSDARG00000041685	289.889	-2.07928	0.299735	-6.93705	4.00382e-12	4.13135e-10	FALSE	474.23	560.403	746.298	705.623	180.788	134.388	119.14	154.322
ENSDARG00000018621	733.331	-1.30728	0.188588	-6.93196	4.15055e-12	4.2652e-10	FALSE	800.447	984.477	909.52	1135.49	365.297	327.402	407.788	448.744
ENSDARG00000096217	17.4262	-3.49438	0.504712	-6.92352	4.4056e-12	4.50882e-10	FALSE	55.3084	48.3096	45.091	36.9513	4.83126	4.04191	6.27429	1.1026
ENSDARG00000012194	2657.41	-0.850005	0.122797	-6.92202	4.45244e-12	4.53823e-10	FALSE	3381.37	3731	3879.67	4090.13	2040.14	2217.95	2038.41	2072.95
ENSDARG00000039605	2866.77	-0.941064	0.136182	-6.91035	4.83467e-12	4.90788e-10	FALSE	3668.77	4061	4336.1	4508.46	2091.58	2190.92	2150.44	2201.8
ENSDARG00000099470	739.606	-1.521	0.220474	-6.89878	5.24493e-12	5.30288e-10	FALSE	1186.11	1433.96	1168.02	983.983	332.106	391.949	530.907	407.951
ENSDARG00000076710	83.5183	1.93938	0.281157	6.89784	5.2798e-12	5.31669e-10	FALSE	18.9829	27.8756	41.4115	27.1157	122.997	134.282	108.113	82.7806
ENSDARG00000036041	1617.15	-1.08409	0.157432	-6.8861	5.7342e-12	5.75117e-10	FALSE	2538.63	2357.71	2588.55	2560.48	1098.63	1241.69	1139.51	1258.91
ENSDARG00000098063	33.6555	-2.39609	0.348113	-6.88308	5.85719e-12	5.85112e-10	FALSE	61.3875	57.8731	65.1864	59.7047	9.59365	10.094	14.711	12.1448
ENSDARG00000055589	2478.33	0.662523	0.0963478	6.87636	6.13999e-12	6.10256e-10	FALSE	1989.14	1954.64	2111.88	2039.32	3122.08	3682.86	2671.76	3337.86
ENSDARG00000093005	36.4187	3.59283	0.522521	6.87596	6.15757e-12	6.10256e-10	FALSE	0	3.2144	3.97331	8.16795	27.7188	45.4303	81.2308	46.4502
ENSDARG00000027082	141.951	1.28899	0.187554	6.87265	6.30194e-12	6.22105e-10	FALSE	78.8412	67.5484	60.1302	57.8397	184.539	123.181	149.025	183.213
ENSDARG00000070844	6921.35	-0.916321	0.133461	-6.86582	6.61087e-12	6.50043e-10	FALSE	8128.08	8139.79	9625.1	8819.81	4557.73	4774.46	4403.24	4658.51
ENSDARG00000089361	604.305	-0.762655	0.1114	-6.84611	7.58834e-12	7.43242e-10	FALSE	721.938	807.851	771.895	777.05	414.55	486.033	397.942	518.45
ENSDARG00000100174	1226.84	2.08073	0.3041	6.84226	7.79554e-12	7.60566e-10	FALSE	308.932	356.626	354.154	512.486	1383.85	1324.47	2179.8	1599.61
ENSDARG00000027381	18.1575	7.525	1.10086	6.83555	8.16917e-12	7.93929e-10	FALSE	0	0	0	0	44.4844	48.5554	36.6486	16.5585
ENSDARG00000092170	5954.74	-0.877293	0.128403	-6.83235	8.35372e-12	8.0873e-10	FALSE	6752.28	6641.45	8366.82	7794.82	3783.17	4094.22	3923.61	4290.96
ENSDARG00000005867	1641.84	0.617409	0.0904755	6.82405	8.8511e-12	8.53587e-10	FALSE	1224.08	1295.31	1195.33	1281.14	1975.12	1979.1	1768	1943.14
ENSDARG00000068515	781.238	-1.31439	0.192641	-6.82299	8.91677e-12	8.56624e-10	FALSE	959.003	1166.32	1144.57	1200.72	430.584	508.374	310.317	550.619
ENSDARG00000019228	282.444	-1.51905	0.222867	-6.81593	9.36536e-12	8.96286e-10	FALSE	487.678	449.534	498.652	411.765	154.657	193.084	122.445	174.248
ENSDARG00000070394	966.924	-1.04819	0.153817	-6.81455	9.45612e-12	9.01532e-10	FALSE	1183.6	1312.16	1635.93	1554.25	637.245	632.717	670.313	812.165
ENSDARG00000034174	367.738	-0.787941	0.115761	-6.80663	9.99098e-12	9.48916e-10	FALSE	529.586	481.024	502.567	454.486	278.741	322.931	267.181	268.367
ENSDARG00000101629	1001.82	-2.26642	0.33318	-6.80239	1.02894e-11	9.66317e-10	FALSE	1647.24	1670.59	2191.92	2076.98	305.452	420.382	378.452	472.98
ENSDARG00000024877	1494.37	2.39344	0.35182	6.80302	1.02445e-11	9.66317e-10	FALSE	477.739	556.913	424.145	448.694	2382.67	2623.33	2498.57	2516.8
ENSDARG00000101499	24.9387	7.71442	1.13415	6.80194	1.03222e-11	9.66317e-10	FALSE	0	0	0	0	39.6786	33.5828	48.4182	45.5536
ENSDARG00000101473	19.5706	7.74884	1.13923	6.80185	1.03283e-11	9.66317e-10	FALSE	0	0	0	0	45.7517	46.618	29.8412	48.9498
ENSDARG00000069752	2521.43	-0.93583	0.137678	-6.79722	1.06658e-11	9.9418e-10	FALSE	2770.26	3215.01	3814.94	3881.78	1489.49	1912.89	1731.65	2022.4
ENSDARG00000052336	548.641	-0.800724	0.11782	-6.79616	1.07445e-11	9.97809e-10	FALSE	640.329	859.559	695.076	773.773	383.301	430.443	447.452	446.225
ENSDARG00000039064	373.56	-0.934637	0.13784	-6.7806	1.19674e-11	1.10727e-09	FALSE	393.424	570.868	505.846	570.162	275.817	248.507	259.674	286.778
ENSDARG00000002986	402.301	-1.72516	0.254824	-6.77003	1.28757e-11	1.18693e-09	FALSE	560.533	689.554	770.525	775.237	237.525	222.163	146.882	239.502
ENSDARG00000096577	73.6383	4.55995	0.673649	6.76903	1.29648e-11	1.19077e-09	FALSE	0	1.07362	4.90731	1.80387	43.4538	42.4463	53.3795	58.4642
ENSDARG00000100524	4019.83	0.79571	0.11761	6.76567	1.32694e-11	1.2143e-09	FALSE	2100.5	2186.13	2185.48	2361.62	4082.74	3511.98	3452.7	4290.81
ENSDARG00000078844	407.799	1.21048	0.179076	6.75958	1.38397e-11	1.26187e-09	FALSE	132.679	228.621	202.913	282.253	497.205	492.801	474.308	508.419
ENSDARG00000015662	1898.28	-1.15525	0.171139	-6.75036	1.47478e-11	1.3398e-09	FALSE	2397.79	2738.14	2877.45	2801.59	1059	1260.08	1285	1252.99
ENSDARG00000022832	341.653	-0.949738	0.141003	-6.73559	1.63268e-11	1.4779e-09	FALSE	578.825	537.86	597.043	564.56	294.963	316.528	305.514	261.974
ENSDARG00000013871	705.071	-1.20077	0.178399	-6.7308	1.68731e-11	1.51738e-09	FALSE	660.045	825.682	903.763	937.674	343.851	349.943	387.611	367.837
ENSDARG00000068729	76.3961	-1.75978	0.261455	-6.73071	1.68839e-11	1.51738e-09	FALSE	110.945	160.985	130.631	136.534	43.4872	35.0866	38.3756	42.4276
ENSDARG00000059035	3590.01	-0.953591	0.141895	-6.72038	1.81253e-11	1.62312e-09	FALSE	4230.68	4439.56	4823.83	4882.1	2042.55	2685.18	2222.47	2540.03
ENSDARG00000104995	169.53	-1.28801	0.191913	-6.71144	1.92712e-11	1.71959e-09	FALSE	291.525	273.193	343.688	243.09	112.074	100.61	121.151	137.76
ENSDARG00000098746	1215.07	-1.18098	0.176033	-6.70884	1.96183e-11	1.73819e-09	FALSE	1716.57	1932.63	2100.69	1792.41	670.982	912.517	841.277	902.888
ENSDARG00000092404	34.0432	-2.69363	0.401494	-6.70902	1.95936e-11	1.73819e-09	FALSE	63.0261	57.1119	85.8079	92.2521	15.6582	12.94	11.3193	5.94907
ENSDARG00000024160	509.048	-0.845125	0.126137	-6.70004	2.08359e-11	1.83958e-09	FALSE	600.406	751.763	758.183	788.351	386.326	431.808	381.223	417.591
ENSDARG00000022399	738.208	-0.697823	0.104386	-6.68504	2.30865e-11	2.03113e-09	FALSE	917.901	1014.5	918.88	978.329	622.379	594.776	576.881	567.209
ENSDARG00000029493	121.646	-1.29658	0.194025	-6.68253	2.34859e-11	2.05904e-09	FALSE	169.388	192.984	156.775	179.869	69.1843	57.5495	74.5253	83.8847
ENSDARG00000006865	364.423	-0.870506	0.130435	-6.67385	2.49178e-11	2.16941e-09	FALSE	643.964	456.251	540.412	517.838	295.255	266.594	313.834	302.622
ENSDARG00000094747	22.1108	7.32295	1.0972	6.67423	2.48533e-11	2.16941e-09	FALSE	0	0	0	0	30.9471	21.7186	33.8832	41.0175
ENSDARG00000058638	381.652	-0.977107	0.146797	-6.65619	2.81022e-11	2.43819e-09	FALSE	527.601	595.897	537.221	470.369	248.507	324.023	276.332	232.954
ENSDARG00000002197	1138.47	-0.76448	0.114905	-6.65317	2.86852e-11	2.48018e-09	FALSE	1497.53	1872.67	1610.66	1790.65	974.534	1052.5	1018.23	942.963
ENSDARG00000039516	314.566	-0.991262	0.149229	-6.64256	3.0829e-11	2.65638e-09	FALSE	422.752	480.32	546.278	468.015	223.813	272.906	226.075	243.308
ENSDARG00000051876	416.793	-0.823456	0.124033	-6.63902	3.15771e-11	2.71152e-09	FALSE	539.273	580.561	491.721	542.204	298.392	320.013	290.205	308.168
ENSDARG00000067851	183.358	-1.14655	0.172756	-6.63683	3.20504e-11	2.74277e-09	FALSE	259.636	304.992	298.234	328.516	128.726	148.243	134.004	128.217
ENSDARG00000033285	1430.76	-0.806378	0.121753	-6.62307	3.51816e-11	3.00049e-09	FALSE	1915.68	1937.21	2264.36	1938.53	992.674	1201.22	1122.63	1292.04
ENSDARG00000071592	609.905	-1.06662	0.161136	-6.61936	3.60763e-11	3.06317e-09	FALSE	850.724	868.985	865.761	748.642	327.098	374.144	432.575	458.699
ENSDARG00000053068	567.678	-1.23637	0.186805	-6.61851	3.6283e-11	3.06317e-09	FALSE	923.84	1002.66	827.451	786.895	331.809	337.266	388.133	445.838
ENSDARG00000097066	47.9019	4.88064	0.737395	6.61876	3.62225e-11	3.06317e-09	FALSE	1.47988	0	0	4.60192	59.1518	17.2154	40.6837	70.7214
ENSDARG00000053858	2870.19	-0.622239	0.0940852	-6.61357	3.75168e-11	3.1567e-09	FALSE	3134.73	3519.98	3732.24	3524.82	2059.53	2333.86	2352.05	2297.31
ENSDARG00000023111	1611.83	-1.01053	0.152904	-6.6089	3.87184e-11	3.23608e-09	FALSE	1965.83	2204.65	2430.11	2492.1	1168.23	1141.7	1031.63	1173.34
ENSDARG00000092806	40.3018	3.44677	0.521505	6.60928	3.86195e-11	3.23608e-09	FALSE	4.40276	13.8938	5.97376	3.63126	66.5516	117.858	39.0671	81.7625
ENSDARG00000092358	1698.96	-6.13859	0.932718	-6.58141	4.66016e-11	3.88202e-09	FALSE	3954.66	2702.38	1955.33	2451.13	31.413	46.8857	35.1714	43.5765
ENSDARG00000058445	211.031	-1.28397	0.195286	-6.57482	4.87126e-11	4.04444e-09	FALSE	309.727	324.789	315.809	296.601	105.608	109.027	149.137	149.029
ENSDARG00000090185	1368.01	-0.820556	0.124979	-6.56557	5.18346e-11	4.28944e-09	FALSE	1658.51	1929.76	1902.94	1946.2	1068.42	1016.92	1050.65	1077.32
ENSDARG00000095578	25.2043	3.65069	0.556286	6.56262	5.28719e-11	4.36089e-09	FALSE	5.13213	3.78884	4.14552	3.81372	73.1609	44.0669	58.1401	34.2633
ENSDARG00000046098	275.414	-0.836883	0.12754	-6.56174	5.31848e-11	4.37232e-09	FALSE	301.889	351.49	341.52	309.144	161.311	167.614	211.516	191.525
ENSDARG00000098566	170.386	1.43025	0.218093	6.558	5.45344e-11	4.46861e-09	FALSE	59.7674	87.9759	106.161	101.982	238.034	256.561	230.468	242.692
ENSDARG00000101352	31.1424	3.74175	0.571192	6.55078	5.72373e-11	4.67481e-09	FALSE	1.45642	2.14654	3.92548	1.80353	37.6425	24.2475	42.9061	23.1593
ENSDARG00000018459	759.343	-0.669386	0.102253	-6.54639	5.89462e-11	4.79876e-09	FALSE	924.701	992.633	960.075	956.629	574.224	639.037	664.735	533.177
ENSDARG00000104826	2615.5	0.585076	0.0894877	6.53806	6.23201e-11	5.05701e-09	FALSE	2015.13	1761.94	1930.83	1989.34	2821.22	2798.26	2879.78	3046.13
ENSDARG00000045799	259.264	-1.10406	0.168978	-6.53373	6.41519e-11	5.18886e-09	FALSE	328.838	434.84	355.631	361.304	150.814	150.573	188.162	200.653
ENSDARG00000101967	1884.06	0.443141	0.0679355	6.52297	6.89283e-11	5.55726e-09	FALSE	1362.11	1358.61	1467.84	1513.52	1881.28	1886.13	1965.9	2029.37
ENSDARG00000036171	304.931	-1.49622	0.229731	-6.51294	7.36961e-11	5.92262e-09	FALSE	401.686	374.129	432.169	439.582	111.459	160.526	156.513	155.972
ENSDARG00000018351	1269.66	-1.11774	0.171641	-6.51206	7.4129e-11	5.93837e-09	FALSE	1606.51	1845.02	2379.9	2452.53	905.883	1053.01	841.971	1018.81
ENSDARG00000098037	141.393	3.48992	0.536439	6.50571	7.73254e-11	6.17471e-09	FALSE	7.32041	13.9228	20.8046	11.7777	98.5307	159.415	175.823	177.851
ENSDARG00000098315	652.998	-0.972192	0.14951	-6.50252	7.89832e-11	6.28706e-09	FALSE	683.506	746.799	712.327	776.871	340.335	365.673	411.579	371.729
ENSDARG00000041569	3893.69	-1.6966	0.261185	-6.49578	8.26032e-11	6.55441e-09	FALSE	5701.76	6235.04	7898.51	8594.9	2193.06	2290.95	1762.71	2525.06
ENSDARG00000018263	1026.67	-1.21834	0.187611	-6.49397	8.36029e-11	6.61281e-09	FALSE	1376.88	2200.1	1873.09	1615.98	655.436	955.143	748.319	678.783
ENSDARG00000091834	925.126	-0.747638	0.115272	-6.48586	8.8225e-11	6.95646e-09	FALSE	986.779	1302.94	1281.82	1312.83	679.519	748.856	760.051	725.198
ENSDARG00000097976	16.1438	7.11238	1.09963	6.46795	9.93383e-11	7.80817e-09	FALSE	0	0	0	0	25.5039	40.7103	20.4433	23.333
ENSDARG00000017821	223.501	-0.917432	0.142022	-6.45977	1.04861e-10	8.21653e-09	FALSE	266.849	274.622	330.462	308.738	134.847	164.63	164.529	163.281
ENSDARG00000092858	149.868	-0.98511	0.152556	-6.45735	1.06554e-10	8.32312e-09	FALSE	217.411	164.947	213.903	237.829	103.521	106.662	107.237	103.921
ENSDARG00000102552	105.209	2.0757	0.321603	6.45424	1.08765e-10	8.46951e-09	FALSE	7.31149	41.7892	53.3797	28.0548	150.499	127.169	104.084	179.991
ENSDARG00000099276	471.319	-1.38978	0.21544	-6.45086	1.11217e-10	8.63359e-09	FALSE	746.781	864.703	927.667	776.534	356.361	361.641	303.656	244.599
ENSDARG00000070057	503.373	-1.31876	0.204851	-6.43765	1.21339e-10	9.39031e-09	FALSE	715.665	609.679	868.032	783.808	304.064	285.874	254.086	350.146
ENSDARG00000105027	56.2842	-2.23574	0.347896	-6.42645	1.30615e-10	1.00771e-08	FALSE	70.8265	48.1074	124.937	101.787	16.8852	24.2208	19.2082	13.2318
ENSDARG00000058999	141.362	-1.04228	0.162211	-6.42544	1.31487e-10	1.01132e-08	FALSE	186.848	174.781	209.892	168.973	79.7999	85.8268	109.121	84.9793
ENSDARG00000095963	259.871	-0.942758	0.146873	-6.41885	1.37307e-10	1.05285e-08	FALSE	388.173	365.693	384.096	421.864	209.705	200.952	230.752	169.942
ENSDARG00000052271	821.418	-0.663612	0.103434	-6.41582	1.4007e-10	1.07076e-08	FALSE	980.637	1082.82	1048.68	1058.69	641.314	687.423	580.798	726.312
ENSDARG00000104613	4176.01	0.579456	0.0903443	6.41387	1.41874e-10	1.08126e-08	FALSE	2800.43	2591.4	3122.96	3536.7	4700.23	4297.87	4566.93	4454.19
ENSDARG00000042993	5572.85	-1.92811	0.300732	-6.41139	1.44194e-10	1.09231e-08	FALSE	8095.07	12073.3	11961.5	10669.3	2512.62	3678.45	2404.77	2650.88
ENSDARG00000104524	15.1188	-7.9102	1.23372	-6.41164	1.43963e-10	1.09231e-08	FALSE	8.71465	37.4914	59.6733	75.5463	0	0	0	0
ENSDARG00000006840	1057.31	-0.710678	0.110949	-6.40545	1.49925e-10	1.12552e-08	FALSE	1250.16	1359.15	1237.08	1408.62	746.323	889.93	734.766	841.718
ENSDARG00000063665	401.822	-0.754748	0.117815	-6.4062	1.49191e-10	1.12552e-08	FALSE	464.553	558.491	507.991	513.489	243.905	334.223	313.991	322.373
ENSDARG00000077504	65.704	-2.67739	0.41798	-6.40555	1.49827e-10	1.12552e-08	FALSE	182.938	184.898	104.72	133.765	19.7291	20.1749	41.5866	13.2411
ENSDARG00000101667	210.213	-1.01075	0.157933	-6.39989	1.55487e-10	1.16379e-08	FALSE	258.034	332.585	327.36	321.302	170.56	128.279	139.337	178.712
ENSDARG00000042811	129.702	-1.04129	0.16326	-6.37811	1.79289e-10	1.33795e-08	FALSE	226.316	191.919	184.353	248.543	112.442	109.044	97.6072	93.8156
ENSDARG00000013371	367.528	-0.618283	0.0969936	-6.37447	1.83597e-10	1.36603e-08	FALSE	492.396	474.62	503.954	498.273	332.566	315.87	323.148	311.033
ENSDARG00000004574	180.174	0.865049	0.135764	6.3717	1.86947e-10	1.38684e-08	FALSE	127.653	124.778	119.656	131.447	217.119	224.747	205.374	275.119
ENSDARG00000099558	285.157	-1.73178	0.271966	-6.36762	1.9198e-10	1.41997e-08	FALSE	415.725	506.498	480.073	563.864	208.281	116.911	94.2315	172.621
ENSDARG00000009160	393.932	-1.11608	0.175522	-6.35863	2.03565e-10	1.50123e-08	FALSE	623.753	701.812	710.063	647.743	344.774	307.776	261.342	324.293
ENSDARG00000102020	483.369	-1.18044	0.185733	-6.35561	2.07598e-10	1.52649e-08	FALSE	610.231	681.944	703.699	712.092	276.853	295.843	284.375	338.823
ENSDARG00000022372	444.603	-1.13701	0.179003	-6.35191	2.12652e-10	1.55907e-08	FALSE	721.68	700.318	697.138	729.615	334.994	368.13	255.867	335.991
ENSDARG00000000068	928.983	-0.712483	0.112335	-6.34245	2.26133e-10	1.64674e-08	FALSE	1086.71	1314.32	1286	1183.78	720.309	750.019	692.996	811.872
ENSDARG00000027986	421.559	-0.738414	0.11643	-6.34215	2.2658e-10	1.64674e-08	FALSE	476.587	553.004	598.736	591.736	331.868	313.927	360.505	327.944
ENSDARG00000015866	28576.2	-1.0999	0.17341	-6.34277	2.25668e-10	1.64674e-08	FALSE	39271.8	40854.7	48632.9	50398.7	18995.9	22638.3	19673.2	22280.2
ENSDARG00000008969	2766.49	-1.17414	0.185257	-6.33791	2.32909e-10	1.68785e-08	FALSE	2766.16	2854.27	3425.61	3274.83	1289.74	1512.45	1350.78	1307.77
ENSDARG00000088502	25.7801	6.93918	1.09626	6.32985	2.45392e-10	1.77319e-08	FALSE	0	0	0	0	25.7284	25.1125	22.5642	24.1848
ENSDARG00000076981	148.708	-1.19231	0.188558	-6.32329	2.56054e-10	1.84491e-08	FALSE	191.175	241.289	226.533	220.424	92.3416	98.9601	76.5707	118.078
ENSDARG00000003931	1810.38	-0.709162	0.112422	-6.30804	2.82595e-10	2.03031e-08	FALSE	2318.18	2318.87	2559.49	2679.68	1424.67	1553.35	1563.59	1501.75
ENSDARG00000074359	47.3142	2.08309	0.330277	6.30712	2.84282e-10	2.0366e-08	FALSE	18.9279	23.6147	12.7511	9.91685	90.7737	61.6337	72.1833	46.3142
ENSDARG00000093044	559.842	-1.13438	0.180555	-6.28272	3.32708e-10	2.37673e-08	FALSE	652.491	695.282	733.11	794.916	358.228	310.819	261.929	379.914
ENSDARG00000053448	227.888	-1.48366	0.23622	-6.28083	3.36774e-10	2.39894e-08	FALSE	363.835	319.508	269.319	226.515	72.4819	92.2344	130.212	126.577
ENSDARG00000040255	655.798	-0.903247	0.143892	-6.27726	3.44584e-10	2.44071e-08	FALSE	783.305	927.799	804.991	795.545	405.279	409.017	443.452	514.169
ENSDARG00000053684	12549.5	-1.03567	0.16498	-6.27754	3.4397e-10	2.44071e-08	FALSE	14870.5	15237.7	17680.8	16711.2	7572.61	8190.33	7107.45	8593.31
ENSDARG00000102456	1268.03	-0.887494	0.141401	-6.27642	3.46456e-10	2.44705e-08	FALSE	1477.41	1395.75	1957.5	1845.76	730.905	933.85	860.477	1087.89
ENSDARG00000071087	827.266	-0.583798	0.0931144	-6.26969	3.61762e-10	2.54799e-08	FALSE	1032.72	1056.52	1040.16	963.491	629.594	611.003	800.926	689.601
ENSDARG00000043171	113.615	-1.65965	0.265356	-6.25442	3.99002e-10	2.8024e-08	FALSE	166.861	290.268	210.916	128.618	49.7663	79.7131	63.1505	59.6468
ENSDARG00000091624	542.317	-1.09693	0.175504	-6.25018	4.0997e-10	2.8714e-08	FALSE	892.329	863.521	812.243	811.789	456.178	343.676	410	369.519
ENSDARG00000051939	1880.58	-1.0311	0.165039	-6.24763	4.16737e-10	2.91066e-08	FALSE	2458.97	2849.17	3030.81	2807.82	1378.1	1398.82	1255.62	1423.03
ENSDARG00000091136	83.5353	-2.01166	0.322114	-6.24519	4.23273e-10	2.9481e-08	FALSE	115.682	137.233	181.771	164.336	38.9047	24.5899	30.8049	54.9396
ENSDARG00000071891	18.2808	-3.67298	0.588785	-6.23824	4.42524e-10	3.07365e-08	FALSE	37.8833	33.2602	58.9335	52.3219	3.85672	5.05028	3.14109	2.20578
ENSDARG00000104519	30.9198	6.79032	1.089	6.23535	4.50775e-10	3.1223e-08	FALSE	1.46692	0	0.993789	0	67.7836	54.489	67.5271	50.8621
ENSDARG00000079647	532.178	-0.852451	0.136722	-6.2349	4.5206e-10	3.12257e-08	FALSE	599.44	670.408	760.539	660.926	381.292	376.711	349.051	385.06
ENSDARG00000042978	424.282	-0.901997	0.144705	-6.23336	4.56525e-10	3.14476e-08	FALSE	584.517	592.243	588.732	620.88	322.875	316.161	293.301	345.277
ENSDARG00000060126	57.9154	-8.03841	1.29096	-6.22669	4.76407e-10	3.27272e-08	FALSE	105.355	145.881	172.075	111.391	1.91992	0	0	0
ENSDARG00000063078	54.7338	-1.61482	0.259519	-6.22233	4.89819e-10	3.35566e-08	FALSE	102.04	90.1222	82.5674	113.713	21.202	41.4135	33.5221	30.8879
ENSDARG00000022493	39.6165	-3.26222	0.524774	-6.21642	5.08623e-10	3.47499e-08	FALSE	115.599	69.2641	101.095	91.8391	3.76765	14.8218	15.3854	5.3977
ENSDARG00000009250	4516.45	-0.368158	0.0593509	-6.20306	5.53744e-10	3.77298e-08	FALSE	4980.36	5351.96	5242.57	5150.17	3909.94	4151.45	3980.94	4018.6
ENSDARG00000078246	43.7696	8.49784	1.37022	6.2018	5.58199e-10	3.79303e-08	FALSE	0	0	0	0	80.1806	64.7949	81.8926	60.811
ENSDARG00000018077	26.714	-3.03509	0.489791	-6.19672	5.76534e-10	3.90703e-08	FALSE	42.6465	47.0376	108.863	65.4924	14.2408	9.07025	5.2916	3.31833
ENSDARG00000021004	358.01	-1.11393	0.179878	-6.19271	5.91403e-10	3.99699e-08	FALSE	520.678	451.024	502.196	506.171	197.364	234.474	231.951	251.332
ENSDARG00000091956	111.872	1.79746	0.290899	6.17901	6.4506e-10	4.34791e-08	FALSE	45.277	57.8902	57.2102	33.4493	178.662	143.361	167.985	183.234
ENSDARG00000063330	4284.56	1.99352	0.322907	6.17367	6.67222e-10	4.48523e-08	FALSE	1150.34	1257.98	1176.29	1264.63	4767.38	5810.18	2981.26	5752.07
ENSDARG00000053405	317.27	-0.997281	0.161567	-6.17255	6.71988e-10	4.50519e-08	FALSE	421.987	463.946	541.889	567.753	252.31	220.376	292.808	236.597
ENSDARG00000076139	9.99848	-7.13513	1.15748	-6.16435	7.07714e-10	4.73206e-08	FALSE	44.8953	13.7991	22.1429	27.0643	0	0	0	0
ENSDARG00000068220	171.709	-1.40976	0.229308	-6.14787	7.85313e-10	5.23695e-08	FALSE	239.277	286.3	309.089	190.643	73.2696	122.822	101.6	88.4283
ENSDARG00000103295	3520.13	-2.4921	0.405449	-6.14653	7.91954e-10	5.26723e-08	FALSE	5745.9	5581.88	7816.67	8034.25	1110.84	1208.16	856.583	1655.64
ENSDARG00000068667	31.2545	2.27335	0.370344	6.13848	8.33132e-10	5.52644e-08	FALSE	6.07977	11.1803	7.35409	15.4638	40.5126	52.727	38.6865	66.9051
ENSDARG00000035629	163.63	-1.12018	0.182531	-6.13694	8.4127e-10	5.5657e-08	FALSE	234.939	290.628	295.439	220.41	94.2769	137.335	129.006	119.179
ENSDARG00000097137	1784.14	1.28065	0.208708	6.13609	8.45794e-10	5.5809e-08	FALSE	924.662	829.708	418.75	463.32	1404.08	1532.25	1838.04	1617.68
ENSDARG00000074698	98.4487	-1.47485	0.240555	-6.13101	8.73211e-10	5.74669e-08	FALSE	108.214	144.652	147.299	119.464	47.9264	44.4076	38.902	56.3169
ENSDARG00000028106	2102.42	-0.453006	0.073895	-6.13041	8.76526e-10	5.75341e-08	FALSE	2454.89	2518.85	2648.94	2412.68	1732.43	1859.14	1939.9	1801.33
ENSDARG00000042613	543.985	-1.26191	0.2059	-6.12876	8.85651e-10	5.79812e-08	FALSE	1035.63	806.915	870.332	1087.28	391.721	453.299	384.549	354.591
ENSDARG00000002523	2446.94	-0.413715	0.0675177	-6.12751	8.92653e-10	5.82874e-08	FALSE	2707.9	2919.57	2933.14	2877.81	2107.56	2217.71	2083.32	2182.04
ENSDARG00000042920	700.925	-1.85216	0.302775	-6.11728	9.51832e-10	6.19902e-08	FALSE	1118.88	1316.81	1272.79	1334.31	287.474	374.038	323.249	412.414
ENSDARG00000076838	1670.07	-1.14146	0.18667	-6.1149	9.66201e-10	6.2763e-08	FALSE	2201.14	2422.73	3040.03	3181.78	1189.46	1378.91	1049.01	1300.45
ENSDARG00000038106	814.76	-0.978848	0.160249	-6.10828	1.00711e-09	6.52511e-08	FALSE	1142.4	1143.55	1123.07	1189.15	463.629	697.167	550.839	622.521
ENSDARG00000006215	1153.45	-0.92963	0.152281	-6.1047	1.02994e-09	6.65587e-08	FALSE	1369.43	1502.36	1749.76	1641.26	793.483	778.838	819.457	898.196
ENSDARG00000105300	335.74	0.881909	0.14453	6.10193	1.04798e-09	6.75505e-08	FALSE	269.21	227.611	167.56	167.603	345.071	366.822	403.552	404.626
ENSDARG00000017314	4002.27	-1.52856	0.250688	-6.09744	1.07784e-09	6.92967e-08	FALSE	4722.52	6649.03	7055.17	7506.13	2145.52	2869.18	1711.99	2262.76
ENSDARG00000104866	28.1095	4.0358	0.662334	6.09331	1.10602e-09	7.09267e-08	FALSE	0	4.29194	7.91883	0	47.0358	67.7139	72.6422	19.9034
ENSDARG00000040463	578.046	0.713269	0.117506	6.07007	1.27855e-09	8.17816e-08	FALSE	482.19	379.523	328.408	428.956	696.678	611.257	650.378	679.759
ENSDARG00000103330	244.833	10.3979	1.71349	6.06826	1.29303e-09	8.24972e-08	FALSE	0	0	0.983193	0	454.669	502.553	422.385	394.154
ENSDARG00000091560	710.994	-1.97495	0.325535	-6.06678	1.30499e-09	8.30489e-08	FALSE	1247.02	1264.66	1299.72	1191.84	376.474	270.666	295.595	329.894
ENSDARG00000068680	1629.57	-2.18922	0.361776	-6.0513	1.43684e-09	9.12082e-08	FALSE	2249.52	3466.1	3685.3	3301.83	582.152	1157.13	441.908	604.317
ENSDARG00000104450	73.0681	-1.72208	0.285392	-6.03409	1.59865e-09	1.01224e-07	FALSE	137.222	153.938	149.103	106.353	60.9974	34.3083	27.7401	41.9061
ENSDARG00000029230	710.597	-2.56455	0.425107	-6.03272	1.61218e-09	1.01823e-07	FALSE	1038.67	1330.27	1482.07	1802.84	199.807	251.882	176.967	327.413
ENSDARG00000091609	160.039	-1.31967	0.218839	-6.03034	1.63612e-09	1.03076e-07	FALSE	239.53	253.428	233.065	271.097	86.1956	124.053	97.708	91.7866
ENSDARG00000093405	248.565	-1.82997	0.303697	-6.02565	1.68429e-09	1.05844e-07	FALSE	416.521	465.929	432.015	387.948	126.224	37.2354	143.852	170.048
ENSDARG00000005713	579.638	-0.743599	0.123534	-6.0194	1.75066e-09	1.0974e-07	FALSE	699.537	690.903	830.56	775.224	418.337	455.089	408.301	510.286
ENSDARG00000018342	134.448	-1.19284	0.19819	-6.01865	1.75877e-09	1.09974e-07	FALSE	150.149	190.971	173.989	183.208	67.458	83.8365	67.046	88.2517
ENSDARG00000035438	3842.92	-1.70947	0.28427	-6.01355	1.81509e-09	1.13213e-07	FALSE	4847.35	7031.42	7266.06	7828.64	2398.31	2039.27	1735.05	2075.51
ENSDARG00000045638	363.521	-1.51071	0.251477	-6.00735	1.88577e-09	1.17329e-07	FALSE	358.535	425.965	426.462	480.044	132.071	173.742	140.345	147.812
ENSDARG00000079544	205.145	-1.98963	0.331282	-6.00585	1.90333e-09	1.18129e-07	FALSE	324.302	388.874	493.132	452.99	81.158	82.6354	95.6929	159.166
ENSDARG00000076780	1346.73	-0.441557	0.073571	-6.00178	1.95169e-09	1.20831e-07	FALSE	1595.58	1660.74	1636.6	1576.97	1191.74	1295.03	1101.42	1175.38
ENSDARG00000019838	852.633	-0.690463	0.115151	-5.99614	2.02069e-09	1.24795e-07	FALSE	1148.92	1271.75	1211.68	1089.29	667.62	687.549	788.425	783.196
ENSDARG00000056462	127.913	-2.231	0.372237	-5.9935	2.05373e-09	1.26524e-07	FALSE	192.96	286.326	318.868	386.557	60.8499	40.0212	64.3898	87.8389
ENSDARG00000074191	246.444	-1.70994	0.285537	-5.98849	2.11797e-09	1.30161e-07	FALSE	351.412	441.515	603.18	575.341	142.683	136.931	152.122	171.745
ENSDARG00000075428	87.9182	1.9961	0.333691	5.98188	2.20575e-09	1.35225e-07	FALSE	10.2666	20.334	30.8096	47.1842	84.8839	121.019	158.246	80.685
ENSDARG00000002587	8161.35	0.443281	0.0741429	5.97875	2.24863e-09	1.37517e-07	FALSE	7236.04	6969.41	6755.35	6894.07	9719.77	9258.61	9602.61	9287.64
ENSDARG00000045414	582.862	-1.34325	0.224913	-5.97233	2.33883e-09	1.42685e-07	FALSE	650.576	872.808	1013.5	1000.36	296.659	327.398	431.861	339.595
ENSDARG00000099091	1101.73	0.827576	0.138668	5.96802	2.4015e-09	1.46153e-07	FALSE	907.809	533.137	651.182	754.806	1271.14	1142.58	1301.8	1326.22
ENSDARG00000018266	176.529	-1.00374	0.16825	-5.96577	2.43488e-09	1.47826e-07	FALSE	282.319	254.447	238.13	218.974	95.6849	143.494	126.508	128.997
ENSDARG00000099200	4815.99	-1.05566	0.177137	-5.95958	2.52894e-09	1.53166e-07	FALSE	6876.79	7513.33	8294.8	7909.26	3143.84	4374.93	3597.72	3602.63
ENSDARG00000045835	572.211	-3.29922	0.554036	-5.95489	2.6025e-09	1.57241e-07	FALSE	867.853	1366.48	1799.03	1591.47	121.612	214.262	88.9784	146.567
ENSDARG00000019236	873.349	-0.542017	0.0910855	-5.95064	2.67103e-09	1.60994e-07	FALSE	1069.26	1107.25	1135.9	944.404	723.262	682.995	726.428	791.002
ENSDARG00000079543	441.988	-0.963488	0.16198	-5.94819	2.71124e-09	1.63026e-07	FALSE	600.409	612.496	833.832	837.483	347.641	377.044	435.305	321.634
ENSDARG00000103135	448.052	-0.698599	0.117505	-5.94526	2.76013e-09	1.65568e-07	FALSE	652.349	635.831	579.904	523.339	338.861	332.845	413.319	386.787
ENSDARG00000044753	2780.36	-0.314095	0.0528714	-5.94074	2.8374e-09	1.69797e-07	FALSE	3272.41	3395.73	3206.37	3255.99	2646.97	2673.61	2520.97	2719.68
ENSDARG00000002764	198.446	-1.53833	0.259217	-5.93453	2.94695e-09	1.75933e-07	FALSE	232.84	365.172	420.222	336.182	97.5377	125.103	98.9915	145.826
ENSDARG00000088911	34.4564	-1.73076	0.292017	-5.9269	3.08712e-09	1.83863e-07	FALSE	64.3494	55.9368	73.1504	73.1002	19.0675	21.3333	24.1613	15.7841
ENSDARG00000102632	22581.6	0.397863	0.0673241	5.90967	3.42789e-09	2.03675e-07	FALSE	18245.2	16570	17653.7	16765.1	21984.2	21659.1	23926.2	23644.3
ENSDARG00000099546	660.522	-0.928512	0.157187	-5.90706	3.48267e-09	2.06441e-07	FALSE	839.801	989.817	1064.51	1028.32	442.555	571.932	510.3	538.064
ENSDARG00000101324	46624.3	-1.01714	0.172368	-5.90098	3.61359e-09	2.13696e-07	FALSE	64985.6	64965.9	78117.6	77854.9	30938.8	41005.8	33454.7	35875.6
ENSDARG00000054218	68.26	-1.43805	0.243773	-5.89915	3.65379e-09	2.15565e-07	FALSE	77.4097	95.4112	124.286	94.0204	34.5793	32.3067	46.1963	32.0108
ENSDARG00000069603	2235.59	0.470612	0.0799183	5.88867	3.89318e-09	2.2915e-07	FALSE	1721.78	1656.56	1786.35	1859.14	2638.86	2116.86	2518.31	2462.93
ENSDARG00000070029	254.473	-0.86782	0.147459	-5.88515	3.97702e-09	2.33536e-07	FALSE	351.305	364.783	301.755	338.426	182.149	216.159	172.845	170.985
ENSDARG00000037307	515.67	-0.753121	0.128194	-5.87484	4.23255e-09	2.4796e-07	FALSE	679.412	700.491	637.534	561.9	370.384	373.154	397.872	387.653
ENSDARG00000006029	955.025	-0.95166	0.162052	-5.87255	4.29151e-09	2.50828e-07	FALSE	1235.55	1247.41	1372.93	1240.78	617.976	682.696	676.223	658.72
ENSDARG00000076371	671.187	-0.501857	0.0854677	-5.87189	4.30863e-09	2.51243e-07	FALSE	875.473	870.938	762.468	892.482	614.441	635.723	605.935	543.434
ENSDARG00000102744	1627.35	-0.390966	0.0666096	-5.86951	4.37077e-09	2.54275e-07	FALSE	1977.29	2014.63	1903.38	1796.18	1426.77	1487.52	1499.81	1448.06
ENSDARG00000030913	2412.33	-0.398622	0.0681645	-5.84794	4.97683e-09	2.88864e-07	FALSE	3192.96	3090.18	3014.56	3026.74	2352.32	2470.04	2222	2300.25
ENSDARG00000001354	160.97	-1.33263	0.227915	-5.84705	5.00357e-09	2.89745e-07	FALSE	272.669	258.536	341.252	246.438	118.482	109.081	94.3109	122.459
ENSDARG00000099185	9143.58	-2.14931	0.367852	-5.84285	5.13142e-09	2.96464e-07	FALSE	13301	12826	18660.1	17493.9	3305.24	3506.58	2733.06	4494.86
ENSDARG00000103034	509.947	-1.2141	0.207809	-5.84236	5.14656e-09	2.96655e-07	FALSE	713.503	913.586	846.298	647.536	299.928	353.889	387.618	304.044
ENSDARG00000076862	31.7679	-3.42826	0.587512	-5.83522	5.37185e-09	3.08931e-07	FALSE	99.456	41.7864	58.3937	94.6952	1.34416	14.927	2.92431	10.6415
ENSDARG00000057064	582.095	-0.987373	0.169229	-5.83453	5.39434e-09	3.09514e-07	FALSE	811.219	906.916	862.611	976.606	500.943	507.178	366.268	420.174
ENSDARG00000014572	2809.95	-0.564657	0.0969012	-5.82714	5.63836e-09	3.22777e-07	FALSE	3164.19	3438.82	3636.8	3676.17	2178.63	2383.9	2416.27	2434.5
ENSDARG00000057253	53.7884	2.67945	0.459989	5.82504	5.71002e-09	3.26134e-07	FALSE	20.491	5.35557	2.97049	9.05735	35.4124	58.524	96.8275	39.7641
ENSDARG00000076844	149.588	1.61723	0.277894	5.81958	5.89941e-09	3.36186e-07	FALSE	49.8208	88.0517	67.8905	65.7558	214.95	240.015	187.277	183.204
ENSDARG00000043684	475.452	-0.733153	0.126175	-5.81059	6.22525e-09	3.5395e-07	FALSE	622.37	746.309	707.056	522.487	398.118	342.978	424.222	397.754
ENSDARG00000100531	819.108	-0.456056	0.078503	-5.8094	6.26963e-09	3.55667e-07	FALSE	927.455	912.886	975.735	964.169	677.069	719.112	674.921	686.233
ENSDARG00000089724	105.207	1.39004	0.239566	5.8023	6.54104e-09	3.70226e-07	FALSE	51.0159	84.7606	68.7958	54.1449	187.953	185.86	108.936	197.456
ENSDARG00000100075	925.236	-0.945507	0.163036	-5.79939	6.65565e-09	3.75864e-07	FALSE	1186.11	1044.24	1152.19	1108.8	579.776	601.646	534.233	616.165
ENSDARG00000037874	16.432	6.42305	1.10791	5.79744	6.73358e-09	3.79411e-07	FALSE	0	0	0	0	18.2755	14.1711	11.5931	24.3594
ENSDARG00000087452	809.27	0.394552	0.0680977	5.79391	6.8766e-09	3.866e-07	FALSE	654.044	681.937	637.693	696.744	888.199	903.679	876.236	844.306
ENSDARG00000020647	813.475	0.439755	0.0760732	5.78069	7.43941e-09	4.17306e-07	FALSE	619.686	610.368	628.373	668.628	850.539	878.282	820.549	882.438
ENSDARG00000077004	2499.24	-0.701352	0.121351	-5.77954	7.49061e-09	4.1924e-07	FALSE	3223.75	3336.91	3427.66	3499.66	1966.7	2151.78	1982.29	2195.7
ENSDARG00000017985	385.779	-0.755501	0.130755	-5.778	7.55931e-09	4.22143e-07	FALSE	513.684	524.352	521.462	489.317	236.45	290.819	342.044	347.706
ENSDARG00000035603	270.103	-0.763333	0.132227	-5.7729	7.79181e-09	4.3416e-07	FALSE	276.81	330.886	367.784	328.066	193.118	183.613	188.535	205.49
ENSDARG00000012640	181.548	-1.22493	0.212484	-5.76483	8.17393e-09	4.54441e-07	FALSE	217.034	300.747	289.136	354.743	111.617	122.032	145.562	119.364
ENSDARG00000009443	793.613	-2.30874	0.400513	-5.76446	8.19212e-09	4.54445e-07	FALSE	1072.5	1756.77	2076.94	2037.56	388.741	500.7	175.42	336.71
ENSDARG00000067767	27.3413	3.01194	0.523011	5.75885	8.46891e-09	4.68763e-07	FALSE	5.84885	2.14309	3.95364	4.52474	39.3062	43.3994	26.2821	20.9801
ENSDARG00000104125	75.0477	1.27288	0.221231	5.75362	8.73547e-09	4.79222e-07	FALSE	40.4532	41.6972	29.9238	31.9234	97.6882	78.0021	80.6415	87.7344
ENSDARG00000059227	4246.26	-1.40236	0.243728	-5.75378	8.72691e-09	4.79222e-07	FALSE	5545.93	5379.32	6477.8	6096.75	1680.42	2231.39	2471.77	2507.52
ENSDARG00000069524	63.961	-1.57723	0.274106	-5.75409	8.71086e-09	4.79222e-07	FALSE	106.174	96.1466	126.672	93.249	38.6379	38.3042	19.1577	45.2961
ENSDARG00000079478	40.1912	-1.74818	0.303858	-5.75327	8.75343e-09	4.79222e-07	FALSE	71.6968	72.8448	60.3666	52.5184	12.4487	27.2461	14.7294	22.0891
ENSDARG00000075159	597.389	-2.32516	0.404132	-5.75347	8.74307e-09	4.79222e-07	FALSE	912.961	1152.52	1263.61	985.175	253.089	245.184	183.691	178.815
ENSDARG00000056781	2082.9	-1.80395	0.313632	-5.75179	8.83028e-09	4.82375e-07	FALSE	2925.57	3577.74	3931.76	4055.9	1080.08	1107.52	849.634	1113.12
ENSDARG00000016704	255.138	-0.836071	0.145483	-5.74686	9.09142e-09	4.95562e-07	FALSE	344.489	333.543	418.399	399.67	208.377	226.348	201.851	202.937
ENSDARG00000035602	24.7843	2.45983	0.428315	5.74304	9.29933e-09	5.05795e-07	FALSE	7.30534	7.50319	7.89612	4.5216	38.3987	37.3512	30.4598	41.9499
ENSDARG00000100374	3909.76	-0.345808	0.0602365	-5.74084	9.42106e-09	5.11306e-07	FALSE	4500.91	4951.81	4848.09	4627.49	3665.98	3612.77	3787.79	3832.46
ENSDARG00000042428	1114.89	-0.70885	0.123573	-5.73627	9.67834e-09	5.24135e-07	FALSE	1481.02	1443.5	1482.99	1467.71	836.834	962.817	928.087	866.788
ENSDARG00000055160	36.8242	-1.75237	0.305521	-5.73566	9.71308e-09	5.24883e-07	FALSE	65.5148	72.9931	52.9591	77.5267	24.1449	22.229	17.7828	15.4377
ENSDARG00000079361	185.015	-1.50694	0.262819	-5.73375	9.82361e-09	5.29715e-07	FALSE	226.271	205.167	268.815	223.616	92.2294	75.0732	61.9736	95.8077
ENSDARG00000104497	1106.23	0.551615	0.0962405	5.73163	9.94711e-09	5.35223e-07	FALSE	765.311	819.234	729.81	777.534	1093.5	1180.34	1237.62	1019.78
ENSDARG00000095360	53.9145	-1.72098	0.3003	-5.73087	9.99184e-09	5.36478e-07	FALSE	91.8412	82.6102	94.3718	90.2524	17.3455	27.2719	25.1431	39.7136
ENSDARG00000016412	541.104	-1.03709	0.180988	-5.73019	1.00317e-08	5.37466e-07	FALSE	595.568	576.959	655.67	641.594	320.667	271.254	277.691	334.632
ENSDARG00000028862	331.644	0.883572	0.154319	5.72562	1.03058e-08	5.50974e-07	FALSE	170.233	255.718	268.628	267.819	444.959	499.127	439.167	402.393
ENSDARG00000044528	576.065	-2.12125	0.370708	-5.72216	1.0518e-08	5.61123e-07	FALSE	1012.83	1042.96	1175.02	1051.13	203.443	200.011	252.382	328.706
ENSDARG00000105252	178.986	1.15703	0.202392	5.71676	1.08576e-08	5.78013e-07	FALSE	102.264	80.3947	117.433	82.2857	222.751	237.237	169.084	221.885
ENSDARG00000087633	131.327	-1.25025	0.218748	-5.71549	1.09391e-08	5.81118e-07	FALSE	171.742	215.786	252.888	191.06	93.7312	87.9122	86.7914	81.5913
ENSDARG00000102057	28.3407	-2.52952	0.44288	-5.71153	1.11967e-08	5.93542e-07	FALSE	54.8937	58.9443	80.7515	63.5742	12.7515	16.7902	8.7994	6.23406
ENSDARG00000100498	236.048	-0.833216	0.145899	-5.71091	1.12371e-08	5.9443e-07	FALSE	256.107	319.946	388.016	328.891	187.526	177.854	200.725	162.07
ENSDARG00000060622	145.896	-1.95439	0.342342	-5.70889	1.13717e-08	6.0028e-07	FALSE	134.021	180.293	372.089	270.584	60.7839	71.7282	33.4963	81.6148
ENSDARG00000034403	39.1721	-2.05516	0.360037	-5.7082	1.14175e-08	6.01436e-07	FALSE	89.773	60.9183	53.0155	40.0598	9.47919	12.0921	14.833	22.1228
ENSDARG00000079009	824.331	-0.626315	0.109739	-5.70732	1.14771e-08	6.03304e-07	FALSE	953.79	1016.55	1057.38	933.042	636.347	656.651	610.038	663.591
ENSDARG00000104899	76.7856	4.81425	0.84363	5.70659	1.15264e-08	6.04628e-07	FALSE	6.98586	7.53131	4.04703	2.49292	134.908	49.9504	237.082	168.449
ENSDARG00000037533	27.411	-3.19276	0.559807	-5.70332	1.17496e-08	6.15053e-07	FALSE	78.7602	34.3366	94.4375	74.0417	11.5616	3.03077	7.33733	8.82814
ENSDARG00000013628	3013.68	-0.549593	0.0965093	-5.69471	1.23579e-08	6.45547e-07	FALSE	3389.96	3353.71	3470.29	3277.97	2348.8	2187.66	2298.59	2382.74
ENSDARG00000025089	354.822	-1.17848	0.207031	-5.69229	1.2535e-08	6.53436e-07	FALSE	448.127	446.308	461.73	725.028	217.298	194.612	241.519	268
ENSDARG00000061585	207.933	-1.07291	0.188828	-5.68194	1.33172e-08	6.92773e-07	FALSE	246.381	339.017	361.792	336.657	170.549	161.609	144.581	134.587
ENSDARG00000104207	108.391	-1.73955	0.306183	-5.68141	1.3359e-08	6.93506e-07	FALSE	127.119	183.289	174.717	182.681	35.5158	57.5404	55.6711	51.8862
ENSDARG00000030872	167.494	-0.880402	0.155076	-5.67722	1.369e-08	7.09221e-07	FALSE	198.616	234.786	286.002	256.724	126.813	128.22	132.274	145.7
ENSDARG00000025595	634.774	-0.654417	0.115377	-5.67197	1.41162e-08	7.29795e-07	FALSE	707.941	729.165	868.063	812.295	438.458	496.792	468.984	580.498
ENSDARG00000013763	1515.24	-0.385916	0.0680454	-5.67145	1.41593e-08	7.30513e-07	FALSE	1719.74	1930.46	1915.77	1813.03	1454.66	1361.52	1489.44	1345.36
ENSDARG00000043175	13.6979	-3.49966	0.617622	-5.66635	1.45875e-08	7.51062e-07	FALSE	19.5508	27.6186	42.3614	38.7103	3.87479	3.75445	0.981129	3.01571
ENSDARG00000042379	142.305	-1.26986	0.224217	-5.66356	1.48261e-08	7.61782e-07	FALSE	149.057	231.509	261.649	235.163	79.6514	94.8877	86.1466	104.881
ENSDARG00000031657	299.542	-0.829504	0.146614	-5.65774	1.53375e-08	7.86448e-07	FALSE	424.847	357.108	487.052	400.082	204.25	230.805	222.141	283.147
ENSDARG00000032650	456.421	-0.694002	0.12274	-5.65425	1.56524e-08	8.00954e-07	FALSE	647.848	529.207	609.974	618.393	341.911	425.385	376.563	341.831
ENSDARG00000101127	3054.3	-0.551866	0.0976706	-5.65028	1.60184e-08	8.18014e-07	FALSE	3541.13	3327.88	3490.54	3516.98	2009.19	2315.1	2758.52	2384.1
ENSDARG00000104106	121.965	-1.16919	0.206992	-5.64846	1.61892e-08	8.25057e-07	FALSE	187.23	223.277	197.899	175.392	103.771	79.6159	85.0833	79.5764
ENSDARG00000014794	6141.94	-0.401634	0.071161	-5.64402	1.66128e-08	8.44928e-07	FALSE	7203.17	7149.91	7050.51	6905.48	5099.51	5474.19	5277.88	5577.81
ENSDARG00000038153	6751.31	-0.985233	0.174731	-5.63856	1.71483e-08	8.70397e-07	FALSE	7208.59	8053.51	9389.98	9093.92	3854.94	4312.05	3895.64	4985.94
ENSDARG00000073742	6241.99	-1.55954	0.276628	-5.6377	1.72336e-08	8.7296e-07	FALSE	8906.01	13133.1	12241.7	10199.1	3115.29	4782.08	3421.58	3771.67
ENSDARG00000039069	92.1892	-1.36741	0.242599	-5.6365	1.73544e-08	8.77306e-07	FALSE	213.618	121.353	144.808	188.007	81.0323	64.1155	57.055	55.8821
ENSDARG00000099428	43.2564	-3.70114	0.65706	-5.63288	1.77222e-08	8.94097e-07	FALSE	86.0533	124.714	9.09785	215.739	5.69602	7.66473	7.93811	12.9807
ENSDARG00000074085	75.3379	1.45053	0.257849	5.62549	1.84983e-08	9.31377e-07	FALSE	24.8525	45.0086	25.6892	40.7153	88.2302	77.7194	114.563	96.0607
ENSDARG00000079420	533.074	-1.18579	0.210823	-5.62457	1.85972e-08	9.34483e-07	FALSE	694.596	888.727	938.889	803.355	373.636	378.884	285.636	424.564
ENSDARG00000019260	479.5	-0.97505	0.173372	-5.62402	1.86565e-08	9.35586e-07	FALSE	625.1	646.901	661.663	795.374	336.784	325.901	330.551	396.561
ENSDARG00000098645	501.658	-0.615021	0.109407	-5.62138	1.89436e-08	9.48086e-07	FALSE	601.104	618.224	705.022	639.021	398.663	482.412	366.993	427.362
ENSDARG00000037190	126.034	1.16751	0.20772	5.62061	1.90286e-08	9.50445e-07	FALSE	69.8803	66.5534	50.9947	78.426	142.946	140.448	152.717	160.992
ENSDARG00000105046	419.101	0.623727	0.11105	5.61663	1.94723e-08	9.70674e-07	FALSE	342.143	338.126	284.424	280.365	479.013	461.753	491.658	478.573
ENSDARG00000061201	1339.84	-0.642164	0.114479	-5.60943	2.02995e-08	1.00766e-06	FALSE	1708.02	1954.28	1887.91	1746.37	1135.84	1296.51	1078.79	1165.13
ENSDARG00000057830	365.636	0.818224	0.145866	5.60941	2.0302e-08	1.00766e-06	FALSE	278.523	322.16	264.949	248.083	442.379	421.773	573.203	523.801
ENSDARG00000105208	145.478	-0.895101	0.159582	-5.60903	2.03459e-08	1.00766e-06	FALSE	191.074	215.598	218.446	174.27	105.903	98.9734	95.3933	130.195
ENSDARG00000097504	228.76	-1.0259	0.182909	-5.60879	2.03751e-08	1.00766e-06	FALSE	270.598	208.306	255.636	273.871	102.501	147.546	108.698	136.702
ENSDARG00000037873	372.285	-1.35246	0.241163	-5.60806	2.04611e-08	1.00992e-06	FALSE	474.004	490.205	685.75	685.298	266.717	243.398	188.674	216.251
ENSDARG00000078918	133.885	-1.58389	0.282747	-5.60181	2.12127e-08	1.04497e-06	FALSE	206.502	223.79	272.425	303.577	85.4926	91.7727	63.2325	95.7335
ENSDARG00000016598	6089.82	-0.261957	0.0467917	-5.59836	2.1639e-08	1.06387e-06	FALSE	6845.83	6751.37	7064.77	6717.43	5650.85	5987.75	5559.24	5634.26
ENSDARG00000038865	610.53	-0.738963	0.132156	-5.59159	2.24993e-08	1.10383e-06	FALSE	756.843	877.163	876.283	793.985	499.693	485.358	474.936	521.115
ENSDARG00000070830	291.85	-0.812708	0.145359	-5.59104	2.25708e-08	1.10383e-06	FALSE	437.136	370.202	464.585	426.711	252.681	250.531	220.91	242.66
ENSDARG00000036888	155.337	1.24352	0.222416	5.59094	2.25837e-08	1.10383e-06	FALSE	79.4945	68.9824	79.6207	80.951	176.359	137.762	252.001	165.463
ENSDARG00000102889	3764.95	0.31112	0.05572	5.58363	2.35544e-08	1.14903e-06	FALSE	3640.16	3473.04	3592.12	3451.78	4242.55	4408.46	4475.72	4432.99
ENSDARG00000043137	311.536	0.953173	0.170758	5.582	2.37772e-08	1.15765e-06	FALSE	220.151	227.269	265.47	194.697	429.701	466.456	481.293	379.268
ENSDARG00000040898	96.8908	-1.40694	0.252438	-5.57342	2.49793e-08	1.21382e-06	FALSE	153.729	156.364	163.465	144.05	71.7456	55.4926	64.2229	40.8725
ENSDARG00000028431	1106.26	-0.776016	0.139262	-5.57233	2.51351e-08	1.21903e-06	FALSE	1555.67	1366.71	1463.09	1497.68	960.707	840.75	763.237	869.905
ENSDARG00000012314	1935.14	0.412221	0.0740099	5.56981	2.5502e-08	1.23444e-06	FALSE	1503.94	1545.57	1537.52	1535.2	2050.64	2150.01	1863.43	2084.42
ENSDARG00000074947	67.9891	1.47651	0.265219	5.56713	2.58976e-08	1.25117e-06	FALSE	36.5095	40.7394	28.5992	26.2144	87.427	85.8173	100.778	90.5099
ENSDARG00000095739	37.5546	2.57798	0.463266	5.56479	2.62471e-08	1.26561e-06	FALSE	11.758	4.27711	10.9743	3.63633	38.0141	48.3808	38.0715	53.088
ENSDARG00000030166	213.446	-0.987816	0.177557	-5.56338	2.64593e-08	1.2734e-06	FALSE	323.791	368.989	297.104	286.113	128.83	160.754	189.378	164.786
ENSDARG00000036846	533.245	-0.756816	0.136044	-5.56302	2.65151e-08	1.27364e-06	FALSE	640.819	721.069	717.696	638.695	366.604	427.074	380.889	435.217
ENSDARG00000076713	18.0155	5.30391	0.954317	5.5578	2.73193e-08	1.30976e-06	FALSE	0	1.11995	1.15787	0	33.9807	23.2374	24.1831	22.7609
ENSDARG00000101762	1475.96	-0.525978	0.0946701	-5.55591	2.76176e-08	1.32154e-06	FALSE	1684.11	1639.27	1854.16	2002.82	1117.51	1297.56	1223.71	1353.91
ENSDARG00000076560	1379.13	0.552665	0.0995516	5.55154	2.83159e-08	1.35237e-06	FALSE	952.571	1222.8	1159.94	1150.27	1674.57	1616.69	1650.02	1647.89
ENSDARG00000095462	27.2723	-2.29508	0.41364	-5.54849	2.8814e-08	1.37354e-06	FALSE	41.2042	57.7138	53.0085	54.6228	10.4286	9.06912	8.47514	14.3797
ENSDARG00000056410	1091.96	-0.449208	0.0810608	-5.54161	2.99695e-08	1.42475e-06	FALSE	1293.24	1356.87	1374.67	1352.61	892.785	1047.38	1023.16	978.702
ENSDARG00000010862	767.874	-0.531818	0.0959713	-5.54142	3.0002e-08	1.42475e-06	FALSE	888.989	973.232	1075.86	927.213	588.91	673.672	750.655	663.99
ENSDARG00000014556	1248.37	-0.821596	0.148332	-5.53891	3.04364e-08	1.44265e-06	FALSE	1397.44	1385.46	1517.77	1432.49	780.047	771.786	807.78	885.218
ENSDARG00000055876	834.39	-1.02484	0.185042	-5.53841	3.05233e-08	1.44404e-06	FALSE	780.526	1062.06	925.508	906.454	411.542	413.849	518.058	463.716
ENSDARG00000102945	16.3521	-3.23963	0.585032	-5.53753	3.06759e-08	1.44853e-06	FALSE	39.9261	47.8207	48.5893	30.4304	3.78606	10.9044	1.5496	2.68569
ENSDARG00000076221	320.453	1.02037	0.184319	5.53587	3.09687e-08	1.45687e-06	FALSE	204.657	123.953	155.21	153.973	313.431	402.033	248.122	322.984
ENSDARG00000094197	41.7768	2.59811	0.469298	5.53617	3.09158e-08	1.45687e-06	FALSE	19.4938	16.4878	0	12.0645	69.8521	58.3142	77.2838	49.2175
ENSDARG00000026634	2376.96	0.351791	0.0636391	5.5279	3.24087e-08	1.52175e-06	FALSE	2066.83	1935.86	2014.98	2001.15	2603.68	2376.04	2563.95	2686
ENSDARG00000093957	427.835	1.11763	0.202522	5.51859	3.41736e-08	1.60162e-06	FALSE	194.52	184.825	198.716	135.067	447.73	392.982	252.856	449.988
ENSDARG00000016918	2114.83	-1.55299	0.281528	-5.51627	3.46267e-08	1.61983e-06	FALSE	3041.8	2981.22	3934.2	3446.46	1104.65	1072.89	1032.15	1358.79
ENSDARG00000038742	377.026	0.795254	0.144259	5.51269	3.53385e-08	1.65005e-06	FALSE	343.394	242.804	265.823	284.992	416.765	579.994	511.899	457.83
ENSDARG00000103814	37.5474	2.62626	0.476656	5.50975	3.59342e-08	1.67475e-06	FALSE	2.9496	18.1656	2.01251	14.6441	48.9287	82.6871	66.0622	41.9571
ENSDARG00000055138	90.6421	-1.11203	0.202143	-5.50122	3.77163e-08	1.75454e-06	FALSE	118.036	137.488	130.977	145.679	54.8442	57.8413	62.1277	72.5477
ENSDARG00000098957	835.955	-0.938206	0.170612	-5.49906	3.81812e-08	1.77288e-06	FALSE	1058.22	997.844	848.244	872.687	481.589	460.512	523.916	504.11
ENSDARG00000102145	233.968	0.885152	0.161334	5.48645	4.10094e-08	1.90068e-06	FALSE	179.464	157.964	136.505	153.874	262.921	260.092	298.721	332.008
ENSDARG00000067918	483.691	0.572897	0.104517	5.48137	4.22035e-08	1.95242e-06	FALSE	387.416	339.865	343.268	339.339	543.689	522.66	480.278	544.936
ENSDARG00000040930	1487.33	-0.519098	0.0947724	-5.47731	4.31832e-08	1.99406e-06	FALSE	1671.7	1772.25	1787.53	1886.09	1257.4	1243.87	1200.32	1268
ENSDARG00000098092	340.169	0.99645	0.181966	5.47601	4.35022e-08	2.0051e-06	FALSE	173.803	226.266	150.166	232.17	354.108	399.281	389.418	422.015
ENSDARG00000056008	7204.94	-0.414065	0.075696	-5.4701	4.49788e-08	2.06935e-06	FALSE	9185.16	9352.19	8471.08	8620.69	6291.93	6758.99	6998.26	6688.96
ENSDARG00000070038	3974.13	-1.0046	0.184105	-5.45667	4.85141e-08	2.22792e-06	FALSE	4397.22	5064.11	6017.48	5820.48	2224.83	2919.9	2364.8	3108.31
ENSDARG00000007080	496.274	-1.43168	0.262417	-5.45574	4.87703e-08	2.23559e-06	FALSE	770.601	687.384	679.699	1229.59	282.756	369.578	175.185	421.56
ENSDARG00000039423	382.392	-1.18487	0.21722	-5.4547	4.90566e-08	2.24461e-06	FALSE	527.667	508.557	689.962	661.488	225.532	279.797	249.305	296.739
ENSDARG00000011665	20092.7	-0.456762	0.0837474	-5.45405	4.92359e-08	2.24871e-06	FALSE	24609.5	25626.9	26389.2	26030.5	17344.6	19988.7	18623.1	18843.8
ENSDARG00000025325	734.554	0.500444	0.0917964	5.45167	4.98989e-08	2.27485e-06	FALSE	560.337	541.433	559.019	582.253	783.83	770.378	852.632	767.856
ENSDARG00000057844	11.8635	6.92812	1.27201	5.44659	5.13459e-08	2.33656e-06	FALSE	0	0	0	0	27.9175	6.07274	46.3257	16.6009
ENSDARG00000057498	218.822	-1.32358	0.243121	-5.44411	5.20651e-08	2.365e-06	FALSE	376.658	380.193	449.544	478.909	141.542	188.592	186.119	157.81
ENSDARG00000104702	2209.05	-0.499419	0.0918049	-5.44	5.32809e-08	2.41585e-06	FALSE	2699.11	2694.73	3193.47	2903.21	1968.77	2000.81	2006.83	2155.75
ENSDARG00000074507	370.081	-0.839595	0.15446	-5.43569	5.45859e-08	2.47055e-06	FALSE	477.966	372.85	523.262	479.779	253.784	283.355	245.681	252.93
ENSDARG00000005423	2885.34	-0.472005	0.0869	-5.43158	5.58568e-08	2.52352e-06	FALSE	3189.23	3311.71	3428.74	3400.71	2213.32	2592.48	2421.03	2386.63
ENSDARG00000070960	207.25	-1.53798	0.283247	-5.42983	5.64088e-08	2.54387e-06	FALSE	419.474	410.615	460.291	422.827	158.119	109.762	190.14	132.106
ENSDARG00000014849	54.5481	2.27229	0.418599	5.42832	5.68873e-08	2.56085e-06	FALSE	2.92876	8.56715	14.8659	11.7798	57.3767	31.276	45.2825	57.4461
ENSDARG00000021882	468.677	-0.699303	0.128985	-5.4216	5.90665e-08	2.65418e-06	FALSE	719.513	484.15	618.795	542.936	380.781	358.348	332.923	377.568
ENSDARG00000069828	275.86	-0.893332	0.164787	-5.42113	5.92241e-08	2.6565e-06	FALSE	334.008	449.531	465.762	414.907	248.208	213.89	204.094	231.092
ENSDARG00000096508	4834.98	-0.593719	0.109567	-5.4188	6.00003e-08	2.68651e-06	FALSE	4956.97	5471.33	5502.8	5695.61	3544.44	3355.13	3578.86	3855.25
ENSDARG00000003869	624.887	-0.616921	0.11392	-5.4154	6.11517e-08	2.73319e-06	FALSE	915.323	900.079	900.276	879.618	601.843	598.185	562.737	580.783
ENSDARG00000006691	32481.7	0.534923	0.0987942	5.41452	6.14541e-08	2.74181e-06	FALSE	24440.5	22734.6	24266.3	23752.1	33479.6	34528.4	35180.9	34732.5
ENSDARG00000080337	270526	-1.01153	0.186855	-5.41345	6.18209e-08	2.75328e-06	FALSE	337089	270730	301411	299673	154548	141982	149948	153159
ENSDARG00000104818	1698.31	-0.743712	0.137634	-5.40356	6.53293e-08	2.90438e-06	FALSE	1910.78	2081.31	2420.09	2130.65	1146.07	1161.19	1348.25	1449.05
ENSDARG00000039730	2912.48	-1.55021	0.28717	-5.39824	6.72961e-08	2.98652e-06	FALSE	4069.41	6116.15	5448.7	5692.21	1700.75	2342.77	1491.19	1747.79
ENSDARG00000039882	814.016	0.616424	0.114329	5.39165	6.9815e-08	3.09283e-06	FALSE	659.366	517.527	663.231	566.547	1099.71	802.128	850.882	930.998
ENSDARG00000069563	56.8569	1.59004	0.295529	5.38033	7.43488e-08	3.28787e-06	FALSE	28.5856	18.0321	18.9194	29.1079	61.6219	98.1302	63.8506	60.7096
ENSDARG00000095832	367.767	-0.798806	0.148535	-5.3779	7.53604e-08	3.32674e-06	FALSE	486.162	418.235	461.634	497.2	240.228	337.092	240.362	252.894
ENSDARG00000104538	414.176	-0.622968	0.116137	-5.3641	8.13556e-08	3.58508e-06	FALSE	460.293	442.162	500.625	516.777	315.543	323.289	325.511	283.438
ENSDARG00000020741	4759.86	-0.990969	0.184993	-5.3568	8.47072e-08	3.72623e-06	FALSE	4233.75	4480.99	5167.04	5060.75	2226.92	2375.61	2319.12	2610.36
ENSDARG00000039517	312.357	-0.762979	0.142503	-5.35413	8.59676e-08	3.77505e-06	FALSE	365.851	417.44	419.712	437.82	238.749	256.368	241.19	232.105
ENSDARG00000004452	6250.46	0.281219	0.0526475	5.34155	9.21576e-08	4.03274e-06	FALSE	5511.49	5482.78	5310.71	5363.76	6787.69	6203.99	6712.51	6623.52
ENSDARG00000012076	12608.4	-1.05992	0.19842	-5.34184	9.20103e-08	4.03274e-06	FALSE	16968.7	16276.7	20561	14100.3	7141.62	8229.95	7820.97	9379.76
ENSDARG00000011932	2177.03	0.354622	0.0664309	5.3382	9.38718e-08	4.10059e-06	FALSE	1958.15	1924.36	1862.51	1810.24	2403.15	2458.59	2337.23	2455.29
ENSDARG00000056498	1019.19	-2.8498	0.534806	-5.32866	9.89409e-08	4.31451e-06	FALSE	1573.78	2124.94	2995.27	3429.05	329.735	324.456	282.542	467.692
ENSDARG00000073909	681.038	-0.615396	0.115511	-5.32762	9.95102e-08	4.3318e-06	FALSE	718.066	898.436	838.489	811.178	547.901	528.75	525.332	532.238
ENSDARG00000041083	321.327	-1.11338	0.209139	-5.32364	1.01709e-07	4.41983e-06	FALSE	428.026	404.684	514.871	486.791	238.556	204.103	164.228	241.489
ENSDARG00000007988	104.701	-1.07886	0.202791	-5.32008	1.03724e-07	4.49961e-06	FALSE	170.282	189.282	159.991	194.622	68.279	105.864	76.3531	88.0989
ENSDARG00000054534	54.0203	-1.59338	0.299659	-5.31732	1.05305e-07	4.56031e-06	FALSE	91.9938	87.9153	87.7523	110.27	27.8666	40.3857	27.2905	29.801
ENSDARG00000075141	332.312	1.24453	0.234462	5.30803	1.10818e-07	4.79078e-06	FALSE	150.226	197.429	223.337	234.372	453.093	542.285	386.62	531.532
ENSDARG00000073766	808.513	-0.548684	0.103407	-5.30606	1.12018e-07	4.83433e-06	FALSE	1076.72	871.876	1211.72	969.92	684.554	683.345	769.487	685.878
ENSDARG00000003635	225.29	-0.783576	0.147716	-5.30461	1.12913e-07	4.85624e-06	FALSE	314.558	340.67	345.317	297.881	198.253	181.645	206.19	167.872
ENSDARG00000060797	1552.94	-0.803402	0.151453	-5.30463	1.12901e-07	4.85624e-06	FALSE	2389.58	2383.31	2314.92	2215.61	1384.01	1371.85	1239.67	1334.6
ENSDARG00000075800	220.918	-1.00405	0.189327	-5.30326	1.13754e-07	4.88404e-06	FALSE	288.351	304.963	361.832	293.871	144.986	176.733	146.32	155.235
ENSDARG00000035559	1518.59	0.484612	0.0914245	5.30068	1.15374e-07	4.94512e-06	FALSE	1127.44	1091.1	1030.77	1143.29	1398.05	1601.6	1711.91	1434.4
ENSDARG00000090361	29.5178	-2.28782	0.43167	-5.29992	1.15852e-07	4.9571e-06	FALSE	88.9979	61.1329	33.4722	74.0603	10.5854	18.1775	8.38887	15.4482
ENSDARG00000038881	2926.38	-0.521258	0.0983698	-5.29897	1.16459e-07	4.96614e-06	FALSE	3680.2	4118.54	3864.12	4066.35	2626.45	2773.69	2710.35	2851.82
ENSDARG00000069984	11.7672	5.86382	1.10658	5.29907	1.16396e-07	4.96614e-06	FALSE	0	0	0	0	10.5723	12.1478	15.8238	7.75414
ENSDARG00000076448	417.753	-1.03787	0.195954	-5.29648	1.18059e-07	5.02581e-06	FALSE	563.683	673.284	789.868	813.518	324.752	333.177	367.401	359.827
ENSDARG00000028163	181.384	-1.60082	0.302401	-5.29372	1.19851e-07	5.09347e-06	FALSE	132.217	188.95	153.108	163.024	51.7664	51.365	47.9054	58.8825
ENSDARG00000039266	1314.26	-0.724903	0.137033	-5.28999	1.22325e-07	5.1898e-06	FALSE	1770.13	1291.6	1781.61	2247.18	1109.76	1070.8	1065.21	1045.6
ENSDARG00000096712	311.338	-0.892	0.168693	-5.2877	1.23864e-07	5.24624e-06	FALSE	513.419	446.767	483.397	596.569	236.693	347.034	226.088	290.139
ENSDARG00000086569	618.395	-1.28622	0.243769	-5.27639	1.31753e-07	5.57094e-06	FALSE	698.035	964.641	1122.89	1205.39	371.228	426.289	355	485.333
ENSDARG00000104742	46.3652	-1.51907	0.287996	-5.27463	1.33022e-07	5.61514e-06	FALSE	64.4515	69.5998	60.4865	83.3862	28.6741	23.203	28.4428	16.5725
ENSDARG00000009470	60.4272	-1.42413	0.270078	-5.27304	1.34181e-07	5.65456e-06	FALSE	80.1147	115.906	117.795	90.1883	41.493	43.4419	25.1199	40.8063
ENSDARG00000102473	269.433	0.82423	0.156416	5.26947	1.36818e-07	5.75599e-06	FALSE	174.545	160	165.468	136.912	260.21	278.937	285.267	299.843
ENSDARG00000038123	884.732	-0.420987	0.0799156	-5.2679	1.37994e-07	5.79575e-06	FALSE	968.462	1018.13	960.104	897.7	704.998	710.453	682.567	772.639
ENSDARG00000061858	468.901	-1.89259	0.359816	-5.2599	1.44137e-07	6.04365e-06	FALSE	684.311	752.637	944.602	895.781	201.551	256.218	164.404	260.77
ENSDARG00000025912	227.898	0.902897	0.171729	5.2577	1.4587e-07	6.10607e-06	FALSE	178.468	106.102	139.562	133.246	277.072	270.016	226.08	261.242
ENSDARG00000035018	255.113	-2.23184	0.425061	-5.25064	1.5157e-07	6.33411e-06	FALSE	653.882	451.364	346.335	329.747	93.3714	100.224	77.2929	108.049
ENSDARG00000101742	82.5793	-2.1042	0.400922	-5.24841	1.53419e-07	6.40073e-06	FALSE	142.706	97.674	124.597	115.409	31.8603	17.176	49.1757	13.2332
ENSDARG00000100886	27.2636	-2.95768	0.563651	-5.24735	1.54303e-07	6.4269e-06	FALSE	42.7112	73.759	109.173	39.187	15.1583	9.07177	9.54564	0
ENSDARG00000040251	773.987	0.790904	0.150871	5.24225	1.58633e-07	6.59631e-06	FALSE	488.095	454.442	469.002	399.781	693.819	801.496	815.25	820.283
ENSDARG00000092550	12.1904	-3.08325	0.588582	-5.23844	1.61937e-07	6.72251e-06	FALSE	22.0836	23.509	26.0308	32.7949	1.89417	3.02284	3.18063	4.42446
ENSDARG00000101310	69.9209	1.52212	0.290643	5.23709	1.63128e-07	6.7608e-06	FALSE	30.8061	46.0152	24.8555	30.8567	114.411	106.895	81.2519	77.374
ENSDARG00000098805	572.118	-2.01012	0.383927	-5.2357	1.64362e-07	6.80066e-06	FALSE	1046.76	1054.11	1114.07	967.266	289.748	266.749	186.193	295.52
ENSDARG00000087805	78.6773	-1.32317	0.252838	-5.23329	1.66522e-07	6.87872e-06	FALSE	123.653	112.208	155.141	122.045	49.262	62.4726	40.2803	53.0941
ENSDARG00000040815	553.396	-0.551995	0.105725	-5.22105	1.77914e-07	7.33719e-06	FALSE	627.594	668.82	683.749	640.601	472.988	443.202	440.731	431.117
ENSDARG00000101160	74.5712	-1.44641	0.277103	-5.21977	1.79142e-07	7.37572e-06	FALSE	95.678	112.177	132.854	117.113	31.1065	42.7052	39.5547	55.6299
ENSDARG00000089296	1079.51	0.655061	0.125525	5.21855	1.80328e-07	7.41236e-06	FALSE	648.129	804.615	594.426	748.729	1161.9	1062.69	1078.44	1102.68
ENSDARG00000104569	76.2818	-2.00552	0.384493	-5.21601	1.8282e-07	7.50252e-06	FALSE	171.283	153.156	158.487	116.862	52.6212	31.2783	23.1601	41.9761
ENSDARG00000086849	133.802	1.0818	0.207456	5.21459	1.84226e-07	7.53554e-06	FALSE	80.3439	81.4694	58.2145	57.867	122.914	139.317	131.264	190.971
ENSDARG00000090560	63.3313	-1.46255	0.280465	-5.21475	1.84068e-07	7.53554e-06	FALSE	92.8118	100.415	130.356	94.899	31.1848	24.1982	55.2154	42.0366
ENSDARG00000006169	1092.67	0.599934	0.115062	5.214	1.84816e-07	7.53979e-06	FALSE	741.143	776.659	765.39	842.408	1195.53	1184.74	1080.38	1280.57
ENSDARG00000054319	906.837	-0.912422	0.175009	-5.21358	1.85232e-07	7.53979e-06	FALSE	1204.13	1373.67	1589.07	1545.87	786.645	705.824	780.515	763.677
ENSDARG00000016319	1737.75	-0.982323	0.188406	-5.21385	1.84962e-07	7.53979e-06	FALSE	2495.03	2461.07	2934.59	2862.56	1328.77	1440.96	1290.26	1383.68
ENSDARG00000102087	96.2693	-1.22117	0.234553	-5.20638	1.92565e-07	7.82557e-06	FALSE	130.157	196.08	200.702	129.425	59.4234	80.74	74.6543	67.3605
ENSDARG00000088079	61.7997	-1.47762	0.284076	-5.20149	1.97694e-07	8.02099e-06	FALSE	85.4667	143.158	120.408	118.618	24.5658	54.4119	44.6108	45.3322
ENSDARG00000100221	28.8166	-3.9454	0.75972	-5.19324	2.06671e-07	8.37166e-06	FALSE	72.5715	58.6757	13.5817	61.3345	2.72153	1.14633	4.77717	5.61452
ENSDARG00000038297	86.4198	-1.04767	0.201775	-5.19227	2.07745e-07	8.40161e-06	FALSE	110.251	107.989	125.748	117.293	58.9036	58.4574	56.0617	49.7715
ENSDARG00000102977	1207.77	-0.567551	0.109384	-5.18859	2.11887e-07	8.54047e-06	FALSE	1415.22	1520.94	1604.15	1579.57	954.729	1002.33	1047.79	1127.93
ENSDARG00000100955	360.497	-0.816702	0.157403	-5.18859	2.11891e-07	8.54047e-06	FALSE	436.922	448.628	573.111	440.961	237.441	255.61	254.294	333.052
ENSDARG00000090840	39.6771	-1.42267	0.274206	-5.18832	2.122e-07	8.54047e-06	FALSE	70.5888	71.475	79.2256	57.423	26.656	22.1045	26.8489	28.3123
ENSDARG00000057706	433.274	-0.710378	0.13707	-5.1826	2.18812e-07	8.79244e-06	FALSE	479.405	578.349	536.324	424.791	286.716	331.568	301.621	314.136
ENSDARG00000075931	977.066	-1.12792	0.217685	-5.18142	2.20204e-07	8.83423e-06	FALSE	1186.61	1360.67	1601.51	1572.83	614.573	672.317	544.089	788.377
ENSDARG00000029011	1331.95	-0.586641	0.113321	-5.17682	2.25698e-07	9.04019e-06	FALSE	1432.51	1548.24	1674.67	1528.65	978.959	1076.23	967.609	1097.28
ENSDARG00000059202	433.765	0.625888	0.12097	5.17391	2.29246e-07	9.16764e-06	FALSE	321.572	301.147	313.124	298.538	433.591	460.278	457.12	553.15
ENSDARG00000076426	256.888	-0.647739	0.125223	-5.17268	2.30754e-07	9.21326e-06	FALSE	275.123	319.9	327.478	356.037	204.799	172.786	219.634	222.734
ENSDARG00000096908	185.693	-0.851072	0.164551	-5.17208	2.31499e-07	9.22831e-06	FALSE	262.512	269.702	279.234	238.626	187.915	148.252	111.817	132.629
ENSDARG00000062013	264.304	0.605543	0.117134	5.16968	2.34497e-07	9.33299e-06	FALSE	219.879	218.963	179.532	187.537	322.475	285.932	312.834	298.847
ENSDARG00000042620	3409.3	-0.339675	0.0657138	-5.169	2.35353e-07	9.35219e-06	FALSE	3728.12	3746.19	3912.74	4402.91	3041.65	3059.98	3245.54	3138.4
ENSDARG00000092532	74.674	-2.11879	0.409948	-5.16845	2.36049e-07	9.36502e-06	FALSE	173.811	165.608	136.316	155.903	33.1079	44.3349	12.7345	55.2977
ENSDARG00000010420	1183.72	0.726338	0.140667	5.16354	2.42327e-07	9.59107e-06	FALSE	592.952	556.4	615.445	549.628	780.034	1063.11	990.003	995.629
ENSDARG00000042953	761.649	-1.91162	0.370226	-5.16339	2.42512e-07	9.59107e-06	FALSE	1140.41	1286.57	1592.32	1488.63	345.939	381.647	333.778	402.863
ENSDARG00000075766	174.085	-0.829517	0.160715	-5.16141	2.45103e-07	9.67829e-06	FALSE	207.348	254.098	255.362	238.614	136.454	136.302	123.855	142.382
ENSDARG00000036942	916.016	-0.545106	0.105641	-5.15997	2.46986e-07	9.73732e-06	FALSE	1087.57	1042.17	1146.1	1108.64	763.902	733.757	725.392	782.757
ENSDARG00000104108	1496.97	-0.748586	0.145227	-5.15461	2.54165e-07	1.00046e-05	FALSE	1943.35	2056.26	2068.57	2149.97	1205.35	1095.8	1322.77	1268.81
ENSDARG00000022165	1400.6	-0.650813	0.126368	-5.15013	2.60307e-07	1.02303e-05	FALSE	1604.62	1526.28	1699.7	1772.68	962.571	1149.27	919.459	1176.21
ENSDARG00000093518	12.6793	-3.09763	0.601574	-5.14921	2.61581e-07	1.02643e-05	FALSE	42.4101	19.2867	15.8186	37.1075	4.79231	3.02776	3.15436	2.20853
ENSDARG00000056877	2760.35	0.392793	0.0762877	5.14883	2.62111e-07	1.0269e-05	FALSE	2139.06	2483.47	2337.51	2650.71	3224.21	3245.54	3031.96	3129.23
ENSDARG00000055416	992.989	-0.774692	0.150551	-5.14569	2.66533e-07	1.0426e-05	FALSE	1130.77	1196.71	1292.84	1204.03	675.389	705.416	634.234	806.187
ENSDARG00000074852	528.631	-0.735002	0.143064	-5.13759	2.78284e-07	1.08687e-05	FALSE	669.557	762.996	704.041	817.046	399.608	532.402	364.998	481.123
ENSDARG00000054588	211.325	-1.19224	0.232119	-5.13635	2.80124e-07	1.09235e-05	FALSE	251.576	310.038	345.952	310.716	123.568	104.28	148.426	158.223
ENSDARG00000043587	419.876	-0.998532	0.19445	-5.13515	2.81922e-07	1.09766e-05	FALSE	561.73	651.891	650.05	734.872	304.639	336.735	299.907	360.593
ENSDARG00000087937	825.245	-0.508052	0.0989475	-5.13456	2.82805e-07	1.09939e-05	FALSE	1082.41	1031.65	1126.62	999.87	746.369	874.196	676.131	682.93
ENSDARG00000088274	9.80448	-4.10293	0.799285	-5.13325	2.84784e-07	1.10537e-05	FALSE	38.9292	27.5993	23.1976	20.4426	0	1.03916	4.30314	1.13406
ENSDARG00000045411	362.409	-0.746972	0.145553	-5.13195	2.86749e-07	1.1096e-05	FALSE	500.957	513.759	509.439	525.653	291.917	317.049	310.794	302.062
ENSDARG00000014854	141.058	1.23353	0.240362	5.13195	2.8676e-07	1.1096e-05	FALSE	55.341	95.2447	70.3435	94.3473	214.484	147.804	170.201	214.546
ENSDARG00000074813	70.2769	-1.20174	0.234233	-5.1305	2.88969e-07	1.11643e-05	FALSE	99.2688	112.599	105.455	99.4001	49.0207	44.4239	26.2331	61.8017
ENSDARG00000088581	396.52	-0.85812	0.167458	-5.12439	2.98499e-07	1.15147e-05	FALSE	503.593	619.591	563.914	495.51	301.215	308.586	278.838	315.333
ENSDARG00000101393	460.647	-0.685295	0.133763	-5.12321	3.0038e-07	1.15431e-05	FALSE	579.293	576.941	650.97	541.235	368.351	371.741	379.588	340.459
ENSDARG00000095633	538.824	-1.03006	0.201064	-5.12306	3.00617e-07	1.15431e-05	FALSE	614.716	806.368	895.465	856.671	380.024	384.5	337.421	453.646
ENSDARG00000092898	106.634	-1.17165	0.228677	-5.1236	2.99752e-07	1.15431e-05	FALSE	143.676	140.611	193.078	168.377	70.9337	79.5943	82.3842	54.0544
ENSDARG00000053831	636.615	-0.871586	0.17022	-5.12036	3.04948e-07	1.16915e-05	FALSE	884.073	926.065	1039.53	932.433	449.551	571.934	460.949	585.868
ENSDARG00000059700	161.854	-0.790307	0.154358	-5.11997	3.05582e-07	1.1698e-05	FALSE	209.742	244.33	214.548	264.886	119.892	145.201	141.929	134.535
ENSDARG00000089354	874.557	0.468706	0.0915568	5.1193	3.06678e-07	1.1722e-05	FALSE	691.031	672.669	638.05	659.775	854.674	966.626	880.059	979.619
ENSDARG00000102442	259.996	-1.46467	0.28616	-5.11837	3.08184e-07	1.17617e-05	FALSE	304.716	409.291	473.429	463.59	149.681	146.105	125.081	178.086
ENSDARG00000102701	347.28	0.542749	0.106068	5.117	3.1044e-07	1.18118e-05	FALSE	256.353	225.054	270.464	249.659	361.794	382.828	359.221	354.746
ENSDARG00000096505	61.2662	-1.53551	0.300072	-5.11712	3.10232e-07	1.18118e-05	FALSE	104.677	103.624	106.494	108.72	35.8422	31.2424	37.2281	41.9963
ENSDARG00000055278	984.614	-0.973035	0.190205	-5.11573	3.12537e-07	1.18556e-05	FALSE	931.55	1006.33	1011.58	1108.32	453.859	454.53	591.923	568.129
ENSDARG00000101885	11.0881	-4.09144	0.799736	-5.11599	3.121e-07	1.18556e-05	FALSE	32.462	39.5514	10.0709	41.2353	1.87941	0	2.13296	3.31096
ENSDARG00000097008	11318.5	0.654397	0.127968	5.11374	3.15837e-07	1.19627e-05	FALSE	10988.7	10292.3	9186.01	8446.64	15025.2	12872.3	17314	16029.9
ENSDARG00000089177	164.983	-0.904479	0.176999	-5.11008	3.2202e-07	1.21785e-05	FALSE	242.373	232.663	302.644	215.099	123.979	115.102	137.487	154.519
ENSDARG00000007302	329.829	-0.633596	0.124066	-5.10692	3.27446e-07	1.2365e-05	FALSE	407.469	394.103	416.663	384.649	244.867	270.868	261.468	255.92
ENSDARG00000062756	403.689	-0.582106	0.114083	-5.1025	3.35197e-07	1.26197e-05	FALSE	423.477	579.825	495.73	519.505	343.213	369.484	318.092	320.436
ENSDARG00000001870	6165.73	-0.868604	0.170231	-5.10251	3.35185e-07	1.26197e-05	FALSE	7163.82	7951.39	8625.8	8024.96	4783.37	4513.11	3715.98	4385.6
ENSDARG00000090830	1205.24	0.549367	0.107731	5.09945	3.40648e-07	1.28057e-05	FALSE	964.58	989.605	979.562	1012.74	1580.17	1325.42	1473.87	1396.86
ENSDARG00000060350	1867.1	-1.3834	0.271387	-5.09751	3.44142e-07	1.29177e-05	FALSE	2418.46	3800.61	4019.72	3278.94	1161.85	1663.38	1145.71	1211.13
ENSDARG00000071024	420.673	2.07101	0.406312	5.09711	3.44883e-07	1.29262e-05	FALSE	218.294	71.8515	70.3596	153.22	471.047	659.592	399.481	621.364
ENSDARG00000096990	198.164	-0.91113	0.178839	-5.09469	3.49309e-07	1.30725e-05	FALSE	297.665	236.773	305.577	280.43	131.021	193.945	131.857	139.413
ENSDARG00000035882	526.083	-0.536569	0.105332	-5.09408	3.50445e-07	1.30955e-05	FALSE	570.199	600.237	662.92	724.12	429.798	469.887	422.399	445.56
ENSDARG00000054931	1640.8	0.471763	0.0926251	5.09326	3.51966e-07	1.31327e-05	FALSE	1286.17	1219.17	1297.65	1469.14	1828.66	1774.06	1755.21	1958.69
ENSDARG00000079946	457.98	-0.954207	0.18736	-5.0929	3.52622e-07	1.31377e-05	FALSE	445.86	609.509	397.768	439.331	223.758	213.152	272.224	268.024
ENSDARG00000023820	1413.66	-1.7126	0.336782	-5.08519	3.67263e-07	1.36628e-05	FALSE	2126.81	1762.26	2650.34	2630.53	709.436	722.085	471.777	894.841
ENSDARG00000093492	42.9496	1.72413	0.339228	5.08251	3.72484e-07	1.38366e-05	FALSE	18.6127	29.0363	13.7028	16.3121	62.0755	54.0937	80.0687	59.8129
ENSDARG00000104807	209.525	0.951134	0.187203	5.08076	3.75926e-07	1.39437e-05	FALSE	123.568	132.761	150.279	155.296	261.672	272.342	271.733	284.24
ENSDARG00000074628	125.737	-1.29826	0.255617	-5.07894	3.79554e-07	1.40575e-05	FALSE	126.873	161.501	181.222	157.207	65.5795	50.175	90.4625	49.4685
ENSDARG00000042962	574.638	0.559375	0.110191	5.07644	3.84582e-07	1.42227e-05	FALSE	372.231	363.005	403.134	377.289	528.476	556.913	545.235	605.13
ENSDARG00000003113	3726.86	-0.79869	0.157893	-5.05843	4.22716e-07	1.561e-05	FALSE	3929.74	4227.72	4971.47	4801.58	2414.82	2575.52	2599.91	2719.5
ENSDARG00000074282	611.733	-0.568396	0.112388	-5.05745	4.24897e-07	1.56674e-05	FALSE	615.31	827.9	879.332	844.035	507.789	500.26	567.441	566.628
ENSDARG00000022767	14992.5	-1.35232	0.267661	-5.05235	4.36417e-07	1.60686e-05	FALSE	20076.4	20279.7	25566.9	22910.8	7893.88	9337.91	6803.18	10758.5
ENSDARG00000014138	108.606	-1.0849	0.21477	-5.05143	4.38521e-07	1.61224e-05	FALSE	156.485	156.434	150.288	139.385	65.1707	72.6654	85.1719	60.7355
ENSDARG00000042544	428.775	-0.569818	0.112881	-5.04797	4.4654e-07	1.63692e-05	FALSE	563.709	551.053	489.148	474.572	346.823	353.365	352.724	344.38
ENSDARG00000091087	157.972	0.894076	0.177107	5.04822	4.45939e-07	1.63692e-05	FALSE	106.489	102.967	79.7198	92.1108	192.513	144.416	171.94	196.403
ENSDARG00000030782	821.721	-0.622655	0.123447	-5.0439	4.56128e-07	1.66963e-05	FALSE	992.364	1250.73	1066.74	930.415	687.03	798.582	647.195	620.263
ENSDARG00000035519	14473.7	0.763075	0.151306	5.04326	4.57661e-07	1.6728e-05	FALSE	6427.54	7357.85	10142.9	9051.83	12886.1	14638.5	13848.6	14607.2
ENSDARG00000043663	461.145	-0.571659	0.113369	-5.04248	4.59526e-07	1.67717e-05	FALSE	510.867	570.627	617.731	484.636	361.786	370.801	386.977	350.639
ENSDARG00000077717	9707.68	0.271008	0.0537946	5.03784	4.70826e-07	1.71592e-05	FALSE	7991.8	7664.64	7424.71	7949.27	9332.55	9376.9	9207.13	9521.67
ENSDARG00000061177	192.823	-0.774598	0.153853	-5.03467	4.78684e-07	1.74202e-05	FALSE	224.252	257.602	288.438	242.54	155.44	142.46	118.231	177.545
ENSDARG00000095807	410.263	-1.25142	0.248595	-5.03399	4.80376e-07	1.74564e-05	FALSE	584.423	596.737	781.451	854.58	292.991	339.327	289.351	262.238
ENSDARG00000101979	532.169	-0.814266	0.162014	-5.02591	5.01044e-07	1.81812e-05	FALSE	604.164	666.885	673.403	582.08	357.657	400.744	349.745	328.555
ENSDARG00000086420	18.7922	5.76787	1.14884	5.02062	5.15048e-07	1.86623e-05	FALSE	0	0	0	0.902713	30.905	6.06707	15.7145	18.7659
ENSDARG00000031616	224.315	-1.12613	0.224338	-5.01981	5.17238e-07	1.87146e-05	FALSE	311.539	399.772	354.57	309.659	124.026	156.801	143.288	207.492
ENSDARG00000034705	2733.83	-0.58004	0.115577	-5.01863	5.20403e-07	1.8802e-05	FALSE	3176.89	3428.35	3789.76	3537.37	2162.35	2320.07	2359.21	2481.69
ENSDARG00000079286	1493.46	0.296948	0.0592361	5.01295	5.36005e-07	1.93378e-05	FALSE	1272.89	1248.79	1241.8	1315.23	1583.14	1494.69	1582.28	1580.86
ENSDARG00000076485	268.456	-0.789512	0.157522	-5.01207	5.38465e-07	1.93987e-05	FALSE	354.852	415.598	343.566	406.174	259.312	210.222	200.591	209.439
ENSDARG00000093478	22.2411	-1.83044	0.365254	-5.01143	5.40284e-07	1.94363e-05	FALSE	51.1801	42.8608	47.4482	38.0096	13.4205	12.1113	15.7702	8.83389
ENSDARG00000100782	210.527	-1.04914	0.210034	-4.9951	5.88045e-07	2.11241e-05	FALSE	246.804	334.32	303.593	351.815	147.291	154.235	127.853	169.469
ENSDARG00000071143	26.0672	7.81092	1.56406	4.994	5.91404e-07	2.12144e-05	FALSE	0	0	0	0	39.0513	56.9483	23.6021	59.1201
ENSDARG00000062485	941.08	0.445372	0.0891885	4.9936	5.92643e-07	2.12285e-05	FALSE	781.065	771.28	833.893	812.854	1147.65	999.732	1150.93	1060.06
ENSDARG00000069313	885.783	-0.612525	0.122734	-4.99067	6.01717e-07	2.15228e-05	FALSE	1137.46	1048.02	1087.99	1029.71	721.092	772.132	708.461	610.607
ENSDARG00000058053	91.7038	-1.31121	0.26298	-4.98598	6.16478e-07	2.20193e-05	FALSE	118.981	117.634	153.116	167.005	49.2601	49.7886	49.2583	76.3778
ENSDARG00000102305	691.465	0.465704	0.0935193	4.97976	6.36623e-07	2.27065e-05	FALSE	556.259	540.108	535.458	559.986	748.458	726.076	745.878	806.671
ENSDARG00000090286	3573.93	-1.37547	0.276246	-4.97916	6.38619e-07	2.27454e-05	FALSE	4957.15	5739.65	7317.01	7280.77	2315.73	2334.15	2385.37	2714.76
ENSDARG00000036966	676.408	-0.599412	0.120485	-4.97498	6.52548e-07	2.32085e-05	FALSE	798.49	800.443	867.96	897.456	593.151	569.952	489.128	569.567
ENSDARG00000029388	105.851	-1.13903	0.229313	-4.96716	6.79409e-07	2.41296e-05	FALSE	155.357	130.603	176.683	172.297	51.5638	67.5814	92.7629	77.3522
ENSDARG00000090428	3441.29	-1.93211	0.389028	-4.96651	6.81689e-07	2.41763e-05	FALSE	5184.82	7772.03	7769.89	6117.06	1566.44	2371.37	1398.48	1698.12
ENSDARG00000097737	30.7447	2.43789	0.490924	4.96593	6.83739e-07	2.42148e-05	FALSE	5.89794	5.34144	14.0695	10.9665	69.7711	60.4732	26.5983	43.0956
ENSDARG00000100417	21.3443	3.89944	0.785452	4.96458	6.88496e-07	2.43489e-05	FALSE	1.45583	1.07376	4.90247	0	41.5556	11.1175	35.5629	23.1596
ENSDARG00000074626	125.122	-0.840935	0.169398	-4.96426	6.89642e-07	2.4355e-05	FALSE	158.774	198.543	194.365	207.434	127.372	92.9452	115.134	89.333
ENSDARG00000005191	12873.1	-0.415943	0.0838328	-4.96158	6.99219e-07	2.46585e-05	FALSE	15318.2	14612.1	15693.9	14994.8	11143.6	11679.6	10801.6	11810.9
ENSDARG00000074490	1035.13	-1.08664	0.219251	-4.95615	7.19042e-07	2.53037e-05	FALSE	1388.86	1357.91	1387.62	1487.37	700.254	782.063	652.702	511.643
ENSDARG00000101190	97.2444	1.53451	0.309627	4.95602	7.19531e-07	2.53037e-05	FALSE	23.3529	33.2424	22.6591	21.6838	97.1275	47.4587	73.4361	73.94
ENSDARG00000056167	2906.11	-0.373816	0.0754446	-4.95484	7.23882e-07	2.5421e-05	FALSE	3397.89	3758.3	3536.55	3220.88	2552.53	2695.99	2941.83	2548.12
ENSDARG00000013333	4119.61	-0.342313	0.069197	-4.94694	7.53905e-07	2.64384e-05	FALSE	4793.7	4508.6	4662.44	4719.28	3527.11	3780.77	3723.09	3705.76
ENSDARG00000026663	33.1814	1.79839	0.363603	4.94603	7.57433e-07	2.6525e-05	FALSE	10.2026	12.8754	23.5845	9.02365	56.8739	47.4757	50.2747	40.8142
ENSDARG00000102095	173.848	1.26573	0.256013	4.94399	7.65389e-07	2.67662e-05	FALSE	137.011	64.3759	62.896	112.799	194.709	222.225	274.427	209.589
ENSDARG00000012903	440.643	-1.04768	0.212059	-4.94052	7.79163e-07	2.72099e-05	FALSE	565.453	603.022	665.153	848.143	289.242	313.146	299.517	397.098
ENSDARG00000053774	257.546	-1.34054	0.271581	-4.93607	7.97127e-07	2.77986e-05	FALSE	440.843	374.28	439.867	534.905	207.796	224.973	160.589	112.897
ENSDARG00000068738	183.892	-1.07041	0.216975	-4.93332	8.08425e-07	2.81534e-05	FALSE	282.314	300.738	236.459	277.413	121.828	134.337	111.056	155.211
ENSDARG00000009430	401.636	-0.771166	0.156378	-4.93141	8.16391e-07	2.83914e-05	FALSE	464.079	532.581	512.228	495.48	297.847	273.872	290.55	313.089
ENSDARG00000094195	23.0103	-6.13723	1.24601	-4.92552	8.41352e-07	2.92189e-05	FALSE	52.8099	39.5373	34.8262	19.0562	0	0	0	2.20912
ENSDARG00000038910	1992.77	-0.360523	0.0733474	-4.91528	8.86543e-07	3.07458e-05	FALSE	2381.26	2373.5	2257.15	2293.54	1724.38	1919.19	1713.17	1889.93
ENSDARG00000037425	1810.39	-0.672969	0.136936	-4.91448	8.90202e-07	3.083e-05	FALSE	2122.43	2295.53	2340.39	2120.83	1220.54	1385.52	1410.53	1554.13
ENSDARG00000058327	236.52	-1.10974	0.225943	-4.91159	9.03406e-07	3.12441e-05	FALSE	231.886	358.593	413.158	335.728	103.625	154.312	176.81	188.09
ENSDARG00000044751	2041.15	-0.372805	0.076004	-4.90507	9.33962e-07	3.22564e-05	FALSE	2121.8	2294.89	2502.23	2456.17	1746.1	1863.5	1903.39	1734.29
ENSDARG00000042853	2528.88	-0.41038	0.0837108	-4.90235	9.46956e-07	3.26602e-05	FALSE	2839.07	2811.66	3191.09	3022.86	2139.23	2410.05	2119.04	2262.13
ENSDARG00000004262	164.801	-0.981511	0.200474	-4.89595	9.78332e-07	3.3696e-05	FALSE	160.965	245.354	208.532	320.669	118.425	114.687	134.044	108.673
ENSDARG00000068006	103.414	-4.11947	0.844498	-4.878	1.07165e-06	3.68593e-05	FALSE	138.4	717.639	73.7207	63.1302	9.61186	15.1278	11.5176	20.9362
ENSDARG00000021339	3288.16	-1.47968	0.303408	-4.87684	1.07796e-06	3.70258e-05	FALSE	4192.64	6482.97	6220.25	5533.12	1656.22	2585.02	1689.57	2112.04
ENSDARG00000045827	24.923	-2.5812	0.529365	-4.87604	1.08239e-06	3.71269e-05	FALSE	62.9631	56.7593	44.591	39.8671	5.73847	6.05354	18.9537	3.31411
ENSDARG00000039116	130.355	-1.232	0.252813	-4.87316	1.09826e-06	3.76198e-05	FALSE	157.519	150.763	218.975	196.816	79.0534	78.3452	53.3173	98.6779
ENSDARG00000101018	1332.63	0.320608	0.0657979	4.87262	1.10126e-06	3.76199e-05	FALSE	1169.29	1183.42	1124.72	1215.85	1564.52	1440.21	1492.98	1362.47
ENSDARG00000056196	546.126	-0.852222	0.174893	-4.87282	1.10016e-06	3.76199e-05	FALSE	646.194	754.27	806.389	901.013	426.497	460.776	390.254	445.744
ENSDARG00000101726	630.978	-0.961897	0.197443	-4.87176	1.10609e-06	3.76438e-05	FALSE	909.019	941.168	897.351	821.681	542.222	416.224	392.539	480.867
ENSDARG00000102641	79.1346	-1.9466	0.399595	-4.87142	1.10797e-06	3.76438e-05	FALSE	116.792	145.384	120.848	148.639	34.9839	35.6092	52.7514	14.4089
ENSDARG00000101970	23.8221	2.14088	0.439426	4.87198	1.10486e-06	3.76438e-05	FALSE	5.8917	8.54764	4.00903	13.675	33.1104	37.2813	41.3847	33.1793
ENSDARG00000068915	12.1073	6.91369	1.41922	4.87149	1.10761e-06	3.76438e-05	FALSE	0	0	0	0	18.0001	13.8974	38.0816	26.0161
ENSDARG00000037517	1388.83	-0.452397	0.0929349	-4.8679	1.12792e-06	3.827e-05	FALSE	1531.88	1908.74	1672.52	1632.23	1163.93	1298.29	1222.26	1246.84
ENSDARG00000017882	456.436	-1.07485	0.22084	-4.8671	1.1325e-06	3.83734e-05	FALSE	578.262	572.516	734.591	704.119	288.262	316.016	276.062	349.889
ENSDARG00000031848	165.202	-0.98919	0.203301	-4.86565	1.14081e-06	3.86029e-05	FALSE	231.249	297.773	229.705	193.822	122.514	107.967	119.978	129.232
ENSDARG00000097211	85.7638	-1.03587	0.213061	-4.86185	1.16292e-06	3.9298e-05	FALSE	119.715	144.497	114.166	123.996	47.4462	61.6192	56.5943	80.3633
ENSDARG00000007480	8060.91	0.491323	0.101114	4.85909	1.17926e-06	3.97963e-05	FALSE	7591.13	6975.52	7151.4	7156.89	9972.87	9651.42	10456	10507.5
ENSDARG00000102590	466.998	0.44081	0.090731	4.85843	1.18321e-06	3.98762e-05	FALSE	381.581	385.848	378.034	428.8	499.987	578.013	547.78	514.996
ENSDARG00000023583	1095.94	-0.446104	0.0918596	-4.85636	1.19561e-06	4.024e-05	FALSE	1283.52	1251.1	1355.35	1345.84	948.597	945.482	1001.87	948.795
ENSDARG00000078757	1395.55	-1.41963	0.292633	-4.85123	1.22696e-06	4.12398e-05	FALSE	1667.72	2124.68	2444.03	2751.14	848.597	901.382	696.32	914.005
ENSDARG00000088493	107.835	3.31607	0.684161	4.84692	1.2539e-06	4.20888e-05	FALSE	3.47112	2.56277	28.83	8.6123	88.8392	44.0171	171.637	119.777
ENSDARG00000095302	83.807	1.59438	0.329047	4.84544	1.26331e-06	4.2348e-05	FALSE	27.2923	22.8283	48.124	29.1383	54.4639	114.853	130.903	89.9817
ENSDARG00000010385	396.162	0.54836	0.113303	4.83976	1.29994e-06	4.34016e-05	FALSE	357.707	269.121	301.639	316.312	491.139	421.036	473.313	428.233
ENSDARG00000093386	80.6645	1.31597	0.271891	4.84006	1.29799e-06	4.34016e-05	FALSE	40.8103	56.46	24.0163	48.6043	100.023	79.1005	96.6312	151.695
ENSDARG00000100315	217.94	-1.45164	0.299932	-4.83991	1.29899e-06	4.34016e-05	FALSE	235.001	338.938	437.025	386.158	113.905	166.622	96.9884	134.028
ENSDARG00000036993	368.274	-0.587942	0.121507	-4.83876	1.30652e-06	4.34905e-05	FALSE	449.199	433.886	414.95	479.398	279.468	296.042	302.075	305.53
ENSDARG00000088408	24.0982	2.16908	0.44829	4.83856	1.3078e-06	4.34905e-05	FALSE	10.2052	13.9469	3.93257	2.70771	25.0521	31.3117	41.908	35.3017
ENSDARG00000093224	16.0688	-5.35153	1.1059	-4.83907	1.30445e-06	4.34905e-05	FALSE	55.7112	42.7568	10.9333	19.9534	0	0	0	3.31321
ENSDARG00000091627	48.6131	-2.30166	0.475746	-4.83801	1.31145e-06	4.35405e-05	FALSE	137.564	156.026	49.6955	80.0463	17.1818	23.2817	30.9995	14.2431
ENSDARG00000070526	6.88854	-6.28549	1.29924	-4.83781	1.31278e-06	4.35405e-05	FALSE	13.123	20.3493	15.7494	9.92838	0	0	0	0
ENSDARG00000042124	362.743	-0.747174	0.154577	-4.83366	1.34042e-06	4.43986e-05	FALSE	427.577	453.335	537.532	512.372	293.722	291.873	274.027	292.35
ENSDARG00000092534	159.886	-0.744034	0.154027	-4.83054	1.36163e-06	4.50416e-05	FALSE	192.536	227.777	241.718	199.868	126.656	133.248	127.459	128.383
ENSDARG00000087793	272.852	0.967249	0.200267	4.82979	1.36676e-06	4.50922e-05	FALSE	154.133	164.995	151.181	163.089	308.438	198.057	412.339	322.343
ENSDARG00000090572	8.9162	-6.90142	1.42885	-4.83004	1.36507e-06	4.50922e-05	FALSE	23.4962	28.8017	22.9534	15.444	0	0	0	0
ENSDARG00000096214	551.801	0.48182	0.0999482	4.8207	1.43054e-06	4.71344e-05	FALSE	506.989	442.709	434.864	456.299	723.401	552.37	657.677	630.39
ENSDARG00000079878	131.648	0.8827	0.183185	4.81862	1.44556e-06	4.75668e-05	FALSE	90.4551	80.4387	96.4754	98.4444	200.166	143.401	179.308	152.274
ENSDARG00000070558	108.07	-1.11951	0.232355	-4.81809	1.44937e-06	4.76297e-05	FALSE	149.6	164.132	162.999	111.1	48.2499	65.7357	68.812	88.2312
ENSDARG00000005897	370.265	-0.566456	0.117677	-4.81363	1.48212e-06	4.86423e-05	FALSE	523.741	474.594	503.568	448.154	348.658	341.095	300.846	323.588
ENSDARG00000103725	378.453	0.572195	0.118877	4.81332	1.4844e-06	4.86533e-05	FALSE	328.703	317.862	337.746	297.223	459.534	481.074	461.824	501.565
ENSDARG00000052905	1790.28	-0.461745	0.0959482	-4.81244	1.49097e-06	4.88049e-05	FALSE	2081.77	2644.9	2495.23	2248.72	1645.81	1802.65	1541.29	1891.24
ENSDARG00000038006	190.717	-0.856786	0.178206	-4.80783	1.52579e-06	4.98712e-05	FALSE	266.48	263.455	288.326	254.593	152.084	133.18	125.297	182.273
ENSDARG00000095461	5.17933	-6.36636	1.32423	-4.8076	1.52752e-06	4.98712e-05	FALSE	8.7303	13.7341	10.8808	28.8068	0	0	0	0
ENSDARG00000102067	91.6134	1.14802	0.239106	4.80131	1.57634e-06	5.13981e-05	FALSE	45.0981	56.9096	45.1156	67.56	140.107	128.328	112.885	97.0591
ENSDARG00000025350	8094.36	-0.391122	0.0815911	-4.79368	1.63749e-06	5.33227e-05	FALSE	9095.53	8756.15	9642.1	9314.24	6661.91	7327.15	7046.5	7033.61
ENSDARG00000031438	205.265	-0.996979	0.208027	-4.79254	1.64681e-06	5.35565e-05	FALSE	252.306	272.365	280.281	366.389	126.391	170.88	172.47	117.819
ENSDARG00000105287	2750.18	-0.692771	0.144586	-4.79141	1.65615e-06	5.37906e-05	FALSE	2655.27	2834.14	2888.89	2868.14	1717.79	1713.16	1665.11	1862.83
ENSDARG00000104213	186.055	-0.968248	0.20216	-4.7895	1.67196e-06	5.42338e-05	FALSE	236.575	285.179	217.935	245.867	124.901	110.049	106.023	163.358
ENSDARG00000078423	81.2826	-1.04931	0.219168	-4.78771	1.68695e-06	5.46495e-05	FALSE	135.279	90.8718	96.8585	114.6	38.9318	58.4542	57.1415	56.4113
ENSDARG00000019772	70.0501	-1.1201	0.234109	-4.78451	1.71406e-06	5.54559e-05	FALSE	80.9096	94.0657	111.003	107.687	40.3859	58.332	51.0014	32.2323
ENSDARG00000024717	618.874	-0.591731	0.123689	-4.78401	1.71836e-06	5.55234e-05	FALSE	868.824	808.395	880.469	800.81	548.691	553.286	529.011	597.122
ENSDARG00000075425	56.7251	-1.38399	0.289328	-4.78346	1.72307e-06	5.5604e-05	FALSE	63.0028	76.0164	79.3633	95.1906	21.974	36.3153	27.3974	35.3576
ENSDARG00000059993	769.497	-0.477694	0.099895	-4.78196	1.73593e-06	5.58862e-05	FALSE	916.486	962.096	900.993	801.751	669.23	680.139	618.699	600.816
ENSDARG00000101214	100.062	1.01795	0.212874	4.78192	1.73628e-06	5.58862e-05	FALSE	64.6157	44.2967	62.7087	69.9654	125.834	124.569	114.845	121.155
ENSDARG00000040282	16.03	-3.14705	0.658853	-4.77655	1.78324e-06	5.73244e-05	FALSE	45.6615	65.1754	13.0298	31.9091	0.945976	8.06085	6.36705	2.21193
ENSDARG00000026348	292.1	-0.498126	0.104384	-4.77205	1.8236e-06	5.85468e-05	FALSE	318.154	360.318	366.424	339.685	222.179	253.456	253.852	253.816
ENSDARG00000070138	16.9197	3.26866	0.685468	4.76851	1.85597e-06	5.95098e-05	FALSE	0	6.90374	0	3.47658	22.8815	13.5045	23.2265	43.0603
ENSDARG00000062467	72.1134	-1.04637	0.219608	-4.7647	1.89138e-06	6.05676e-05	FALSE	97.4014	117.904	130.629	87.6585	59.8058	48.875	61.4692	40.0628
ENSDARG00000060153	901.21	-0.589719	0.12381	-4.76312	1.90626e-06	6.09663e-05	FALSE	972.798	1209.08	1194.79	1363.96	835.747	661.603	862.635	794.505
ENSDARG00000055078	255.635	-0.701253	0.147262	-4.76195	1.91729e-06	6.12226e-05	FALSE	325.49	360.301	411.823	429.168	205.786	237.292	248.641	250.515
ENSDARG00000078349	41.9228	-1.8338	0.385111	-4.76176	1.91916e-06	6.12226e-05	FALSE	45.1048	53.6847	101.883	104.514	29.9711	18.1901	12.5437	25.3569
ENSDARG00000094426	823.739	0.466559	0.0980068	4.76048	1.93135e-06	6.15334e-05	FALSE	629.331	595.134	607.643	590.586	758.363	893.077	870.795	823.343
ENSDARG00000098684	7.68602	5.98146	1.25662	4.75995	1.93644e-06	6.1617e-05	FALSE	0	0	0	0	1.85127	23.136	12.8827	12.5408
ENSDARG00000104737	59.2057	1.29176	0.271432	4.75907	1.9449e-06	6.18078e-05	FALSE	33.5406	39.6904	29.5089	31.5977	84.7518	80.7988	73.3623	89.3652
ENSDARG00000017444	487.368	-0.947472	0.199254	-4.75509	1.98353e-06	6.29558e-05	FALSE	616.646	800.192	748.626	766.206	351.348	326.288	367.739	476.433
ENSDARG00000087017	287.321	-1.33444	0.28077	-4.75277	2.00644e-06	6.36023e-05	FALSE	495.014	640.655	516.235	473.384	173.138	209.683	232.5	227.794
ENSDARG00000104478	1399.12	-0.565646	0.119079	-4.7502	2.03219e-06	6.43374e-05	FALSE	1936.34	1818.48	1590.52	1973.98	1262.5	1198.59	1201.75	1281.57
ENSDARG00000016470	1902.89	-0.403333	0.0849252	-4.74927	2.04148e-06	6.44686e-05	FALSE	2245.35	2277.42	2293.51	2135.41	1671.63	1700.33	1686.35	1709.58
ENSDARG00000020364	2924.44	-1.22492	0.257918	-4.74927	2.04147e-06	6.44686e-05	FALSE	3753.16	3910.43	4687.03	4442.16	1694.02	1725.91	1792.51	1972.44
ENSDARG00000053493	1498.58	-0.555024	0.116952	-4.74573	2.07754e-06	6.55249e-05	FALSE	1663.48	1852.37	1752.54	1574.14	1066.7	1185.2	1283.3	1122.31
ENSDARG00000003219	1111.7	-0.546376	0.115137	-4.74546	2.08035e-06	6.55311e-05	FALSE	1062.76	1412.4	1294.12	1161.75	830.693	884.175	892.352	769.514
ENSDARG00000077353	3575.47	0.307681	0.0649213	4.73929	2.14467e-06	6.74723e-05	FALSE	2972.91	3135.15	3130.3	3058.06	3969.98	3770.98	3538.82	3943.49
ENSDARG00000093279	27.0486	-2.13564	0.450774	-4.73773	2.16128e-06	6.79096e-05	FALSE	45.3418	39.6424	73.1809	48.8799	11.4986	18.1658	3.15491	14.3562
ENSDARG00000068716	828.994	0.37038	0.0781823	4.73739	2.16493e-06	6.79391e-05	FALSE	759.484	659.56	669.533	635.259	869.829	910.276	902.383	826.289
ENSDARG00000013561	3942.73	-0.307497	0.0649383	-4.73522	2.18815e-06	6.8582e-05	FALSE	4449.45	4567.38	4577.73	4645.97	3751.53	3735.26	3721.45	3532.38
ENSDARG00000094809	307.45	-0.877434	0.185316	-4.73481	2.19265e-06	6.86372e-05	FALSE	369.78	415.413	410.585	497.999	237.782	190.77	243.882	251.258
ENSDARG00000056045	225.87	-0.781223	0.165214	-4.72856	2.2612e-06	7.0695e-05	FALSE	261.257	292.672	357.759	301.598	171.84	206.164	159.436	169.852
ENSDARG00000087402	6474.99	-0.367213	0.0776647	-4.72818	2.26542e-06	7.07387e-05	FALSE	7555.43	8167.95	8082.92	7063	5554.14	6387.09	6107.14	5884.14
ENSDARG00000077688	177.411	-1.34183	0.283814	-4.72786	2.26896e-06	7.0761e-05	FALSE	266.01	363.316	361.481	276.81	132.395	121.128	142.905	103.783
ENSDARG00000011555	2824.45	-0.305065	0.0645613	-4.7252	2.29889e-06	7.16054e-05	FALSE	3386.39	3110.39	3197.59	3104.3	2515.43	2693.18	2598.75	2546.46
ENSDARG00000029305	219.137	-0.80805	0.171087	-4.72304	2.32349e-06	7.21924e-05	FALSE	294.749	269.112	302.493	324.765	190.692	167.597	150.985	171.16
ENSDARG00000055739	8.82287	-4.56563	0.966638	-4.72321	2.32157e-06	7.21924e-05	FALSE	27.7708	25.6983	24.7049	18.9958	0	4.03436	0	0
ENSDARG00000103287	753.029	0.814499	0.172491	4.72198	2.33558e-06	7.24783e-05	FALSE	519.075	511.718	517.76	522.94	964.959	681.421	1148.44	848.468
ENSDARG00000053656	4102.67	-0.354821	0.0751671	-4.72043	2.35346e-06	7.29426e-05	FALSE	4992.39	4920.94	4879.12	4951.95	3823.31	3797.62	3932.53	3885.52
ENSDARG00000021172	462.688	-1.66816	0.353556	-4.71824	2.37894e-06	7.36413e-05	FALSE	829.487	510.764	1083.52	1019.69	243.854	267.206	261.962	310.798
ENSDARG00000092870	1461.18	0.82343	0.174603	4.71601	2.40514e-06	7.43606e-05	FALSE	856.708	861.78	826.068	727.457	1339.34	1670.49	1316.5	1461.85
ENSDARG00000040427	78.4236	1.52612	0.323721	4.71431	2.4253e-06	7.48281e-05	FALSE	29.1965	30.0232	41.391	26.2055	100.943	85.8257	79.7472	99.3281
ENSDARG00000102044	13.0497	2.84552	0.603603	4.71423	2.42623e-06	7.48281e-05	FALSE	4.41503	3.21074	3.99691	0	25.6726	19.169	15.8851	17.7149
ENSDARG00000054137	450.081	-0.64672	0.137276	-4.71109	2.46397e-06	7.58986e-05	FALSE	547.968	492.437	616.378	613.493	349.497	419.421	341.807	340.407
ENSDARG00000037266	566.62	-0.459574	0.0976788	-4.70496	2.53922e-06	7.81206e-05	FALSE	741.687	673.856	636.396	649.586	484.356	472.76	506.854	496.42
ENSDARG00000076270	171.937	-0.942496	0.200332	-4.70467	2.5428e-06	7.8135e-05	FALSE	184.781	207.224	294.865	299.122	124.722	143.501	123.344	123.477
ENSDARG00000092299	5.47644	-6.44378	1.37141	-4.69865	2.61892e-06	8.03756e-05	FALSE	11.7577	4.19669	23.7654	25.9974	0	0	0	0
ENSDARG00000054202	119.898	-1.25455	0.267059	-4.69764	2.63188e-06	8.06745e-05	FALSE	133.534	189.387	191.992	198.808	49.5522	60.5015	79.1697	111.65
ENSDARG00000097533	1391.89	-0.899907	0.191743	-4.6933	2.68834e-06	8.23046e-05	FALSE	1819.48	1752.93	1480.03	1657.71	593.82	1092.43	912.16	997.79
ENSDARG00000095005	18.4306	-3.70821	0.790185	-4.69284	2.69436e-06	8.23884e-05	FALSE	45.6225	26.6789	54.1	67.4252	9.44135	4.02592	1.06065	0
ENSDARG00000052578	1066	-2.41503	0.514677	-4.69232	2.70119e-06	8.24966e-05	FALSE	1530.39	2176.87	2360.19	2114	416.079	582.69	251.766	283.401
ENSDARG00000010758	212.58	-1.37331	0.292906	-4.68857	2.75118e-06	8.3921e-05	FALSE	345.358	462.478	438.117	393.359	198.646	176.781	119.374	137.877
ENSDARG00000097608	167.849	-2.79977	0.597706	-4.68419	2.81072e-06	8.56331e-05	FALSE	365.966	226.359	182.898	255.451	26.0111	41.4112	40.8651	39.7157
ENSDARG00000075380	1192.09	0.41633	0.0889567	4.68014	2.86678e-06	8.72351e-05	FALSE	959.795	983.371	979.098	993.813	1384.35	1250.65	1275.77	1317.09
ENSDARG00000006526	7401.09	-0.756581	0.161684	-4.67938	2.87744e-06	8.74532e-05	FALSE	5449.54	6209.02	5799.37	6038.87	3629.88	3753.62	3433.83	3091.32
ENSDARG00000068710	2622.41	-0.441374	0.0943369	-4.6787	2.88701e-06	8.7638e-05	FALSE	2901.03	3067.36	3191.98	3040.45	2121.22	2270.15	2203.01	2393.21
ENSDARG00000003675	433.648	-0.579515	0.123891	-4.67762	2.90225e-06	8.7994e-05	FALSE	499.411	569.736	602.708	531.941	349.929	378.907	340.446	408.007
ENSDARG00000058226	922.259	-0.383229	0.0819705	-4.67521	2.93651e-06	8.89252e-05	FALSE	869.883	1063.76	974.313	964.012	706.838	781.558	750.083	734.982
ENSDARG00000055185	207.478	-1.30219	0.278701	-4.67236	2.97753e-06	9.00586e-05	FALSE	349.24	376.212	345.536	334.637	123.809	143.343	140.766	162.286
ENSDARG00000093963	177.154	-1.20991	0.259408	-4.6641	3.09969e-06	9.35277e-05	FALSE	286.843	210.259	256.94	188.166	100.76	87.4666	100.239	118.264
ENSDARG00000094937	7.74735	-3.97644	0.852532	-4.66427	3.09719e-06	9.35277e-05	FALSE	10.4412	25.7261	17.2271	24.7879	2.77674	2.02181	0	0
ENSDARG00000069192	238.811	-1.28523	0.275782	-4.66031	3.15733e-06	9.51525e-05	FALSE	391.91	358.576	368.705	508.461	154.561	141.343	183.455	189.063
ENSDARG00000041115	155.749	-1.31531	0.282665	-4.65325	3.26744e-06	9.83528e-05	FALSE	259.56	291.698	253.514	222.323	128.03	99.8204	92.666	91.6585
ENSDARG00000003854	1991.03	-0.618746	0.133026	-4.6513	3.29846e-06	9.91673e-05	FALSE	2294.49	2770.97	2572.27	2569.35	1688.65	1638.22	1659.56	1662.49
ENSDARG00000044204	70.8701	-1.05701	0.227271	-4.65087	3.30532e-06	9.92547e-05	FALSE	114.068	98.1261	98.3101	116.759	35.7001	62.1709	55.1331	51.5861
ENSDARG00000079486	109.426	-1.0011	0.215437	-4.64683	3.3707e-06	0.000101097	FALSE	110.545	192.714	148.461	138.881	84.5129	55.7891	75.3911	80.422
ENSDARG00000005565	160.462	-1.45173	0.312503	-4.64548	3.39282e-06	0.000101639	FALSE	276.96	236.037	217.222	235.543	76.1374	92.9284	90.0881	93.766
ENSDARG00000079221	12.3753	-3.12068	0.671862	-4.64483	3.40363e-06	0.000101841	FALSE	26.8339	20.7748	35.7638	27.4786	0	0	9.88408	4.42839
ENSDARG00000074712	24.2103	-2.22025	0.47834	-4.64157	3.45776e-06	0.000103337	FALSE	44.5106	40.9548	57.3289	42.6468	2.81346	3.33886	15.488	18.4152
ENSDARG00000005675	890.101	-0.353544	0.0761952	-4.63998	3.48448e-06	0.000104012	FALSE	1008.56	1094.5	1111.83	997.965	811.76	869.594	843.777	773.044
ENSDARG00000071333	378.531	0.548977	0.118358	4.63828	3.51313e-06	0.000104742	FALSE	320.798	258.645	284.036	261.274	348.896	425.242	452.351	413.694
ENSDARG00000093926	5.9523	-5.7818	1.24685	-4.63711	3.53322e-06	0.000105216	FALSE	26.3705	21.47	11.3303	11.2299	1.027	0	0	0
ENSDARG00000076170	3773.25	0.395952	0.0854117	4.6358	3.55563e-06	0.000105632	FALSE	2839.7	3020.94	3019.24	3532.07	4149.91	3636.69	4305.31	4250.53
ENSDARG00000020143	1237.48	-0.538037	0.116056	-4.63602	3.55181e-06	0.000105632	FALSE	1344.44	1384.92	1593.28	1523.82	1027.74	968.594	902.281	1130.83
ENSDARG00000040290	494.987	-0.493478	0.106486	-4.63422	3.58285e-06	0.000106315	FALSE	603.953	638.721	641.958	534.744	403.41	415.653	402.322	497.53
ENSDARG00000101357	13.6284	4.07189	0.878967	4.63259	3.61116e-06	0.000107029	FALSE	0	1.07194	1.98144	0.906324	7.6636	12.1176	23.1689	28.7388
ENSDARG00000005004	99.0608	-1.20518	0.260563	-4.6253	3.74054e-06	0.000110732	FALSE	99.851	99.3113	86.731	71.375	40.971	41.0272	43.4478	28.7234
ENSDARG00000009782	1512.92	-0.693059	0.149888	-4.62384	3.76706e-06	0.000111386	FALSE	2089.83	2213.71	2122.29	1950.66	1339.82	1423.85	1047.39	1369.76
ENSDARG00000101407	102.103	-0.940325	0.203556	-4.61949	3.84693e-06	0.000113614	FALSE	137.057	125.516	171.103	196.781	66.4712	94.9425	82.7794	86.051
ENSDARG00000102114	37.7645	-1.51278	0.327774	-4.61531	3.92505e-06	0.000115784	FALSE	68.6468	61.9067	89.0404	58.1822	23.7024	25.0587	23.1959	25.3848
ENSDARG00000060889	108.326	-0.863547	0.187346	-4.60938	4.03875e-06	0.000118874	FALSE	149.892	177.511	182.523	137.253	102.664	87.6937	96.2197	68.5688
ENSDARG00000063518	140.455	-0.991464	0.215098	-4.60935	4.03926e-06	0.000118874	FALSE	188.128	192.012	254.783	182.372	88.5966	122.207	80.7032	120.259
ENSDARG00000092319	21.3421	2.49	0.540321	4.60838	4.05823e-06	0.000119292	FALSE	9.71144	3.03635	0.94023	7.72474	22.5451	35.5048	15.1438	41.8157
ENSDARG00000074069	11.3592	6.04209	1.3114	4.60737	4.07788e-06	0.000119729	FALSE	0	0	0	0	20.0303	7.09304	6.38899	18.9085
ENSDARG00000099153	20.5562	-2.13857	0.464624	-4.60279	4.1687e-06	0.000122253	FALSE	22.1041	34.1873	68.2425	44.7157	12.2805	9.06884	11.6858	5.52818
ENSDARG00000071062	606.062	-0.536292	0.11653	-4.60218	4.1809e-06	0.000122467	FALSE	748.777	702.119	851.325	687.78	540.094	514.44	459.06	548.748
ENSDARG00000098408	181.682	-0.872704	0.189676	-4.60102	4.20428e-06	0.000123008	FALSE	243.34	294.018	308.419	307.635	165.876	140.416	176.955	147.801
ENSDARG00000104733	312.074	-0.571883	0.124307	-4.60056	4.21363e-06	0.000123138	FALSE	402.255	416.557	417.078	372.326	301.309	241.088	304.159	234.063
ENSDARG00000105295	183.824	0.603865	0.131302	4.59906	4.24411e-06	0.000123884	FALSE	140.347	129.944	132.293	148.793	202.722	202.302	223.168	210.531
ENSDARG00000101631	1507.73	-0.360252	0.0783462	-4.59821	4.26137e-06	0.000124244	FALSE	1803.47	1750.5	1872.45	1858.36	1347.69	1394.65	1352.41	1584
ENSDARG00000098535	48.9075	1.2984	0.282511	4.59593	4.30824e-06	0.000125464	FALSE	23.5502	21.3735	30.0188	22.7659	75.8076	42.3211	57.2281	65.2623
ENSDARG00000032098	177.684	-0.746196	0.162458	-4.59317	4.36573e-06	0.000126991	FALSE	210.786	231.351	268.381	264.497	150.239	129.153	155.783	148.015
ENSDARG00000101251	15859.5	-0.324781	0.0707173	-4.59266	4.37632e-06	0.000127152	FALSE	18793.3	19507.8	18160.4	18333.9	13944	15431	15087.1	15255.6
ENSDARG00000099003	243.367	-0.799448	0.174082	-4.59235	4.38277e-06	0.000127192	FALSE	353.297	310.947	349.887	313.577	217.247	195.882	149.011	199.763
ENSDARG00000097889	22.4263	-2.4501	0.53441	-4.58468	4.54674e-06	0.000131798	FALSE	67.1617	55.754	50.2737	38.8614	7.68897	6.05805	2.09897	23.1776
ENSDARG00000014727	1631.14	-0.420591	0.0917497	-4.58412	4.55912e-06	0.000131852	FALSE	2021.09	1820.82	2074.7	1940.75	1454.68	1473.94	1466.13	1474.63
ENSDARG00000055835	212.204	-0.896675	0.195599	-4.58425	4.55613e-06	0.000131852	FALSE	273.902	275.966	319.299	351.789	195.587	117.444	142.227	202.05
ENSDARG00000042742	1280.88	0.367117	0.0801016	4.58313	4.58057e-06	0.000132319	FALSE	1114.36	1063.53	958.132	1132.8	1356.64	1397.2	1386.89	1362.07
ENSDARG00000100116	576.161	-0.426991	0.093231	-4.57993	4.65138e-06	0.00013421	FALSE	684.66	719.566	699.403	590.822	530.559	476.502	505.927	488.337
ENSDARG00000104329	280.835	-0.923043	0.201657	-4.57728	4.71059e-06	0.000135762	FALSE	373.55	370.054	429.905	476.27	225.972	195.094	239.33	210.363
ENSDARG00000016357	729.718	-0.507037	0.110863	-4.57356	4.79508e-06	0.000137881	FALSE	804.441	841.021	916.867	905.335	584.313	683.852	556.501	617.471
ENSDARG00000093844	999.899	-3.1388	0.686279	-4.57365	4.79306e-06	0.000137881	FALSE	1334.34	2495.99	2866.76	2687.99	242.244	432.264	168.687	222.317
ENSDARG00000075385	590.408	0.409169	0.0895107	4.57117	4.84999e-06	0.0001393	FALSE	480.886	428.683	486.954	484.89	624.508	629.858	642.055	601.727
ENSDARG00000038713	742.039	-0.450376	0.0985371	-4.57062	4.86288e-06	0.00013951	FALSE	826.996	1049.45	936.683	882.115	692.546	676.25	676.518	661.255
ENSDARG00000061303	830.149	-0.5252	0.114979	-4.56779	4.92883e-06	0.000141241	FALSE	1026.62	956.886	890.542	1016.68	677.443	649.888	777.186	597.429
ENSDARG00000070834	634.279	-0.381254	0.0834854	-4.56671	4.9543e-06	0.000141808	FALSE	810.695	729.681	761.107	720.43	614.523	620.757	529.38	549.391
ENSDARG00000019253	4239.66	-0.293348	0.0642976	-4.56235	5.05852e-06	0.000144626	FALSE	4886.74	4919.25	5062.52	4893.34	3944.02	3942.01	4106.8	4134.74
ENSDARG00000008200	1233.45	-0.329405	0.0722564	-4.55883	5.1439e-06	0.0001469	FALSE	1344.4	1335.77	1459.51	1364.01	1012.79	1096.53	1115.77	1159.15
ENSDARG00000059729	522.079	-0.55315	0.121354	-4.55814	5.1609e-06	0.000147218	FALSE	576.021	635.013	649.422	622.024	399.145	447.567	407.697	439.528
ENSDARG00000061481	124.95	-1.0367	0.227603	-4.55486	5.24201e-06	0.00014931	FALSE	202.701	172.707	186.889	181.461	100.162	64.6391	79.6503	118.05
ENSDARG00000099658	64.0442	-1.84167	0.404346	-4.5547	5.24614e-06	0.00014931	FALSE	99.0049	63.3311	112.793	109.984	27.0401	40.4158	16.7377	23.1569
ENSDARG00000045932	53.9268	-1.32347	0.290818	-4.55084	5.34327e-06	0.000151901	FALSE	88.8435	77.2429	65.8289	104.666	28.2811	35.3532	34.6012	36.4315
ENSDARG00000090882	25.7524	2.54203	0.558631	4.55047	5.35257e-06	0.000151994	FALSE	9.54225	3.91445	7.84973	7.22235	46.0938	17.6834	25.8965	88.284
ENSDARG00000044002	35.3659	-1.93616	0.425636	-4.54887	5.39346e-06	0.000152981	FALSE	67.1956	63.2464	50.3194	78.6618	20.1662	10.0955	22.0519	15.4542
ENSDARG00000095746	40.9069	2.69195	0.592123	4.54628	5.46037e-06	0.000154704	FALSE	10.754	15.1539	4.62804	10.8902	51.6868	82.1816	63.0499	69.3452
ENSDARG00000012137	139.295	-0.903427	0.198769	-4.54512	5.49046e-06	0.000155381	FALSE	180.605	248.633	160.849	162.787	83.8888	126.858	89.3047	102.727
ENSDARG00000056160	6729.22	-0.404575	0.0891602	-4.53762	5.68923e-06	0.000160825	FALSE	7927.99	8627.04	8466.15	7834.04	6025.02	5820.13	6878.56	6098.48
ENSDARG00000103537	178.246	-0.665357	0.14667	-4.53641	5.72191e-06	0.000161567	FALSE	236.303	204.867	232.244	231.167	152.102	144.419	166.686	105.923
ENSDARG00000063297	287.486	-0.631965	0.139341	-4.53537	5.75014e-06	0.000162181	FALSE	404.949	411.036	348.486	390.52	264.391	227.311	212.476	298.88
ENSDARG00000093780	49.7158	-1.3846	0.305485	-4.53247	5.8297e-06	0.00016424	FALSE	72.8761	75.1059	111.046	116.406	38.5579	44.4453	31.4221	29.7834
ENSDARG00000096739	143.949	-1.15005	0.253899	-4.52955	5.91094e-06	0.000166156	FALSE	217.494	204.808	237.467	274.684	78.8438	120.159	108.067	114.776
ENSDARG00000092477	32.7359	1.6326	0.360423	4.52968	5.90726e-06	0.000166156	FALSE	10.3159	14.957	14.0513	17.3408	28.3354	42.3214	56.3122	51.9633
ENSDARG00000055036	134.339	-1.31343	0.290008	-4.52896	5.92738e-06	0.000166431	FALSE	228.078	200.316	312.386	226.605	67.3461	85.3113	134.838	104.632
ENSDARG00000071662	276.189	0.875792	0.193422	4.52789	5.95751e-06	0.00016709	FALSE	221.072	155.818	205.766	126.429	334.372	295.277	283.263	384.352
ENSDARG00000093068	809.642	-0.765507	0.169166	-4.52519	6.03421e-06	0.000169052	FALSE	1028.86	1027.18	1177.19	1201.39	707.787	635.434	629.639	636.586
ENSDARG00000104660	353.793	-0.481695	0.106476	-4.52399	6.06853e-06	0.000169824	FALSE	445.956	431.11	458.692	424.058	280.27	344.296	324.674	310.981
ENSDARG00000077201	510.81	-0.980663	0.216886	-4.52156	6.13848e-06	0.000171399	FALSE	663.858	810.258	584.796	740.654	332.853	358.621	331.807	395.788
ENSDARG00000100565	61.9542	2.04013	0.451191	4.52165	6.13608e-06	0.000171399	FALSE	7.82571	31.8437	27.8514	22.0506	146.107	92.7512	84.3674	50.3333
ENSDARG00000012035	347.513	0.61381	0.135761	4.52125	6.14755e-06	0.000171461	FALSE	246.306	261.87	303.791	287.83	338.789	468.391	432.211	447.69
ENSDARG00000016968	1458.82	-0.317728	0.0703254	-4.51796	6.24376e-06	0.000173951	FALSE	1680.56	1741.38	1653.62	1588.23	1298.95	1293.72	1348.95	1404.16
ENSDARG00000021154	257.09	-0.763023	0.168971	-4.5157	6.31079e-06	0.000175624	FALSE	339.466	395.98	369.23	362.624	184.241	256.597	207.289	217.281
ENSDARG00000077906	966.346	0.402082	0.0890483	4.51533	6.32187e-06	0.000175737	FALSE	766.304	775.434	846.569	778.128	1105.61	997.776	1044.96	1037.03
ENSDARG00000075002	8.91217	-3.70651	0.821123	-4.51395	6.36306e-06	0.000176686	FALSE	22.1297	27.7742	17.1464	14.6699	0	2.01631	0	4.39489
ENSDARG00000004904	249.99	-0.957572	0.21217	-4.51322	6.38509e-06	0.000177101	FALSE	287.819	435.057	409.911	457.233	210.478	203.921	178.721	227.339
ENSDARG00000046142	163.838	-1.23157	0.272952	-4.51205	6.42046e-06	0.000177886	FALSE	233.79	200.149	304.727	328.892	122.447	78.6668	120.346	133.694
ENSDARG00000102249	846.941	-0.711575	0.157755	-4.51064	6.46313e-06	0.00017887	FALSE	947.74	928.449	1082.73	1084.68	575.53	720.874	521.704	652.323
ENSDARG00000063370	566.125	-0.814145	0.180505	-4.51037	6.47156e-06	0.000178906	FALSE	898.006	966.911	764.244	538.648	503.347	517.558	378.796	397.943
ENSDARG00000019122	47.0528	2.32715	0.516394	4.50654	6.58919e-06	0.000181957	FALSE	26.1182	22.1419	35.049	8.37261	75.8808	96.4814	192.279	93.908
ENSDARG00000052150	4130.4	0.337191	0.0748447	4.50521	6.63075e-06	0.000182904	FALSE	3805.36	3560.23	3617.64	3254.99	4542.91	4552.34	4557.03	4325.02
ENSDARG00000104120	12.8829	-2.9281	0.650001	-4.50477	6.64457e-06	0.000183083	FALSE	26.2076	8.58721	21.5783	37.864	1.93139	3.03117	3.13837	4.41086
ENSDARG00000036864	241.794	-0.972176	0.2159	-4.5029	6.70329e-06	0.000184499	FALSE	330.247	348.985	345.808	263.353	164.486	192.017	150.824	148.633
ENSDARG00000097606	86.5364	-0.99042	0.220189	-4.49805	6.85784e-06	0.000188545	FALSE	133.457	139.131	107.323	125.212	62.0011	66.5617	61.1837	64.1045
ENSDARG00000018426	4897.05	-0.404991	0.0900536	-4.49722	6.88466e-06	0.000189076	FALSE	5807.18	5705.48	6074.62	6013.7	4337.66	4630.55	4353.57	4503.98
ENSDARG00000096809	167.823	-0.757105	0.168536	-4.49224	7.04785e-06	0.000193345	FALSE	219.75	209.352	256.764	227.09	119.841	149.555	135.923	135.614
ENSDARG00000029822	420.624	-1.62806	0.362742	-4.48821	7.18244e-06	0.000196823	FALSE	676.077	1079.65	974.136	703.194	221.014	364.482	301.242	224.059
ENSDARG00000100150	23.7993	-1.99138	0.443716	-4.48797	7.19061e-06	0.000196831	FALSE	65.9122	29.9822	54.531	33.5339	11.4709	18.1592	9.48025	6.62888
ENSDARG00000057125	477.886	-0.468597	0.104439	-4.4868	7.23004e-06	0.000197695	FALSE	612.608	601.485	581.268	585.518	439.511	434.52	391.08	454.335
ENSDARG00000094881	37.042	1.67249	0.373142	4.48219	7.38821e-06	0.0002018	FALSE	14.5839	22.5263	14.7564	9.93136	32.741	57.5681	66.0316	39.7188
ENSDARG00000070161	1454.16	-0.389927	0.0870002	-4.48191	7.39793e-06	0.000201845	FALSE	1508.44	1677.21	1879.05	1756.27	1308.33	1284.12	1199.4	1420.44
ENSDARG00000056909	84.2299	-1.59584	0.356256	-4.47948	7.48236e-06	0.000203927	FALSE	189.343	137.376	114.829	124.449	65.6283	47.4842	30.3497	43.0107
ENSDARG00000092717	14.805	2.55222	0.569905	4.47832	7.52312e-06	0.000204815	FALSE	0	6.41976	2.01454	4.57991	21.6903	24.2311	18.1286	16.5911
ENSDARG00000024478	3427.04	-0.269607	0.060249	-4.47488	7.64528e-06	0.00020769	FALSE	3761.7	3776.46	3969.8	3717.06	3231.5	3103.73	3252.09	3042.52
ENSDARG00000071495	110.627	-1.45319	0.324729	-4.47508	7.63814e-06	0.00020769	FALSE	161.838	197.463	198.021	203.877	53.4177	59.0832	59.4632	107.219
ENSDARG00000019917	1502.95	-0.538291	0.120315	-4.47401	7.67675e-06	0.000208319	FALSE	1807.38	1608.66	1833.68	1765.24	1278.12	1277.35	1062.62	1211.92
ENSDARG00000036463	329.998	-0.685684	0.153311	-4.4725	7.73115e-06	0.000209569	FALSE	413.272	416.446	477.363	289.255	244.488	233.01	246.639	267.41
ENSDARG00000038794	325.163	0.554741	0.124097	4.47022	7.81406e-06	0.000211587	FALSE	264.117	255.733	229.768	283.217	405.037	386.207	348.321	376.951
ENSDARG00000076699	93.7796	-1.1717	0.262215	-4.46848	7.87768e-06	0.00021308	FALSE	145.531	151.635	197.422	102.424	83.5816	60.7055	44.379	76.064
ENSDARG00000039007	19136.6	-0.393251	0.0880142	-4.46804	7.89402e-06	0.000213292	FALSE	19443.9	19139.9	20193.4	19309.5	14466.9	15286.3	14245.8	15457.8
ENSDARG00000100793	242.416	0.930082	0.20825	4.46618	7.96299e-06	0.000214924	FALSE	116.629	150.768	144.725	180.248	318.711	305.539	271.88	236.802
ENSDARG00000034862	193.611	-0.82758	0.185324	-4.46558	7.98517e-06	0.00021529	FALSE	283.298	273.389	274.129	291.055	175.832	163.56	155.355	136.866
ENSDARG00000097959	1158.01	-1.29971	0.29108	-4.46514	8.00153e-06	0.0002155	FALSE	2147.15	2013.9	1937.54	2293.89	942.13	1032.08	391.274	1043.39
ENSDARG00000003820	4404.51	0.493703	0.110593	4.46413	8.03956e-06	0.000216292	FALSE	2919.32	3950.94	3168.11	3638.36	5070.25	5298.03	4025.37	4870.58
ENSDARG00000040298	7269.8	-1.30775	0.29304	-4.46271	8.09308e-06	0.000217498	FALSE	9606.36	11281.5	12919.4	12030.7	3977.36	4604.42	4480.03	5455.1
ENSDARG00000062077	86.8673	-1.69364	0.380102	-4.45575	8.36e-06	0.000224431	FALSE	156.121	187.684	195.932	188.774	47.1481	49.4825	67.1157	61.794
ENSDARG00000003311	2653.34	0.347401	0.0779745	4.45531	8.3772e-06	0.000224652	FALSE	2293.98	2207.58	2230.21	2389.76	2968.13	2968.32	2725.79	2943.29
ENSDARG00000037551	315.745	-0.983849	0.220956	-4.4527	8.47989e-06	0.000227163	FALSE	408.18	384.881	500.273	527.841	240.173	237.569	166.567	277.418
ENSDARG00000008457	424.938	-0.521325	0.11716	-4.44967	8.60031e-06	0.000230143	FALSE	462.008	556.728	549.868	586.631	355.335	357.693	434.82	357.412
ENSDARG00000043848	2635.38	-0.308286	0.0693101	-4.44792	8.67053e-06	0.000231775	FALSE	2812.99	3028.92	3091.55	3167.34	2299.84	2500	2502.65	2477.97
ENSDARG00000089806	21.9522	6.04559	1.35977	4.44603	8.74733e-06	0.000233579	FALSE	0	0	0	3.62673	55.268	47.3598	131.771	25.4008
ENSDARG00000090820	71.9645	-1.22136	0.274761	-4.44516	8.78252e-06	0.000234258	FALSE	92.8261	132.399	84.8256	68.0301	44.1431	40.4034	40.9724	35.9239
ENSDARG00000086077	16.0916	2.56752	0.577628	4.44494	8.79147e-06	0.000234258	FALSE	3.83949	1.66344	0	7.45807	17.2081	15.7261	18.7136	21.873
ENSDARG00000075178	1015.71	-0.353819	0.0796123	-4.44428	8.81865e-06	0.000234733	FALSE	1138.97	1263.21	1217.98	1187.68	855.093	987.064	934.565	989.247
ENSDARG00000044861	15863.3	0.560746	0.126233	4.44213	8.90708e-06	0.000236836	FALSE	16705.4	13958.8	12191.2	11551.4	19788	17164.1	22359.2	20929.3
ENSDARG00000062297	101.128	-0.99924	0.225146	-4.43818	9.07213e-06	0.000240714	FALSE	119.636	141.571	117.153	108.381	52.9268	46.4537	91.229	52.9652
ENSDARG00000036833	57.0701	-1.5843	0.356968	-4.43821	9.07082e-06	0.000240714	FALSE	82.7097	76.7398	105.793	83.0284	29.6241	12.0439	37.5478	37.2987
ENSDARG00000004211	1133.05	0.344903	0.0777945	4.43351	9.27123e-06	0.000245737	FALSE	897.086	890.257	1081.53	1022.2	1195.61	1207.86	1267.46	1282.11
ENSDARG00000074552	2826.53	-0.342464	0.0772573	-4.43277	9.30308e-06	0.00024632	FALSE	3261.62	3122.14	3152.62	3011.76	2432.39	2629.88	2293.06	2538.25
ENSDARG00000004187	742.399	0.437992	0.0988174	4.43233	9.32192e-06	0.000246559	FALSE	597.516	742.371	675.803	724.347	932.184	908.739	930.683	948.358
ENSDARG00000094436	4.696	-6.21629	1.40311	-4.43035	9.4079e-06	0.000248571	FALSE	13.3406	6.29584	29.5737	7.14199	0	0	0	0
ENSDARG00000093877	141.383	0.752114	0.169803	4.42933	9.45243e-06	0.000249041	FALSE	77.6591	88.0116	97.1227	105.541	137.315	158.212	145.617	185.519
ENSDARG00000038258	288.009	-0.871859	0.196843	-4.42922	9.45749e-06	0.000249041	FALSE	406.455	480.989	440.575	360.874	279.156	202.928	225.144	214.806
ENSDARG00000091320	182.248	1.1093	0.250461	4.42904	9.46543e-06	0.000249041	FALSE	119.806	87.2731	106.555	79.8551	196.069	189.213	253.872	204.984
ENSDARG00000042332	123.895	1.34158	0.30289	4.42928	9.45503e-06	0.000249041	FALSE	54.2449	67.1503	35.6423	48.6021	101.66	101.759	197.512	120.911
ENSDARG00000016494	788.535	-0.769721	0.173861	-4.42721	9.5459e-06	0.000250895	FALSE	836.016	1016.27	1255.34	1200.71	604.719	657.249	582.085	685.607
ENSDARG00000094929	83.7536	-1.7102	0.386328	-4.42681	9.5637e-06	0.0002511	FALSE	102.953	128.278	146.853	110.079	36.0676	32.2491	41.2814	39.8204
ENSDARG00000103639	860.984	-0.736578	0.166622	-4.42066	9.83991e-06	0.000258081	FALSE	994.674	1062.4	1209.96	1134.19	638.167	747.709	599.535	657.048
ENSDARG00000090171	54.9419	-1.13297	0.256385	-4.41903	9.91451e-06	0.000259766	FALSE	81.6302	72.9568	71.7517	65.8796	30.8406	36.3633	32.4735	33.0939
ENSDARG00000040984	210.2	0.691085	0.156418	4.4182	9.95274e-06	0.000260496	FALSE	177.708	139.013	134.444	156.639	209.762	226.755	284.298	256.447
ENSDARG00000061602	392.023	0.908364	0.205664	4.41673	1.00203e-05	0.000261992	FALSE	235.072	214.36	232.697	244.012	428.348	450.533	362.096	497.685
ENSDARG00000103503	726.544	-0.512844	0.116171	-4.41455	1.01219e-05	0.000264372	FALSE	910.688	981.856	1046.04	1030.25	660.63	722.289	671.161	730.178
ENSDARG00000079727	1373.46	-0.775331	0.175674	-4.41347	1.01728e-05	0.000265423	FALSE	1345.52	1461.15	1498.91	1602.61	772.32	932.38	803.061	945.258
ENSDARG00000053620	70.3132	-1.58624	0.359509	-4.41225	1.02304e-05	0.00026665	FALSE	118.987	124.064	161.466	173.553	38.9995	54.4361	47.5602	51.9734
ENSDARG00000075698	61.1086	-1.16884	0.265152	-4.40818	1.04242e-05	0.000271418	FALSE	109.287	105.159	92.3332	86.6087	41.4673	38.387	39.7899	55.1501
ENSDARG00000063059	56.1107	-1.36658	0.310296	-4.40412	1.06213e-05	0.000276264	FALSE	85.5435	76.8336	114.386	91.5588	23.9643	27.1261	35.596	57.0554
ENSDARG00000102874	3477.92	-0.245651	0.055796	-4.40267	1.06928e-05	0.000277837	FALSE	3978.11	3896.79	3778.37	3802.39	3176.56	3315.72	3252.04	3287.68
ENSDARG00000022983	691.7	-0.379522	0.0862247	-4.40155	1.07481e-05	0.000278534	FALSE	814.776	765.019	743.192	794.914	595.513	645.767	581.811	571.423
ENSDARG00000037121	707.79	0.530615	0.120548	4.40169	1.07411e-05	0.000278534	FALSE	599.902	580.153	553.856	623.208	807.611	929.604	957.268	709.935
ENSDARG00000035005	368.798	-0.532771	0.121044	-4.40145	1.0753e-05	0.000278534	FALSE	465.563	537.405	496.397	471.538	343.177	347.633	355.672	316.257
ENSDARG00000098129	74.2851	-1.24224	0.282365	-4.39942	1.08542e-05	0.000280865	FALSE	76.1458	115.658	179.374	108.734	37.2964	42.3742	72.6605	51.9221
ENSDARG00000039966	2274.27	0.306204	0.0696465	4.39655	1.09983e-05	0.000283716	FALSE	2031.68	2052.64	1938.14	2035.12	2360.45	2401.6	2556.99	2644.96
ENSDARG00000031299	521.7	-0.519967	0.118257	-4.39694	1.09788e-05	0.000283716	FALSE	652.478	640.65	684.607	747.824	421.459	560.082	491.237	429.61
ENSDARG00000079784	462.975	0.669959	0.152378	4.39668	1.09919e-05	0.000283716	FALSE	358.017	342.982	380.106	362.682	499.053	551.161	707.001	540.959
ENSDARG00000001754	1133.72	0.443533	0.101016	4.39073	1.12973e-05	0.000291129	FALSE	769.553	979.991	914.919	968.521	1196.35	1241.83	1281.13	1231.14
ENSDARG00000060862	2908.32	0.30091	0.0686385	4.38398	1.16529e-05	0.000299985	FALSE	2309.3	2218.21	2480.2	2681.26	3128.02	2914.3	2913.56	2989.9
ENSDARG00000020298	2150.17	0.549556	0.125364	4.38368	1.16692e-05	0.000300095	FALSE	1456.04	1724.6	1595.8	1476.67	2298.04	2343.9	1930.46	2582.04
ENSDARG00000043511	1559.25	-0.417285	0.0952081	-4.38287	1.17126e-05	0.000300903	FALSE	1630.18	1672.26	1986.89	1953.91	1371.96	1299.18	1414.18	1343.82
ENSDARG00000088984	1185.28	0.320335	0.0731147	4.38127	1.17991e-05	0.000302815	FALSE	999.856	992.858	1084.81	987.865	1339.83	1327.78	1224.3	1185.17
ENSDARG00000019732	2610.54	-0.244773	0.0558736	-4.38083	1.18228e-05	0.000303114	FALSE	2829.21	2995.79	2976.15	2868.6	2374.51	2535.3	2448.21	2494.15
ENSDARG00000040401	1059.56	-0.379952	0.0867796	-4.37836	1.19578e-05	0.00030595	FALSE	1225.89	1247.77	1307.95	1233.01	1076.17	938.298	967.887	870.131
ENSDARG00000099444	32.0016	2.10469	0.480684	4.37853	1.19482e-05	0.00030595	FALSE	4.32672	21.1371	1.94987	8.92584	44.4387	43.8002	46.6619	22.8713
ENSDARG00000096720	9.37303	5.24778	1.19873	4.37779	1.19888e-05	0.000306429	FALSE	0	0	0	0	4.69061	7.13246	10.7728	7.77355
ENSDARG00000029905	828.773	-0.564715	0.129191	-4.37117	1.2358e-05	0.000315231	FALSE	902.572	985.993	1115.02	1114.74	645.015	715.334	671.693	755.878
ENSDARG00000104783	272.265	0.688321	0.157468	4.37117	1.23583e-05	0.000315231	FALSE	220.123	220.177	253.192	145.873	338.139	342.017	287.571	370.045
ENSDARG00000068967	107.207	-0.79037	0.181002	-4.36663	1.26181e-05	0.00032153	FALSE	146.145	128.613	158.984	153.77	91.1567	99.9331	81.9508	66.2421
ENSDARG00000038040	379.095	-0.605455	0.138668	-4.36621	1.26419e-05	0.00032155	FALSE	425.518	458.248	460.157	503.145	294.432	263.434	342.237	316.151
ENSDARG00000074561	148.718	-0.982666	0.225064	-4.36617	1.26445e-05	0.00032155	FALSE	205.769	225.203	227.519	201.454	84.646	156.518	86.0113	108.146
ENSDARG00000052894	500.323	0.721826	0.165495	4.36161	1.29109e-05	0.000327992	FALSE	361.158	357.168	373.576	450.41	746.555	703.359	588.757	509.166
ENSDARG00000001818	355.886	-0.81928	0.187984	-4.35825	1.31104e-05	0.000332723	FALSE	472.521	555.137	525.438	480.798	310.686	271.836	269.466	300.967
ENSDARG00000095179	8.4075	-3.35655	0.770626	-4.35561	1.32696e-05	0.000336422	FALSE	16.2025	16.0062	28.149	23.783	1.87611	1.00715	1.06461	4.40686
ENSDARG00000052859	602.449	-0.460432	0.105716	-4.35537	1.3284e-05	0.000336446	FALSE	727.996	829.18	772.779	620.304	544.098	531.041	550.604	516.88
ENSDARG00000100844	324.04	-0.584688	0.134286	-4.35405	1.33646e-05	0.000338147	FALSE	413.264	390.181	436.856	365.661	210.323	256.211	305.869	299.637
ENSDARG00000060051	213.264	0.878351	0.201771	4.35321	1.3416e-05	0.000339107	FALSE	80.2093	89.0337	99.3549	107.437	170.454	162.606	162.454	199.696
ENSDARG00000099819	577.255	-0.69032	0.158617	-4.35211	1.34834e-05	0.000340466	FALSE	656.723	842.274	817.855	622.658	401.865	486.375	475.337	459.47
ENSDARG00000077960	97.5974	-1.19357	0.274349	-4.35055	1.35796e-05	0.000342549	FALSE	98.006	162.849	232.438	198.251	59.3998	83.7627	99.9164	60.7394
ENSDARG00000103130	279.383	-0.970256	0.223356	-4.34399	1.39916e-05	0.000352589	FALSE	384.783	414.263	369.044	335.633	249.316	120.31	235.779	162.547
ENSDARG00000037064	422.528	-0.467682	0.107672	-4.34359	1.40171e-05	0.000352876	FALSE	502.639	496.854	592.134	549.345	366.557	411.162	367.464	405.884
ENSDARG00000004925	50.64	1.13863	0.262199	4.34262	1.40793e-05	0.000354086	FALSE	17.2421	28.6842	28.9459	26.3224	40.3822	60.1221	64.4575	62.6645
ENSDARG00000100854	2435.58	0.31464	0.072467	4.34183	1.41298e-05	0.000355001	FALSE	2204.23	2099.31	2086.85	2087.24	2764.95	2463.47	2547.34	2763.43
ENSDARG00000021987	6938.8	-0.292971	0.0674829	-4.34141	1.41571e-05	0.000355331	FALSE	7889.66	8240.19	7907.12	7958	6858.35	5952.52	7105	6203.73
ENSDARG00000003523	30.8352	-4.56028	1.0511	-4.33858	1.43405e-05	0.000359573	FALSE	27.8948	60.2669	43.7697	104.27	6.68529	0	2.11205	1.10649
ENSDARG00000061634	413.419	-0.693844	0.160008	-4.33629	1.44905e-05	0.000362971	FALSE	498.326	586.802	555.393	396.906	263.544	302.438	382.112	311.208
ENSDARG00000040705	1096.53	-0.408824	0.0942996	-4.33538	1.4551e-05	0.000364124	FALSE	1270.33	1290.16	1302.71	1359.72	896.57	1045.29	972.373	1023.79
ENSDARG00000062956	2362.8	-1.41499	0.326476	-4.33414	1.46329e-05	0.000365807	FALSE	3452.31	2845.89	3511.65	3297.25	1265.28	1144.46	1274.32	1231.16
ENSDARG00000013266	131.488	0.722885	0.166807	4.33366	1.46651e-05	0.000366248	FALSE	103.449	85.8472	101.157	92.9163	159.144	167.694	148.673	155.519
ENSDARG00000035663	131.116	-1.42787	0.329645	-4.33154	1.48069e-05	0.000369422	FALSE	132.433	234.352	216.286	212.977	97.1667	84.2971	54.5605	60.9694
ENSDARG00000032155	948.918	0.390436	0.0901462	4.33114	1.48336e-05	0.00036972	FALSE	732.23	922.113	842.732	751.427	1109.27	1047.66	1070.35	1035.64
ENSDARG00000100265	264.546	-1.03141	0.238168	-4.33059	1.4871e-05	0.000370283	FALSE	320.674	324.02	328.26	305.018	111.806	187.879	158.169	167.673
ENSDARG00000090689	1721.68	0.705727	0.1631	4.32697	1.51176e-05	0.00037605	FALSE	1492.61	1308.45	1340.57	1272.19	2302.68	2542.55	2079.41	1901.11
ENSDARG00000053845	17.1363	-3.06773	0.709868	-4.32155	1.54934e-05	0.000385016	FALSE	33.8158	37.3941	46.945	54.5678	4.74196	3.02178	7.40763	5.52794
ENSDARG00000090623	658.274	0.358528	0.083024	4.31836	1.57192e-05	0.00039024	FALSE	549.547	546.686	471.512	494.288	646.712	646.891	681.958	661.315
ENSDARG00000010145	116.736	-1.58594	0.367442	-4.31616	1.58768e-05	0.000393765	FALSE	217.618	204.761	192.339	157.3	84.5305	33.3164	64.0431	75.0593
ENSDARG00000038052	54.8372	-0.935331	0.216844	-4.31339	1.6077e-05	0.000398334	FALSE	87.9561	75.5007	76.5105	89.7502	42.4348	42.3815	44.6772	43.0106
ENSDARG00000079111	2490.29	-0.679924	0.157655	-4.31274	1.61242e-05	0.00039911	FALSE	3353.85	3463.71	3580.66	4041.16	2217.83	2378.18	1972.76	2445.64
ENSDARG00000030765	1961.91	-0.355021	0.0824835	-4.30415	1.67628e-05	0.000414507	FALSE	2434.43	2483.11	2410.67	2421.04	1809.7	1912.78	1937.48	1963.32
ENSDARG00000025375	3501.81	-0.452311	0.105096	-4.30378	1.67912e-05	0.000414801	FALSE	4125.6	4175.84	4668.61	4307.37	3082.75	3055.6	3083.82	3407.76
ENSDARG00000087583	13.6203	5.35566	1.24479	4.30244	1.68925e-05	0.000416893	FALSE	0	2.15691	0	0	23.526	23.4193	18.3004	24.4147
ENSDARG00000077712	45.4936	1.32999	0.309177	4.30171	1.69484e-05	0.000417861	FALSE	26.0765	18.3652	32.6307	20.0718	47.1674	73.5647	64.236	57.8954
ENSDARG00000020866	2356.03	-1.64263	0.381911	-4.30108	1.6997e-05	0.000418647	FALSE	3128.09	3392.46	4955.68	4153.66	1090.01	1271.47	1003.98	1640.78
ENSDARG00000087327	602.716	0.347879	0.0809046	4.29986	1.70904e-05	0.000420534	FALSE	520.156	502.207	485.156	517.803	614.397	633.4	659.601	669.502
ENSDARG00000102719	80.0894	0.932004	0.21691	4.29672	1.73343e-05	0.000426117	FALSE	36.3975	65.4789	50.9986	44.1726	99.4755	80.8324	104.606	93.7292
ENSDARG00000041323	1087.5	0.326997	0.0761219	4.29569	1.74147e-05	0.000427676	FALSE	920.836	843.962	882.585	883.264	1119.38	1055.39	1100.11	1151.03
ENSDARG00000026811	326.308	-0.480491	0.111917	-4.29329	1.76043e-05	0.000431908	FALSE	397.371	448.732	420.569	472.282	327.525	305.159	311.645	304.322
ENSDARG00000009046	199.604	0.617224	0.143778	4.29291	1.7635e-05	0.000432239	FALSE	166.35	136.062	118.017	154.474	242.495	207.398	221.585	205.753
ENSDARG00000017047	277.355	-0.634003	0.147732	-4.29159	1.77402e-05	0.000434393	FALSE	374.642	404.473	368.618	412.442	286.216	220.197	235.708	263.652
ENSDARG00000088972	174.749	-0.816301	0.190283	-4.28993	1.78727e-05	0.00043721	FALSE	208.228	202.864	238.391	199.257	114.896	109.119	138.106	120.2
ENSDARG00000059923	930.808	-0.462552	0.107845	-4.28903	1.79452e-05	0.000438556	FALSE	990.065	954.862	1041.63	1203.62	794.54	763.225	661.737	826.597
ENSDARG00000075444	516.054	-0.730599	0.170382	-4.28801	1.80278e-05	0.000440144	FALSE	610.527	699.903	746.006	760.89	436.65	404.451	413.701	444.769
ENSDARG00000099116	444.537	-0.364714	0.0851933	-4.28102	1.86038e-05	0.000453767	FALSE	502.513	547.13	520.004	509.571	391.049	432.775	402.884	388.738
ENSDARG00000054343	132.09	0.832252	0.194456	4.2799	1.86974e-05	0.000455605	FALSE	71.4883	57.916	65.957	76.7682	137.616	106.036	122.684	118.067
ENSDARG00000101232	245.125	-0.72654	0.169783	-4.27922	1.87547e-05	0.000456559	FALSE	353.55	302.786	303.669	337.857	154.699	196.051	213.234	220.492
ENSDARG00000021137	1246.56	0.341402	0.0798108	4.27764	1.88883e-05	0.00045892	FALSE	1018.14	1046.49	984.363	1101.06	1473.93	1282.94	1216.35	1285.84
ENSDARG00000022183	255.061	-0.77774	0.181807	-4.27784	1.88715e-05	0.00045892	FALSE	327.617	318.216	376.753	396.455	215.614	217.993	157.738	237.425
ENSDARG00000062864	524.838	-0.363836	0.0850652	-4.27714	1.89309e-05	0.000459509	FALSE	611.662	696.568	648.621	639.321	530.907	483.947	498.097	506.187
ENSDARG00000013711	484.605	-0.816608	0.190984	-4.2758	1.90453e-05	0.00046184	FALSE	590.234	602.415	637.539	610.382	321.623	349.29	322.43	392.996
ENSDARG00000088589	106.019	1.2355	0.289156	4.27279	1.93045e-05	0.000467672	FALSE	98.1417	74.2151	72.2173	68.7935	162.364	184.702	150.575	236.814
ENSDARG00000102815	29.7515	1.65086	0.386457	4.27179	1.93908e-05	0.00046931	FALSE	13.1437	16.0812	5.91732	13.5594	43.2314	30.2883	41.9918	36.425
ENSDARG00000100709	1226.03	-0.705551	0.165214	-4.27053	1.95011e-05	0.000471524	FALSE	1652.04	1779.28	1831.17	1835.55	1041.92	1208.25	1052.06	1051.08
ENSDARG00000076440	820.832	0.421388	0.0987656	4.26655	1.98517e-05	0.000479077	FALSE	647.715	788.329	700.805	573.459	946.128	911.932	905.881	863.965
ENSDARG00000060010	595.14	-0.653015	0.153048	-4.26673	1.98357e-05	0.000479077	FALSE	721.215	852.731	728.021	754.594	512.969	476.052	535.849	418.855
ENSDARG00000054211	69.9998	-1.10676	0.259431	-4.26611	1.98907e-05	0.000479557	FALSE	79.3467	120.635	115.012	80.3627	27.4792	52.821	47.7079	57.1898
ENSDARG00000092916	63.6767	-1.0954	0.257015	-4.26202	2.02585e-05	0.000487957	FALSE	65.2246	76.9578	97.3468	85.5373	41.1844	41.5343	42.2824	27.5707
ENSDARG00000042030	2080.82	0.283516	0.0665315	4.26137	2.03174e-05	0.000487968	FALSE	1804.07	1766.77	1763.74	1761.67	2142.65	2202.62	2073.56	2216.5
ENSDARG00000086739	334.239	-0.481239	0.112929	-4.26144	2.03113e-05	0.000487968	FALSE	331.323	415.055	431.579	397.505	290.931	287.685	272.542	281.459
ENSDARG00000027807	424.911	-0.62183	0.145921	-4.26142	2.03132e-05	0.000487968	FALSE	496.274	533.573	442.994	492.043	275.426	351.654	291.723	358.333
ENSDARG00000095177	6.8169	5.72979	1.34521	4.25939	2.04982e-05	0.000491839	FALSE	0	0	0	0	4.63699	15.0987	3.2229	19.4162
ENSDARG00000016866	258.751	-0.72544	0.170381	-4.25776	2.06487e-05	0.000494503	FALSE	316.654	449.186	359.419	366.884	210.25	227.354	254.957	210.994
ENSDARG00000036068	72.5081	-0.992502	0.233098	-4.25787	2.06386e-05	0.000494503	FALSE	90.8977	84.5601	114.213	126.991	45.8103	65.5587	59.0521	39.785
ENSDARG00000073850	49.1002	-1.65166	0.3881	-4.25577	2.08333e-05	0.000498448	FALSE	81.3993	146.562	66.3139	71.8727	27.5946	16.6302	34.4507	38.1488
ENSDARG00000053853	983.82	-1.41543	0.332614	-4.25546	2.08617e-05	0.000498652	FALSE	1090.14	1083.71	1217.39	1379.63	440.587	437.391	355.035	555.943
ENSDARG00000100661	289.294	0.604628	0.142109	4.25467	2.09354e-05	0.000499937	FALSE	177.577	243.691	198.024	217.21	337.196	347.6	289.678	301.013
ENSDARG00000055350	1809.7	0.32868	0.0772718	4.25355	2.10404e-05	0.000501237	FALSE	1569.81	1551.74	1533.16	1520.43	2023.98	1771.94	1902.72	2055.25
ENSDARG00000059816	541.114	0.696932	0.163846	4.25358	2.1038e-05	0.000501237	FALSE	376.313	249.189	336.901	392.381	549.564	618.156	546.518	475.872
ENSDARG00000070770	40.0558	-1.51486	0.356147	-4.25345	2.10498e-05	0.000501237	FALSE	73.0222	55.7477	56.2165	69.6063	30.7413	13.1248	30.4448	14.3493
ENSDARG00000097285	61.5538	-0.942802	0.221693	-4.25274	2.11174e-05	0.000502371	FALSE	86.3701	115.672	74.2854	94.2109	52.6246	47.4225	48.4234	44.1848
ENSDARG00000103308	436.474	-0.791447	0.18612	-4.25235	2.1154e-05	0.000502764	FALSE	457.76	459.179	505.305	485.569	259.208	273.728	323.727	246.006
ENSDARG00000099315	262.628	-0.764017	0.179852	-4.24804	2.15651e-05	0.000512049	FALSE	313.259	323.489	289.567	316.908	187.289	149.993	175.433	219.774
ENSDARG00000052734	1652	-0.899221	0.211712	-4.24738	2.16288e-05	0.000513075	FALSE	1829.29	1871.41	2002.77	1730.53	977.982	946.609	1026.45	1035.07
ENSDARG00000101495	266.477	-0.616083	0.145069	-4.24683	2.16815e-05	0.00051384	FALSE	310.442	351.808	374.221	344.484	217.296	223.435	214.027	248.038
ENSDARG00000035120	1072.54	-0.643722	0.151756	-4.24183	2.21708e-05	0.00052494	FALSE	1122.98	985.233	1078.57	1140.02	750.708	674.114	704.247	639.734
ENSDARG00000099160	54.5442	-3.48166	0.821245	-4.23949	2.24024e-05	0.000529924	FALSE	128.247	97.4067	54.0042	73.5012	15.8638	4.74952	4.96405	6.04989
ENSDARG00000016545	982.715	-0.568863	0.134247	-4.23744	2.26079e-05	0.00053428	FALSE	1224.85	1157.9	1352.17	1285.21	821.654	945.175	776.876	841.081
ENSDARG00000042703	489.752	0.511361	0.120693	4.23687	2.2666e-05	0.000535148	FALSE	353.123	383.392	443.352	398.759	506.896	590.344	510.415	649.908
ENSDARG00000012504	1052.97	0.448542	0.10593	4.23431	2.29257e-05	0.000540207	FALSE	981.23	818.63	883.778	857.957	1102.33	1245.44	1273.23	1206.94
ENSDARG00000103687	596.359	-1.85169	0.437327	-4.23412	2.29449e-05	0.000540207	FALSE	776.265	1160.31	1418.58	1248.28	337.984	492.819	223.141	221.485
ENSDARG00000079901	38.7404	-2.10374	0.496833	-4.23431	2.29257e-05	0.000540207	FALSE	112.012	54.7741	89.1189	90.6973	17.2672	36.2595	8.75725	19.1049
ENSDARG00000014517	2998.83	-0.220589	0.0521361	-4.23103	2.32627e-05	0.000547176	FALSE	3455.73	3508.77	3311.46	3402.5	2972.16	2898.6	3043.04	2821.59
ENSDARG00000005834	522.159	0.499237	0.118148	4.22553	2.38382e-05	0.000560186	FALSE	467.458	467.274	444.114	446.367	729.492	626.533	594.166	627.229
ENSDARG00000097799	225.032	-0.643328	0.15227	-4.22493	2.39017e-05	0.000561153	FALSE	340.025	246.859	315.242	306	171.493	161.221	217.277	223.441
ENSDARG00000101689	98.8829	-1.53655	0.363781	-4.22382	2.40193e-05	0.000563386	FALSE	162.794	133.619	210.729	191.296	43.4275	48.3378	90.1454	59.2579
ENSDARG00000052957	1094.45	0.35412	0.0838671	4.22239	2.41728e-05	0.000566457	FALSE	875.18	777.612	904.827	916.525	1149.23	1139.14	1005.67	1148.47
ENSDARG00000053500	394.609	-0.840978	0.19923	-4.22113	2.43078e-05	0.000569088	FALSE	485.403	594.723	546.533	615.537	283.917	283.489	344.343	341.542
ENSDARG00000058606	2133.93	0.58134	0.137787	4.2191	2.45275e-05	0.000573696	FALSE	1519.23	1538.14	1649.15	1368.76	2602.21	2048.2	1851.19	2587.98
ENSDARG00000101239	1467.65	-0.431464	0.102289	-4.2181	2.46365e-05	0.000575708	FALSE	1691.65	1769.58	1882.39	2066.36	1375.82	1355.5	1263.61	1504.22
ENSDARG00000060655	10.6028	-3.16365	0.750272	-4.21667	2.4794e-05	0.000578849	FALSE	21.8091	26.8368	28.3808	15.3062	2.90122	2.0206	2.08899	3.30586
ENSDARG00000074985	903.614	-0.3332	0.0790457	-4.21528	2.49466e-05	0.000581871	FALSE	1030.84	1032.94	1092.79	1045.79	790.163	854.302	897.104	795.773
ENSDARG00000028336	1042.47	-0.495084	0.117456	-4.21505	2.49718e-05	0.000581918	FALSE	968.521	1047.08	1144.89	1126.01	709.809	811.034	753.461	770.141
ENSDARG00000104173	2463.36	-0.31611	0.0750361	-4.21277	2.52253e-05	0.000587278	FALSE	3034.79	3104.72	2769.38	2852.94	2204.74	2508.87	2424.02	2306.93
ENSDARG00000091994	29.8465	-2.30019	0.546266	-4.21075	2.54524e-05	0.000592017	FALSE	93.1093	61.4383	51.8012	51.8279	0.892433	14.9572	19.494	17.3521
ENSDARG00000014232	180.71	-0.900522	0.213983	-4.20839	2.57201e-05	0.000597688	FALSE	218.539	300.393	258	272.112	150.192	146.348	135.429	130.578
ENSDARG00000023157	156.164	-1.1956	0.284283	-4.20567	2.60314e-05	0.000604362	FALSE	191.626	230.344	288.823	309.602	93.888	121.102	118.85	112.644
ENSDARG00000002794	184.26	-0.704077	0.167425	-4.20534	2.60695e-05	0.000604686	FALSE	205.494	231.763	243.675	246.33	144.612	144.45	143.481	137.883
ENSDARG00000097878	151.365	1.24286	0.295572	4.20494	2.61156e-05	0.000605197	FALSE	139.598	40.7627	46.1249	100.334	163.39	221.525	196.41	184.515
ENSDARG00000092277	58.7048	1.13473	0.269876	4.20464	2.61495e-05	0.000605422	FALSE	31.0557	24.9014	55.2504	24.1004	73.7215	79.3564	83.8023	61.9183
ENSDARG00000058462	4414.65	-1.1279	0.268312	-4.2037	2.62587e-05	0.00060739	FALSE	5133.89	5907.21	6144.9	5838.08	2230.59	2747.47	2788.86	2768.99
ENSDARG00000097503	519.714	-0.816848	0.194469	-4.20039	2.66452e-05	0.000615762	FALSE	569.571	760.99	673.861	621.882	292.277	326.813	508.833	364.522
ENSDARG00000062808	15.19	-2.70643	0.644596	-4.19865	2.68515e-05	0.000619959	FALSE	38.0122	13.9309	53.3607	45.2418	2.87675	1.00933	7.35781	12.1459
ENSDARG00000018146	846.504	-0.437602	0.104293	-4.1959	2.71789e-05	0.00062694	FALSE	1006.83	911.53	1158.5	1110.96	667.869	852.603	741.398	833.864
ENSDARG00000002991	483.219	0.793084	0.189291	4.18977	2.79239e-05	0.000643532	FALSE	311.997	351.024	259.079	281.752	581.973	409.355	617.165	475.119
ENSDARG00000090063	1318.27	-0.480686	0.114746	-4.18912	2.80034e-05	0.000644181	FALSE	1541.76	1600.8	1665	1519.73	1033.85	1128.58	1183.49	1189.67
ENSDARG00000076773	96.0392	-1.20396	0.287392	-4.18927	2.79857e-05	0.000644181	FALSE	92.8838	125.294	109.336	144.961	47.5138	49.1883	65.1358	44.1809
ENSDARG00000024433	19006.8	-0.405554	0.0968998	-4.1853	2.84793e-05	0.000654528	FALSE	22102.8	20277.1	21937.8	20659.1	15414.6	16725.2	14671.2	17341.1
ENSDARG00000057881	2440.56	-0.410966	0.0982487	-4.18292	2.87791e-05	0.000660811	FALSE	2836.17	2986.69	3003	3209.01	2220.21	2467.07	2192.86	2173.79
ENSDARG00000103001	626.624	0.531681	0.127241	4.17852	2.93408e-05	0.000673094	FALSE	417.164	384.782	453.027	461.232	691.86	590.452	576.019	624.635
ENSDARG00000019081	517.999	-0.559275	0.133853	-4.17829	2.93709e-05	0.000673168	FALSE	614.489	535.12	594.254	549.844	347.206	381.217	391.365	436.574
ENSDARG00000062182	61.2852	-1.1128	0.266408	-4.17707	2.95294e-05	0.000675566	FALSE	96.3691	112.577	110.419	108.457	44.2064	71.6857	34.6357	47.46
ENSDARG00000014657	6.40513	-5.8689	1.40501	-4.17713	2.95212e-05	0.000675566	FALSE	9.33712	16.4301	6.21036	12.2086	0	0	0	0
ENSDARG00000037144	174.223	-1.1052	0.264671	-4.17576	2.96989e-05	0.000678763	FALSE	256.465	244.704	255.021	301.231	109.055	148.95	123.617	110.078
ENSDARG00000103650	38.4342	1.84278	0.441322	4.17558	2.97233e-05	0.000678763	FALSE	20.3699	11.5932	3.78929	8.35353	32.6814	40.474	32.0481	34.0903
ENSDARG00000017388	837.726	-0.429623	0.102967	-4.17242	3.01381e-05	0.00068761	FALSE	929.729	1091.31	1068.05	998.419	748.974	780.924	750.706	756.704
ENSDARG00000078258	308.265	-0.534467	0.128157	-4.1704	3.04061e-05	0.000693093	FALSE	302.653	381.154	391.891	348.695	271.651	225.353	232.071	256.881
ENSDARG00000021059	3702.1	-0.617786	0.148203	-4.1685	3.06609e-05	0.000698266	FALSE	3995.36	4444.17	4708.19	4803.79	2713.89	3121.35	2659.78	3205.67
ENSDARG00000094640	71.804	1.2393	0.297371	4.1675	3.07955e-05	0.000700695	FALSE	21.0509	50.8481	48.3047	25.6065	111.095	56.3217	87.2189	88.7744
ENSDARG00000101423	2228.52	-0.740465	0.177695	-4.16706	3.08559e-05	0.000701433	FALSE	2986.5	3041.18	3293.05	3324.01	1912.77	1880.6	1791.04	1984.78
ENSDARG00000037906	213.909	-0.881214	0.211614	-4.16426	3.12369e-05	0.000709451	FALSE	275.367	276.265	271.663	263.74	140.518	79.6985	166.431	204.39
ENSDARG00000068876	427.443	-0.720254	0.173023	-4.16277	3.14409e-05	0.000713438	FALSE	468.659	587.568	596.354	635.323	349.865	369.544	316.933	354.283
ENSDARG00000056719	410.606	-0.981606	0.235886	-4.16135	3.16368e-05	0.000717235	FALSE	454.754	614.792	613.224	762.515	357.616	373.743	219.958	287.908
ENSDARG00000036834	9374.48	-0.582279	0.139949	-4.16064	3.17358e-05	0.000718829	FALSE	10542.9	11036.6	11279	10368.7	6900.31	7123.01	7407.01	7441.99
ENSDARG00000029795	1952.65	-0.542959	0.130511	-4.16026	3.17886e-05	0.000719375	FALSE	2202.19	2359.2	2500.63	2224.04	1490	1867.34	1424.39	1594.11
ENSDARG00000026855	133.599	0.879261	0.211628	4.15475	3.25642e-05	0.000736263	FALSE	86.0493	93.3216	120.029	73.1341	176.209	190.881	177.142	141.225
ENSDARG00000098832	834.232	0.366971	0.0883394	4.15411	3.26559e-05	0.000737097	FALSE	785.257	753.463	712.463	720.935	1004.31	847.652	1022.38	953.477
ENSDARG00000027609	182.296	-0.689065	0.165882	-4.15394	3.26797e-05	0.000737097	FALSE	203.595	231.965	240.773	248.559	121.924	129.369	171.33	153.219
ENSDARG00000075140	671.809	-0.78045	0.187885	-4.15387	3.26893e-05	0.000737097	FALSE	792.04	811.496	799.359	812.262	478.03	498.125	444.595	451.008
ENSDARG00000099441	722.705	0.415499	0.100039	4.15339	3.27592e-05	0.000738009	FALSE	614.904	624.217	625.282	613.404	976.565	803.864	805.916	722.192
ENSDARG00000071017	230.803	-0.557856	0.134336	-4.15269	3.28583e-05	0.000739576	FALSE	248.016	282.074	327.805	276.361	195.363	183.797	192.934	200.824
ENSDARG00000062549	290.736	-0.711145	0.17127	-4.15218	3.29317e-05	0.000740564	FALSE	371.62	452.733	438.83	398.143	229.867	286.08	222.911	276.751
ENSDARG00000055129	1192.23	0.386272	0.093111	4.14852	3.34638e-05	0.000751018	FALSE	1041.07	833.548	986.325	901.774	1297.6	1175.67	1149.5	1288.57
ENSDARG00000079403	58.6401	1.15496	0.278399	4.14858	3.34544e-05	0.000751018	FALSE	20.3648	34.3616	23.5009	23.4203	37.7217	58.6164	74.1955	57.3241
ENSDARG00000088745	73.6168	-1.40699	0.339168	-4.14836	3.34864e-05	0.000751018	FALSE	110.502	81.4807	107.606	117.695	48.4862	26.8953	48.0723	33.8829
ENSDARG00000019038	1149.55	0.396193	0.0955288	4.14737	3.36315e-05	0.00075226	FALSE	861.368	934.626	985.296	1024.06	1306.84	1417.46	1144.88	1145.24
ENSDARG00000007955	2188.92	-0.581974	0.14032	-4.14747	3.36172e-05	0.00075226	FALSE	2530.8	2590.59	2592.21	2456.57	1718.33	1734.03	1579.87	1761.88
ENSDARG00000093317	88.915	-1.41031	0.34005	-4.14737	3.36318e-05	0.00075226	FALSE	126.759	170.425	154.841	75.8811	49.4453	53.1871	64.9644	30.7719
ENSDARG00000043180	2187.14	-0.404927	0.0977603	-4.14204	3.44227e-05	0.000769264	FALSE	2573.35	2683.84	2802.18	2703.06	1944.3	2051.15	1983.81	2151.8
ENSDARG00000018461	1121.71	-0.29146	0.0704086	-4.13954	3.47995e-05	0.000776993	FALSE	1340.5	1194.89	1317.44	1238.86	1030.08	1007.2	1115.43	1003.92
ENSDARG00000057741	130.622	-0.697933	0.168805	-4.13454	3.55671e-05	0.000793425	FALSE	164.885	179.1	209.74	157.17	111.604	94.9241	111.168	121.383
ENSDARG00000075054	847.265	0.488475	0.118167	4.13376	3.56883e-05	0.000795421	FALSE	657.018	668.098	717.808	841.692	1087.53	1049.22	966.874	948.935
ENSDARG00000026369	5128.06	-0.400651	0.0970059	-4.13017	3.6249e-05	0.000806485	FALSE	5548.83	5837.31	5552.93	5763.86	4097.17	4265.69	4760.76	4075.26
ENSDARG00000045075	391.868	-0.461651	0.111775	-4.13019	3.62471e-05	0.000806485	FALSE	389.069	481.164	481.271	427.276	316.855	347.672	287.401	343.295
ENSDARG00000104004	229.972	1.335	0.323332	4.1289	3.64507e-05	0.000810252	FALSE	78.0985	115.32	74.6967	164.39	409.076	332.482	151.261	200.808
ENSDARG00000003203	871.124	0.759776	0.184305	4.12239	3.74967e-05	0.000832765	FALSE	513.427	661.445	602.592	676.641	1149.94	1046.46	627.002	1334.98
ENSDARG00000004964	403.184	-0.912812	0.221585	-4.11946	3.79761e-05	0.000842666	FALSE	468.748	462.44	618.468	581.044	233.778	365.02	238.749	296.481
ENSDARG00000070584	677.13	-0.723574	0.175715	-4.11788	3.82372e-05	0.000846961	FALSE	917.662	972.461	1006.07	1044.58	722.074	656.364	448.21	560.743
ENSDARG00000022614	103.404	1.27539	0.309711	4.11801	3.8215e-05	0.000846961	FALSE	76.4809	116.886	32.9734	38.9241	168.707	146.059	150.898	166.972
ENSDARG00000092361	59.8273	-1.17569	0.285905	-4.11218	3.91934e-05	0.000867374	FALSE	70.0815	96.1228	92.7801	72.8118	44.8715	53.0286	20.8991	28.9787
ENSDARG00000097202	23.2159	-6.47544	1.57548	-4.11015	3.95406e-05	0.000874288	FALSE	78.4913	86.8814	15.6588	90.9084	0	3.02864	0	0
ENSDARG00000100353	287.347	0.948423	0.231013	4.1055	4.03446e-05	0.000891278	FALSE	167.606	206.009	98.2612	170.54	447.312	274.756	267.071	248.191
ENSDARG00000011371	526.259	-0.468507	0.11429	-4.09926	4.1447e-05	0.000913217	FALSE	590.119	695.961	666.718	625.103	512.02	414.248	435.226	505.262
ENSDARG00000070892	62.8089	-1.53247	0.373809	-4.0996	4.13871e-05	0.000913217	FALSE	88.2468	46.5458	144.958	164.712	38.3773	39.3537	40.9263	35.4975
ENSDARG00000097231	41.9029	-2.06117	0.502799	-4.0994	4.1423e-05	0.000913217	FALSE	86.1904	64.3169	57.2318	43.4018	12.4827	8.07625	26.254	13.2467
ENSDARG00000019365	270.998	-0.715086	0.174518	-4.09748	4.17668e-05	0.000919456	FALSE	361.225	465.067	410.193	415.848	279.065	267.818	211.501	248.782
ENSDARG00000078339	42.7295	-1.41483	0.3455	-4.09501	4.22143e-05	0.000928492	FALSE	72.8982	63.2958	61.9442	90.2615	37.5746	25.251	23.0509	22.0639
ENSDARG00000075752	2329.61	0.296548	0.0724378	4.09383	4.24306e-05	0.000931863	FALSE	2027.18	2055.19	1968.5	2147.69	2636.44	2545.64	2252.46	2636.66
ENSDARG00000019765	1911.69	0.311347	0.0760539	4.09377	4.24419e-05	0.000931863	FALSE	1729.3	1708.35	1657.26	1691.92	2081.24	2288.46	2058.91	1989.66
ENSDARG00000021135	481.73	-0.450913	0.110216	-4.09117	4.29208e-05	0.000940569	FALSE	558.438	659.608	650.693	563.884	451.095	493.85	400.747	435.591
ENSDARG00000036045	270.435	-0.47517	0.11615	-4.091	4.29509e-05	0.000940569	FALSE	320.673	281.655	328.983	307.158	217.106	227.008	222.179	224.255
ENSDARG00000013856	483.685	-2.28173	0.55772	-4.09117	4.29206e-05	0.000940569	FALSE	705.598	948.661	1422.34	1200.68	258.652	344.039	88.7475	188.363
ENSDARG00000101145	201.742	0.638093	0.156006	4.09019	4.31028e-05	0.000943071	FALSE	164.28	153.733	167.135	173.097	245.328	252.242	250.922	277.001
ENSDARG00000058218	121.526	-0.832287	0.203703	-4.08578	4.39293e-05	0.000960317	FALSE	150.016	173.136	189.213	161.647	115.585	105.181	65.0914	92.8559
ENSDARG00000007366	167.172	-0.973626	0.238443	-4.08326	4.44084e-05	0.000969944	FALSE	274.457	253.049	271.031	321.705	149.963	147.417	137.465	135.75
ENSDARG00000103937	11981.7	0.273727	0.0670438	4.08281	4.44937e-05	0.000970961	FALSE	11342	11080.6	10175.4	11584.8	13860.6	13207.6	12936.3	13405.1
ENSDARG00000086150	442.928	-0.453337	0.111182	-4.07744	4.55336e-05	0.000992791	FALSE	465.704	520.864	519.194	534.768	393.748	393.343	381.199	323.71
ENSDARG00000090899	254.233	-2.46477	0.604565	-4.07694	4.56325e-05	0.000994083	FALSE	415.862	714.926	697.323	547.148	92.8559	142.393	100.376	94.6966
ENSDARG00000074301	1565.08	-0.392778	0.0963818	-4.07523	4.59695e-05	0.00100055	FALSE	1683.6	1759.39	1853.58	1935.12	1306.89	1263.07	1423.27	1519.84
ENSDARG00000000069	2395.06	-0.351446	0.0862464	-4.07491	4.60331e-05	0.00100082	FALSE	2597.31	2910.47	2626.62	2813.53	1932.45	2276.41	2330.28	2045.26
ENSDARG00000102296	10.5217	3.1631	0.776266	4.07476	4.60613e-05	0.00100082	FALSE	0	1.06984	3.01199	1.82632	8.52143	15.1347	23.3853	9.96577
ENSDARG00000010312	1003.27	-0.588307	0.144448	-4.07278	4.64545e-05	0.00100848	FALSE	857.575	801.651	1043.61	1174.82	617.756	605.141	655.585	703.679
ENSDARG00000027620	106.924	-0.782989	0.192385	-4.06991	4.70306e-05	0.00102	FALSE	115.244	151.232	138.777	144.49	60.6396	96.9502	80.73	82.7545
ENSDARG00000038009	46.3904	-2.23646	0.549534	-4.06974	4.70663e-05	0.00102	FALSE	67.2119	136.127	92.7862	87.7223	35.5163	25.2371	10.5039	9.93562
ENSDARG00000101164	104.246	-1.27708	0.313925	-4.06811	4.73965e-05	0.00102627	FALSE	202.857	203.752	181.238	195.136	59.6336	121.175	67.1333	75.041
ENSDARG00000060830	676.89	-0.447319	0.109984	-4.06711	4.75998e-05	0.00102975	FALSE	878.598	836.96	874.041	780.653	618.673	522.777	645.446	684.206
ENSDARG00000068478	4548.42	-0.482593	0.118663	-4.06692	4.76394e-05	0.00102975	FALSE	4240.28	4735.8	5678.11	5863.15	3316.42	3666.77	3614.85	4092.69
ENSDARG00000079456	120.477	0.911837	0.224422	4.06305	4.84351e-05	0.00104605	FALSE	66.2165	63.0639	63.8017	77.1363	149.74	119.254	79.262	162.05
ENSDARG00000010408	1002.35	0.313756	0.0772298	4.06263	4.85235e-05	0.00104706	FALSE	886.57	903.375	845.725	945.108	1130.39	1064.42	1160.91	1096.57
ENSDARG00000054890	2010.6	0.720505	0.177519	4.05875	4.9337e-05	0.00106369	FALSE	1740.1	1703.03	1751.66	1786.81	2958.06	2929.03	2784.67	2832.4
ENSDARG00000043198	28.7322	-2.69934	0.665365	-4.05693	4.97224e-05	0.00107108	FALSE	30.5917	112.345	15.971	97.2526	4.5664	19.2118	2.99895	12.6066
ENSDARG00000100324	60.9557	1.31079	0.323584	4.05085	5.10311e-05	0.00109833	FALSE	37.8861	19.3149	41.2551	31.5761	98.3646	56.5703	78.5325	88.2402
ENSDARG00000039929	7655.03	-0.581978	0.143682	-4.05046	5.1116e-05	0.00109921	FALSE	10103.3	9325.23	9961.96	9834.5	6074	7342.76	5637.3	7150.31
ENSDARG00000095432	275.053	-0.930671	0.229784	-4.0502	5.11741e-05	0.00109952	FALSE	394.881	333.221	361.897	374.719	227.127	146.339	141.958	252.883
ENSDARG00000028715	923.533	-0.301169	0.0743866	-4.04869	5.1504e-05	0.00110566	FALSE	995.097	1074.18	1015.4	1118.55	826.657	849.595	874.185	865.817
ENSDARG00000099299	1324.98	0.291251	0.0719578	4.04752	5.17628e-05	0.00110992	FALSE	1192.01	1151.42	1206.64	1268.83	1432.05	1535.76	1517.91	1413.16
ENSDARG00000102998	878.095	0.551368	0.136228	4.04739	5.1791e-05	0.00110992	FALSE	699.888	680.145	799.466	653.267	1012.12	1018.6	976.544	1144.83
ENSDARG00000077880	43.3846	-1.18484	0.292882	-4.04544	5.2225e-05	0.00111827	FALSE	83.915	89.7631	80.089	60.1208	17.9959	40.3047	44.5264	35.396
ENSDARG00000104208	243.896	0.480093	0.118684	4.04514	5.22914e-05	0.00111873	FALSE	213.307	180.08	177.65	194.422	240.968	274.585	252.069	296.957
ENSDARG00000022203	1437.27	0.426748	0.105563	4.04261	5.28593e-05	0.00112992	FALSE	1175.05	1173.13	1192.76	1206.04	1748.68	1462.13	1784.16	1385.64
ENSDARG00000101645	104.892	-1.12585	0.278607	-4.04102	5.32193e-05	0.00113664	FALSE	189.658	139.429	121.08	197.787	95.2762	74.7308	54.5246	71.7226
ENSDARG00000104587	7570.06	-0.329853	0.0816358	-4.04054	5.33291e-05	0.00113802	FALSE	8466.13	7850.81	7547.31	7607.09	6397.48	6268.39	5896.57	6471.85
ENSDARG00000093043	84.3749	-1.39686	0.346008	-4.03708	5.41205e-05	0.00115393	FALSE	116.99	138.223	166.086	163.812	61.3446	55.5093	51.5195	54.1086
ENSDARG00000006389	1536.46	0.270696	0.0670917	4.03471	5.46697e-05	0.00116464	FALSE	1384.2	1385.53	1316.54	1428.65	1676.29	1682.01	1562.01	1733.34
ENSDARG00000038834	1473.09	-0.276152	0.0684777	-4.03273	5.51321e-05	0.0011725	FALSE	1665.16	1754.04	1816.43	1661.35	1449.32	1452.92	1369.39	1425.44
ENSDARG00000019137	1393.58	-0.291254	0.0722192	-4.03291	5.50898e-05	0.0011725	FALSE	1522.05	1669.32	1563.23	1563.27	1257.4	1264.59	1353.65	1289.62
ENSDARG00000023151	2911.25	-1.64313	0.407485	-4.03237	5.5218e-05	0.00117334	FALSE	3608.81	3145.93	4906.61	4941.57	1235.63	1414.5	727.862	1938.26
ENSDARG00000100670	1160.24	0.447438	0.110971	4.03201	5.53016e-05	0.00117412	FALSE	890.43	995.325	1021.72	973.937	1354.57	1166.2	1401.71	1374.77
ENSDARG00000071211	494.032	-0.535421	0.132956	-4.02707	5.64762e-05	0.00119804	FALSE	536.787	518.578	629.657	632.506	340.772	423.372	412.98	424.862
ENSDARG00000078389	57.8616	-1.14942	0.285519	-4.02572	5.68001e-05	0.00120389	FALSE	57.2517	58.8395	94.572	100.801	43.8052	26.2146	35.9067	35.3788
ENSDARG00000103428	1565.2	-0.363278	0.0904126	-4.018	5.8694e-05	0.00124298	FALSE	1642.11	1834.82	1856.93	1996.84	1443.44	1445.62	1305.97	1509.31
ENSDARG00000102722	239.775	-1.70565	0.424838	-4.01483	5.94892e-05	0.00125876	FALSE	395.322	393.276	487.674	607.658	130.638	157.989	101.643	187.943
ENSDARG00000041873	26.0615	1.88672	0.47004	4.01395	5.97117e-05	0.0012624	FALSE	14.0638	12.7677	5.92691	3.16551	31.12	48.3582	18.3809	29.8274
ENSDARG00000030107	2470.95	0.342665	0.0855112	4.00725	6.14301e-05	0.00129717	FALSE	1961.54	2056.59	1859.91	2122.82	2587.84	2494.76	2479.17	2587.48
ENSDARG00000099851	244.874	-0.503668	0.125703	-4.0068	6.1546e-05	0.00129717	FALSE	325.919	308.15	320.346	314.444	187.56	218.282	261.328	228.213
ENSDARG00000077799	840.89	0.586311	0.146325	4.0069	6.15212e-05	0.00129717	FALSE	636.368	730.26	579.284	719.179	1056.86	940.087	899.067	1106.89
ENSDARG00000060992	110.163	-0.7474	0.186536	-4.00674	6.15631e-05	0.00129717	FALSE	154.693	139.411	190.096	152.673	99.0723	85.8324	91.2571	103.732
ENSDARG00000045442	1346.05	-1.50328	0.37522	-4.00639	6.1654e-05	0.001298	FALSE	2094.23	2893.11	2801.78	2733.96	821.581	1115.57	881.529	893.567
ENSDARG00000014945	1317.57	-0.273571	0.0682973	-4.00559	6.18616e-05	0.00130127	FALSE	1448.6	1380.43	1512.27	1496.44	1232.36	1157.93	1175.76	1265.89
ENSDARG00000098586	34.52	-1.8509	0.462181	-4.0047	6.20968e-05	0.00130513	FALSE	52.9916	64.119	66.0529	54.6438	15.1591	15.1144	15.8988	19.9105
ENSDARG00000093761	60.6536	1.62818	0.406756	4.00284	6.25878e-05	0.00131434	FALSE	20.366	21.4755	41.131	25.2232	94.7781	52.5518	82.5613	106.934
ENSDARG00000054447	293.83	-0.848073	0.211999	-4.00036	6.32459e-05	0.00132705	FALSE	337.857	433.618	483.732	388.628	252.922	199.037	245.898	216.147
ENSDARG00000104474	107.092	-0.941334	0.235355	-3.99963	6.34406e-05	0.00133002	FALSE	116.436	150.298	191.137	153.209	85.0341	71.7444	69.0151	93.7198
ENSDARG00000029057	561.681	0.451263	0.112931	3.99592	6.44425e-05	0.0013499	FALSE	501.386	511.557	538.574	494.792	696.411	638.041	784.939	679.333
ENSDARG00000102412	1666.52	-0.338175	0.0846546	-3.99476	6.47607e-05	0.00135501	FALSE	1799.51	2112.14	1986.46	1985.51	1442.36	1536.04	1668.89	1594.33
ENSDARG00000010791	1148.45	0.432077	0.108164	3.99463	6.47943e-05	0.00135501	FALSE	993.677	938.943	949.882	911.466	1280.05	1262.99	1266.78	1306.42
ENSDARG00000087788	57.0088	1.25001	0.312979	3.99389	6.49968e-05	0.00135811	FALSE	18.6929	34.1424	30.177	27.7855	58.795	53.6461	83.2302	71.0704
ENSDARG00000045946	782.241	-0.364654	0.0913766	-3.99068	6.58854e-05	0.00137553	FALSE	966.405	891.058	998.797	885.001	684.15	695.215	772.751	753.064
ENSDARG00000053973	5764.61	-1.96083	0.491472	-3.98971	6.61536e-05	0.00137998	FALSE	9333.36	9416.96	13944.7	15116.1	2949.16	3142.42	2338.49	3851.86
ENSDARG00000080675	790.402	-0.536837	0.134659	-3.98665	6.70121e-05	0.00139673	FALSE	1123.89	1217.4	1065.69	1020.11	832.769	757.77	722.309	737.229
ENSDARG00000017790	1076.91	0.273954	0.0687436	3.98515	6.74361e-05	0.00140323	FALSE	909.183	886.944	1000.83	994.502	1131.56	1188.48	1158.97	1112.32
ENSDARG00000017687	520.402	-0.749938	0.188176	-3.98531	6.73934e-05	0.00140323	FALSE	501.087	689.824	630.547	675.328	344.076	404.751	352.773	384.785
ENSDARG00000037838	2381.35	0.261163	0.0655619	3.98346	6.79202e-05	0.00141213	FALSE	1978.74	1876.21	1830.05	2032.18	2370.64	2269.61	2229.03	2378.09
ENSDARG00000101688	61.2458	-1.31073	0.329184	-3.98176	6.84064e-05	0.00142106	FALSE	105.049	66.4949	103.374	68.6424	27.906	20.1971	42.9939	47.4483
ENSDARG00000052696	290.856	-0.467626	0.117457	-3.98125	6.85532e-05	0.00142293	FALSE	367.357	317.939	358.381	363.075	269.643	247.174	261.334	238.006
ENSDARG00000058966	828.37	0.408433	0.102648	3.97895	6.92198e-05	0.00143558	FALSE	578.547	714.011	706.993	759.604	911.255	966.126	858.208	935.132
ENSDARG00000040568	359.744	-0.655194	0.164708	-3.97792	6.95204e-05	0.00144062	FALSE	370.693	495.793	538.358	406.997	262.988	315.37	279.231	294.355
ENSDARG00000068191	340.269	-0.472039	0.118801	-3.97337	7.08634e-05	0.00146724	FALSE	408.026	438.709	402.931	469.927	312.07	323.034	313.832	292.012
ENSDARG00000052712	6104.86	-0.319969	0.0805848	-3.97059	7.1695e-05	0.00148201	FALSE	6386.7	6667.12	6836.49	6558.23	5034.65	5717.36	5219.58	5217.94
ENSDARG00000054222	76.4004	-0.925138	0.232993	-3.97067	7.16705e-05	0.00148201	FALSE	100.164	82.6083	104.695	108.712	55.0763	45.5376	52.274	56.0049
ENSDARG00000055976	347.502	-0.389748	0.0982394	-3.96733	7.26817e-05	0.00150117	FALSE	413.592	383.533	391.105	439.518	323.19	304.348	327.979	286.662
ENSDARG00000069846	1155.89	-0.337868	0.085187	-3.96619	7.30315e-05	0.00150591	FALSE	1304.96	1366.15	1400.88	1302.2	955.501	1126.87	1083.07	1089.06
ENSDARG00000002394	100.071	-1.31458	0.331435	-3.96633	7.29866e-05	0.00150591	FALSE	181.312	182.163	185.817	159.269	75.7379	48.446	74.6403	86.1287
ENSDARG00000063436	671.833	0.445248	0.11238	3.96198	7.43295e-05	0.00153142	FALSE	553.963	579.958	596.832	615.888	815.997	758.056	777.082	847.612
ENSDARG00000088906	15.9961	3.03377	0.766017	3.96044	7.48105e-05	0.00154006	FALSE	0	0	2.95044	8.12557	28.9112	21.2163	12.5763	35.3112
ENSDARG00000097693	472.76	-0.459675	0.116092	-3.95958	7.50801e-05	0.00154239	FALSE	540.599	628.827	575.197	530.878	391.381	393.849	467.753	402.043
ENSDARG00000080018	128.355	-0.830188	0.209664	-3.9596	7.50743e-05	0.00154239	FALSE	152.761	167.502	210.59	158.56	87.0259	97.0162	109.746	94.8102
ENSDARG00000069264	216.412	-1.15143	0.290802	-3.9595	7.51081e-05	0.00154239	FALSE	264.841	252.305	276.321	273.929	115.993	94.99	103.5	166.48
ENSDARG00000032277	161.948	0.555587	0.140344	3.95874	7.53459e-05	0.00154601	FALSE	143.169	116.01	132.417	121.638	176.261	187.572	211.2	175.612
ENSDARG00000011640	5461.08	0.219597	0.055504	3.95642	7.60813e-05	0.00155982	FALSE	5022.29	4778.34	4731.73	4907.72	5752.73	5238.65	5863.28	5777.23
ENSDARG00000037852	320.981	-0.604023	0.152715	-3.95522	7.64647e-05	0.0015664	FALSE	434.112	483.163	437.471	391.91	320.126	297.216	242.531	288.357
ENSDARG00000101984	1678.77	0.552709	0.139798	3.95363	7.69746e-05	0.00157556	FALSE	1270.98	1307.13	1341.39	1434.16	2011.42	1978.77	1909.12	1955.96
ENSDARG00000104768	505.275	0.512374	0.129617	3.95297	7.71862e-05	0.0015786	FALSE	458.476	373.595	366.607	319.043	542.07	548.69	533.313	531.45
ENSDARG00000093522	19.079	2.8318	0.716455	3.95252	7.73333e-05	0.00158032	FALSE	11.7022	0	1.97866	4.52614	32.5487	34.3	17.8806	37.5406
ENSDARG00000029841	229.78	0.637015	0.161209	3.95148	7.76702e-05	0.00158591	FALSE	198.914	206.268	214.541	205.896	282.331	333.182	338.238	331.613
ENSDARG00000102340	3662.18	0.210028	0.0531581	3.951	7.78261e-05	0.00158651	FALSE	3190.52	3227.41	3216.41	3101.46	3836.5	3475.82	3832.45	3583.94
ENSDARG00000061355	585.314	-1.73031	0.437932	-3.95109	7.77948e-05	0.00158651	FALSE	964.73	848.75	1201.51	1292.02	379.896	348.505	237.718	332.014
ENSDARG00000101627	1802.99	-0.334089	0.0846171	-3.94825	7.87255e-05	0.00160355	FALSE	2167.27	2282.46	2238.97	1813.92	1629.71	1584.96	1797.24	1731.07
ENSDARG00000087290	37.6417	-2.31808	0.58727	-3.94722	7.90655e-05	0.00160916	FALSE	45.2937	55.7377	35.5334	77.7725	17.279	4.03796	7.35247	14.3513
ENSDARG00000028816	603.739	-0.41503	0.105209	-3.94482	7.98595e-05	0.001624	FALSE	710.769	826.096	739.582	666.153	493.567	532.879	645.629	535.577
ENSDARG00000092918	58.0592	1.61586	0.40967	3.94431	8.00316e-05	0.00162618	FALSE	17.5176	28.9511	5.91281	39.7594	98.0617	62.6025	78.6964	45.2492
ENSDARG00000070465	43.4603	3.89372	0.987916	3.94135	8.10259e-05	0.00164506	FALSE	3.18992	14.1021	0	7.24191	23.247	124.158	13.7526	218.673
ENSDARG00000020594	2820.89	-0.535039	0.135784	-3.94037	8.13576e-05	0.00164912	FALSE	2984.08	2940.6	2862.45	2885.91	2071.4	1934.14	1975.29	2074.95
ENSDARG00000104384	124.856	-0.725991	0.184236	-3.94054	8.1298e-05	0.00164912	FALSE	122.47	210.898	145.209	150.924	105.516	85.4691	94.9204	95.9452
ENSDARG00000105265	560.164	-1.3221	0.335544	-3.94017	8.14253e-05	0.00164916	FALSE	884.839	1043.91	1130.39	1076.66	371.032	406.054	428.456	448.978
ENSDARG00000070581	127.365	-0.872484	0.221602	-3.93716	8.24528e-05	0.00166862	FALSE	191.313	142.587	148.917	235.028	139.303	77.74	82.9331	91.6141
ENSDARG00000019877	176.329	-0.673666	0.171134	-3.93647	8.26873e-05	0.00167202	FALSE	240.292	208.777	250.991	194.916	132.797	155.348	132.773	139.221
ENSDARG00000086740	2896.89	-0.443464	0.112678	-3.93567	8.29643e-05	0.00167627	FALSE	3054.43	3203.58	3714.19	3894.19	2530.29	2561.08	2451.17	2658.99
ENSDARG00000040186	364.304	-0.462697	0.117597	-3.93461	8.33333e-05	0.00168237	FALSE	437.138	432.929	465.419	475.037	329.871	336.106	336.355	312.479
ENSDARG00000007745	6378.13	-0.261244	0.0664005	-3.93437	8.34164e-05	0.00168269	FALSE	7370.07	7290.68	7642.82	7204.02	5920.32	6402.46	6189.74	6107.9
ENSDARG00000034270	10347.1	-0.38119	0.0969525	-3.93172	8.43408e-05	0.00169997	FALSE	12455.4	12675.6	11826.6	12578.1	10100.4	10399.8	8370.41	9162.74
ENSDARG00000028259	465.296	-0.508375	0.129328	-3.9309	8.46291e-05	0.00170441	FALSE	477.783	623.963	582.044	575.392	384.882	431.295	419.575	354.069
ENSDARG00000026764	35.5557	-2.35861	0.600134	-3.93014	8.48969e-05	0.00170843	FALSE	57.9723	56.9173	141.925	55.5033	26.1926	12.2758	0	22.6449
ENSDARG00000101309	456.334	0.463654	0.118012	3.92888	8.53408e-05	0.00171485	FALSE	303.647	377.004	365.795	387.187	465.29	523.015	574.409	421.252
ENSDARG00000069446	67.1274	-0.93225	0.237283	-3.92885	8.53528e-05	0.00171485	FALSE	97.1227	65.6082	71.6065	63.7812	41.1277	35.5149	41.1944	36.1989
ENSDARG00000026403	616.124	0.872443	0.222187	3.92661	8.61532e-05	0.00172955	FALSE	225.611	476.646	281.352	408.284	725.598	549.693	643.149	635.105
ENSDARG00000013461	266.204	-0.464102	0.118216	-3.92587	8.64173e-05	0.00173128	FALSE	374.295	351.491	307.979	315.594	226.932	240.039	272.142	236.015
ENSDARG00000103271	1965.28	-0.471966	0.120222	-3.92579	8.64469e-05	0.00173128	FALSE	1990.28	2262.48	2203.77	2070.75	1400.66	1603.91	1414.62	1730.96
ENSDARG00000055388	330.535	-0.801054	0.204048	-3.92581	8.64377e-05	0.00173128	FALSE	464.295	487.846	474.157	554.909	280.644	304.922	250.829	301.31
ENSDARG00000078620	25.751	2.45107	0.624679	3.92372	8.71931e-05	0.00174484	FALSE	2.73713	11.1216	9.20868	7.62787	32.8091	65.2123	49.155	23.8638
ENSDARG00000012829	381.524	-1.60888	0.4103	-3.92123	8.80974e-05	0.00176153	FALSE	651.249	650.309	753.187	722.541	283.597	206.086	194.726	226.104
ENSDARG00000044937	5.37267	-4.74347	1.20984	-3.92075	8.82742e-05	0.00176365	FALSE	10.3096	18.1406	13.0619	12.7931	0.940039	1.00699	0	0
ENSDARG00000042090	10.5339	-2.30612	0.588573	-3.91815	8.92301e-05	0.00178133	FALSE	22.5819	31.5621	9.33734	25.6413	5.3776	4.0143	4.15164	4.3643
ENSDARG00000008785	6616.03	-0.252629	0.0644806	-3.91791	8.93196e-05	0.0017817	FALSE	7355.6	7425.43	7565.33	7404.8	6232.79	6583.78	5842.7	6313.52
ENSDARG00000057141	691.784	0.378272	0.0965982	3.91593	9.00564e-05	0.00179497	FALSE	609.924	586.16	590.638	606.07	846.786	770.158	755.001	736.006
ENSDARG00000071643	12.1374	3.05241	0.780021	3.91324	9.10664e-05	0.00181366	FALSE	2.92622	1.07127	3.95803	0.905441	31.6037	12.1096	12.6243	15.462
ENSDARG00000071353	8928.15	-0.362541	0.0926954	-3.9111	9.18752e-05	0.00182832	FALSE	9790.23	10419.3	10017.7	10668.6	7336.98	8384.31	7798.2	8292.51
ENSDARG00000053517	1331.85	0.291898	0.0746597	3.90971	9.24069e-05	0.00183308	FALSE	1086.82	1054.06	1143.95	1171.95	1387.89	1367.46	1392.99	1311.06
ENSDARG00000012763	679.027	0.421494	0.107803	3.90986	9.23491e-05	0.00183308	FALSE	523.034	547.765	577.819	577.058	887.144	691.634	703.643	702.857
ENSDARG00000043402	501.3	-0.499753	0.127818	-3.90988	9.23408e-05	0.00183308	FALSE	586.216	590.858	659.462	553.363	356.661	469.542	507.212	357.236
ENSDARG00000093476	118.018	1.11916	0.286247	3.90978	9.23797e-05	0.00183308	FALSE	55.0224	36.5875	65.7888	73.8376	131.734	98.9105	126.569	147.425
ENSDARG00000035326	800.327	-0.510933	0.13076	-3.90741	9.32915e-05	0.00184916	FALSE	844.363	837.196	863.39	818.294	591.5	583.511	592.281	592.788
ENSDARG00000103054	1206.32	-0.53281	0.136461	-3.90449	9.44229e-05	0.00187011	FALSE	1287.09	1545.35	1391.59	1545.62	1149.54	990.622	899.925	949.024
ENSDARG00000059903	133.648	0.621914	0.15934	3.90306	9.4983e-05	0.00187972	FALSE	112.878	107.042	111.215	105.212	178.498	159.362	164.484	167.976
ENSDARG00000098865	52.4722	1.59757	0.409401	3.90223	9.53119e-05	0.00188474	FALSE	21.9895	27.8309	11.9161	30.8383	93.5429	47.405	57.9919	81.7781
ENSDARG00000086327	1722.51	0.303881	0.0778907	3.90137	9.56499e-05	0.00188993	FALSE	1578.16	1440.58	1497.36	1601.78	1989.48	1703.2	1921.35	1938.24
ENSDARG00000092687	91.5092	-0.790365	0.20268	-3.89957	9.63653e-05	0.00190257	FALSE	113.138	108.554	148.328	120.301	49.6498	78.2747	79.9726	76.7931
ENSDARG00000013000	1476.87	-0.273629	0.0702795	-3.89345	9.88299e-05	0.00194969	FALSE	1584.59	1619.33	1703.66	1790.36	1387.48	1385.23	1375.16	1399.01
ENSDARG00000099580	7.37948	5.44485	1.39867	3.89288	9.90622e-05	0.00195274	FALSE	0	0	0.993053	0	1.90611	12.0927	12.6496	30.9236
ENSDARG00000012355	36.9137	-1.47249	0.378294	-3.89245	9.92355e-05	0.00195462	FALSE	59.3663	72.4531	55.659	69.0246	13.5805	16.2719	22.1556	41.1
ENSDARG00000102234	195.718	-0.95563	0.245545	-3.89188	9.94718e-05	0.0019562	FALSE	291.061	264.497	244.709	258.836	136.49	118.724	143.021	147.931
ENSDARG00000086218	14.0646	-3.035	0.779795	-3.89205	9.94014e-05	0.0019562	FALSE	30.4188	30.7854	34.2692	38.5485	0	11.9862	0	4.36869
ENSDARG00000054530	1192	-0.318859	0.0819344	-3.89164	9.95686e-05	0.00195657	FALSE	1342.9	1327.99	1341.94	1285.67	943.73	1095.89	1125.54	1083.25
ENSDARG00000101561	1558.03	-0.23662	0.0608125	-3.89097	9.98452e-05	0.00196047	FALSE	1666.49	1668.21	1701.07	1681.61	1419.11	1444.35	1414.52	1424.24
ENSDARG00000042881	176.814	0.68887	0.177193	3.88768	0.000101207	0.00198564	FALSE	128.661	101.801	116.61	130.3	186.978	188.742	192.362	200.961
ENSDARG00000078094	162.883	0.609132	0.15671	3.88701	0.000101485	0.00198955	FALSE	110.795	135.179	118.953	120.038	208.137	175.751	146.672	210.705
ENSDARG00000093602	12.7607	3.3727	0.867837	3.88632	0.000101773	0.00199365	FALSE	0	2.13962	3.0151	0.913918	28.374	14.1264	1.06394	22.1422
ENSDARG00000088861	29.3819	-1.32864	0.341903	-3.88602	0.000101901	0.00199458	FALSE	57.35	66.0251	34.2679	40.3173	26.058	20.9392	17.5523	13.494
ENSDARG00000058782	76.298	-0.984774	0.253454	-3.88542	0.000102154	0.00199799	FALSE	78.1336	64.5645	81.0931	87.7527	29.834	35.9046	51.6995	41.1617
ENSDARG00000041724	118.155	-0.792375	0.20414	-3.88153	0.000103803	0.00202864	FALSE	191.286	151.182	177.757	154.38	101.086	74.4921	102.532	110.923
ENSDARG00000102555	591.567	-0.617772	0.159237	-3.87958	0.000104637	0.00204336	FALSE	563.314	654.211	688.356	704.167	427.092	468.616	382.135	424.751
ENSDARG00000086996	233.184	-0.602674	0.155365	-3.8791	0.000104845	0.00204424	FALSE	324.908	281.573	229.441	284.283	150.366	180.998	194.763	209.598
ENSDARG00000009153	140.373	-3.1038	0.800099	-3.87926	0.000104773	0.00204424	FALSE	170.695	292.799	422.313	416.35	34.6451	92.9082	8.38853	15.448
ENSDARG00000054184	63.2038	-1.26253	0.325593	-3.87764	0.000105474	0.0020549	FALSE	87.524	115.008	74.7078	91.7703	42.5259	39.4605	17.8188	54.1209
ENSDARG00000040781	56.9228	1.55921	0.402397	3.87481	0.000106708	0.00207733	FALSE	27.8365	25.7866	44.5467	6.34744	62.5262	66.7881	100.778	76.3679
ENSDARG00000078399	707.957	0.354874	0.0915913	3.87454	0.000106826	0.00207772	FALSE	632.99	563.141	603.126	605.853	793.385	806.948	656.18	816.462
ENSDARG00000056079	485.918	0.359705	0.0928417	3.87439	0.000106894	0.00207772	FALSE	398.642	429.64	432.886	389.225	557.033	495.239	507.099	558.293
ENSDARG00000043719	343.101	-0.953322	0.246104	-3.87365	0.000107215	0.00208235	FALSE	298.083	380.217	425.939	457.874	204.087	189.029	172.434	242.561
ENSDARG00000004633	99.9924	0.807597	0.208646	3.87066	0.000108539	0.00210643	FALSE	77.4842	84.2756	61.3335	62.8567	140.745	119.294	109.076	128.775
ENSDARG00000046091	53.6881	-1.207	0.311855	-3.87039	0.00010866	0.00210715	FALSE	61.2106	94.4222	67.7961	86.6212	48.2045	36.3651	18.8513	30.8857
ENSDARG00000056239	763.717	-0.468913	0.121207	-3.86869	0.000109423	0.0021203	FALSE	847.318	928.046	949.012	917.975	642.267	622.786	615.305	754.069
ENSDARG00000096579	39.0234	2.28412	0.590767	3.86637	0.000110467	0.00213888	FALSE	8.85673	4.27847	11.0997	2.75465	28.0339	23.2318	32.0379	46.2527
ENSDARG00000068493	101.866	-1.50676	0.389885	-3.86461	0.000111265	0.00215268	FALSE	109.626	122.174	167.918	116.7	27.8194	56.5256	54.6436	43.0595
ENSDARG00000102808	2633.55	-0.375623	0.0973058	-3.86023	0.000113281	0.00218998	FALSE	3374.51	3774.87	3252.93	3124.6	2713.93	2555.26	2625.36	2529.82
ENSDARG00000002779	103.084	-0.901843	0.233795	-3.85741	0.000114596	0.00221369	FALSE	112.983	132.682	122.344	107.114	55.2757	58.4857	85.497	55.2714
ENSDARG00000044809	659.113	-0.473836	0.122885	-3.85594	0.000115288	0.00222404	FALSE	625.202	786.744	783.318	775.193	535.892	495.231	550.226	562.082
ENSDARG00000104810	259.906	0.548658	0.142291	3.85589	0.000115309	0.00222404	FALSE	180.346	213.392	244.066	243.354	354.103	343.723	347.679	250.873
ENSDARG00000078118	1240.82	0.394128	0.102221	3.85565	0.00011542	0.00222448	FALSE	1140.17	1014.05	950.26	1123.2	1404.58	1371.79	1460.06	1315.46
ENSDARG00000044935	1076.23	-0.435586	0.113068	-3.85244	0.000116947	0.00225096	FALSE	1236.42	1266.82	1427.97	1209.39	909.602	1045.76	810.079	1036.7
ENSDARG00000086458	143.305	0.610833	0.158563	3.85229	0.000117016	0.00225096	FALSE	115.203	129.799	111.148	105.625	173.36	172.708	172.923	185.349
ENSDARG00000086418	304.364	-1.08234	0.280967	-3.8522	0.000117063	0.00225096	FALSE	290.893	302.567	322.035	424.114	112.938	96.632	220.846	203.602
ENSDARG00000052816	1379.97	-0.3845	0.0998515	-3.85071	0.000117774	0.00226288	FALSE	1529.84	1521.99	1919.17	1784.56	1195.94	1296.56	1377.3	1310.72
ENSDARG00000089217	94.0283	-0.884902	0.229832	-3.85021	0.000118015	0.00226404	FALSE	133.165	104.978	128.674	90.5574	66.062	53.4816	64.186	62.9559
ENSDARG00000019492	629.816	-1.20265	0.312357	-3.85026	0.000117994	0.00226404	FALSE	912.195	996.636	1150	1213.27	419.124	503.668	464.535	469.256
ENSDARG00000104537	5385.21	-0.313253	0.0813852	-3.84901	0.000118596	0.00227345	FALSE	6190.45	6037.97	6250.2	5861.36	4683.49	4978.05	5003.85	4923.45
ENSDARG00000102019	133.088	1.23107	0.319902	3.84827	0.000118955	0.00227859	FALSE	73.3857	61.046	152.313	70.8459	314.777	226.159	149.112	143.114
ENSDARG00000058243	720.197	0.383018	0.0995973	3.84566	0.000120227	0.00230119	FALSE	563.771	570.121	624.087	624.428	730.773	844.358	788.273	746.722
ENSDARG00000096829	405.949	0.597327	0.155444	3.84273	0.000121675	0.00232714	FALSE	238.383	362.223	397.983	257.822	430.558	540.572	460.349	475.77
ENSDARG00000077479	13.937	-2.45674	0.639694	-3.84049	0.00012279	0.00234668	FALSE	17.7276	24.0037	17.1191	68.2899	1.7948	8.46237	5.36546	7.90903
ENSDARG00000097816	15.6979	-2.48741	0.647911	-3.83912	0.000123478	0.00235802	FALSE	33.6746	31.078	42.5861	25.3691	5.74642	7.06666	4.21116	6.63007
ENSDARG00000094713	12.5249	2.57269	0.671016	3.83402	0.000126064	0.00240558	FALSE	1.46297	2.14263	2.96802	7.24293	29.6931	17.1556	11.5711	27.61
ENSDARG00000016687	6303.23	-0.364281	0.0950409	-3.83289	0.000126646	0.00241374	FALSE	7432.07	7511.03	7571.86	7697.18	5968.52	6245.21	5094.8	6163.35
ENSDARG00000043722	246.844	-1.71841	0.448341	-3.83282	0.000126684	0.00241374	FALSE	338.053	625.568	544.446	508.052	123.495	180.624	142.06	166.781
ENSDARG00000086133	39.5361	1.17698	0.307293	3.83016	0.00012806	0.00243809	FALSE	27.8093	13.9245	20.7934	19.9262	37.3266	38.3433	63.1484	45.2869
ENSDARG00000020387	270.534	-0.595221	0.155421	-3.82974	0.000128281	0.00244045	FALSE	331.707	352.419	398.58	373.956	239.357	272.728	250.959	202.098
ENSDARG00000098791	118.819	-1.05802	0.276407	-3.82778	0.000129304	0.00245806	FALSE	144.37	207.034	215.415	167.017	104.014	85.8487	68.1221	94.8816
ENSDARG00000061543	2767.35	0.1968	0.0514622	3.82416	0.000131217	0.00249254	FALSE	2458.59	2411.35	2434.51	2516.82	2779.67	2768.33	2926.18	2784.79
ENSDARG00000051912	190.917	-1.17338	0.306875	-3.82364	0.000131497	0.00249406	FALSE	238.117	192.577	258.061	267.669	88.0731	100.124	106.175	130.155
ENSDARG00000095512	52.1394	-1.49948	0.392156	-3.82369	0.000131467	0.00249406	FALSE	105.255	67.7255	120.219	137.725	42.032	27.8359	35.3445	47.0479
ENSDARG00000069937	735.154	-0.294621	0.0770955	-3.82151	0.000132638	0.00251381	FALSE	871.572	924.612	892.456	838.657	754.379	660.853	761.812	698.739
ENSDARG00000076716	278.23	0.640847	0.167725	3.82082	0.000133006	0.00251888	FALSE	241.63	248.428	172.387	198.484	277.732	308.957	383.864	369.939
ENSDARG00000105104	195.663	-0.667741	0.17482	-3.8196	0.00013367	0.00252954	FALSE	212.61	232.789	228.952	305.995	173.971	153.969	122.243	168.386
ENSDARG00000103643	463.525	-0.536229	0.140451	-3.8179	0.000134591	0.00254452	FALSE	521.657	564.572	588.021	507.985	293.604	401.553	394.189	419.988
ENSDARG00000095783	23.7479	-1.42647	0.373639	-3.81777	0.000134665	0.00254452	FALSE	33.4931	28.9799	50.0376	31.558	8.68876	13.1345	17.7875	14.3361
ENSDARG00000055014	389.689	0.474682	0.124425	3.815	0.000136182	0.00256857	FALSE	308.346	335.473	331.754	407.015	475.025	550.146	414.977	486.87
ENSDARG00000051957	591.558	0.580073	0.152053	3.81493	0.000136219	0.00256857	FALSE	459.552	544.912	518.167	521.472	786.136	756.709	942.297	572.897
ENSDARG00000053744	68.4844	-0.970311	0.254348	-3.81489	0.000136244	0.00256857	FALSE	74.4446	76.1505	76.6678	115.052	65.2113	43.6652	32.216	35.5842
ENSDARG00000068398	93.4169	0.931625	0.244309	3.81331	0.000137116	0.00258306	FALSE	55.3773	58.6483	68.0356	67.7012	114.054	115.758	126.477	122.099
ENSDARG00000016074	499.378	-0.39906	0.104707	-3.81121	0.000138289	0.0026032	FALSE	643.572	554.443	645.172	576.915	493.564	473.981	415.224	449.432
ENSDARG00000055075	1604.89	0.360664	0.0946393	3.81094	0.000138442	0.00260412	FALSE	1166.41	1421.89	1374.11	1412.67	1837.29	1660.03	1608.76	1800.12
ENSDARG00000069946	1736.19	-0.585086	0.153682	-3.80712	0.000140592	0.00264258	FALSE	2454.32	2187.23	2207.88	2726.73	1685.81	1748.74	1192.72	1759.08
ENSDARG00000029497	101.082	-0.915396	0.240595	-3.80472	0.000141964	0.00266636	FALSE	159.814	135.346	117.568	127.616	56.0883	73.0481	100.644	55.8902
ENSDARG00000098375	1050.57	-0.293206	0.0770721	-3.80431	0.0001422	0.0026688	FALSE	1169.74	1194.16	1168.88	1196.16	946.374	934.992	995.766	983.419
ENSDARG00000104028	1327.74	-0.278678	0.0733054	-3.8016	0.000143763	0.00269612	FALSE	1643.1	1560.81	1542.6	1465.46	1266.76	1217.78	1269.2	1363.54
ENSDARG00000035544	547.419	-1.27658	0.335862	-3.80091	0.000144165	0.00270165	FALSE	805.687	938.289	1064.02	909.826	345.228	418.039	312.632	459.092
ENSDARG00000057936	801.589	0.275805	0.0725838	3.79981	0.000144806	0.00271108	FALSE	693.112	691.729	671.579	675.657	804.299	830.078	848.459	823.204
ENSDARG00000043814	164.275	-0.710097	0.186883	-3.79968	0.000144885	0.00271108	FALSE	216.837	237.69	234.102	189.467	114.656	106.93	163.322	152.477
ENSDARG00000103810	94.3234	0.746458	0.196505	3.79868	0.00014547	0.00272	FALSE	65.8228	49.2839	65.2768	75.1343	95.8113	116.058	98.8611	119.269
ENSDARG00000099720	1760.21	0.378095	0.0995829	3.79678	0.000146585	0.0027388	FALSE	1403.73	1221.03	1450.32	1438.39	1785.96	1758.31	1893.41	1728.18
ENSDARG00000103878	3606.43	-1.38637	0.365479	-3.79329	0.000148665	0.0027756	FALSE	5667.25	5873.4	6948.55	6926.14	2697.67	2370.31	1784.9	2869.36
ENSDARG00000079056	3403.87	0.278856	0.0735246	3.79269	0.000149024	0.0027796	FALSE	2794.45	2906.13	2868.03	3282.28	3792.73	3399.27	3635.83	3558.04
ENSDARG00000105052	55.3652	-1.91433	0.504759	-3.79256	0.000149101	0.0027796	FALSE	46.9134	41.7454	65.5447	76.1923	20.9975	10.086	17.9259	12.1564
ENSDARG00000093549	24601.7	-0.427612	0.112788	-3.7913	0.000149861	0.00279168	FALSE	25410	25165.3	28772.7	28442	19047	22077.1	17285.4	21734.1
ENSDARG00000087016	124.871	-2.09651	0.553241	-3.78951	0.000150945	0.0028098	FALSE	145.757	195.273	156.26	166.944	39.5196	65.6572	12.5693	37.5055
ENSDARG00000014230	7252.82	-0.278636	0.0735372	-3.78905	0.000151222	0.00281287	FALSE	7737.11	7832.94	7519.21	8119.92	6402.83	6626.17	6166.27	6533.77
ENSDARG00000089802	17.8136	1.77106	0.467632	3.78729	0.000152296	0.00283075	FALSE	13.1182	8.58339	8.845	6.31684	26.0248	37.374	16.7592	43.0211
ENSDARG00000074546	196.886	1.22391	0.323189	3.78698	0.000152488	0.00283222	FALSE	109.054	115.989	146.776	54.9283	241.97	199.113	297.691	256.823
ENSDARG00000005359	5296.4	-0.249015	0.0657738	-3.78593	0.000153132	0.00284207	FALSE	5978.82	6141.2	6060.54	6131.01	4926.61	5177.64	4924	5432.18
ENSDARG00000078132	252.316	0.949135	0.250768	3.78491	0.000153763	0.00285167	FALSE	160.505	153.4	158.87	210.708	358.045	352.217	342.098	268.894
ENSDARG00000100338	14.281	1.76221	0.465681	3.78417	0.000154224	0.0028581	FALSE	7.85022	4.32621	6.85682	7.17591	24.7757	24.8947	19.1292	19.2083
ENSDARG00000038069	53.8203	-1.12031	0.296127	-3.78322	0.000154813	0.0028669	FALSE	55.4451	95.4505	135.875	76.7746	38.4877	43.4233	34.6069	51.8629
ENSDARG00000016867	1106.32	-0.399293	0.1056	-3.78118	0.000156089	0.00288839	FALSE	1148.6	1144.45	1283.09	1252.1	931.521	982.926	850.826	897.297
ENSDARG00000010437	318.541	0.54935	0.145302	3.78075	0.000156357	0.00289122	FALSE	243.686	266.783	240.408	261.935	452.299	375.334	315.718	338.616
ENSDARG00000099418	52.386	-1.27424	0.337098	-3.78003	0.000156807	0.0028959	FALSE	49.4526	77.3167	82.239	112.588	26.1193	34.3622	49.1099	24.2518
ENSDARG00000094666	26.7195	1.60975	0.425862	3.77998	0.000156841	0.0028959	FALSE	8.88508	8.56134	11.117	10.0982	43.5993	31.2983	30.9597	12.1152
ENSDARG00000096533	983.867	-0.364789	0.0965415	-3.77858	0.000157728	0.00291013	FALSE	1118.71	1059.14	1220.84	1180.63	806.233	814.198	1003.51	935.69
ENSDARG00000059059	988.533	0.326678	0.0864629	3.77825	0.000157935	0.0029118	FALSE	808.907	879.151	771.034	852.401	1145.59	1064.32	954.354	988.519
ENSDARG00000005320	110.567	-0.797459	0.211261	-3.77476	0.000160159	0.00295065	FALSE	133.106	153.21	157.252	136.688	85.2748	71.6534	96.7556	80.6164
ENSDARG00000103705	65.1425	1.11174	0.294626	3.7734	0.000161038	0.00296465	FALSE	26.1966	42.9433	29.4029	34.2452	81.1763	77.8083	53.3265	76.0771
ENSDARG00000086037	847.649	0.295696	0.0783836	3.77242	0.000161669	0.00297242	FALSE	761.46	718.629	797.183	774.808	898.09	979.609	943.564	926.842
ENSDARG00000053021	660.564	-0.33658	0.0892222	-3.77238	0.000161697	0.00297242	FALSE	801.208	770.921	796.876	723.845	567.724	583.973	669.646	626.929
ENSDARG00000071065	1750.16	-0.29064	0.0770522	-3.77199	0.000161949	0.00297487	FALSE	2110.98	1793.79	1957.86	1972.21	1625.8	1628.62	1520.29	1624.95
ENSDARG00000068830	139.797	-0.585395	0.155311	-3.76917	0.000163792	0.00300653	FALSE	197.53	171.781	186.694	181.233	145.732	113.013	120.52	110.461
ENSDARG00000040064	209.938	-0.4841	0.128453	-3.76871	0.000164096	0.00300772	FALSE	252.67	243.355	232.778	239.565	146.969	185.765	181.63	177.714
ENSDARG00000095026	6.57317	-3.35867	0.891171	-3.76883	0.000164017	0.00300772	FALSE	11.8064	19.2561	20.1036	10.9689	2.83666	2.01806	0	1.10698
ENSDARG00000016483	155.065	-0.594865	0.157852	-3.7685	0.000164232	0.003008	FALSE	169.081	187.297	182.781	174.803	127.254	109.591	126.682	109.332
ENSDARG00000056903	435.807	-0.334747	0.0888827	-3.76616	0.000165776	0.00303392	FALSE	516.359	502.355	513.628	496.713	395.386	404.556	442.618	365.138
ENSDARG00000013252	185.648	-0.596711	0.158447	-3.76599	0.000165889	0.00303392	FALSE	238.259	194.487	231.233	183.06	139.646	156.225	108.295	154.279
ENSDARG00000078717	509.055	0.429445	0.114047	3.76551	0.000166211	0.00303538	FALSE	440.276	405.367	400.599	425.12	540.713	557.655	612.812	537.922
ENSDARG00000022309	3532.3	-0.496187	0.131771	-3.76552	0.000166205	0.00303538	FALSE	4393.54	4299.37	4092.9	4185.68	2942.9	3045.02	2796.55	3247.76
ENSDARG00000012796	199.199	-0.5972	0.158626	-3.76484	0.000166658	0.00303912	FALSE	282.559	266.504	262.035	210.923	175.877	168.127	167.979	161.139
ENSDARG00000086518	67.2935	0.911439	0.242092	3.76485	0.000166652	0.00303912	FALSE	36.2692	38.5906	58.8901	36.7223	86.3744	89.1346	89.4826	55.2198
ENSDARG00000061896	294.197	-0.551559	0.146512	-3.76461	0.000166811	0.00303969	FALSE	314.691	386.11	342.233	379.332	222.929	222.526	302.89	224.056
ENSDARG00000068586	96.4087	-1.16959	0.310726	-3.76404	0.000167192	0.00304442	FALSE	151.654	144.819	174.087	189.578	95.354	74.7399	44.0148	79.4345
ENSDARG00000093357	628.552	0.366769	0.0974853	3.7623	0.000168357	0.00306341	FALSE	576.035	493.948	536.609	521.555	784.411	632.652	693.889	627.259
ENSDARG00000027009	1616.86	-0.312856	0.0831762	-3.76136	0.000168992	0.00307275	FALSE	1896.89	1801.67	2069.62	1953.72	1516.17	1622.16	1450.89	1629.54
ENSDARG00000079124	145.056	0.624427	0.166069	3.76004	0.000169889	0.00308681	FALSE	129.223	110.176	84.6647	88.1116	140.864	152.234	172.202	163.643
ENSDARG00000062085	343.056	-0.451023	0.119958	-3.75984	0.000170022	0.00308698	FALSE	368.655	433.515	401.735	405.972	319.211	278.812	269.1	312.148
ENSDARG00000098838	134.888	-0.548189	0.145898	-3.75733	0.000171734	0.00311582	FALSE	211.821	188.664	167.744	174.509	125.79	141.335	114.466	123.635
ENSDARG00000094820	35.0663	1.18931	0.316669	3.7557	0.000172859	0.00313397	FALSE	14.5646	20.2128	23.673	19.8253	45.5488	47.1116	43.9959	43.9248
ENSDARG00000092071	220.79	-0.738229	0.196634	-3.75433	0.000173807	0.00314888	FALSE	292.714	315.525	397.244	358.651	189.034	170.482	236.066	224.29
ENSDARG00000016010	1401.48	0.2637	0.0702776	3.75226	0.000175246	0.00317264	FALSE	1299.33	1367.26	1222.15	1204.93	1532.32	1486.11	1599.32	1492.19
ENSDARG00000070165	146.383	0.918521	0.244806	3.75204	0.000175402	0.00317318	FALSE	64.5592	72.6652	88.7638	98.172	115.412	178.402	139.66	186.718
ENSDARG00000055445	297.063	0.539786	0.143878	3.7517	0.000175639	0.00317518	FALSE	247.108	216.124	226.125	232.308	328.964	274.034	376.358	357.567
ENSDARG00000091306	2216.44	0.237312	0.0632883	3.7497	0.000177044	0.00319827	FALSE	1896.87	1973.96	1883.23	1956.18	2352.85	2155.76	2168.79	2415.24
ENSDARG00000086481	232.09	-0.603455	0.160996	-3.74826	0.000178068	0.00321446	FALSE	282.84	278.86	272.674	297.254	197.666	140.059	158.143	249.926
ENSDARG00000078133	3024.58	0.202165	0.0539609	3.74651	0.00017931	0.00323223	FALSE	2821.58	2763.62	2846.14	2884.43	3365.83	3241.61	3150.41	3261.27
ENSDARG00000094759	5.8624	-4.31375	1.15137	-3.74662	0.000179234	0.00323223	FALSE	24.9381	10.6281	17.0298	10.0287	0	0	3.18278	0
ENSDARG00000045306	360.984	-0.561312	0.149888	-3.74487	0.000180484	0.00325105	FALSE	381.201	477.935	481.706	498.728	313.582	286.353	327.444	322.206
ENSDARG00000103316	1278.01	0.30715	0.0820926	3.7415	0.000182923	0.00329262	FALSE	1050.43	989.972	958.957	1186.52	1282.14	1265.25	1309.67	1325.15
ENSDARG00000013050	301.05	-0.682831	0.182639	-3.7387	0.000184971	0.0033271	FALSE	382.193	425.697	389.908	377.351	214.043	240.556	251.822	276.049
ENSDARG00000027322	1779.87	0.305215	0.0816496	3.73811	0.000185406	0.00333253	FALSE	1733.17	1639.28	1685.1	1565.67	2183.73	2009.43	1985.96	1999.42
ENSDARG00000096722	57.9487	-0.941533	0.251913	-3.73753	0.000185834	0.00333782	FALSE	67.6505	89.797	87.9003	94.6069	38.92	45.3507	55.0374	38.7141
ENSDARG00000071565	149.489	-0.665873	0.178179	-3.73709	0.000186159	0.00334126	FALSE	200.767	230.346	148.514	168.112	93.4646	113.401	127.946	136.069
ENSDARG00000098950	71.7775	-1.16212	0.311005	-3.73664	0.000186494	0.00334489	FALSE	119.695	101.868	112.329	96.6814	29.8068	55.5355	65.0502	41.9373
ENSDARG00000062479	1041.44	0.31184	0.0834607	3.73637	0.000186699	0.00334618	FALSE	891.275	808.765	891.812	883.125	1114.31	998.28	1070.29	1130.82
ENSDARG00000017775	5988.88	-0.237041	0.0634481	-3.73598	0.000186984	0.00334889	FALSE	6971.02	6570.12	6325.15	6525.47	5570.94	5764.36	5805.31	5244.97
ENSDARG00000092610	1384.83	0.300058	0.0803516	3.73431	0.000188231	0.00336881	FALSE	1131.5	1172.53	1060.14	1155.46	1362.07	1403.92	1410.47	1387.87
ENSDARG00000057427	3363.97	0.402191	0.107716	3.73382	0.000188601	0.00337302	FALSE	3346.06	3033.72	2989.77	2835.41	4193.35	3336.74	4236.52	4358.94
ENSDARG00000076858	78.3259	-0.959754	0.257068	-3.73346	0.000188867	0.00337537	FALSE	89.9696	92.9702	125.814	99.7949	55.4867	65.5505	37.3047	51.8866
ENSDARG00000040432	620.307	-0.54915	0.147112	-3.73287	0.000189311	0.00338089	FALSE	851.657	661.736	749.499	835.756	485.765	522.203	517.55	591.94
ENSDARG00000016399	452.81	-0.520064	0.139359	-3.73183	0.000190097	0.00338785	FALSE	434.947	468.611	655.139	609.855	345.237	378.66	386.063	407.221
ENSDARG00000044047	100.922	-0.754667	0.202211	-3.73209	0.0001899	0.00338785	FALSE	119.03	174.898	121.557	105.635	72.5592	94.443	66.6445	74.1582
ENSDARG00000024503	42.578	-1.59264	0.426773	-3.73181	0.000190105	0.00338785	FALSE	47.094	82.2931	80.0234	89.224	24.6459	33.2532	13.7735	27.6536
ENSDARG00000076248	82.5207	-0.901326	0.24161	-3.7305	0.000191101	0.00340318	FALSE	108.255	135.295	126.893	110.763	59.5376	73.6787	65.8712	58.8398
ENSDARG00000057262	230.916	-0.790912	0.212081	-3.7293	0.000192014	0.003417	FALSE	299.023	313.201	273.571	313.338	206.977	181.786	163.54	140.127
ENSDARG00000017799	97.6193	-0.942946	0.25288	-3.72882	0.000192375	0.003421	FALSE	166.046	137.374	97.1709	136.177	65.6234	72.741	62.7957	77.1998
ENSDARG00000013430	31586.7	-0.375356	0.100669	-3.72862	0.000192531	0.00342135	FALSE	28916.6	29798.2	29763.9	28470.2	20445.7	23087.3	22345	24281.1
ENSDARG00000024602	149.039	-0.685897	0.184024	-3.72722	0.000193604	0.00343799	FALSE	207.454	170.436	213.162	157.34	109.452	105.999	114.475	134.678
ENSDARG00000096904	91.1337	1.14423	0.307156	3.72525	0.000195119	0.00346243	FALSE	36.5015	38.5987	46.3319	43.3808	65.3546	72.6964	112.297	115.889
ENSDARG00000012871	1986.23	-0.262425	0.0704506	-3.72495	0.000195355	0.00346416	FALSE	2367.28	2129.16	2172.66	2150.84	1746.43	1893.62	1976.01	1731.15
ENSDARG00000101544	97.8811	1.17115	0.314435	3.72461	0.000195616	0.00346634	FALSE	30.5803	61.18	51.9987	57.7055	113.922	173.78	91.029	78.2967
ENSDARG00000002305	2745.14	-0.329807	0.0886366	-3.72089	0.000198525	0.00351527	FALSE	3165.81	3160.37	3080.32	3268.93	2438.68	2563.97	2516.68	2566.53
ENSDARG00000102310	280.956	0.507775	0.136472	3.72072	0.000198658	0.00351527	FALSE	231.153	237.365	239.658	238.586	394.046	310.307	333.137	308.611
ENSDARG00000100576	11.2766	-2.05793	0.553329	-3.71918	0.000199874	0.0035343	FALSE	32.463	18.174	19.145	23.8433	8.44122	6.056	4.26863	3.30788
ENSDARG00000017773	190.111	-0.653054	0.175814	-3.71446	0.00020364	0.00359836	FALSE	229.991	264.082	212.752	260.486	162.301	164.703	130.73	157.676
ENSDARG00000068085	4.86204	5.44185	1.46589	3.71231	0.000205376	0.00362648	FALSE	0	0	0	0	27.0408	1.90206	4.79065	0.798904
ENSDARG00000020164	2847.85	0.200682	0.0540689	3.71161	0.000205947	0.00363263	FALSE	2593.65	2590.61	2664	2661.25	2986.31	2917.72	3103.46	3075.11
ENSDARG00000102156	19.1348	1.92043	0.517424	3.71153	0.000206014	0.00363263	FALSE	10.2022	10.7296	3.93052	6.31637	34.7047	32.3242	19.8996	28.68
ENSDARG00000055100	973.847	-0.345981	0.0932248	-3.71125	0.000206238	0.00363402	FALSE	1209.19	1133.24	1084.01	1074.29	845.08	796.067	959.959	937.489
ENSDARG00000042014	98.2372	0.803658	0.216564	3.71096	0.000206478	0.0036357	FALSE	77.2563	60.0823	61.9215	80.3182	107.944	134.343	119.417	125.756
ENSDARG00000042213	112.825	0.823585	0.221957	3.71055	0.000206806	0.00363891	FALSE	52.4205	72.9883	117.722	85.6524	140.001	152.565	142.289	153.282
ENSDARG00000067997	145181	-0.5462	0.147359	-3.7066	0.000210057	0.00369214	FALSE	178205	183436	169248	198391	127876	127076	115893	128582
ENSDARG00000095584	94.2967	0.678141	0.182959	3.70652	0.000210125	0.00369214	FALSE	52.3822	59.6203	61.9578	62.2718	100.842	94.3486	97.0507	87.666
ENSDARG00000055644	364.171	-0.864474	0.23332	-3.70509	0.000211313	0.00371041	FALSE	372.739	620.509	542.307	427.008	221.584	321.991	311.06	224.132
ENSDARG00000038475	1404.57	-0.521537	0.1408	-3.70411	0.000212135	0.00372223	FALSE	1690.29	1553.65	1407.56	1560.45	1215.49	1022.24	905.464	1183.29
ENSDARG00000035028	304.507	-0.657296	0.177497	-3.70314	0.000212944	0.00373381	FALSE	417.093	429.18	388.062	493.712	303.751	261.13	214.415	316.772
ENSDARG00000056640	1061.9	-0.298659	0.0807443	-3.69882	0.000216605	0.00379272	FALSE	1207.38	1297.37	1137.52	1358.07	1062.83	1074.74	1011.17	916.148
ENSDARG00000090381	165.71	-0.521664	0.141035	-3.69882	0.000216606	0.00379272	FALSE	210.019	210.242	238.091	213.985	173.32	128.264	150.938	155.568
ENSDARG00000089981	1377.69	0.285578	0.0772205	3.69821	0.000217126	0.00379918	FALSE	1311.37	1282.08	1211.29	1226.21	1516.51	1549.53	1483.89	1577.44
ENSDARG00000099156	692.286	0.279031	0.0754566	3.6979	0.000217394	0.00380121	FALSE	577.722	571.66	589.638	614.126	758.374	728.122	704.617	665.363
ENSDARG00000017571	2479.95	-0.360424	0.0975518	-3.6947	0.000220149	0.0038467	FALSE	2972.39	3177.1	3235	2927.66	2360.3	2554.75	2443.22	2232.46
ENSDARG00000041910	363.525	-0.531537	0.144075	-3.68932	0.000224855	0.00392346	FALSE	455.833	429.138	397.436	462.355	327.831	232.743	334.179	313.983
ENSDARG00000057426	169.791	0.577388	0.156496	3.68948	0.000224713	0.00392346	FALSE	118.042	121.25	139.508	130.827	182.232	186.879	206.303	187.517
ENSDARG00000079524	37.8688	1.37336	0.372301	3.68884	0.000225281	0.00392816	FALSE	19.903	23.1703	13.8542	25.0339	53.3809	68.0851	54.5844	35.7049
ENSDARG00000043923	1208.52	0.304133	0.082473	3.68766	0.000226323	0.00394359	FALSE	1111.98	1127.85	1006.71	992.299	1280.22	1172.83	1350.56	1424.9
ENSDARG00000099468	4.05075	5.25327	1.42522	3.68593	0.000227868	0.00396776	FALSE	0	0	0	0	0	5.03257	17.7157	7.68937
ENSDARG00000098392	2679.85	0.283548	0.0769416	3.68524	0.000228485	0.00397574	FALSE	2846.79	2592.13	2478.15	2584.05	3245.97	3200.82	3171.26	3155
ENSDARG00000033009	22309.2	0.279643	0.0758978	3.68446	0.000229187	0.00398518	FALSE	21423.1	20582	20510.6	20060.7	24733.7	25115.8	25141.3	25244.2
ENSDARG00000099336	248.007	-0.572065	0.155292	-3.6838	0.000229787	0.00399285	FALSE	266.999	303.78	270.71	298.477	183.944	183.674	201.021	199.345
ENSDARG00000058734	1228.07	-0.461763	0.125372	-3.68315	0.000230372	0.00400024	FALSE	1191.48	1409.15	1346.77	1367.04	980.687	928.154	1018.35	933.751
ENSDARG00000062198	2726.65	0.189713	0.0515153	3.68264	0.000230827	0.00400536	FALSE	2485	2425.58	2435.31	2521.81	2772.17	2836.01	2783.19	2863.88
ENSDARG00000002021	1149.17	-0.333872	0.09067	-3.68227	0.000231164	0.00400844	FALSE	1245.58	1373.63	1422.71	1187.92	1059.28	1007.21	1018.56	1065.42
ENSDARG00000094089	10.5001	-2.21182	0.600781	-3.68156	0.000231808	0.00401682	FALSE	12.5864	12.7522	26.7152	23.7621	2.93941	2.18858	6.94131	4.78529
ENSDARG00000100792	315.81	-1.98224	0.538642	-3.68006	0.000233178	0.00403779	FALSE	448.031	463.88	623.767	712.526	149.917	165.742	81.5117	171.973
ENSDARG00000022631	803.786	-0.835426	0.227196	-3.67712	0.00023588	0.00408175	FALSE	1041.1	1294.83	1068.03	1345.03	532.701	773.66	666.47	689.53
ENSDARG00000040534	4550.53	-1.01192	0.275242	-3.67649	0.000236465	0.00408905	FALSE	6306.4	5945.6	6297	5624.41	3056.34	3128.5	2840.71	2961.44
ENSDARG00000096587	8.59621	4.64749	1.26424	3.67612	0.00023681	0.0040922	FALSE	0	0	0	0	10.1288	6.75682	1.75019	2.45879
ENSDARG00000098350	613.418	0.364785	0.0992533	3.67529	0.000237578	0.00410264	FALSE	472.707	522.312	578.866	530.161	616.844	665.5	716.195	718.34
ENSDARG00000059399	56.9237	1.15051	0.313117	3.67439	0.000238418	0.00411431	FALSE	49.5668	30.3214	25.0203	37.2085	69.6251	101.179	69.893	68.8109
ENSDARG00000080009	2427.68	0.258373	0.0703572	3.6723	0.000240379	0.00414529	FALSE	2061.66	2327.59	2086.04	2253.51	2803.13	2441.91	2689.94	2510.69
ENSDARG00000090348	93.0461	-0.846111	0.230427	-3.67193	0.000240724	0.00414765	FALSE	123.758	134.175	153.992	126.214	109.123	62.6442	50.2141	77.1902
ENSDARG00000094328	111.239	-0.874262	0.238102	-3.6718	0.000240846	0.00414765	FALSE	128.998	88.9767	143.799	142.305	48.44	75.9823	82.6244	69.9415
ENSDARG00000016233	393.597	-0.422379	0.115062	-3.67087	0.00024173	0.00416001	FALSE	465.433	414.524	455.462	387.65	338.819	328.946	267.324	347.935
ENSDARG00000037978	132.368	1.17429	0.320001	3.66964	0.000242892	0.00417714	FALSE	49.4851	63.34	73.5143	68.4936	157.506	170.772	125.482	123.49
ENSDARG00000068290	43.3281	-1.85232	0.504916	-3.66857	0.000243911	0.0041918	FALSE	70.0186	63.2825	84.6377	60.5031	13.4764	20.1982	8.38714	35.3081
ENSDARG00000053453	1471.55	0.302434	0.0824607	3.66761	0.000244829	0.00420469	FALSE	1129.26	1379.01	1240.21	1311.03	1594.36	1549.11	1525.28	1576.66
ENSDARG00000003584	671.207	-0.436972	0.119159	-3.66714	0.000245277	0.0042095	FALSE	742.804	819.791	660.894	814.047	546.864	550.273	552.944	593.572
ENSDARG00000058038	514.96	-0.761066	0.207559	-3.66675	0.000245656	0.004213	FALSE	560.572	648.895	585.717	573.471	337.088	358.039	333.081	369.753
ENSDARG00000099359	33.1317	-1.36145	0.371314	-3.66658	0.000245817	0.004213	FALSE	33.448	54.7694	49.9168	73.8475	22.2557	18.1924	27.1623	15.4322
ENSDARG00000088044	55.7939	-0.880392	0.240126	-3.66638	0.000246009	0.00421341	FALSE	80.2541	79.3615	95.5159	65.9391	44.2566	38.3735	35.6579	56.2778
ENSDARG00000057414	5065.99	-0.285827	0.0780211	-3.66346	0.000248827	0.00425877	FALSE	5548.67	5514.55	5780.29	5398.94	4384.84	4337.17	4924.11	4599.63
ENSDARG00000074738	54.0836	-1.02688	0.280406	-3.66212	0.000250141	0.00427689	FALSE	87.4358	61.1621	87.4329	89.3208	29.8915	28.2846	51.3122	50.7393
ENSDARG00000097728	116.7	-2.3852	0.651333	-3.66203	0.000250227	0.00427689	FALSE	277.409	185.088	215.964	262.412	39.0536	31.2571	62.298	47.538
ENSDARG00000035074	312.226	0.358934	0.0980759	3.65976	0.000252453	0.004312	FALSE	303.895	277.472	272.561	275.531	358.259	359.791	363.812	362.674
ENSDARG00000103612	1083.67	-0.353695	0.0966766	-3.65854	0.000253654	0.00432956	FALSE	1128.29	1147.85	1203.83	1206.69	925.89	961.972	858.426	922.986
ENSDARG00000092951	14.4569	2.92679	0.801722	3.65063	0.000261601	0.00446217	FALSE	0	0	3.98291	5.45114	21.9253	16.1435	14.7908	24.3369
ENSDARG00000001897	801.771	-0.312953	0.08574	-3.65002	0.000262219	0.0044636	FALSE	878.077	756.988	915.199	905.445	675.258	697.989	695.671	714.238
ENSDARG00000026376	649.038	-0.523008	0.143278	-3.65031	0.000261928	0.0044636	FALSE	877.009	1029.15	835.564	825.321	673.385	560.684	633.329	614.327
ENSDARG00000035452	220.344	-0.697046	0.190962	-3.65018	0.000262052	0.0044636	FALSE	286.379	294.482	325.658	326.955	218.569	237.086	162.608	143.875
ENSDARG00000043818	1049.69	-0.467439	0.1281	-3.64902	0.000263241	0.00447796	FALSE	1426.96	1279.04	1217.15	1317.64	806.235	1004.89	1079.46	898.167
ENSDARG00000071462	165.458	-0.851604	0.233434	-3.64816	0.000264129	0.00448697	FALSE	181.935	251.211	264.662	228.917	119.816	139.446	130.714	124.593
ENSDARG00000037067	78.2123	-1.1098	0.304199	-3.64828	0.000264001	0.00448697	FALSE	77.5194	117.856	144.382	120.389	42.1619	43.3963	46.2717	82.8238
ENSDARG00000098628	13.8955	-2.06705	0.566794	-3.64691	0.000265411	0.00450571	FALSE	26.382	19.2691	46.6539	11.789	5.72912	4.03469	6.32489	8.8403
ENSDARG00000011989	3918.32	0.311899	0.0855691	3.645	0.000267394	0.00453323	FALSE	3763.03	3185.16	3014.66	3341.51	4230.46	3990.67	4172.24	4111.63
ENSDARG00000074225	916.708	0.342066	0.0938453	3.645	0.000267392	0.00453323	FALSE	683.207	775.165	836.126	818.102	963.395	926.36	1006.29	1057.79
ENSDARG00000041870	1022.94	0.337136	0.0925073	3.64442	0.000267994	0.00454033	FALSE	905.958	854.85	836.764	825.794	1128.37	1056.19	1035.24	1100.07
ENSDARG00000009142	5179.72	0.298686	0.0819699	3.64385	0.000268586	0.00454728	FALSE	3957.8	4112.49	3962.37	4557.74	5314.81	4776.62	5127.54	5192.76
ENSDARG00000097057	4665.56	0.223121	0.0612434	3.64318	0.00026929	0.00455613	FALSE	4584.06	3968.42	3932.19	4255.24	4889.59	4802.01	4826.35	5007.84
ENSDARG00000098080	2788.57	0.325131	0.0892591	3.64255	0.000269945	0.00456413	FALSE	2152	2288.36	2251.17	2180.45	2869.98	2730.4	2748.16	2767.36
ENSDARG00000013346	2352.99	0.20873	0.0573114	3.64204	0.000270487	0.00456714	FALSE	2156.22	2105.05	2260.43	2238.49	2541.58	2491.41	2475.27	2620.78
ENSDARG00000100719	181.754	-0.617379	0.169512	-3.6421	0.00027042	0.00456714	FALSE	168.301	205.411	259.408	217.677	138.172	139.397	151.647	127.709
ENSDARG00000059956	250.753	-0.635462	0.174512	-3.64137	0.000271196	0.00457579	FALSE	304.743	308.958	394.345	341.217	227.339	220.184	169.756	252.64
ENSDARG00000076076	118.648	0.681188	0.187078	3.64121	0.000271365	0.00457579	FALSE	91.7787	83.3735	74.906	102.119	172.301	122.119	144.599	125.026
ENSDARG00000078748	10964.6	0.249437	0.0685223	3.64024	0.000272386	0.00458993	FALSE	10476	9466.79	9955.52	10026.2	11211	12801.2	11631.5	11811.8
ENSDARG00000002971	537.452	0.292646	0.0803959	3.64006	0.000272576	0.00459003	FALSE	518.014	470.264	472.248	465.837	577.116	617.443	567.649	590.94
ENSDARG00000063254	1468.01	0.306715	0.0842758	3.63942	0.000273253	0.00459527	FALSE	1316.51	1360.94	1360.99	1338.14	1617.86	1616.53	1801.91	1615.6
ENSDARG00000094297	44.0857	1.67017	0.45891	3.63942	0.000273249	0.00459527	FALSE	14.1827	21.3868	25.9279	7.02521	65.708	66.7459	41.9311	43.4101
ENSDARG00000017772	10370.6	-0.336349	0.0924337	-3.63881	0.000273897	0.00460302	FALSE	10618.1	10627.7	12640.8	11639.8	8669.02	9214.05	8771.17	9409.15
ENSDARG00000037455	1055.36	-0.346634	0.0953384	-3.63583	0.000277091	0.00465357	FALSE	1115.49	1309.06	1296.04	1169.02	922.054	905.564	1006.13	1015.24
ENSDARG00000095897	3001.77	-0.205734	0.0565947	-3.63522	0.000277738	0.00466132	FALSE	3203.18	3052.86	3224.3	2972.38	2677.71	2793.46	2672.35	2648.87
ENSDARG00000104839	1417.99	-0.30755	0.0846363	-3.63378	0.000279299	0.00468437	FALSE	1537.33	1661.71	1729.9	1459.57	1350.79	1201.16	1194.2	1416.94
ENSDARG00000074779	773.879	0.365163	0.100507	3.63322	0.000279907	0.0046883	FALSE	601.352	756.209	580.065	625.03	837.749	779.656	820.185	863.988
ENSDARG00000094408	89.5685	2.75332	0.7578	3.6333	0.000279814	0.0046883	FALSE	18.8552	23.8133	29.1787	10.7401	116.699	171.32	124.434	144.047
ENSDARG00000096889	220.551	0.544639	0.149923	3.6328	0.000280362	0.00469279	FALSE	193.034	174.14	157.527	196.17	261.73	267.021	286.777	234.403
ENSDARG00000042899	98.5541	-0.774184	0.213126	-3.63252	0.000280663	0.0046947	FALSE	123.824	136.32	117.65	116.069	80.1519	84.2474	67.9639	56.7246
ENSDARG00000023058	5389.58	0.314899	0.0867059	3.63181	0.000281439	0.00470454	FALSE	4515.25	4414.93	4599.77	4996.2	6354.06	5507.32	5419.61	5767.13
ENSDARG00000095921	2100.71	-0.349082	0.0961978	-3.62879	0.000284754	0.00475677	FALSE	2319.26	2226.06	2197.08	2260.15	1640.92	1828.28	1881.57	1716.79
ENSDARG00000001578	2160.9	-0.217176	0.0598588	-3.62814	0.000285471	0.00476559	FALSE	2408.41	2306.4	2384.94	2362.41	1995.64	2124.19	2069.47	1948.25
ENSDARG00000102943	202.474	0.539839	0.148891	3.62573	0.00028815	0.00480711	FALSE	176.316	155.592	136.534	157.88	267.129	218.2	191.619	229.424
ENSDARG00000101418	29.1977	1.31692	0.363263	3.62525	0.000288677	0.00481269	FALSE	17.529	21.4396	14.7994	9.94559	41.294	47.4488	30.4521	37.5315
ENSDARG00000086851	190.008	-0.600651	0.165755	-3.62373	0.000290388	0.00483799	FALSE	217.735	247.043	264.756	202.55	134.508	138.135	160.281	183.189
ENSDARG00000102482	561.825	-0.447637	0.123537	-3.6235	0.000290645	0.00483907	FALSE	675.389	502.338	702.999	685.446	440.918	517.954	443.835	478.96
ENSDARG00000015966	894.753	-0.284166	0.0784403	-3.6227	0.000291547	0.00485086	FALSE	1006.78	959.705	1013.32	889.538	788.729	769.827	845.152	770.368
ENSDARG00000087994	144.999	0.53065	0.146499	3.62221	0.000292095	0.00485675	FALSE	116.993	111.434	97.8774	104.082	159.105	146.342	156.667	156.806
ENSDARG00000102866	3.07359	-5.61427	1.55004	-3.62202	0.000292307	0.00485706	FALSE	2.91007	5.28503	18.7866	9.90132	0	0	0	0
ENSDARG00000023768	58.9534	-0.840487	0.232113	-3.62103	0.000293437	0.00487261	FALSE	70.0039	86.8868	92.4761	74.0348	42.3695	49.4882	41.9256	47.4422
ENSDARG00000098012	86.2607	0.87513	0.241698	3.62076	0.000293735	0.00487432	FALSE	45.1785	48.2844	67.7939	42.4076	127.264	66.6697	93.2075	87.1412
ENSDARG00000045681	126.307	-0.737658	0.20375	-3.62041	0.000294137	0.00487778	FALSE	141.378	178.451	203.145	123.945	78.5007	103.372	103.315	103.788
ENSDARG00000061635	1608.61	0.421479	0.116491	3.61812	0.000296754	0.00491792	FALSE	1398.95	1334.75	1385.41	1496.8	2218.08	1767.05	1853.44	1682.66
ENSDARG00000031647	988.183	-0.315122	0.0871151	-3.61731	0.000297679	0.00493	FALSE	1021.48	1118.69	1118.82	1073.08	827.141	900.724	841.564	915.495
ENSDARG00000094670	24.0297	1.58435	0.438324	3.61456	0.00030086	0.00497938	FALSE	5.86507	12.8439	11.9205	5.44303	29.5799	16.137	35.858	27.6295
ENSDARG00000017165	269.976	-0.475784	0.131666	-3.61357	0.000302015	0.00499519	FALSE	323.125	299.517	342.118	367.719	257.013	265.754	187.188	249.188
ENSDARG00000099487	212.832	0.664008	0.183797	3.61272	0.000302999	0.00500817	FALSE	134.972	158.562	167.66	206.755	282.461	232.177	276.397	271.28
ENSDARG00000055226	369.593	-0.327038	0.0905368	-3.61221	0.000303601	0.00501257	FALSE	373.231	418.399	414.913	422.416	334.329	319.175	337.373	311.1
ENSDARG00000073974	145.38	0.597286	0.165355	3.61215	0.000303665	0.00501257	FALSE	122.46	105.139	133.703	119.137	184.042	213.123	181.248	147.825
ENSDARG00000042840	1881.03	0.285901	0.0792494	3.60761	0.000309031	0.00509779	FALSE	1601.75	1649.3	1583.27	1666.72	2051.09	2026.37	1913.11	1936.23
ENSDARG00000055592	674.943	-0.572037	0.15862	-3.60633	0.000310555	0.00511956	FALSE	994.197	1022.44	895.515	932.292	682.28	639.378	661.038	602.319
ENSDARG00000045851	65.7342	-1.06901	0.296558	-3.60474	0.000312466	0.00514768	FALSE	86.0514	102.975	113.147	111.058	50.0682	55.5471	36.6873	55.1663
ENSDARG00000033537	420.61	0.495489	0.137539	3.60254	0.000315127	0.00518811	FALSE	362.861	404.369	374.736	300.02	508.844	511.39	508.449	502.451
ENSDARG00000033845	3449.29	0.300516	0.0834332	3.60187	0.000315936	0.00519801	FALSE	2809.78	3168.65	3047.48	3447.75	3968.62	3986.54	4044.24	3371.71
ENSDARG00000026926	1201.43	0.478663	0.132945	3.60046	0.000317651	0.00522281	FALSE	1110.91	995.6	951.26	1091.95	1410.08	1420.19	1433.4	1517.03
ENSDARG00000038868	346.918	0.41772	0.116032	3.60005	0.000318159	0.00522773	FALSE	319.786	257.314	270.155	296.462	358.427	360.443	407.254	398.449
ENSDARG00000031952	3336.66	0.602759	0.167481	3.59896	0.000319486	0.00524321	FALSE	2766.54	2534.04	2621.05	2242.76	3657.09	3616.06	4472.89	3686.88
ENSDARG00000094821	31.6595	-1.15799	0.321758	-3.59894	0.000319519	0.00524321	FALSE	35.1053	35.3559	42.5283	66.0816	21.0787	21.1932	22.0858	16.5651
ENSDARG00000075542	7004.25	0.216523	0.0601814	3.59784	0.000320866	0.00526187	FALSE	6035.35	6142.45	6210.78	6605.92	7833.9	6720.74	7160.85	7332.94
ENSDARG00000011573	259.249	-0.724817	0.201492	-3.59724	0.000321607	0.00527057	FALSE	323.721	362.478	303.679	266.083	153.946	162.073	215.802	228.18
ENSDARG00000070923	485.244	-0.498428	0.138639	-3.59514	0.000324212	0.0053098	FALSE	698.107	649.626	532.675	586.156	382.477	447.775	444.127	469.736
ENSDARG00000074676	780.478	0.322293	0.0896573	3.59473	0.000324733	0.00531485	FALSE	721.975	622.639	741.161	702.123	912.99	852.827	836.645	882.098
ENSDARG00000055339	1397.47	-0.25576	0.0711791	-3.59319	0.000326649	0.00534273	FALSE	1492.63	1659.78	1548	1493.54	1199.94	1293.94	1407.84	1288.44
ENSDARG00000095082	325.774	-1.3197	0.367569	-3.59036	0.000330226	0.0053977	FALSE	440.869	404.157	478.38	392.55	158.952	179.986	170.284	178.273
ENSDARG00000098658	16.0585	-2.02425	0.563967	-3.5893	0.000331565	0.00541606	FALSE	21.9086	31.089	28.6059	10.8486	5.76313	4.03832	6.29956	6.62295
ENSDARG00000090722	657.997	-0.711923	0.198385	-3.58859	0.000332465	0.00542724	FALSE	903.123	817.24	1141.78	996.361	556.015	647.79	547.324	605.31
ENSDARG00000086654	43.5313	-2.13161	0.594159	-3.5876	0.000333733	0.00544439	FALSE	44.192	39.5319	65.1574	74.766	9.45838	5.03807	16.9808	19.9062
ENSDARG00000079914	73.989	-0.807285	0.225342	-3.58248	0.000340344	0.00554863	FALSE	94.7335	101.932	78.6083	93.842	41.4539	56.5675	50.2719	62.875
ENSDARG00000007807	759.502	0.308444	0.0861043	3.58222	0.000340688	0.00555062	FALSE	661.078	662.262	630.788	596.861	831.323	823.448	730.276	768.617
ENSDARG00000043716	454.741	0.369619	0.103218	3.58095	0.000342348	0.00557405	FALSE	369.88	417.929	336.95	363.737	513.999	452.181	504.523	450.498
ENSDARG00000087625	202.16	-0.701626	0.196008	-3.57958	0.000344142	0.00559962	FALSE	296.846	328.956	258.002	219.009	179.257	144.326	121.957	231.89
ENSDARG00000042927	377.424	-0.409374	0.114399	-3.57846	0.000345618	0.00562	FALSE	494.304	418.818	435.484	415.78	303.837	320.599	360.099	341.483
ENSDARG00000036671	3177.85	-0.325359	0.0909693	-3.57658	0.000348119	0.005657	FALSE	3403.58	3139.25	3654.18	3345.57	2537.09	2994.25	2539.19	2738.48
ENSDARG00000099412	1038.08	-0.262189	0.0733175	-3.57608	0.000348785	0.00566048	FALSE	1065.96	1189.9	1200.92	1231.98	1013.14	983.405	1000.81	918.21
ENSDARG00000089107	34.7582	-1.17759	0.329286	-3.57619	0.00034864	0.00566048	FALSE	37.8462	42.9403	62.746	60.389	16.4236	28.2927	19.8708	26.4631
ENSDARG00000058366	607.189	0.377427	0.105623	3.57332	0.000352482	0.00571462	FALSE	510.473	467.084	510.856	526.088	673.019	672.308	640.874	630.512
ENSDARG00000098741	36.9013	-1.57275	0.440145	-3.57325	0.000352577	0.00571462	FALSE	35.1756	54.5961	76.4316	61.6648	17.1877	4.0347	28.4617	27.6259
ENSDARG00000001559	847.674	0.473829	0.132626	3.57268	0.000353344	0.00572335	FALSE	655.865	681.643	670.727	857.169	1046.71	846.431	980.863	1111.41
ENSDARG00000096046	86.1191	-1.12087	0.313829	-3.57161	0.000354795	0.00574314	FALSE	106.184	136.764	156.925	96.0495	37.6634	60.4937	88.3929	41.9683
ENSDARG00000104841	184.538	-0.654645	0.183314	-3.57117	0.000355395	0.00574914	FALSE	252.178	311.14	269.312	212.077	154.204	178.786	205.315	124.653
ENSDARG00000045142	75.0246	2.60633	0.730574	3.56752	0.000360379	0.00582601	FALSE	19.3468	38.0908	13.4096	20.6497	96.4433	45.4694	319.776	96.1273
ENSDARG00000005926	2519.18	-0.187693	0.0526444	-3.56529	0.000363453	0.00586437	FALSE	2765.68	2602.99	2658.61	2579.97	2263.61	2412.64	2343.38	2286.65
ENSDARG00000053485	6491.96	-0.242582	0.0680393	-3.56532	0.000363419	0.00586437	FALSE	6409.5	6507.46	7053.95	7086.38	5785.53	5885.15	5464.81	5739.86
ENSDARG00000101757	213.96	1.10245	0.309209	3.56537	0.000363337	0.00586437	FALSE	71.296	93.4106	131.277	99.1098	216.558	247.587	135.893	251.366
ENSDARG00000026024	423.8	-0.337617	0.0947008	-3.56509	0.000363725	0.00586446	FALSE	520.771	503.039	527.524	447.909	411.019	410.021	361.702	396.115
ENSDARG00000071904	77.9054	0.880682	0.247039	3.56495	0.000363927	0.00586446	FALSE	36.5197	64.6981	42.8823	57.9156	101.484	110.636	91.1221	71.3016
ENSDARG00000098831	893.839	-0.466721	0.131074	-3.56076	0.000369789	0.00595509	FALSE	1127.99	986.07	1038	969.395	812.362	874.865	669.284	622.751
ENSDARG00000104370	191.004	0.670309	0.188263	3.5605	0.000370152	0.00595712	FALSE	105.369	95.3342	93.0532	94.1856	162.742	159.433	117.859	175.618
ENSDARG00000094840	63.1233	-1.62796	0.457296	-3.55998	0.000370881	0.00596503	FALSE	135.323	95.325	118.57	124.712	27.6464	38.3035	26.0022	61.6472
ENSDARG00000078508	624.796	0.352074	0.0990108	3.55592	0.000376663	0.00605413	FALSE	606.141	558.254	533.221	658.553	722.852	753.351	811.278	717.221
ENSDARG00000103266	555.925	-0.689571	0.193998	-3.55453	0.000378658	0.0060823	FALSE	673.742	763.767	837.101	822.459	534.496	542.359	329.09	515.233
ENSDARG00000010144	1430.26	0.284708	0.0802221	3.54899	0.000386705	0.00620759	FALSE	1240.04	1258.21	1175.25	1267.13	1527.71	1471.26	1537.16	1481.88
ENSDARG00000104654	21.8103	-1.66185	0.468602	-3.54641	0.000390524	0.00626487	FALSE	34.5111	36.3498	35.2763	30.1241	10.114	6.03149	17.0252	9.98533
ENSDARG00000027744	1245.69	0.714143	0.201512	3.54393	0.000394211	0.00631999	FALSE	706.24	793.867	1217.74	750.798	1552.07	1221.58	1256.97	1663.32
ENSDARG00000044685	265.619	-0.755937	0.213361	-3.543	0.000395608	0.00633832	FALSE	235.945	289.78	416.118	293.08	129.331	189.938	237.559	176.453
ENSDARG00000029064	2333.91	-0.257984	0.0728819	-3.53975	0.0004005	0.0064126	FALSE	2640.24	2428.86	2581.12	2512.37	1998.94	2250.24	2145.38	2102.05
ENSDARG00000005578	1502.83	-0.535366	0.151659	-3.53006	0.000415464	0.00664795	FALSE	1806.33	2028.47	1933.59	2164.77	1339.47	1375.13	1298.43	1462.47
ENSDARG00000042484	1822.59	0.278919	0.0790503	3.52838	0.000418116	0.00668186	FALSE	1624.24	1555.18	1584.83	1612.67	2020.29	1920.72	1888.23	1906.4
ENSDARG00000087916	236.333	0.472258	0.13384	3.52853	0.000417869	0.00668186	FALSE	183.567	227.194	192.136	184.232	274.77	275.225	231.474	311.72
ENSDARG00000024443	1343.32	0.294378	0.0834803	3.52631	0.000421387	0.00672984	FALSE	1088.59	1073.98	1109.47	1206.02	1410.01	1413.69	1382.41	1288.71
ENSDARG00000041110	704.692	-0.301621	0.0855564	-3.52541	0.000422834	0.00674436	FALSE	816.661	882.837	805.311	763.512	614.471	674.512	721.188	640.774
ENSDARG00000007130	736.267	-0.366574	0.10398	-3.52541	0.000422823	0.00674436	FALSE	930.955	880.356	831.641	818.407	672.01	627.089	777.513	604.806
ENSDARG00000100350	54.4528	-1.12274	0.318637	-3.52358	0.000425762	0.00678675	FALSE	69.9468	77.2582	89.3933	93.8297	31.8214	39.3967	54.452	26.4724
ENSDARG00000045153	390.96	-0.576743	0.163721	-3.52273	0.000427134	0.0067959	FALSE	502.213	455.338	422.362	525.896	288.816	406.795	300.159	280.931
ENSDARG00000097206	88.0609	0.944342	0.268072	3.52272	0.000427149	0.0067959	FALSE	41.3315	73.8014	49.4374	49.5798	114.037	135.359	76.8902	87.0031
ENSDARG00000090104	4.3465	4.99413	1.41763	3.52287	0.000426908	0.0067959	FALSE	0	0	0	0	13.1254	7.90938	4.14731	0
ENSDARG00000104916	124.08	-0.776344	0.220396	-3.52249	0.000427516	0.00679742	FALSE	142.483	148.553	201.321	172.046	123.875	109.377	76.3907	78.2668
ENSDARG00000045465	1528.89	0.232334	0.0659849	3.52102	0.000429892	0.00682842	FALSE	1342.35	1449.24	1355.02	1313.18	1618.28	1642.31	1550.73	1601.76
ENSDARG00000056464	659.477	0.487758	0.138531	3.52095	0.00043001	0.00682842	FALSE	667.005	597.835	401.551	446.28	734.872	709.466	774.061	733.282
ENSDARG00000074760	298.934	-0.511379	0.145262	-3.52039	0.000430912	0.00683841	FALSE	370.464	418.538	344.08	430.5	298.851	281.699	233.895	283.063
ENSDARG00000014259	1762.18	0.223994	0.0636331	3.52008	0.00043141	0.00684199	FALSE	1607.59	1667.52	1641.38	1564.03	1821.68	2016.82	1891.95	1837.93
ENSDARG00000035732	555.406	0.478628	0.136007	3.51914	0.000432941	0.00686187	FALSE	425.391	500.417	461.301	407.881	715.7	594.475	580.707	609.544
ENSDARG00000058108	392.663	-0.622723	0.176968	-3.51884	0.000433435	0.00686187	FALSE	531.654	544.591	494.598	471.564	365.745	334.269	275.444	350.389
ENSDARG00000099353	40.9105	1.33257	0.3787	3.51881	0.000433485	0.00686187	FALSE	29.7733	22.8971	28.0407	30.2193	48.6811	40.4748	77.3912	124.991
ENSDARG00000093137	56.7625	0.908802	0.258358	3.51761	0.000435446	0.00688857	FALSE	28.1529	41.2123	28.653	40.1079	71.1398	62.1834	73.2688	54.5794
ENSDARG00000100952	1053.76	-0.485367	0.138029	-3.51641	0.000437429	0.00691122	FALSE	991.958	885.091	1040.61	950.115	626.834	771.84	684.241	679.858
ENSDARG00000099207	89.834	1.42122	0.404163	3.51644	0.000437368	0.00691122	FALSE	62.8905	43.9579	47.018	24.3162	68.5912	94.6024	85.9742	238.679
ENSDARG00000036481	1208.48	-0.531267	0.151207	-3.51351	0.000442221	0.00698253	FALSE	1200.52	1356.9	1390.69	1267.95	810.434	925.538	893.483	981.331
ENSDARG00000089507	820.415	-0.314634	0.0895868	-3.51206	0.000444643	0.00700752	FALSE	925.371	903.478	929.359	973.515	752.096	683.88	861.844	703.734
ENSDARG00000019579	1443.33	0.323939	0.0922292	3.51232	0.000444209	0.00700752	FALSE	1350.4	1249.18	1200.94	1332.32	1622.05	1467.69	1665.43	1667.53
ENSDARG00000001993	5922.16	-0.58442	0.166396	-3.51223	0.000444363	0.00700752	FALSE	7934.69	8694.91	7752.62	6350.03	4770.73	4923.26	5761.58	5039.46
ENSDARG00000060962	198.858	1.12327	0.31985	3.51188	0.000444946	0.0070079	FALSE	156.749	135.82	81.3312	141.194	275.95	277.933	308.079	257.657
ENSDARG00000019498	983.678	-0.335665	0.0956161	-3.51055	0.000447176	0.00703472	FALSE	1070.19	1029.88	1092.47	1135.54	775.519	911.047	784.818	960.898
ENSDARG00000089477	351.551	-0.509217	0.145054	-3.51053	0.00044721	0.00703472	FALSE	409.882	549.899	431.823	343.352	318.784	308.418	333.556	254.282
ENSDARG00000100912	26.7103	-1.26593	0.36124	-3.50441	0.000457624	0.00719403	FALSE	37.6063	39.9441	37.9932	41.8385	16.9687	20.7985	10.3471	17.3581
ENSDARG00000017489	105.071	1.04477	0.298149	3.50419	0.000458004	0.00719549	FALSE	60.9258	73.3329	60.1205	27.7284	119.028	105.842	109.001	121.976
ENSDARG00000101422	169.23	0.555451	0.158592	3.50238	0.000461117	0.00723986	FALSE	108.073	125.097	112.701	145.621	164.187	204.961	187.382	169.256
ENSDARG00000074210	49.552	2.19452	0.626956	3.50028	0.000464778	0.00729277	FALSE	16.6036	12.0696	19.4757	12.7393	27.3487	97.0148	53.0947	100.949
ENSDARG00000019644	14983	-0.254511	0.072735	-3.49915	0.00046674	0.00731897	FALSE	17177.3	15424.1	17273	16195.2	12467	13797.9	14297.8	14821.5
ENSDARG00000091989	32.5129	-1.80979	0.517656	-3.49613	0.000472066	0.00739786	FALSE	54.1903	42.8331	38.6619	58.9069	6.69222	10.0886	14.7457	24.3053
ENSDARG00000018478	2741.29	-1.02453	0.293115	-3.49533	0.000473467	0.00741519	FALSE	3325.22	4649.48	4107.82	4201.88	1728.75	2129.43	1628.8	2518.72
ENSDARG00000003519	381.645	-0.558562	0.159857	-3.49413	0.000475605	0.00744401	FALSE	416.903	618.278	477.614	500.729	403.595	273.269	354.993	336.755
ENSDARG00000094683	29.0256	1.3571	0.388494	3.49323	0.000477208	0.00746445	FALSE	9.74384	17.8638	8.21442	13.9597	29.4847	32.7644	28.6086	35.7205
ENSDARG00000096913	41.8006	1.00369	0.287355	3.49287	0.000477868	0.00747011	FALSE	18.2903	26.0355	24.05	27.855	54.2964	58.7255	41.5713	40.5457
ENSDARG00000075164	874.957	-0.435075	0.124641	-3.49063	0.000481886	0.0075267	FALSE	1062.2	1031.06	961.333	950.49	679.247	733.594	730.479	818.279
ENSDARG00000021241	208.643	0.489697	0.140293	3.49052	0.000482088	0.0075267	FALSE	181.817	181.388	192.583	169.459	222.066	248.742	275.172	273.081
ENSDARG00000037061	522.096	-0.347111	0.0994627	-3.48986	0.000483265	0.00753719	FALSE	555.517	613.453	644.002	578.963	460.401	470.724	495.602	456.166
ENSDARG00000033738	7624.37	-0.383859	0.109994	-3.48981	0.000483361	0.00753719	FALSE	9197.83	8602.89	9126.64	7919.83	6346.84	7015.44	6540.82	6800.5
ENSDARG00000043997	16.1366	-1.85376	0.531247	-3.48946	0.000484003	0.0075425	FALSE	28.5117	18.9819	29.3283	23.1479	2.83141	8.93923	6.20519	9.77855
ENSDARG00000027290	1140.23	0.237951	0.068209	3.48855	0.000485646	0.00755871	FALSE	1061.34	1074.18	950.572	1027.26	1243.85	1207.13	1174.02	1220.75
ENSDARG00000017049	2044.36	-0.338117	0.0969174	-3.48872	0.000485348	0.00755871	FALSE	2360.48	2549.53	2349.01	2441.33	1880.65	1879.99	1902.77	2011.62
ENSDARG00000038248	267.404	-0.881781	0.252922	-3.48637	0.000489621	0.00761585	FALSE	411.275	323.948	253.82	366.564	247.474	135.335	194.955	156.67
ENSDARG00000059503	180.911	-0.524704	0.150511	-3.48615	0.000490033	0.00761754	FALSE	194.015	224.168	254.91	250.146	175.185	155.525	142.586	171.025
ENSDARG00000006290	2331.51	-0.270548	0.077614	-3.48581	0.000490656	0.00761777	FALSE	2696.78	2677.94	2621.35	2441.18	2197.42	2216.49	2119.61	2114.93
ENSDARG00000010482	30.2129	-1.99099	0.571161	-3.48587	0.00049054	0.00761777	FALSE	23.808	48.7671	123.117	50.4181	10.733	8.66902	18.1625	25.4134
ENSDARG00000038716	14765.2	0.355001	0.10187	3.48485	0.000492405	0.00762604	FALSE	13824.6	13812.5	11695.9	13664.4	17807.4	17100.2	16352	16520
ENSDARG00000045141	995.527	-0.472859	0.135684	-3.48501	0.000492123	0.00762604	FALSE	1232.6	1232.02	1301.95	1221.35	891.117	907.242	784.313	1011.86
ENSDARG00000004167	247.196	-0.528857	0.151745	-3.48516	0.000491839	0.00762604	FALSE	337.023	298.031	303.693	313.911	192.787	206.935	210.841	257.32
ENSDARG00000005221	421.065	-0.634084	0.181936	-3.48519	0.000491785	0.00762604	FALSE	526.726	572.141	656.103	587.05	362.065	451.005	324.078	372.793
ENSDARG00000013025	403.295	-0.379894	0.109056	-3.48346	0.000494973	0.00766108	FALSE	465.666	516.416	453.694	489.297	325.734	333.474	428.649	393.602
ENSDARG00000102237	29.7368	1.83193	0.525972	3.48294	0.000495932	0.00767119	FALSE	3.75546	2.09189	8.27137	11.7	20.6582	19.327	30.0386	29.377
ENSDARG00000061478	9475.59	0.262709	0.0755331	3.47806	0.000505053	0.00780746	FALSE	8227.63	8167.47	7502.47	8047.94	10166.1	8527.54	9795.71	9834.54
ENSDARG00000063144	3973.49	0.232858	0.0670101	3.47497	0.000510907	0.00788823	FALSE	3373.95	3453.61	3675.46	3598.87	4188.96	3975.18	4191.46	4222.59
ENSDARG00000071230	1141.1	0.270718	0.0779034	3.47505	0.00051076	0.00788823	FALSE	1020.38	1050.49	962.241	1098.22	1279.34	1123.02	1295.73	1288.38
ENSDARG00000079004	1875.63	0.236639	0.0681106	3.47433	0.000512136	0.00790234	FALSE	1676.19	1567.05	1661.89	1756.5	1960.62	1913.4	1907.92	2069.89
ENSDARG00000013144	11732.7	-0.362857	0.104452	-3.47391	0.000512935	0.0079098	FALSE	12092.2	12739.5	12011.3	12020.3	9092.49	10126.5	9128.8	9649.7
ENSDARG00000032653	250.785	0.475616	0.136966	3.47252	0.000515595	0.00794594	FALSE	175.21	190.204	213.288	221.393	296.387	277.091	269.329	274.315
ENSDARG00000074024	18.3851	2.4619	0.709131	3.47171	0.000517153	0.00796504	FALSE	14.6315	4.28858	3.95637	0	43.162	20.1973	8.41576	46.4051
ENSDARG00000018653	536.309	-0.476153	0.137173	-3.47118	0.000518176	0.0079759	FALSE	644.907	545.616	728.751	703.017	484.717	548.968	421.795	429.021
ENSDARG00000061274	213.835	-0.598935	0.172558	-3.47092	0.00051868	0.00797876	FALSE	196.759	285.406	197.512	223.782	158.096	132.327	163.389	143.4
ENSDARG00000070885	30.9478	-1.38387	0.398905	-3.46917	0.000522064	0.00802589	FALSE	50.5169	51.1306	42.432	39.5707	30.3107	9.39448	11.6661	20.5015
ENSDARG00000059365	243.455	-0.523543	0.151017	-3.46678	0.000526732	0.00809269	FALSE	266.559	310.159	315.093	284.991	186.241	216.2	238.635	178.665
ENSDARG00000099244	71.1075	0.933346	0.269311	3.46568	0.000528902	0.00812106	FALSE	75.7833	34.3356	49.1262	44.2122	104.125	118.187	65.9784	94.8626
ENSDARG00000095682	4.96796	3.6012	1.03923	3.46528	0.000529687	0.00812813	FALSE	0	2.14437	1.00974	0	11.3273	7.08279	9.62281	11.0779
ENSDARG00000017490	485.54	-1.17529	0.339253	-3.46436	0.000531495	0.00815089	FALSE	684.916	1054.36	924.051	635.025	333.628	412.232	415.478	299.237
ENSDARG00000102362	3266.9	-0.27532	0.0794774	-3.46413	0.000531948	0.00815285	FALSE	3834.91	4055.05	3860.09	3797.99	3052.55	3498.7	3042.06	3253.84
ENSDARG00000076406	125.893	-0.701355	0.202495	-3.46356	0.000533084	0.00816527	FALSE	179.917	178.412	190.048	165.52	100.799	94.7623	125.624	118.198
ENSDARG00000003615	353.081	-1.30003	0.375594	-3.46127	0.000537643	0.00823007	FALSE	528.962	596.61	598.226	535.903	237.222	199.005	192.672	288.989
ENSDARG00000076027	1559.98	0.326338	0.0942967	3.46076	0.000538661	0.0082356	FALSE	1592.74	1361.44	1309.18	1320.55	1711.29	1707.78	1850.45	1721.5
ENSDARG00000012453	464.013	-0.355929	0.102846	-3.46079	0.000538593	0.0082356	FALSE	522.411	599.783	612.276	566.234	384.02	480.34	491.695	445.401
ENSDARG00000061757	2231.67	0.275134	0.0795126	3.46026	0.000539659	0.00824583	FALSE	2178.86	1774.77	1838.54	2022.76	2395.16	2519.67	2339.79	2191.87
ENSDARG00000099771	711.553	-0.270714	0.0782566	-3.45932	0.000541548	0.00826462	FALSE	817.233	835.519	759.204	797.227	655.877	689.392	696.657	615.879
ENSDARG00000100151	946.973	0.30336	0.0876917	3.4594	0.000541389	0.00826462	FALSE	809.45	856.149	873.904	846.013	1033.72	1028.06	950.951	1169.27
ENSDARG00000007523	3087.54	0.171929	0.0497174	3.45812	0.00054395	0.00829623	FALSE	2852.81	2785.59	2789.14	2927.98	3306.68	3139.55	3113.84	3232.95
ENSDARG00000039130	138.491	0.522184	0.15111	3.45566	0.000548941	0.00836727	FALSE	121.599	108.001	119.725	91.2022	143.017	167.163	144.878	174.474
ENSDARG00000029018	994.595	0.31403	0.0909038	3.45453	0.000551243	0.00839466	FALSE	785.869	917.362	759.784	754.839	996.246	1009.83	948.744	1044.13
ENSDARG00000043460	163.455	0.559845	0.162065	3.45445	0.000551408	0.00839466	FALSE	132.719	110.037	124.667	159.082	157.364	218.743	199.044	203.277
ENSDARG00000094584	54.2488	2.18581	0.633005	3.45307	0.000554244	0.00843272	FALSE	8.41749	3.07118	5.70386	7.81157	35.5818	44.1694	19.1732	14.8015
ENSDARG00000013443	4453.32	0.185082	0.0536061	3.45262	0.000555164	0.00844159	FALSE	4137.67	4089.83	4040.65	4071.27	4486.94	4529.12	4694.18	4865.45
ENSDARG00000042112	527.031	-0.696518	0.201748	-3.45242	0.000555586	0.00844289	FALSE	538.268	658.912	772.398	892.534	461.835	474.327	363.88	468.236
ENSDARG00000078636	15.0353	-1.95308	0.565752	-3.45219	0.000556059	0.00844496	FALSE	17.5099	34.3186	31.5101	38.8407	9.62109	10.0983	3.14626	8.82788
ENSDARG00000012788	324.091	-0.541049	0.156822	-3.45007	0.000560432	0.00850227	FALSE	326.372	368.07	380.071	326.559	237.271	258.613	253.37	213.976
ENSDARG00000005894	132.543	-0.902104	0.261477	-3.45004	0.000560511	0.00850227	FALSE	169.435	214.402	188.423	227.831	134.461	128.215	64.0494	101.554
ENSDARG00000035221	310.08	0.422684	0.122583	3.44813	0.000564478	0.00855726	FALSE	250.645	253.967	278.04	252.752	313.699	331.141	363.79	381.775
ENSDARG00000058162	207.133	0.423494	0.122921	3.44526	0.000570506	0.00864342	FALSE	177.044	173.133	177.966	175.458	236.831	238.842	252.036	215.479
ENSDARG00000091524	60.3337	-0.715605	0.207767	-3.44427	0.000572597	0.00866986	FALSE	85.9972	81.9652	88.2577	78.3117	48.517	39.9314	62.2292	53.019
ENSDARG00000074531	502.815	-0.528752	0.153554	-3.44342	0.000574401	0.00869194	FALSE	574.012	818.941	596.9	597.544	532.809	456.132	445.219	358.884
ENSDARG00000096269	33.2862	-1.13608	0.329975	-3.44294	0.000575432	0.00870228	FALSE	47.8308	35.0599	43.0808	60.7648	18.7565	15.0697	30.5073	20.7455
ENSDARG00000094719	723.704	-0.546874	0.158872	-3.44223	0.000576931	0.00871969	FALSE	670.86	657.507	729.133	702.79	406.962	472.582	474.987	536.181
ENSDARG00000007383	600.062	0.360568	0.104762	3.44179	0.000577875	0.00872869	FALSE	461.287	556.147	468.37	576.69	633.132	702.32	593.817	725.457
ENSDARG00000032102	2305.9	-0.257485	0.0748188	-3.44144	0.000578625	0.00873477	FALSE	2369.26	2684.27	2432.92	2585.48	2002.47	2253.67	2081.33	2092.12
ENSDARG00000097592	22.7723	1.42592	0.414369	3.44119	0.00057916	0.00873758	FALSE	11.6739	7.50702	13.787	15.3564	23.0884	23.2258	43.0017	41.9332
ENSDARG00000038293	46.4675	-1.57637	0.458123	-3.44093	0.000579721	0.00874079	FALSE	44.8674	81.513	96.9544	90.579	29.747	27.2762	24.2021	24.3154
ENSDARG00000077547	279.245	-0.477068	0.138653	-3.44074	0.000580122	0.00874157	FALSE	299.681	400.797	302.321	375.473	208.121	274.544	231.218	279.346
ENSDARG00000076238	289.163	-0.516587	0.150327	-3.43642	0.000589455	0.00887687	FALSE	401.465	318.175	420.166	310.449	304.452	229.141	216.377	260.297
ENSDARG00000059049	155.95	-0.71045	0.206767	-3.436	0.000590373	0.00888536	FALSE	157.659	142.611	180.342	180.725	115.366	76.7385	114.373	98.224
ENSDARG00000096041	11.2007	-2.17599	0.633513	-3.4348	0.00059299	0.0089194	FALSE	29.201	19.2945	25.6338	24.401	3.84255	6.05666	3.14857	8.82851
ENSDARG00000002988	5102.9	-0.340586	0.0991634	-3.43459	0.000593448	0.00892093	FALSE	5662.39	5396.75	6002.52	6079.72	4262.31	4844.85	4124.71	5045.96
ENSDARG00000104436	4309.42	-0.932884	0.271679	-3.43378	0.000595237	0.00894246	FALSE	6927.75	6107.28	6242.42	6119.7	3386.59	1950.49	3810.34	4155.95
ENSDARG00000089369	414.097	-0.594776	0.173268	-3.4327	0.000597602	0.00897262	FALSE	549.149	567.076	496.062	539.93	405.624	291.585	384.674	344.524
ENSDARG00000093024	70.838	0.998816	0.291188	3.43014	0.000603271	0.00905231	FALSE	36.3326	41.5125	46.0595	29.4249	75.4541	58.3206	69.2594	103.737
ENSDARG00000029761	1710.4	0.356543	0.10398	3.42897	0.000605882	0.00908606	FALSE	1590.79	1496.74	1482.86	1515.25	1998.85	1933.87	1895.67	1960.94
ENSDARG00000100555	810.231	-0.405087	0.118149	-3.42862	0.000606669	0.00909242	FALSE	812.72	939.093	845.031	908.117	608.023	674.881	655.138	711.331
ENSDARG00000099247	52.9457	1.03558	0.30208	3.42816	0.000607678	0.0091021	FALSE	33.5398	18.2363	39.3437	36.111	52.0088	82.8193	68.1204	58.4731
ENSDARG00000093448	2645.37	-0.217995	0.0636173	-3.42667	0.000611032	0.00914389	FALSE	3007.85	2806.39	2856.67	2879.28	2339.62	2522.6	2494.67	2571.51
ENSDARG00000099867	202.731	0.519622	0.151644	3.4266	0.000611197	0.00914389	FALSE	171.207	161.485	167.417	130.364	232.928	244.419	230.656	191.669
ENSDARG00000099821	211.071	-1.01638	0.296675	-3.42591	0.00061274	0.00916151	FALSE	319.413	364.058	376.202	318.15	162.79	187.197	133.307	198.021
ENSDARG00000045842	1038.28	0.387543	0.11313	3.42565	0.00061332	0.00916471	FALSE	634.912	760.381	706.502	774.918	1131.1	870.895	853.432	917.637
ENSDARG00000021309	1573.62	-0.296006	0.0864529	-3.4239	0.000617293	0.00921858	FALSE	1720.79	1741.61	1856.25	1635.54	1455.39	1411.25	1381.02	1416.22
ENSDARG00000021573	70.4373	-1.54219	0.450501	-3.42328	0.00061871	0.00923425	FALSE	109.445	146.922	151.663	162.6	58.6811	47.4612	54.54	35.3124
ENSDARG00000095362	158.346	-1.17737	0.344002	-3.42258	0.0006203	0.00925247	FALSE	212.832	199.081	347.612	332.418	127.615	116.709	98.447	140.829
ENSDARG00000057782	4654.98	0.234017	0.0683784	3.42239	0.000620734	0.00925343	FALSE	4146.77	3921.52	4044.19	4012.73	5024.87	4519.07	4354.82	5065.61
ENSDARG00000104687	974.902	0.664169	0.194116	3.4215	0.000622758	0.00927809	FALSE	467.621	327.316	431.986	391.449	637.736	654.644	698.198	571.305
ENSDARG00000068262	544.158	-0.438344	0.128144	-3.42072	0.000624559	0.00929941	FALSE	654.963	634.035	629.784	589.821	449.476	492.601	438.796	469.257
ENSDARG00000070490	19.8863	-1.75307	0.51256	-3.42021	0.000625719	0.00931114	FALSE	61.4421	46.6939	12.8839	38.8709	5.98223	16.286	18.9953	6.94468
ENSDARG00000093888	4.99746	-3.58823	1.04949	-3.41903	0.000628451	0.00934625	FALSE	14.818	17.179	5.06367	12.9036	0.938447	0	0	3.3167
ENSDARG00000057571	5187.4	-0.398611	0.116616	-3.41815	0.000630478	0.00937084	FALSE	6745.86	7040.9	6209.49	6345.74	4693.98	5160.98	4793.44	5333.8
ENSDARG00000086553	1371.03	0.480221	0.140505	3.41782	0.000631251	0.00937677	FALSE	847.21	965.065	885.378	944.63	1171.78	1146.85	1323.04	1442.26
ENSDARG00000069808	502.556	-0.349913	0.102392	-3.4174	0.000632233	0.0093858	FALSE	536.848	581.961	552.438	501.811	422.555	414.339	468.254	399.086
ENSDARG00000077549	874.446	-0.357547	0.10464	-3.41692	0.000633349	0.0093968	FALSE	1096.63	991.186	1061.51	979.135	784.238	819.548	841.006	775.155
ENSDARG00000010244	5595.09	-0.292397	0.0856059	-3.41562	0.000636368	0.00943602	FALSE	6034.71	6157.38	6166.82	6552.66	4781.65	5004.57	5368.91	5189.94
ENSDARG00000032049	3399	0.324523	0.0950217	3.41525	0.000637234	0.00944326	FALSE	3014.91	3145.99	2689.46	2918.4	3692.95	3544.88	3648.41	3848.56
ENSDARG00000044318	93.9462	0.886843	0.259783	3.41378	0.000640675	0.00948865	FALSE	63.6729	84.2541	52.1101	48.7278	124.316	95.6437	136.513	101.548
ENSDARG00000104745	36.1515	1.12708	0.330223	3.4131	0.000642288	0.00950692	FALSE	12.3246	35.6949	19.9212	19.0789	61.2356	48.8762	30.7935	44.5271
ENSDARG00000078749	38.7015	-1.03847	0.304301	-3.41264	0.000643357	0.00951713	FALSE	58.2739	57.9497	57.9314	60.4341	29.906	27.2764	25.1242	31.9849
ENSDARG00000098995	140.088	-1.2425	0.364106	-3.41247	0.000643765	0.00951755	FALSE	83.6683	64.8625	71.1309	72.8904	25.1329	35.3621	22.6297	40.3989
ENSDARG00000088593	587.176	0.306605	0.0898599	3.41203	0.000644801	0.0095265	FALSE	550.639	488.585	473.086	514.18	660.288	618.468	623.457	597.935
ENSDARG00000070713	8.49504	-3.17787	0.93141	-3.41189	0.00064513	0.0095265	FALSE	7.31337	16.0838	15.8164	25.3473	2.8789	1.00992	0	3.31426
ENSDARG00000006491	216.26	-0.664462	0.194862	-3.40992	0.000649829	0.00959024	FALSE	236.159	296.112	289.987	293.315	140.696	162.622	212.664	189.742
ENSDARG00000093569	465.294	-0.465752	0.136683	-3.40755	0.000655499	0.00966352	FALSE	489.337	579.006	509.036	549.932	353.733	331.533	434.495	424.321
ENSDARG00000097734	2.26317	-5.11491	1.50107	-3.40752	0.000655565	0.00966352	FALSE	4.36757	10.5261	4.96976	6.32018	0	0	0	0
ENSDARG00000075827	192.053	-0.85639	0.251418	-3.40624	0.000658642	0.00970316	FALSE	318.675	286.199	293.734	323.51	153.961	165.142	138.867	217.81
ENSDARG00000037917	256.846	-0.536638	0.15759	-3.40529	0.000660944	0.00973136	FALSE	323.338	364.316	302.284	284.553	217.417	182.213	258.724	219.66
ENSDARG00000007975	762.004	-0.308765	0.0907471	-3.40248	0.00066777	0.0098261	FALSE	865.267	820.942	906.675	799.677	690.749	702.541	718.732	624.904
ENSDARG00000031240	1244.05	0.425346	0.12506	3.40114	0.000671044	0.00986848	FALSE	807.219	828.387	1004.52	1054.36	1247.49	1237.76	1202.3	1279.82
ENSDARG00000071347	491.581	0.432037	0.127044	3.40068	0.000672182	0.00987942	FALSE	421.962	317.662	322.726	384.275	472.918	476.396	488.536	506.298
ENSDARG00000028889	3903.3	-0.236351	0.0695185	-3.39983	0.000674288	0.00989877	FALSE	4237.01	4075.45	4383.16	4124.96	3316.97	3565.56	3744.17	3653.62
ENSDARG00000089142	205.353	0.420762	0.123758	3.39988	0.000674158	0.00989877	FALSE	160.365	172.727	174.012	163.363	213.912	223.223	235.729	226.15
ENSDARG00000058504	2036.15	0.272882	0.0803579	3.39583	0.000684214	0.0100386	FALSE	1758.58	1824.75	1968.73	1876.36	2163.77	2182.29	2375.85	2258.97
ENSDARG00000013687	249.201	-0.745678	0.219643	-3.39495	0.00068641	0.0100649	FALSE	324.485	350.504	304.407	309.386	206.976	226.256	138.91	195.772
ENSDARG00000045019	2009.38	-0.343893	0.101314	-3.39433	0.000687979	0.010082	FALSE	2155.39	2066.85	2176.13	2003.02	1706.4	1765.11	1545.91	1600.22
ENSDARG00000098897	3976.57	0.234201	0.0690071	3.39386	0.000689145	0.0100932	FALSE	3788.47	3879.99	3467.95	3837.48	4331.89	4818.94	4276.13	4183.26
ENSDARG00000019274	524.68	0.379338	0.111781	3.39358	0.000689846	0.0100976	FALSE	415.887	440.136	458.867	397.797	519.252	641.661	489.687	577.777
ENSDARG00000069333	82.0711	-0.82636	0.243532	-3.39322	0.000690752	0.010105	FALSE	122.614	121.169	83.7543	86.7424	49.0367	69.6718	62.952	50.7663
ENSDARG00000052304	8054.81	-0.238171	0.0702042	-3.39254	0.00069247	0.0101242	FALSE	9046.64	9475.39	9283.58	9026.14	7660.34	8239.01	7598.98	7728.91
ENSDARG00000058824	933.611	-0.310233	0.0914855	-3.39106	0.000696219	0.0101731	FALSE	1110.69	1058.49	996.157	1007.58	771.152	848.042	864.017	879.925
ENSDARG00000014246	96.4487	-0.617318	0.18216	-3.38887	0.000701805	0.0102487	FALSE	139.701	136.35	121.51	136.968	75.3909	87.9155	108.732	76.0747
ENSDARG00000076763	795.219	0.2405	0.0709971	3.38746	0.000705425	0.0102896	FALSE	732.673	715.834	735.215	704.36	816.376	873.893	834.174	886.706
ENSDARG00000019355	579.886	-0.316694	0.0934881	-3.38753	0.000705245	0.0102896	FALSE	606.513	651.411	707.293	667.693	504.384	528.271	581.1	504.208
ENSDARG00000040608	315.805	-0.426026	0.125809	-3.38628	0.000708461	0.0103279	FALSE	350.936	401.431	389.483	364.258	246.197	305.128	284.588	286.718
ENSDARG00000058678	46.7149	-0.880668	0.260093	-3.38597	0.000709271	0.0103337	FALSE	52.6028	72.1095	49.3861	61.4933	36.4041	27.2315	34.6681	29.7929
ENSDARG00000098986	216.413	-0.653472	0.193015	-3.3856	0.000710217	0.0103395	FALSE	335.149	238.216	290.754	306.741	172.618	176.782	193.715	200.747
ENSDARG00000043557	10.5973	1.91044	0.564302	3.3855	0.000710495	0.0103395	FALSE	4.39605	2.14121	4.96123	5.44001	13.3729	12.1047	17.916	20.9943
ENSDARG00000097963	31.0681	1.44921	0.428117	3.38509	0.000711561	0.010349	FALSE	12.742	18.1513	19.3586	17.0887	36.1359	72.6842	47.188	30.897
ENSDARG00000030980	260.058	-0.50342	0.148774	-3.38379	0.000714922	0.0103919	FALSE	269.331	301.573	360.108	330.029	251.741	230.751	184.216	225.896
ENSDARG00000069780	195.379	0.720119	0.212858	3.38309	0.000716739	0.0104122	FALSE	154.397	139.668	103.919	95.3268	208.827	147.77	236.254	214.387
ENSDARG00000097091	6.9802	-3.16511	0.93682	-3.37856	0.000728661	0.0105793	FALSE	13.1369	14.8681	22.7878	24.3768	0	2.00215	0	6.59064
ENSDARG00000057671	1774.2	0.308013	0.091182	3.378	0.000730162	0.010595	FALSE	1495.47	1577.98	1582.79	1766.83	1969.37	1994.41	1881.17	2113.77
ENSDARG00000004256	89.9639	1.01622	0.301032	3.37581	0.000735997	0.0106734	FALSE	59.8112	41.8298	28.5438	37.0263	84.6999	90.8903	102.75	55.1701
ENSDARG00000020450	699.642	0.303371	0.0898748	3.37548	0.000736859	0.0106761	FALSE	643.76	563.756	649.09	640.748	768.042	780.485	770.049	763.021
ENSDARG00000040332	126.337	0.639909	0.189579	3.37542	0.000737032	0.0106761	FALSE	75.8131	97.5138	113.84	96.3613	150.463	156.576	137.479	155.023
ENSDARG00000009612	20.9247	-1.85815	0.55059	-3.37484	0.000738573	0.0106923	FALSE	46.8125	27.9091	51.3831	32.06	7.69217	8.08741	16.826	11.0542
ENSDARG00000076861	179.234	-0.538466	0.1596	-3.37385	0.00074126	0.010725	FALSE	213.614	237.823	241.44	210.062	148.442	158.433	137.816	177.813
ENSDARG00000079105	2.65232	4.90819	1.4552	3.37286	0.000743925	0.0107573	FALSE	0	0	0	0	1.88891	8.1227	10.5875	3.33399
ENSDARG00000022891	2584.68	0.192332	0.0570469	3.37147	0.000747677	0.0108053	FALSE	2242.53	2253.53	2219.58	2260.01	2544.86	2463.65	2622.15	2626.24
ENSDARG00000105185	627.751	-0.351765	0.104364	-3.37057	0.000750129	0.0108345	FALSE	681.1	714.078	757.629	729.205	544.199	611.413	546.646	558.132
ENSDARG00000028507	2778.53	-0.439037	0.13027	-3.37021	0.000751119	0.0108426	FALSE	3830.88	2982.43	3059.28	4233.32	2796.41	2693.95	2353.76	2559.49
ENSDARG00000094546	3.17382	-4.31292	1.27982	-3.36994	0.000751835	0.0108467	FALSE	7.29384	5.35927	6.89214	5.41805	0	0	0	1.10303
ENSDARG00000079126	32.9393	1.39528	0.414128	3.3692	0.000753866	0.0108697	FALSE	8.4642	19.2227	10.9934	22.0712	50.3936	41.6346	23.1131	47.4813
ENSDARG00000052012	329.732	0.45668	0.13561	3.3676	0.000758253	0.0109267	FALSE	243.09	279.834	292.299	357.736	438.739	401.748	342.402	435.657
ENSDARG00000069157	822.852	-0.237986	0.0706835	-3.36692	0.000760135	0.0109475	FALSE	959.198	863.664	918.102	918.742	791.193	735.338	798.262	775.511
ENSDARG00000028740	294.387	0.380523	0.113079	3.3651	0.000765166	0.0110035	FALSE	300.587	261.679	236.327	268.272	307.873	352.431	354.48	369.668
ENSDARG00000044094	212.593	-0.648721	0.192779	-3.3651	0.000765154	0.0110035	FALSE	316.527	311.056	263.732	296.182	194.461	198.954	161.444	201.915
ENSDARG00000068819	66.4725	0.705075	0.20953	3.36504	0.000765338	0.0110035	FALSE	45.3561	42.8511	52.4432	46.1772	73.7429	89.8127	62.0692	79.5189
ENSDARG00000011376	196.738	-0.670644	0.199335	-3.36441	0.000767073	0.0110221	FALSE	214.935	365.676	221.326	342.621	200.481	190.199	178.283	150.768
ENSDARG00000019444	3087.85	-0.279201	0.0830164	-3.3632	0.000770431	0.0110577	FALSE	3598.09	3605.03	3517.58	3322.67	2690.19	2818.12	3363.46	2699.25
ENSDARG00000104980	321.919	0.499466	0.148504	3.36332	0.000770107	0.0110577	FALSE	237.425	244.694	284.658	265.147	321.344	381.887	341.202	417.986
ENSDARG00000006615	518.721	-0.389335	0.115818	-3.36161	0.000774887	0.0111153	FALSE	535.483	595.879	597.676	505.49	450.467	439.585	382.621	433.285
ENSDARG00000045490	2031.37	-0.277783	0.0826704	-3.36013	0.000779053	0.0111623	FALSE	2391.16	2248.86	2297.76	2322.57	1912.22	1809.1	2060.85	1855.06
ENSDARG00000088561	22.913	-1.83719	0.54675	-3.3602	0.000778872	0.0111623	FALSE	22.4691	36.4871	32.614	36.1746	7.48406	14.2471	4.7858	10.5238
ENSDARG00000009170	1592.38	-0.208478	0.0620913	-3.3576	0.000786213	0.0112584	FALSE	1804.63	1755.31	1768.06	1725.76	1454.44	1532.93	1610.23	1505
ENSDARG00000001968	128.587	-0.640996	0.190924	-3.35734	0.000786955	0.0112626	FALSE	183.226	210.491	164.414	146.787	118.064	126.338	94.0169	112.432
ENSDARG00000098256	61.0227	1.45472	0.433513	3.35567	0.000791742	0.0113247	FALSE	8.75786	7.50617	20.6909	16.2637	32.6931	52.5068	35.6713	27.59
ENSDARG00000045814	1439.71	-0.272836	0.0813155	-3.35527	0.000792863	0.0113342	FALSE	1708.39	1739.03	1578.45	1640.44	1314.62	1401.4	1414.85	1385.18
ENSDARG00000069375	325.107	-0.837708	0.24972	-3.35459	0.000794819	0.0113557	FALSE	447.301	552.88	468.559	411.517	231.703	229.453	215.736	376.255
ENSDARG00000099313	596.419	-0.368383	0.109867	-3.35298	0.000799472	0.0114157	FALSE	630.96	601.413	716.119	721.423	471.626	500.754	501.858	598.271
ENSDARG00000104681	36.2927	1.82881	0.545497	3.35256	0.000800686	0.0114265	FALSE	5.27778	9.20769	28.5251	8.57586	41.6527	54.5846	33.0526	22.6339
ENSDARG00000009447	13653.6	-0.226373	0.0675311	-3.35214	0.000801909	0.0114375	FALSE	15688.2	14115	14542.7	13882.3	12133	13244.9	11900.4	12486.3
ENSDARG00000088023	118.207	-0.636326	0.189892	-3.35098	0.000805256	0.0114787	FALSE	148.14	152.88	132.459	162.438	91.4093	91.0874	114.831	86.4519
ENSDARG00000032426	138.253	-0.581185	0.173465	-3.35045	0.000806796	0.0114941	FALSE	175.894	190.112	154.948	171.121	132.955	109.553	108.037	111.113
ENSDARG00000028699	1680.94	0.237985	0.0710442	3.34982	0.00080864	0.0115138	FALSE	1579.37	1477.66	1470.13	1408.14	1693.76	1747.67	1854.16	1696.35
ENSDARG00000099689	3.60627	-5.56203	1.66114	-3.34833	0.000813002	0.0115694	FALSE	10.2761	5.315	12.0434	8.21093	0	0	0	0
ENSDARG00000013830	672.016	-0.324066	0.0968019	-3.34772	0.000814784	0.0115816	FALSE	654.724	754.544	857.924	841.156	611.198	615.128	663.627	599.333
ENSDARG00000099384	44.5406	-1.21361	0.362517	-3.34774	0.000814742	0.0115816	FALSE	89.6505	47.0492	41.8981	86.359	19.9591	36.2861	15.8622	42.0273
ENSDARG00000019998	614.17	-0.341432	0.101998	-3.34743	0.000815657	0.0115874	FALSE	626.175	684.139	695.584	702.941	517.338	535.168	565.483	523.104
ENSDARG00000058088	2601.87	-0.351104	0.10491	-3.34673	0.000817717	0.0116101	FALSE	3158.34	3419.36	3019.36	3161.41	2408.05	2467.38	2663.11	2464.07
ENSDARG00000003835	3681.64	0.253806	0.0758437	3.34643	0.000818597	0.011616	FALSE	3152.79	3297.33	3463.37	3146.18	4058.88	3806.03	3615.14	4094.87
ENSDARG00000005162	19018.7	-0.279165	0.0834565	-3.34503	0.000822727	0.011668	FALSE	21772.2	21285.6	21209.1	20362.3	17090	18845.1	16463.1	17339.8
ENSDARG00000077559	99.0952	-0.772331	0.230916	-3.34464	0.000823902	0.0116781	FALSE	149.945	104.126	127.476	126.198	72.4444	67.6986	57.5275	99.2399
ENSDARG00000045180	2377.52	-0.441263	0.131961	-3.3439	0.000826106	0.0117027	FALSE	2344.75	2919.35	2947.97	2764.92	1958.87	2195.32	1782.03	2150.76
ENSDARG00000038894	627.669	0.443919	0.132776	3.34335	0.000827725	0.0117124	FALSE	590.121	527.907	559.736	539.709	848	676.742	773.964	714.912
ENSDARG00000077643	260.738	-1.0078	0.301427	-3.34344	0.000827471	0.0117124	FALSE	396.863	319.56	424.114	450.508	275.66	131.969	192.367	191.751
ENSDARG00000068242	312.404	0.500554	0.149819	3.34106	0.000834604	0.0118031	FALSE	303.71	290.556	279.007	304.585	523.746	341.264	390.44	409.481
ENSDARG00000044074	884.789	-0.657436	0.196811	-3.34045	0.000836436	0.0118157	FALSE	966.079	882.997	792.818	940.538	589.309	645.322	539.769	495.927
ENSDARG00000020711	266.202	-3.13648	0.938898	-3.3406	0.000835967	0.0118157	FALSE	599.396	418.598	1050.33	441.273	30.5253	26.266	26.6886	203.913
ENSDARG00000053201	92.6205	0.675169	0.202196	3.33917	0.000840279	0.0118633	FALSE	87.4347	66.5275	69.7482	69.471	134.032	123.241	106.812	100.375
ENSDARG00000053456	705.179	-0.355238	0.106413	-3.33829	0.000842965	0.0118945	FALSE	729.149	773.783	918.191	929.589	586.197	662.542	741.273	635.088
ENSDARG00000040469	310.723	-0.464912	0.139281	-3.33794	0.000844017	0.0119026	FALSE	315.621	414.308	341.546	396.831	267.652	262.193	288.255	247.333
ENSDARG00000056028	414.615	0.491493	0.147252	3.33777	0.000844551	0.0119035	FALSE	348.761	350.684	349.605	224.024	452.142	492.79	385.97	453.541
ENSDARG00000044365	649.77	-0.510027	0.152825	-3.33732	0.000845913	0.011916	FALSE	795.011	762.831	790.81	936.714	567.891	496.573	598.466	645.678
ENSDARG00000068114	57.186	-0.971568	0.29116	-3.33689	0.000847226	0.0119278	FALSE	105.507	93.1239	81.13	104.644	59.5991	58.8135	33.2553	43.6394
ENSDARG00000003841	180.9	0.506297	0.151929	3.33246	0.000860825	0.0121124	FALSE	124.063	110.45	140.881	135.524	201.947	179.737	173.1	172.159
ENSDARG00000008030	3260.6	-0.52717	0.158252	-3.3312	0.000864726	0.0121605	FALSE	3533.56	3008.85	3796.35	3304.62	2041.6	2429.5	2584.2	2412.25
ENSDARG00000037588	700.266	0.449008	0.134811	3.33065	0.000866436	0.0121777	FALSE	663.73	473.655	552.349	616.176	807.453	732.777	748.366	855.722
ENSDARG00000079742	213.679	0.672578	0.202002	3.32956	0.000869839	0.0122187	FALSE	108.942	198.545	151.437	197.111	277.708	202.299	273.817	297.264
ENSDARG00000102370	198.893	0.843804	0.253509	3.32849	0.000873167	0.0122586	FALSE	131.254	149.103	107.228	142.649	339.934	271.682	160.361	178.734
ENSDARG00000026017	143.857	-0.941307	0.282864	-3.32778	0.000875415	0.0122832	FALSE	168.88	185.526	210.965	267.713	104.116	94.8971	101.475	134.465
ENSDARG00000001882	860.998	0.286471	0.0861127	3.3267	0.000878795	0.0123238	FALSE	740.546	725.259	687.118	756.301	952.109	923.21	797.226	873.694
ENSDARG00000098724	1538.03	0.346732	0.104243	3.32618	0.00088046	0.0123402	FALSE	1514.53	1403.19	1391.44	1496.58	1729.25	2002.03	1743.91	1906.44
ENSDARG00000100878	45.5807	0.89006	0.267625	3.32577	0.000881746	0.0123513	FALSE	33.8114	22.4529	24.9514	29.0969	51.3001	49.3862	40.1969	61.9384
ENSDARG00000094045	395.876	-0.701419	0.210949	-3.32507	0.000883955	0.0123754	FALSE	582.694	610.234	460.146	787.827	400.308	360.09	356.122	385.126
ENSDARG00000093079	59.1356	-1.22831	0.369445	-3.32474	0.000885001	0.0123831	FALSE	85.4379	91.3897	113.699	111.698	35.0436	18.6566	79.7321	41.6037
ENSDARG00000056233	361.623	-0.520819	0.156711	-3.32345	0.000889129	0.0124339	FALSE	420.929	439.931	362.051	418.964	283.544	288.459	269.768	302.236
ENSDARG00000020794	1090.79	0.361833	0.10902	3.31896	0.000903521	0.0126141	FALSE	1113.77	831.651	849.429	858.496	1184.77	1132.54	1189.51	1176.95
ENSDARG00000098369	119.635	-0.98848	0.297801	-3.31927	0.000902542	0.0126141	FALSE	190.745	124.511	217.769	186.626	94.6281	107.1	38.7093	122.404
ENSDARG00000020853	11.774	-2.05906	0.620392	-3.31897	0.000903493	0.0126141	FALSE	29.3413	22.4719	26.8475	11.7989	6.67317	2.01684	8.44246	4.42147
ENSDARG00000075622	238.131	-0.697107	0.210103	-3.31793	0.000906856	0.0126536	FALSE	299.135	389.591	423.219	385.567	253.791	199.693	214.107	257.511
ENSDARG00000023578	876.193	-0.353753	0.106671	-3.31629	0.000912206	0.0127212	FALSE	854.887	1139.54	932.333	986.812	767.673	765.142	784.342	748.398
ENSDARG00000070392	12.2442	1.87474	0.565392	3.31582	0.000913751	0.0127356	FALSE	1.47806	4.2811	10.1048	4.59285	14.8804	12.1209	23.4923	27.52
ENSDARG00000098600	95.0938	-0.615346	0.185634	-3.31484	0.000916961	0.0127733	FALSE	118.383	119.868	120.264	155.152	87.29	92.91	87.5648	68.2693
ENSDARG00000087596	732.452	-0.471008	0.142108	-3.31444	0.000918255	0.0127842	FALSE	825.644	909.619	900.912	875.453	558.406	688.08	595.141	693.578
ENSDARG00000055647	616.466	-0.508937	0.153584	-3.31374	0.000920564	0.0128092	FALSE	711.715	753.015	768.355	716.881	523.83	559.517	501.018	488.766
ENSDARG00000054515	107.648	1.14732	0.346251	3.31354	0.000921237	0.0128115	FALSE	84.5405	60.0835	83.5375	32.4869	150.363	138.385	129.885	155.538
ENSDARG00000099563	1417.09	0.275874	0.0832687	3.31305	0.000922833	0.0128266	FALSE	1342.86	1412.81	1326.33	1242.66	1641.21	1788.7	1510.13	1501.76
ENSDARG00000058733	73.7623	-0.975352	0.294428	-3.3127	0.000923997	0.0128356	FALSE	97.9373	120.028	83.9669	77.8038	38.3682	72.6748	46.2397	35.3314
ENSDARG00000102275	5.30937	4.46562	1.3489	3.31058	0.000931043	0.0129263	FALSE	0	1.07669	0	0	7.64122	4.06052	11.7386	5.57155
ENSDARG00000069208	160.75	-0.652445	0.197108	-3.3101	0.000932635	0.0129413	FALSE	180.779	257.479	224.16	204.885	132.967	134.337	123.63	162.168
ENSDARG00000035533	45.6522	-1.30878	0.395425	-3.3098	0.000933627	0.0129479	FALSE	80.0427	54.7534	56.8425	61.2791	26.0938	24.2521	28.2307	23.1537
ENSDARG00000079752	1696.16	-0.510788	0.154353	-3.30922	0.000935552	0.0129674	FALSE	2256.51	2370.5	2220.24	1862.74	1586.72	1502.02	1541.99	1480.95
ENSDARG00000042690	2182.08	0.18672	0.056432	3.30876	0.000937115	0.0129819	FALSE	2044.2	1990.01	2117.18	2087.87	2272.52	2418	2370.23	2320.07
ENSDARG00000012381	6244.86	-0.349339	0.105604	-3.30802	0.000939578	0.0130088	FALSE	6660.35	6710.87	8014.99	7879.59	5009.41	6099.9	5817.15	6050.72
ENSDARG00000099595	5.17566	-3.60107	1.08891	-3.30704	0.000942858	0.013047	FALSE	19.11	11.6878	12.0398	8.20283	0	0	4.23971	0
ENSDARG00000042285	138.13	-0.635789	0.192277	-3.30663	0.000944252	0.0130591	FALSE	190.108	170.138	160.449	156.973	114.473	132.311	81.832	106.387
ENSDARG00000041703	1798.8	-0.380748	0.115176	-3.3058	0.000947062	0.0130908	FALSE	1825.44	1855.03	1644.97	1723.93	1158.56	1421.77	1458.37	1374.91
ENSDARG00000039131	817.121	-0.694556	0.210122	-3.30548	0.000948126	0.0130982	FALSE	949.398	1033.64	1103.65	1036.85	530.07	749.69	640.305	628.569
ENSDARG00000055455	36389.5	0.198043	0.0599277	3.30469	0.0009508	0.0131207	FALSE	32913.4	32596.2	32578.2	35356.4	39052.2	37535.3	38088	38408.1
ENSDARG00000069026	154.334	0.824259	0.249411	3.30481	0.000950394	0.0131207	FALSE	128.408	104.821	90.9841	106.094	254.596	149.378	167.904	186.07
ENSDARG00000044328	303.864	-0.413927	0.125274	-3.30418	0.000952556	0.0131377	FALSE	377.477	363.221	381.928	357.349	313.93	270.126	286.222	238.67
ENSDARG00000029381	277.21	-0.655169	0.198483	-3.30088	0.000963831	0.0132859	FALSE	374.46	414.428	389.672	363.451	254.887	209.487	241.946	273.088
ENSDARG00000095157	289.102	-0.424835	0.128795	-3.29853	0.000971935	0.0133903	FALSE	342.584	343.382	350.68	360.393	247.065	299.856	233.56	260.75
ENSDARG00000021433	448.177	-0.484249	0.146824	-3.29815	0.000973226	0.0134007	FALSE	504.123	578.53	537.692	617.849	451.914	414.594	344.514	390.142
ENSDARG00000090996	42.9823	-1.12658	0.341659	-3.29737	0.00097595	0.0134308	FALSE	46.9042	44.9602	65.5212	42.6239	21.9594	21.1818	21.0844	27.6265
ENSDARG00000056483	3236.54	0.273049	0.0828638	3.29516	0.000983671	0.0135222	FALSE	3011.56	2836.49	2658.71	2782.32	3244.92	3381.71	3578.95	3430.35
ENSDARG00000091937	696.13	0.405681	0.123111	3.29524	0.000983386	0.0135222	FALSE	617.913	615.468	590.639	528.95	679.49	797.58	872.557	765.195
ENSDARG00000100088	727.695	-0.724604	0.219932	-3.29468	0.000985348	0.0135379	FALSE	978.603	926.828	940.394	922.098	551.664	583.186	559.886	585.298
ENSDARG00000101047	918.356	-0.38069	0.115598	-3.29323	0.000990429	0.0136002	FALSE	1122.15	1113.7	1060.94	1035.14	866.474	806.066	885.181	767.689
ENSDARG00000060594	3469.31	-0.266568	0.0809786	-3.29183	0.00099537	0.0136382	FALSE	4079.1	4308.49	4120.02	3971.88	3495.83	3348.72	3420.46	3433.85
ENSDARG00000032705	1725.32	0.370652	0.112593	3.29196	0.000994933	0.0136382	FALSE	1541.92	1738.64	1261.77	1603.83	1995.35	2126.85	1767.66	2055.62
ENSDARG00000104508	241.144	-0.439872	0.133623	-3.29189	0.000995178	0.0136382	FALSE	276.456	272.133	235.392	238.981	163.837	208.904	175.636	204.303
ENSDARG00000015033	157.41	-0.713417	0.216722	-3.29185	0.000995313	0.0136382	FALSE	173.486	194.184	234.966	179.61	101.174	120.197	132.008	124.659
ENSDARG00000102554	41.4925	-0.971784	0.295225	-3.29167	0.000995939	0.0136385	FALSE	52.6702	85.7031	46.504	66.0952	34.4788	32.2924	31.5597	29.8193
ENSDARG00000079274	2656.78	-2.31585	0.703631	-3.29129	0.0009973	0.0136497	FALSE	4150.11	6515.15	7595.86	6378.89	1338.96	1708.94	822.673	1078.19
ENSDARG00000022438	6339.3	-0.220459	0.0670314	-3.2889	0.0010058	0.0137212	FALSE	6569.51	6650.58	6813.86	6922.42	5522.49	6063.46	5790.71	5763.47
ENSDARG00000040492	1381.79	-0.221953	0.0674826	-3.28904	0.00100529	0.0137212	FALSE	1635.27	1417.49	1624.38	1588.91	1366.09	1278.54	1329.43	1397.76
ENSDARG00000044092	3503.33	-0.287102	0.0872873	-3.28916	0.00100486	0.0137212	FALSE	3702.02	3611.03	3849.14	3961.14	3095.99	3391.77	2824.21	3083.49
ENSDARG00000097815	83.0855	-0.744463	0.226338	-3.28916	0.00100487	0.0137212	FALSE	85.5573	146.407	96.6469	125.47	62.98	73.6278	57.5695	78.3611
ENSDARG00000036135	275.3	-0.747877	0.227342	-3.28966	0.00100309	0.0137212	FALSE	377.773	469.81	376.869	355.764	216.62	281.771	208.607	233.909
ENSDARG00000069323	2.29394	-5.0688	1.54105	-3.28919	0.00100476	0.0137212	FALSE	10.2487	1.06544	7.94943	6.33922	0	0	0	0
ENSDARG00000037421	3638.35	0.253658	0.0771938	3.286	0.00101622	0.0138404	FALSE	3189.29	3444.24	3181.12	3586.96	3992.61	4154.5	3581.79	4254.58
ENSDARG00000018825	670.523	0.487617	0.148391	3.28602	0.00101614	0.0138404	FALSE	525.016	530.5	627.445	523.261	720.827	783.275	750.143	841.067
ENSDARG00000025797	218.984	-0.962822	0.292992	-3.28617	0.00101559	0.0138404	FALSE	221.548	210.295	182.79	268.912	129.164	123.234	103.695	97.0726
ENSDARG00000101695	475.274	-1.38198	0.420586	-3.28585	0.00101675	0.0138404	FALSE	732.876	811.032	863.186	817.102	216.107	189.847	436.615	395.297
ENSDARG00000045071	1001.75	0.276339	0.0841161	3.2852	0.00101909	0.0138497	FALSE	789.905	862.677	815.512	941.099	996.878	966.707	1083.95	1089.82
ENSDARG00000003444	397.488	-0.300109	0.0913507	-3.28524	0.00101896	0.0138497	FALSE	456.94	421.912	433.185	432.273	355.664	343.016	352.83	363.471
ENSDARG00000087601	1033.89	0.360902	0.109857	3.28521	0.00101906	0.0138497	FALSE	767.942	955.369	910.731	1060.44	1229.38	1082.1	1189.49	1253.34
ENSDARG00000104080	227.166	0.481243	0.146512	3.28465	0.00102108	0.0138692	FALSE	199.278	180.284	153.858	203.707	267.953	294.197	241.759	222.625
ENSDARG00000039832	418.929	-1.19565	0.364071	-3.2841	0.00102307	0.0138887	FALSE	590.075	643.772	751.995	561.128	227.461	293.278	261.137	330.385
ENSDARG00000088817	331.006	0.418918	0.127565	3.28395	0.00102364	0.0138889	FALSE	266.906	325.815	290.43	259.086	384.499	353.755	352.407	438.875
ENSDARG00000057481	1593.83	0.268657	0.0818325	3.28301	0.00102704	0.0139276	FALSE	1464.12	1419.27	1352.58	1467.16	1909.52	1616.79	1654.2	1686.94
ENSDARG00000010602	62.145	0.805247	0.245311	3.28255	0.00102871	0.0139427	FALSE	44.0076	31.0338	35.7904	34.4862	64.8357	52.4392	80.1944	54.1614
ENSDARG00000093193	116.756	-0.954667	0.290954	-3.28116	0.00103381	0.0140042	FALSE	97.5205	229.494	128.291	150.386	76.3764	66.8521	82.0437	86.9685
ENSDARG00000092044	218.342	-0.827425	0.252198	-3.28086	0.00103492	0.0140116	FALSE	318.779	262.368	391.977	353.451	187.786	143.587	217.629	199.09
ENSDARG00000100869	244.437	-0.428266	0.130567	-3.28006	0.00103786	0.0140439	FALSE	315.772	362.22	266.714	288.618	213.891	248.127	227.101	225.667
ENSDARG00000103013	1294.33	0.356833	0.108815	3.27928	0.00104074	0.0140644	FALSE	1217.76	1040.43	1144.11	1065.81	1366.23	1537.09	1503.06	1310.82
ENSDARG00000032816	293.673	-0.550556	0.167891	-3.27925	0.00104085	0.0140644	FALSE	335.047	310.036	321.539	312.792	200.501	218.353	206.439	248.822
ENSDARG00000079068	100.753	0.589751	0.179847	3.27919	0.00104106	0.0140644	FALSE	81.3403	79.9937	73.9135	89.3126	143.297	122.176	123.383	98.5669
ENSDARG00000025338	1367.9	-0.419471	0.127956	-3.27823	0.00104459	0.0141045	FALSE	1428.54	1430.71	1568.09	1578.95	917.986	1098.65	1150.88	1326.59
ENSDARG00000101851	147.758	0.65071	0.198558	3.27718	0.0010485	0.0141497	FALSE	114.317	99.487	132.981	116.239	204.013	221.421	126.879	175.916
ENSDARG00000077911	14.9501	-2.21696	0.67661	-3.27657	0.00105076	0.0141726	FALSE	41.5776	7.39034	28.7132	25.2066	2.83176	5.86383	5.558	8.27594
ENSDARG00000067567	386.558	0.581661	0.177644	3.27431	0.00105922	0.0142737	FALSE	250.586	399.204	276.908	363.517	534.421	499.054	425.034	476.469
ENSDARG00000076386	1167.2	-0.6658	0.203344	-3.27426	0.0010594	0.0142737	FALSE	1327.67	1377.56	1609.85	1670.69	818.353	1007.56	895.596	1053.05
ENSDARG00000090424	1452.8	0.275984	0.084304	3.27368	0.00106158	0.0142954	FALSE	1212.5	1149.13	1407.1	1359.01	1512.34	1612.22	1524.82	1566.42
ENSDARG00000053155	388.729	-0.333289	0.101834	-3.27286	0.00106467	0.0143293	FALSE	410.564	447.287	466.08	411.562	339.126	316.352	349.183	375.29
ENSDARG00000103983	121.825	-0.573105	0.175139	-3.27229	0.0010668	0.0143503	FALSE	166.334	150.147	172.301	139.096	101.032	125.221	94.3811	100.415
ENSDARG00000086059	22.7478	1.21323	0.370876	3.27126	0.00107068	0.0143948	FALSE	14.7746	12.8434	14.1399	11.9403	35.3928	25.2577	24.5579	38.5292
ENSDARG00000034714	311.691	-0.370606	0.113307	-3.2708	0.00107243	0.0144105	FALSE	413.158	357.561	399.591	347.734	299.785	277.915	285.322	308.679
ENSDARG00000051896	42.4133	-1.38276	0.422799	-3.2705	0.00107357	0.0144182	FALSE	55.8903	47.7029	142.19	36.7334	29.2522	33.3064	17.9741	23.8301
ENSDARG00000026028	1030.82	-0.386424	0.118167	-3.27016	0.00107486	0.0144226	FALSE	1206.41	1122.26	1202.88	1310.96	954.589	847.936	889.572	1013.85
ENSDARG00000091013	50.0349	-1.03456	0.31637	-3.27011	0.00107505	0.0144226	FALSE	98.3341	88.8477	73.6638	73.6667	28.01	34.7357	53.0062	47.1098
ENSDARG00000088933	28.6714	-1.38566	0.423791	-3.26967	0.00107672	0.0144372	FALSE	34.2806	51.3142	59.6359	45.7688	14.7582	30.2271	9.58603	18.7838
ENSDARG00000005643	775.49	-0.324302	0.0992467	-3.26763	0.00108451	0.0145262	FALSE	869.182	945.47	896.911	990.076	738.436	735.954	779.192	705.381
ENSDARG00000086254	261.873	-0.638006	0.195244	-3.26774	0.00108411	0.0145262	FALSE	244.628	370.328	457.087	324.55	237.123	245.417	186.968	229.042
ENSDARG00000087012	4.76006	4.65527	1.42494	3.26699	0.00108698	0.0145515	FALSE	1.45507	0	0	0	2.90493	7.07923	20.9056	2.2059
ENSDARG00000035652	1561.17	-0.580446	0.177727	-3.26594	0.00109102	0.0145977	FALSE	1494.6	1562.94	1733.23	1796.8	1106.79	1058.53	964.811	1276.67
ENSDARG00000093313	7434.88	-0.297779	0.0911899	-3.26548	0.00109279	0.0145981	FALSE	7876.99	8495.09	8254.68	7635.3	6534.6	6769.98	6044.51	6898.12
ENSDARG00000102895	24.496	1.91156	0.585362	3.26561	0.0010923	0.0145981	FALSE	7.37387	4.27396	8.0477	3.65937	15.0639	29.2393	18.1058	24.2965
ENSDARG00000038405	8.96643	-2.60606	0.798055	-3.26552	0.00109263	0.0145981	FALSE	22.9129	11.5937	35.8304	11.524	0.945142	1.03516	10.3118	1.13152
ENSDARG00000103479	1524.4	0.188071	0.0576167	3.26418	0.0010978	0.0146493	FALSE	1444.67	1378.46	1395.85	1357.35	1653.68	1551.07	1571.43	1568.76
ENSDARG00000099877	140.302	-0.59015	0.180795	-3.26419	0.00109777	0.0146493	FALSE	185.662	151.706	188.614	168.788	93.5504	108.825	109.394	150.376
ENSDARG00000028099	1624.62	0.252005	0.0772186	3.26353	0.00110035	0.0146756	FALSE	1453.13	1388.89	1348.52	1553.63	1763.39	1628.58	1712	1738.08
ENSDARG00000059001	297.565	-0.487707	0.149456	-3.26322	0.00110153	0.0146835	FALSE	301.74	282.171	256.536	305.934	192.754	209.089	221.029	194.151
ENSDARG00000008287	245.984	-0.472614	0.144866	-3.26242	0.00110464	0.0147171	FALSE	286.648	306.761	361.19	259.287	220.648	202.228	236.473	214.193
ENSDARG00000104016	57.9163	-1.3138	0.402746	-3.26211	0.00110586	0.0147256	FALSE	94.942	71.0267	72.8613	65.5887	40.3921	12.1397	41.0052	29.9672
ENSDARG00000092067	1935.56	0.201326	0.0617197	3.26194	0.00110652	0.0147265	FALSE	1714.48	1706.72	1812.27	1742.49	2118.87	1962.39	1960.07	1981.13
ENSDARG00000009505	3225.21	-0.387599	0.118887	-3.26024	0.00111317	0.0148072	FALSE	3367.04	3565.84	3621.81	3740.1	2762.71	2901.12	2460.51	2804.21
ENSDARG00000102656	35.2536	1.18339	0.362997	3.26004	0.00111395	0.0148097	FALSE	14.9991	8.55287	28.2273	20.0875	41.3822	47.2503	28.7285	47.6919
ENSDARG00000092722	679.398	0.327399	0.100444	3.25953	0.00111598	0.0148289	FALSE	596.39	544.177	573.85	636.639	832.457	711.69	749.085	657.396
ENSDARG00000069043	252.503	-0.494657	0.151785	-3.25893	0.00111832	0.0148521	FALSE	270.939	329.472	299.407	298.529	199.739	225.29	205.151	221.679
ENSDARG00000097433	123.217	1.26842	0.38925	3.25862	0.00111956	0.0148607	FALSE	17.7515	107.018	42.4442	89.0641	209.937	174.706	119.622	117.818
ENSDARG00000025269	3705.49	-0.258283	0.0792721	-3.25818	0.00112129	0.0148758	FALSE	3916.97	3977.42	3824.32	3973.96	3459.37	3251.6	3378.85	3029.17
ENSDARG00000041586	417.662	0.454203	0.13947	3.25663	0.00112745	0.0149496	FALSE	325.558	364.249	367.822	307.639	527.74	391.255	503.496	448.069
ENSDARG00000067673	373.297	0.31788	0.0976429	3.25553	0.00113179	0.0149973	FALSE	324.316	355.457	316.168	340.434	371.542	415.389	454.472	426.596
ENSDARG00000101973	97.9565	0.878468	0.269848	3.25542	0.00113224	0.0149973	FALSE	39.3485	76.1824	49.125	77.5961	131.123	137.38	72.261	108.099
ENSDARG00000076294	69.4112	-1.18061	0.362683	-3.25522	0.00113306	0.0150002	FALSE	101.282	125.338	108.193	89.5896	65.258	43.1758	27.0294	51.5042
ENSDARG00000095459	515.966	0.432416	0.132862	3.25463	0.00113538	0.015023	FALSE	393.224	425.994	410.941	405.193	476.141	548.262	705.47	478.443
ENSDARG00000063075	1408.48	0.294041	0.0903515	3.25441	0.00113628	0.0150269	FALSE	1326.07	1275.88	1280.39	1429.45	1789.49	1501.44	1647.38	1575.01
ENSDARG00000045304	332.21	-0.325889	0.10018	-3.25304	0.00114179	0.0150839	FALSE	348.357	362.535	406.211	384.616	300.266	296.898	292.327	311.868
ENSDARG00000005593	216.792	0.528486	0.162455	3.25312	0.00114144	0.0150839	FALSE	195.659	187.628	131.122	159.974	237.369	276.646	209.913	243.922
ENSDARG00000054036	278.811	0.588265	0.181029	3.24956	0.00115582	0.0152612	FALSE	190.215	256.758	217.229	239.142	366.495	346.44	321.351	326.519
ENSDARG00000025658	10.7359	1.70727	0.525417	3.24935	0.00115668	0.0152645	FALSE	8.76582	7.5034	6.90826	1.80853	21.1217	22.2092	16.8041	18.7666
ENSDARG00000040527	328.005	-0.342691	0.105477	-3.24897	0.00115823	0.0152769	FALSE	377.701	355.067	373.789	365.635	279.289	318.144	269.349	293.472
ENSDARG00000074908	7451.75	-0.30591	0.0941823	-3.24806	0.00116195	0.0153179	FALSE	8540.48	9565.49	9206.46	8264.28	6796.27	7338.71	7244.64	7400.71
ENSDARG00000071691	5439.71	-0.215838	0.0664601	-3.24763	0.00116372	0.0153332	FALSE	6291.98	6346.92	6110.37	5913.62	5027.31	5570.12	5382.4	5253.39
ENSDARG00000099923	547.404	-0.332826	0.10249	-3.24738	0.00116471	0.0153382	FALSE	617.243	579.124	651.723	571.942	496.576	498.082	438.564	487.163
ENSDARG00000102452	2839.58	-0.183842	0.0566209	-3.2469	0.00116669	0.0153482	FALSE	3001.59	3050.99	2930.1	2770.33	2509.48	2699.23	2607.87	2524.99
ENSDARG00000086744	83.8644	-0.658953	0.202945	-3.24695	0.00116648	0.0153482	FALSE	103.624	145.435	92.08	100.596	57.7461	67.3473	83.4467	71.6413
ENSDARG00000030254	26.1446	-1.89182	0.582729	-3.24648	0.00116844	0.0153631	FALSE	46.4325	38.9179	72.1426	65.6044	14.8763	20.834	15.6934	8.70756
ENSDARG00000077023	237.123	0.600923	0.185155	3.24552	0.00117237	0.0153986	FALSE	193.881	194.19	173.005	188.622	337.292	278.782	249.326	270.271
ENSDARG00000033610	23.6202	1.56568	0.482398	3.24563	0.00117193	0.0153986	FALSE	6.29486	18.4493	11.0604	5.45436	28.9293	17.3873	25.92	42.6841
ENSDARG00000009822	289.248	-0.416599	0.12839	-3.2448	0.00117532	0.0154293	FALSE	336.635	300.546	325.427	333.372	255.034	217.733	271.664	226.205
ENSDARG00000055797	268.308	0.526142	0.162175	3.2443	0.00117741	0.0154487	FALSE	219.761	193.794	208.301	196.714	272.321	298.598	324.526	281.749
ENSDARG00000021383	399.189	-0.427349	0.131731	-3.24412	0.00117816	0.0154504	FALSE	481.118	445.22	537.813	506.358	437.422	347.456	314.323	366.259
ENSDARG00000052376	238.835	-0.532893	0.164323	-3.24296	0.00118296	0.0155053	FALSE	277.923	265.853	260.829	316.086	190.536	250.92	159.348	174.603
ENSDARG00000057590	347.013	0.553746	0.170796	3.24216	0.00118629	0.0155407	FALSE	270.462	228.445	255.6	199.887	350.407	350.297	357.294	339.273
ENSDARG00000104489	55.9676	0.916572	0.282785	3.24124	0.00119013	0.0155829	FALSE	38.2446	35.398	21.2316	42.7372	55.2363	61.9682	86.3275	55.998
ENSDARG00000092061	46.6541	3.53799	1.09187	3.24031	0.00119401	0.0156256	FALSE	0	7.30013	0	19.1322	93.1561	43.6365	92.2952	83.3914
ENSDARG00000102805	286.391	-0.568299	0.175445	-3.23918	0.00119874	0.0156793	FALSE	322.269	287.774	400.928	368.512	243.292	239.31	197.235	251.596
ENSDARG00000097738	198.681	-0.478165	0.14763	-3.23895	0.0011997	0.0156816	FALSE	243.635	229.518	251.543	229.21	175.43	184.758	171.125	152.479
ENSDARG00000103371	153.39	0.691563	0.213522	3.23884	0.00120017	0.0156816	FALSE	84.3031	73.2083	100.042	79.2547	124.689	171.476	110.658	137.343
ENSDARG00000101479	37.6797	-1.43418	0.442829	-3.23868	0.00120086	0.0156825	FALSE	41.3683	28.8974	62.6173	35.8219	15.8347	14.1442	17.0843	15.4118
ENSDARG00000094676	2.20388	-5.0833	1.56966	-3.23847	0.00120172	0.0156855	FALSE	2.94603	9.55295	3.00895	10.0085	0	0	0	0
ENSDARG00000052450	257.21	-0.478484	0.147827	-3.23677	0.00120889	0.0157709	FALSE	294.996	267.33	303.367	292.609	186.699	247.339	173.988	223.459
ENSDARG00000008858	138.675	-0.479321	0.148094	-3.2366	0.00120964	0.0157725	FALSE	175.309	203.667	180.587	174.517	138.261	115.085	132.325	141.3
ENSDARG00000075067	236.236	0.605483	0.187109	3.23599	0.00121222	0.0157979	FALSE	195.865	147.895	192.614	237.925	337.667	246.29	249.05	346.685
ENSDARG00000101853	139.487	0.971549	0.300301	3.23525	0.00121537	0.0158308	FALSE	125.027	90.3003	106.771	57.6054	256.206	227.342	150.347	102.623
ENSDARG00000021539	1894.81	0.23718	0.0733297	3.23444	0.00121882	0.0158628	FALSE	1667.03	1800.31	1713.92	1758.79	2144.56	1955.98	2006.53	2076.32
ENSDARG00000013855	699.614	-0.491221	0.151875	-3.23437	0.00121909	0.0158628	FALSE	640.22	711.84	788.421	783.252	551.672	598.825	454.704	475.505
ENSDARG00000040387	227.097	0.828086	0.256179	3.23246	0.00122731	0.0159614	FALSE	156.269	139.369	157.803	162.717	287.235	276.631	228.863	301.337
ENSDARG00000093631	3.98159	4.64284	1.4369	3.23115	0.00123294	0.0160263	FALSE	0	0	0	0.877065	0.925213	11.7162	6.11603	14.1488
ENSDARG00000046012	328.195	-0.685506	0.212251	-3.22969	0.00123924	0.0160999	FALSE	363.286	429.345	318.597	400.355	201.833	280.223	181.054	279.085
ENSDARG00000076179	653.421	-0.427635	0.132424	-3.22928	0.00124102	0.0161099	FALSE	769.35	776.418	701.848	865.504	545.692	682.206	493.135	594.15
ENSDARG00000038682	3.58789	4.61589	1.42941	3.22922	0.0012413	0.0161099	FALSE	0	0	0	0	4.79313	7.07315	2.10749	5.53011
ENSDARG00000099152	52.7205	-0.765269	0.237029	-3.22859	0.00124403	0.0161287	FALSE	75.7204	76.2076	93.2004	66.7202	48.2743	32.3315	50.2212	52.9325
ENSDARG00000102761	35.5759	0.930465	0.28819	3.22865	0.00124375	0.0161287	FALSE	28.7896	19.0057	22.3681	19.5591	35.9282	40.7716	42.4284	50.0271
ENSDARG00000097639	43.1264	-1.00802	0.312333	-3.22738	0.00124931	0.0161887	FALSE	51.1871	78.2166	79.0996	56.1162	28.7515	37.3419	25.2363	40.8585
ENSDARG00000093773	46.6511	0.944727	0.292809	3.22643	0.00125347	0.0162342	FALSE	19.5507	28.0086	20.5526	38.3242	45.2433	59.7128	56.0562	47.0452
ENSDARG00000089921	435.79	-0.295411	0.0915828	-3.22562	0.001257	0.0162716	FALSE	456.98	488.227	499.187	486.812	358.576	384.961	428.52	405.644
ENSDARG00000100832	50.7782	1.09134	0.338541	3.22366	0.00126566	0.0163752	FALSE	26.2227	30.0483	17.6733	36.0794	51.1315	61.6249	60.7154	61.7635
ENSDARG00000101199	17730.7	-0.366271	0.113723	-3.22072	0.0012787	0.0165183	FALSE	18938.6	20495.6	22470	21958.9	14904.4	17621.8	14732.5	17804.9
ENSDARG00000101482	405.97	-0.450511	0.139867	-3.22099	0.00127748	0.0165183	FALSE	400.455	546.327	456.214	459.84	290.597	327.354	332.726	415.744
ENSDARG00000016886	125.632	-0.71713	0.222661	-3.22072	0.00127868	0.0165183	FALSE	135.152	140.104	153.505	131.76	99.8689	65.5241	104.638	70.7733
ENSDARG00000104631	274.857	-0.49452	0.15356	-3.22036	0.00128031	0.0165221	FALSE	242.951	333.937	332.018	295.486	196.308	221.321	218.435	221.588
ENSDARG00000102435	302.522	-0.640519	0.198894	-3.2204	0.00128011	0.0165221	FALSE	326.817	225.885	340.425	367.245	179.537	179.547	241.378	208.847
ENSDARG00000038577	3942.17	-0.199395	0.0619244	-3.21997	0.00128206	0.0165362	FALSE	4197.56	4229.95	4159.77	3979.75	3517.73	3792.57	3492.46	3623.23
ENSDARG00000004055	732.348	-0.271622	0.084368	-3.21949	0.0012842	0.0165468	FALSE	805.121	782.134	816.808	787.976	690.833	671.5	689.865	590.25
ENSDARG00000104392	25.4324	1.23296	0.382955	3.21959	0.00128373	0.0165468	FALSE	17.6186	13.9066	12.945	13.6236	21.8969	38.3121	47.5319	27.641
ENSDARG00000021250	409.973	-0.351565	0.109208	-3.21922	0.00128542	0.016554	FALSE	403.158	512.006	500.581	479.116	357.179	355.133	411.865	366.125
ENSDARG00000039747	68.3835	-1.3396	0.416178	-3.21882	0.00128721	0.0165686	FALSE	100.915	141.078	146.615	127.876	75.6664	32.4967	32.0657	63.8452
ENSDARG00000020840	987.042	0.255643	0.0794713	3.2168	0.00129631	0.0166771	FALSE	1005.58	835.246	822.559	858.9	1046.96	1006.78	1102.01	1031.26
ENSDARG00000102948	141.58	-0.532382	0.165508	-3.21665	0.00129698	0.0166772	FALSE	145.594	192.141	165.753	187.512	119.751	116.196	121.347	122.4
ENSDARG00000076611	358.794	0.450235	0.139989	3.21622	0.00129893	0.0166937	FALSE	257.63	285.59	356.742	284.047	410.925	440.965	410.13	361.558
ENSDARG00000031049	1192.71	0.202821	0.0630684	3.21589	0.0013004	0.0166955	FALSE	1099.61	1093.99	1123.77	1089.2	1324.04	1233.06	1276.56	1237.22
ENSDARG00000015575	1241.98	-0.422687	0.131436	-3.21591	0.00130033	0.0166955	FALSE	1152.49	1172.57	1336.24	1404.29	868.039	882.013	905.22	1127.38
ENSDARG00000055561	373.852	-0.388614	0.120849	-3.21571	0.00130123	0.0166976	FALSE	445.907	458.052	478.632	437.81	345.598	339.607	389.373	316.058
ENSDARG00000030824	714.345	-0.270457	0.0841316	-3.21469	0.00130588	0.0167486	FALSE	709.191	810.94	772.195	812.051	668.322	636.764	642.313	630.582
ENSDARG00000096772	21.113	1.53302	0.476929	3.21435	0.00130741	0.0167596	FALSE	2.92349	19.2903	13.8297	5.42814	38.3685	17.1593	36.7813	29.8108
ENSDARG00000071553	6.39787	3.83694	1.1939	3.2138	0.00130992	0.0167833	FALSE	1.46122	0	0	0.904485	5.77117	8.0838	14.7047	2.20916
ENSDARG00000006522	29.2225	-1.26783	0.394604	-3.21292	0.00131395	0.0168263	FALSE	23.0008	45.3203	66.5557	40.9839	21.6496	8.19657	16.3508	27.6801
ENSDARG00000021669	7104.06	-0.247158	0.076956	-3.21168	0.00131962	0.0168904	FALSE	7644.18	7918.53	7890.16	7513.61	6290.49	6481.04	6506.99	6813.64
ENSDARG00000056950	4805.43	0.289129	0.0901185	3.20832	0.00133512	0.0170799	FALSE	4611.33	4563.31	4540.66	4252.48	5133.5	5401.58	5777.11	5640.53
ENSDARG00000040194	7.6679	4.37559	1.36454	3.20664	0.00134296	0.0171715	FALSE	0	0	0	0	3.87169	5.0573	2.09194	5.51669
ENSDARG00000025789	9948.24	0.168108	0.0524443	3.20545	0.00134852	0.0172338	FALSE	9564.67	9761.48	9167.42	9425.25	11184	10484.1	10185.7	10746.9
ENSDARG00000037012	4258.7	0.327493	0.102214	3.204	0.00135533	0.0173044	FALSE	3292.02	3421.06	3188.71	3107.39	4135.76	4277.59	3893.2	4015.64
ENSDARG00000010603	296.395	-0.443217	0.138339	-3.20383	0.00135611	0.0173044	FALSE	369.757	422.273	362.423	417.903	308.958	342.193	244.81	260.555
ENSDARG00000090228	5967.78	-1.2077	0.376939	-3.20398	0.00135543	0.0173044	FALSE	6902.62	7462.84	8312.43	8064.48	2870.53	3211.57	3514.14	3714.21
ENSDARG00000086775	190.267	-0.793815	0.247803	-3.20341	0.00135809	0.0173209	FALSE	288.5	270.404	370.34	201.445	123.855	171.587	219.137	139.088
ENSDARG00000089645	225.696	-0.720699	0.224996	-3.20316	0.00135928	0.0173272	FALSE	347.551	306.097	311.994	292.144	196.519	189.603	170.879	205.572
ENSDARG00000005230	3482.88	-0.246543	0.0769853	-3.20247	0.00136254	0.0173356	FALSE	3646.32	3941.59	4016.1	3676.22	2992.42	3223.16	3372.49	3295.65
ENSDARG00000012801	1161.36	0.534344	0.166845	3.20263	0.00136176	0.0173356	FALSE	956.455	1188.19	892.012	1029.29	1427.47	1682.36	1195.63	1585.1
ENSDARG00000098094	23.0908	-1.43716	0.448769	-3.20244	0.0013627	0.0173356	FALSE	54.8706	21.445	54.3561	30.1468	9.82737	12.8572	21.3868	15.0056
ENSDARG00000008029	343.931	-1.92989	0.602623	-3.20248	0.00136249	0.0173356	FALSE	583.792	548.527	733.792	842.866	230.735	183.882	63.0789	233.318
ENSDARG00000093647	29.3847	-1.40617	0.439142	-3.20208	0.00136439	0.0173482	FALSE	48.4546	23.5336	50.7909	28.1572	13.3269	13.1065	13.7326	16.585
ENSDARG00000043342	685.593	-0.412018	0.128768	-3.19969	0.00137576	0.0174839	FALSE	557.042	631.432	685.265	749.354	484.699	469.959	491.072	530.223
ENSDARG00000056026	390.058	-0.399052	0.124763	-3.19847	0.0013816	0.0175492	FALSE	469.219	446.892	489.967	389.922	352.031	362.365	340.49	304.733
ENSDARG00000061688	2880.85	0.233907	0.0731652	3.19696	0.00138883	0.0176261	FALSE	2636.53	2380.46	2672.39	2580.87	3303.29	3042.71	2975.1	2752.91
ENSDARG00000044642	184.16	-0.706381	0.220957	-3.19692	0.00138906	0.0176261	FALSE	181.617	288.048	199.27	213.884	111.849	129.133	140.09	161.301
ENSDARG00000034092	25.3598	1.28817	0.403303	3.19405	0.0014029	0.0177928	FALSE	19.0426	11.2412	8.46128	15.066	35.883	30.1463	39.8769	22.2875
ENSDARG00000058256	808.943	0.507021	0.158761	3.19361	0.00140504	0.0178108	FALSE	577.772	848.415	878.325	606.635	916.096	1128.32	997.4	1091.8
ENSDARG00000036501	552.383	0.271266	0.0849517	3.19318	0.00140717	0.0178109	FALSE	504.657	474.105	497.878	493.003	577.677	608.993	614.274	574.839
ENSDARG00000077572	37.1302	1.30152	0.407568	3.19337	0.00140623	0.0178109	FALSE	41.0732	20.6775	8.67866	14.4905	69.1546	41.3665	32.503	48.4625
ENSDARG00000092052	15.4577	-1.91141	0.598575	-3.19327	0.00140673	0.0178109	FALSE	35.2283	39.9439	22.7601	22.6456	7.33512	7.60437	3.19976	13.6159
ENSDARG00000077256	6920.45	0.291519	0.0913048	3.19282	0.00140893	0.0178241	FALSE	5171.25	5416.28	4791.14	5374.21	6971.81	5697.71	6846.7	5883.62
ENSDARG00000010149	36030.8	-0.227551	0.0712749	-3.19259	0.00141005	0.0178293	FALSE	40218.6	40107.2	39958.9	39039.3	33160.7	36225.5	32148.9	34539.6
ENSDARG00000105255	1455.49	0.272184	0.0852675	3.19212	0.00141233	0.0178492	FALSE	1101.58	1393.24	1114.43	1263.65	1509.34	1515.28	1384.19	1481.16
ENSDARG00000007040	78.7822	-1.50479	0.471609	-3.19076	0.00141897	0.017924	FALSE	114.332	140.231	158.848	152.362	43.9164	50.4324	39.0076	66.3042
ENSDARG00000043371	14470.7	-0.225237	0.0706073	-3.18999	0.00142276	0.0179539	FALSE	15032.4	14939.2	16364.9	15544.2	12992.4	13748	12480.9	13718.2
ENSDARG00000078541	57.1235	-1.24255	0.389511	-3.19002	0.00142262	0.0179539	FALSE	54.1231	118.922	87.0416	57.0316	26.8254	26.2389	51.5362	29.8176
ENSDARG00000010556	83.2979	0.769575	0.241286	3.18947	0.00142532	0.0179771	FALSE	49.4751	48.3141	53.891	51.3609	96.663	64.6743	74.2262	111.354
ENSDARG00000090394	213.326	0.797795	0.250213	3.18846	0.00143034	0.0180314	FALSE	234.692	120.163	156.287	172.373	272.737	317.167	274.46	319.909
ENSDARG00000058556	546.048	-1.0519	0.329923	-3.18831	0.00143107	0.0180315	FALSE	836.615	970.223	951.198	1044.42	476.119	582.339	372.427	403.279
ENSDARG00000061004	429.494	-0.307583	0.0964951	-3.18755	0.00143485	0.01807	FALSE	519.213	484.46	501.197	425.654	365.59	394.324	417.51	378.271
ENSDARG00000039878	1370.07	-0.226898	0.0712027	-3.18665	0.00143928	0.0181168	FALSE	1467.86	1564.02	1449.83	1448.2	1278.69	1281.76	1231.84	1273.99
ENSDARG00000031845	179.395	0.469598	0.147373	3.18646	0.00144028	0.0181202	FALSE	158.214	133.472	158.027	118.438	184.554	190.471	229.365	179.652
ENSDARG00000104713	262.697	-0.495265	0.155458	-3.18585	0.00144329	0.018149	FALSE	311.526	356.099	346.065	317.214	278.547	230.829	190.314	244.411
ENSDARG00000099518	102.416	1.03988	0.326427	3.18564	0.00144436	0.0181534	FALSE	59.7161	76.2007	74.5906	73.0462	129.325	149.525	185.239	120.21
ENSDARG00000042641	1095.95	-0.629951	0.197771	-3.18525	0.00144628	0.0181684	FALSE	922.688	1137.28	881.618	929.512	581.179	558.584	602.313	760.049
ENSDARG00000041068	2815.05	-0.318623	0.100055	-3.18447	0.00145017	0.0182081	FALSE	3137.9	3444.21	3665.19	3497.45	2760.97	2955.64	2513.63	2794.09
ENSDARG00000039453	117.692	-0.596436	0.187336	-3.18378	0.00145368	0.018243	FALSE	129.967	144.735	126.219	108.468	68.2185	78.751	110.219	79.4707
ENSDARG00000088357	1960.06	-0.195084	0.0613011	-3.1824	0.00146062	0.0182935	FALSE	2195.31	2244.81	2217.58	2290.93	1922.86	1960.59	1953.99	1982.49
[truncated: 28,344 more rows]
