# Supplementary material for: The cation exchanger Letm1, circadian rhythms, and NAD(H) levels interconnect in diurnal zebrafish
Source: Life Sci Alliance. 2022 Jun 13;5(9):e202101194. doi: 10.26508/lsa.202101194 (PMC9191620; doi:10.26508/lsa.202101194)
Supplement: Supplementary file 3 [file LSA-2021-01194_TableS3.xlsx]

## Sheet: Sheet1
geneid	baseMean	log2FoldChange	lfcSE	stat	pvalue	padj	meanFilter	181445	181446	181447	181448	181456	181457	181460	181461
ENSDARG00000099710	579.583	3.17606	0.164207	19.3418	2.38963e-83	5.99176e-79	FALSE	130.963	70.8608	114.64	69.382	821.605	799.74	950.829	869.007
ENSDARG00000104929	620.971	2.08752	0.116326	17.9454	5.2147e-72	6.53766e-68	FALSE	246.087	240.431	243.295	277.696	1292.76	1015.35	934.298	1047.82
ENSDARG00000034933	530.394	1.93321	0.117138	16.5037	3.4523e-61	2.88543e-57	FALSE	202.32	169.247	160.687	217.778	639.345	757.12	744.787	711.799
ENSDARG00000043797	2586.58	-1.05646	0.0687543	-15.3658	2.77595e-53	1.74011e-49	FALSE	4268.9	3955.54	3923.27	3751.69	1935.73	2033.15	1923.59	1751.71
ENSDARG00000071029	121.897	-4.09397	0.278964	-14.6756	9.2375e-49	4.63242e-45	FALSE	315.268	417.74	261.949	283.808	22.0503	20.7073	19.7808	12.9079
ENSDARG00000103019	644.06	-3.20806	0.230527	-13.9162	5.05289e-44	2.1116e-40	FALSE	1534.55	2064.33	1668.14	1125.59	271.693	125.054	146.198	149.875
ENSDARG00000071345	304.963	-2.2687	0.163357	-13.888	7.49305e-44	2.68401e-40	FALSE	546.438	528.059	758.961	795.143	141.508	120.996	148.097	135.857
ENSDARG00000056510	856.8	-1.23668	0.0900277	-13.7366	6.12576e-43	1.91997e-39	FALSE	1319.8	1265.69	1380.83	1475.08	497.529	612.598	578.629	618.588
ENSDARG00000043279	323.27	-2.53728	0.195893	-12.9523	2.2793e-38	6.35012e-35	FALSE	624.586	775.464	535.731	737.013	72.7222	107.587	167.275	111.921
ENSDARG00000010420	1183.72	1.80043	0.139494	12.9068	4.11932e-38	1.03288e-34	FALSE	592.952	556.4	615.445	549.628	2240.44	1762.51	2469.63	1588.84
ENSDARG00000036028	3267.39	2.55162	0.197896	12.8938	4.87895e-38	1.11213e-34	FALSE	1207.79	1178.29	1251.04	1141.98	10602.6	5319.29	7870.78	4228.06
ENSDARG00000022832	341.653	-1.82046	0.144722	-12.579	2.75596e-36	5.75859e-33	FALSE	578.825	537.86	597.043	564.56	170.677	117.434	148.627	205.827
ENSDARG00000021184	3182.35	1.07155	0.0852503	12.5694	3.10972e-36	5.99793e-33	FALSE	1980.12	2204.13	1871.62	1939.15	4721.44	4205.75	4120.65	3753.67
ENSDARG00000033029	655.996	1.60159	0.128672	12.4471	1.45026e-35	2.59741e-32	FALSE	334.95	382.8	385.254	369.785	1354.03	1148.32	1071.97	905.79
ENSDARG00000100524	4019.83	1.44541	0.117353	12.3167	7.36308e-35	1.20718e-31	FALSE	2100.5	2186.13	2185.48	2361.62	6061.92	5876.32	7329.86	4797.87
ENSDARG00000103624	3089.71	1.48421	0.120539	12.3131	7.70317e-35	1.20718e-31	FALSE	1316.8	1594.05	1599.67	1877.05	4198.34	4796.75	5105.85	3791.07
ENSDARG00000077090	53.2457	-4.38057	0.359418	-12.1879	3.60374e-34	5.31531e-31	FALSE	115.206	125.507	168.206	138.129	2.94526	4.80166	7.24598	10.4928
ENSDARG00000099873	128.797	-2.03296	0.167084	-12.1673	4.64355e-34	6.46847e-31	FALSE	236.727	213.821	230.642	244.648	50.3235	69.8566	48.7705	57.2428
ENSDARG00000091847	307.133	-12.4479	1.02703	-12.1203	8.25056e-34	1.08881e-30	FALSE	834.579	905.381	979.506	966.132	0	0	0	0
ENSDARG00000094215	209.164	-2.70186	0.227403	-11.8813	1.47982e-32	1.85526e-29	FALSE	404.603	528.735	500.823	495.361	88.404	78.5623	86.2178	44.7433
ENSDARG00000025074	472.949	-1.17047	0.0990519	-11.8167	3.19996e-32	3.82075e-29	FALSE	700.119	736.093	799.199	721.274	340.173	355.43	292.209	327.518
ENSDARG00000092272	115.75	3.03094	0.25681	11.8023	3.79932e-32	4.33019e-29	FALSE	12.0244	17.3967	29.0263	15.7237	143.109	154.929	126.105	193.631
ENSDARG00000037946	230.533	3.84692	0.326562	11.7801	4.94551e-32	5.39146e-29	FALSE	61.4634	49.2744	29.6963	28.9794	1098.98	368	541.894	398.852
ENSDARG00000077717	9707.68	0.630103	0.0536245	11.7503	7.03783e-32	7.35278e-29	FALSE	7991.8	7664.64	7424.71	7949.27	12951.1	11887.8	11677	11507.6
ENSDARG00000053315	232.924	2.02976	0.173628	11.6903	1.42933e-31	1.43356e-28	FALSE	116.362	88.4006	113.203	109.929	473.673	463.652	469.38	340.267
ENSDARG00000104890	928.5	1.17654	0.101621	11.5777	5.34634e-31	5.15593e-28	FALSE	468.83	482.332	571.696	569.261	1156.26	1084.46	1364.93	1133.1
ENSDARG00000103841	134.764	3.09482	0.267602	11.565	6.19882e-31	5.75664e-28	FALSE	26.1769	19.3303	14.6816	21.6141	171.513	174.83	215.77	127.76
ENSDARG00000035309	104.817	-4.09132	0.354513	-11.5407	8.22882e-31	7.3689e-28	FALSE	376.408	151.225	182.12	344.102	7.85613	15.3513	14.4898	23.2241
ENSDARG00000102713	569.586	1.33224	0.115513	11.5333	8.96725e-31	7.75327e-28	FALSE	247.486	295.2	338.315	302.88	671.787	712.241	841.931	767.269
ENSDARG00000104687	974.902	2.21691	0.192595	11.5108	1.16445e-30	9.41853e-28	FALSE	467.621	327.316	431.986	391.449	2774.58	1505.29	1953.5	1285.21
ENSDARG00000005616	126.846	-2.26017	0.19633	-11.5121	1.14696e-30	9.41853e-28	FALSE	210.805	239.962	248.488	269.951	31.1607	53.2934	59.4408	57.3121
ENSDARG00000097247	1023.06	4.04168	0.353788	11.424	3.17174e-30	2.48526e-27	FALSE	146.281	141.659	86.1614	101.355	1872.97	1226.04	2636.93	2061.21
ENSDARG00000037000	542.233	-1.4381	0.126581	-11.3611	6.53275e-30	4.9637e-27	FALSE	774.89	1000.45	993.737	879.095	305.247	359.228	399.068	285.619
ENSDARG00000019294	84.7108	-4.37464	0.386587	-11.3161	1.09279e-29	8.05902e-27	FALSE	223.986	131.408	206.729	286.538	6.92081	17.8301	9.02069	7.41247
ENSDARG00000021208	226.776	-1.41757	0.125689	-11.2784	1.67786e-29	1.20202e-26	FALSE	340.538	402.127	372.288	399.228	145.929	163.381	136.877	123.727
ENSDARG00000056314	1930.49	-1.86075	0.165886	-11.217	3.36345e-29	2.34264e-26	FALSE	3110.34	3464.88	3467.14	3767.43	604.832	1320.28	948.155	929.558
ENSDARG00000030913	2412.33	-0.759933	0.0683236	-11.1226	9.74343e-29	6.60288e-26	FALSE	3192.96	3090.18	3014.56	3026.74	1837.82	1963.66	1635.35	1842.08
ENSDARG00000034344	2407.39	1.2524	0.112755	11.1073	1.15663e-28	7.63193e-26	FALSE	1012.56	1517.2	1202.75	1463.04	3441.84	3018.02	2891.68	3045.56
ENSDARG00000055754	331.745	-11.12	1.00538	-11.0606	1.94894e-28	1.25302e-25	FALSE	1036.32	849.156	1022.43	1066.2	0	0.96416	0.906324	0
ENSDARG00000040553	115.023	5.95505	0.539384	11.0405	2.43791e-28	1.52821e-25	FALSE	0	3.01573	5.59632	3.40751	191.013	145.253	226.911	240.401
ENSDARG00000070960	207.25	-3.22903	0.294546	-10.9627	5.77373e-28	3.53099e-25	FALSE	419.474	410.615	460.291	422.827	31.3607	92.6424	29.7976	29.8607
ENSDARG00000100876	423.71	1.60159	0.146289	10.9481	6.78368e-28	4.04986e-25	FALSE	145.558	165.322	165.68	220.82	505.018	628.592	431.41	564.65
ENSDARG00000054058	5320.04	1.02059	0.0934627	10.9198	9.26938e-28	5.40512e-25	FALSE	4138.47	3844.66	3718.87	3982.09	9346.97	7390.55	8248.79	6831.15
ENSDARG00000104600	846.593	1.73714	0.161313	10.7688	4.83343e-27	2.7544e-24	FALSE	307.641	384.715	324.248	376.125	770.317	1170.28	1246.65	1459.65
ENSDARG00000097137	1784.14	2.23451	0.208265	10.7292	7.42736e-27	4.13852e-24	FALSE	924.662	829.708	418.75	463.32	2657.65	3265.64	3756.22	2701.73
ENSDARG00000052690	4860.78	1.52574	0.14232	10.7205	8.15635e-27	4.44592e-24	FALSE	2581.13	2842.48	3005.39	3045.39	9390.17	7363.06	10498.6	5797.5
ENSDARG00000057498	218.822	-2.6617	0.250737	-10.6155	2.52503e-26	1.34708e-23	FALSE	376.658	380.193	449.544	478.909	33.1576	112.525	53.077	67.7353
ENSDARG00000002197	1138.47	-1.22253	0.115362	-10.5973	3.06632e-26	1.60177e-23	FALSE	1497.53	1872.67	1610.66	1790.65	557.579	774.884	808.147	761.268
ENSDARG00000062132	606.2	-1.9679	0.186462	-10.5539	4.87392e-26	2.49405e-23	FALSE	929.536	1036.99	1185.12	1231.85	166.901	392.838	275.703	285.433
ENSDARG00000100710	316.514	-1.0572	0.100266	-10.5439	5.4186e-26	2.66404e-23	FALSE	479.3	447.698	437.602	466.588	207.798	232.965	205.46	231.699
ENSDARG00000098136	349.363	2.05317	0.194709	10.5448	5.36868e-26	2.66404e-23	FALSE	104.7	123.923	145.777	133.478	441.248	411.963	599.466	661.974
ENSDARG00000060246	1016.9	2.08084	0.197889	10.5152	7.35392e-26	3.4791e-23	FALSE	452.374	488.586	505.239	462.988	2900.41	1653.88	2296.25	1230.75
ENSDARG00000097074	133.91	2.94209	0.279777	10.5159	7.30162e-26	3.4791e-23	FALSE	39.7229	40.6165	18.9936	25.4829	210.266	180.055	310.606	244.416
ENSDARG00000099243	1866.65	1.14016	0.108469	10.5114	7.65396e-26	3.55399e-23	FALSE	957.275	1021.13	1207.65	1228.82	2796.81	2061.55	2531.8	2355.91
ENSDARG00000038424	775.06	3.2133	0.306733	10.4759	1.11473e-25	5.08197e-23	FALSE	206.189	214.885	225.026	215.348	2714.02	1211.87	2919.45	1145.76
ENSDARG00000079497	937.908	1.88232	0.179813	10.4682	1.20905e-25	5.41353e-23	FALSE	499.666	479.057	522.682	431.776	2090.21	1296.62	2467.02	1271.92
ENSDARG00000101135	3249.1	3.27557	0.313147	10.4602	1.316e-25	5.78901e-23	FALSE	797.42	858.286	750.067	837.547	11465.4	7623.8	9100.21	3220.13
ENSDARG00000093052	120.461	4.48371	0.42948	10.4399	1.63029e-25	7.0479e-23	FALSE	8.6895	20.3776	20.4982	7.80174	389.299	172.486	540.809	168.756
ENSDARG00000003869	624.887	-1.20211	0.11527	-10.4286	1.83531e-25	7.79977e-23	FALSE	915.323	900.079	900.276	879.618	326.222	455.368	327.42	450.79
ENSDARG00000004687	666.514	-0.794626	0.0763462	-10.4082	2.27499e-25	9.50718e-23	FALSE	901.101	921.978	938.928	830.761	534.557	526.565	504.248	505.92
ENSDARG00000099101	920.976	2.21822	0.213791	10.3757	3.20005e-25	1.31538e-22	FALSE	348.859	292.739	298.547	316.242	1346.75	2016.63	995.102	1483.38
ENSDARG00000096712	311.338	-1.77081	0.172061	-10.2917	7.67687e-25	3.10468e-22	FALSE	513.419	446.767	483.397	596.569	121.785	138.294	144.983	190.885
ENSDARG00000055270	176.864	2.56614	0.250755	10.2336	1.4015e-24	5.57797e-22	FALSE	76.2764	36.8004	56.062	37.783	315.747	423.395	252.01	223.739
ENSDARG00000045516	907.028	-1.51093	0.148659	-10.1637	2.87967e-24	1.1282e-21	FALSE	1442.65	1449.72	1654.82	1725.01	388.053	716.274	574.572	522.469
ENSDARG00000071644	372.717	1.9859	0.196199	10.1219	4.41836e-24	1.7044e-21	FALSE	126.702	141.674	153.08	78.4503	484.583	547.004	383.306	559.855
ENSDARG00000101967	1884.06	0.679135	0.0674055	10.0754	7.10016e-24	2.69741e-21	FALSE	1362.11	1358.61	1467.84	1513.52	2290.93	2378.1	2358.49	2116.44
ENSDARG00000074686	4962.25	1.11573	0.110793	10.0705	7.4633e-24	2.79306e-21	FALSE	3404.91	3296.71	3390.33	3398.32	8694.96	5869.15	8290.46	6381.12
ENSDARG00000093957	427.835	2.01606	0.200679	10.0462	9.54893e-24	3.52103e-21	FALSE	194.52	184.825	198.716	135.067	525.009	900.79	708.113	743.418
ENSDARG00000015263	601.674	2.35772	0.234748	10.0436	9.80062e-24	3.56146e-21	FALSE	284.902	240.104	267.47	258.63	1685.64	935.554	2020.34	744.37
ENSDARG00000102632	22581.6	0.675023	0.067275	10.0338	1.08291e-23	3.87899e-21	FALSE	18245.2	16570	17653.7	16765.1	29866.1	25180.2	27465.8	28019.1
ENSDARG00000060051	213.264	1.97462	0.197189	10.0139	1.32458e-23	4.67781e-21	FALSE	80.2093	89.0337	99.3549	107.437	393.69	467.653	386.75	239.828
ENSDARG00000036848	2921.17	1.55159	0.155647	9.96863	2.09084e-23	7.28135e-21	FALSE	1711.64	1618.46	1673.97	1901.15	5365.63	4787.08	6775.21	3318.47
ENSDARG00000090850	4187.34	-1.49244	0.15044	-9.9205	3.39046e-23	1.16455e-20	FALSE	6021.76	6567.13	7805.95	7457.79	2145.81	3517.36	2114.38	2124.35
ENSDARG00000079543	441.988	-1.62336	0.164068	-9.89447	4.39942e-23	1.49069e-20	FALSE	600.409	612.496	833.832	837.483	217.034	300.948	192.719	227.311
ENSDARG00000103006	253.641	2.04015	0.206446	9.88224	4.97102e-23	1.66191e-20	FALSE	95.2889	81.3514	64.5466	72.5613	191.075	399.908	368.879	320.618
ENSDARG00000094300	2087.14	1.17945	0.11957	9.86412	5.95539e-23	1.96481e-20	FALSE	1461.72	1364.79	1545.4	1364.79	3191.21	3096.27	4118.7	2587.72
ENSDARG00000030478	771.493	-1.01004	0.102818	-9.82359	8.91119e-23	2.90181e-20	FALSE	1017.19	1180.65	1141.78	1224.55	521.758	682.44	533.697	532.807
ENSDARG00000100276	108.233	2.82499	0.287631	9.82158	9.09102e-23	2.92241e-20	FALSE	24.4648	44.4248	13.8777	13.3541	151.267	145.194	145.271	168.786
ENSDARG00000003281	1317.27	1.33809	0.136582	9.79695	1.16039e-22	3.68299e-20	FALSE	782.001	795.806	803.309	939.288	1986.63	2044.57	2754.87	1615.93
ENSDARG00000009160	393.932	-1.73444	0.177153	-9.79061	1.23544e-22	3.87217e-20	FALSE	623.753	701.812	710.063	647.743	117.967	253.742	221.052	212.861
ENSDARG00000028173	992.48	1.53093	0.156873	9.75903	1.68756e-22	5.22392e-20	FALSE	605.188	615.272	553.703	610.233	2184.43	1153.68	1866.94	1683.68
ENSDARG00000101190	97.2444	2.93893	0.301569	9.74547	1.92887e-22	5.8981e-20	FALSE	23.3529	33.2424	22.6591	21.6838	223.958	143.793	270.739	135.543
ENSDARG00000100712	675.909	-1.17825	0.12116	-9.72474	2.36498e-22	7.14451e-20	FALSE	1045.73	1091.98	1047.21	930.705	557.273	373.174	460.225	428.797
ENSDARG00000068621	136.202	-9.63033	0.991063	-9.71717	2.54757e-22	7.6045e-20	FALSE	417.645	393.844	407.537	406.676	0	0.8927	0	1.42002
ENSDARG00000042962	574.638	1.05062	0.108527	9.68071	3.6419e-22	1.07432e-19	FALSE	372.231	363.005	403.134	377.289	890.794	724.691	856.784	671.977
ENSDARG00000059826	920.755	0.94783	0.097938	9.67785	3.74505e-22	1.0919e-19	FALSE	687.159	703.456	645.564	669.104	1298.91	1345.27	1471.02	1103.17
ENSDARG00000054300	1089.37	-0.742404	0.0767258	-9.67606	3.81133e-22	1.09845e-19	FALSE	1490.42	1471.54	1604.9	1436.87	820.77	954.383	968.745	845.879
ENSDARG00000092945	278.025	-1.38538	0.144086	-9.61496	6.91345e-22	1.96986e-19	FALSE	420.226	499.453	463.45	471.199	182.634	220.602	164.932	144.646
ENSDARG00000070918	168.331	-3.09851	0.322617	-9.60431	7.66696e-22	2.15064e-19	FALSE	331.991	587.334	363.091	262.109	16.63	66.7961	61.9067	36.0332
ENSDARG00000104174	66.4989	5.27876	0.549664	9.60361	7.71945e-22	2.15064e-19	FALSE	4.3695	1.07394	0	5.41115	61.8139	78.0992	158.67	114.915
ENSDARG00000001913	985.305	-0.967756	0.101031	-9.5788	9.81835e-22	2.70533e-19	FALSE	1156.94	1322.14	1277.08	1347.3	535.38	721.673	649.065	703.789
ENSDARG00000053625	1259.53	-1.33041	0.139636	-9.52773	1.60767e-21	4.3816e-19	FALSE	1908.08	2195.36	2016.33	2064.78	532.906	914.802	910.068	895.25
ENSDARG00000097653	30.2938	-4.61443	0.485036	-9.51358	1.8421e-21	4.96654e-19	FALSE	94.479	75.801	88.8676	81.0014	1.67191	5.52583	6.94016	1.27606
ENSDARG00000059483	1789.42	0.557448	0.0587312	9.49151	2.27713e-21	5.94757e-19	FALSE	1373.79	1433.35	1274.62	1370.05	2020.77	2074.76	1935.41	1988.86
ENSDARG00000104370	191.004	1.73497	0.18278	9.49211	2.26407e-21	5.94757e-19	FALSE	105.369	95.3342	93.0532	94.1856	396.505	242.141	355.53	294.276
ENSDARG00000096577	73.6383	6.33666	0.667614	9.49151	2.2771e-21	5.94757e-19	FALSE	0	1.07362	4.90731	1.80387	301.222	193.648	135.965	47.296
ENSDARG00000099685	1076.15	0.659989	0.0697841	9.45759	3.15125e-21	8.14581e-19	FALSE	790.921	827.311	757.687	789.918	1280.24	1285.49	1161.15	1273.94
ENSDARG00000097770	200.087	10.1278	1.07148	9.45216	3.31906e-21	8.49204e-19	FALSE	0	1.07469	0	0	261.789	329.671	434.672	441.36
ENSDARG00000075833	163.622	2.27256	0.240672	9.44259	3.6368e-21	9.21101e-19	FALSE	52.5986	69.9072	97.3652	58.9705	315.686	266.882	504.842	266.617
ENSDARG00000076448	417.753	-1.85309	0.198045	-9.35688	8.21286e-21	2.05929e-18	FALSE	563.683	673.284	789.868	813.518	122.823	285.358	210.94	168.406
ENSDARG00000056462	127.913	-3.60592	0.385696	-9.34911	8.83921e-21	2.1944e-18	FALSE	192.96	286.326	318.868	386.557	7.40929	47.2763	12.9698	29.4953
ENSDARG00000060113	2300.58	1.22801	0.132265	9.28451	1.62453e-20	3.99349e-18	FALSE	1397.87	1572.59	1576.91	1581.9	4582.3	3092.8	3932.72	2757.85
ENSDARG00000016771	12379	-1.27216	0.137085	-9.2801	1.69322e-20	4.12193e-18	FALSE	17380.3	19372.7	19428.3	21029.8	6899.92	10280.6	8453.9	6335.53
ENSDARG00000058631	256.796	2.17502	0.234441	9.27746	1.7356e-20	4.18447e-18	FALSE	85.4487	106.841	124.338	126.767	664.186	354.098	664.972	330.011
ENSDARG00000098911	160.264	1.57224	0.170092	9.24348	2.38604e-20	5.69786e-18	FALSE	71.7637	66.392	77.3203	62.5305	204.743	243.664	208.016	170.165
ENSDARG00000042811	129.702	-1.53969	0.166827	-9.22927	2.72471e-20	6.44522e-18	FALSE	226.316	191.919	184.353	248.543	81.5473	61.3035	72.4294	77.1036
ENSDARG00000052905	1790.28	-0.885186	0.096222	-9.19941	3.5991e-20	8.43399e-18	FALSE	2081.77	2644.9	2495.23	2248.72	1380.66	1231.16	1324.94	1195
ENSDARG00000102326	1379.15	0.905604	0.098489	9.19498	3.75071e-20	8.7079e-18	FALSE	797.253	878.117	851.836	925.41	1439.2	1685.65	1623.49	1727.88
ENSDARG00000069027	645.777	3.12467	0.340189	9.18509	4.11189e-20	9.45885e-18	FALSE	213.503	162.868	184.864	155.664	1842.94	917.574	2597.04	888.717
ENSDARG00000095002	446.093	-0.988025	0.107795	-9.16574	4.92062e-20	1.12163e-17	FALSE	559.59	591.662	560.259	590.684	284.311	328.829	282.178	267.354
ENSDARG00000038881	2926.38	-0.900796	0.0985026	-9.1449	5.9687e-20	1.34258e-17	FALSE	3680.2	4118.54	3864.12	4066.35	1722.11	2497.23	2025.44	2180.28
ENSDARG00000096527	222.841	-4.15883	0.454796	-9.14439	5.99699e-20	1.34258e-17	FALSE	503.967	634.172	453.686	750.419	18.3386	31.5723	66.6387	14.9791
ENSDARG00000075831	4410.85	0.534668	0.0585766	9.12767	6.99872e-20	1.55297e-17	FALSE	3696.05	3799.77	3616.31	3719.69	5671.01	5268.28	5631.24	4919.68
ENSDARG00000104497	1106.23	0.870531	0.0954991	9.11559	7.82445e-20	1.72097e-17	FALSE	765.311	819.234	729.81	777.534	1485.25	1199.44	1507.43	1459.54
ENSDARG00000077256	6920.45	0.830107	0.0910743	9.11461	7.89517e-20	1.72142e-17	FALSE	5171.25	5416.28	4791.14	5374.21	9554.54	8063.61	10082.4	9192.18
ENSDARG00000038703	429.653	-1.0501	0.115301	-9.10753	8.42755e-20	1.82166e-17	FALSE	646.514	771.746	621.953	597.76	300.137	296.715	361.578	314.5
ENSDARG00000103436	58.4585	3.93432	0.432376	9.09931	9.09096e-20	1.94826e-17	FALSE	8.72608	8.59108	4.89433	5.40376	156.817	104.308	106.977	45.8409
ENSDARG00000037838	2381.35	0.589583	0.0650183	9.06795	1.21275e-19	2.57274e-17	FALSE	1978.74	1876.21	1830.05	2032.18	2978.85	2714.23	3093.22	2825.36
ENSDARG00000045842	1038.28	1.01194	0.111604	9.06721	1.22101e-19	2.57274e-17	FALSE	634.912	760.381	706.502	774.918	1487.01	1513.88	1557.59	1251.05
ENSDARG00000042133	282.349	1.7385	0.191916	9.05864	1.32086e-19	2.75993e-17	FALSE	138.627	106.844	106.622	131.716	529.376	451.962	338.849	292.427
ENSDARG00000057633	185.28	2.80553	0.31012	9.04658	1.47515e-19	3.05684e-17	FALSE	44.7366	66.1498	62.4036	68.7754	584.623	189.779	608.059	318.436
ENSDARG00000039393	344.074	-1.73903	0.192464	-9.03562	1.63071e-19	3.35151e-17	FALSE	576.905	710.361	628.126	661.094	142.932	249.13	172.606	207.009
ENSDARG00000086048	66.7493	2.80673	0.310829	9.02982	1.71961e-19	3.50548e-17	FALSE	16.0393	13.9459	14.7515	12.6378	70.6805	102.783	107.789	116.185
ENSDARG00000055078	255.635	-1.35041	0.150052	-8.99962	2.26497e-19	4.58e-17	FALSE	325.49	360.301	411.823	429.168	117.874	164.873	137.632	178.223
ENSDARG00000035519	14473.7	1.36092	0.151252	8.99772	2.3046e-19	4.62285e-17	FALSE	6427.54	7357.85	10142.9	9051.83	23135.1	15342.4	25345.7	20900.2
ENSDARG00000017127	478.493	1.56665	0.174324	8.98696	2.54167e-19	5.05793e-17	FALSE	264.815	252.316	309.581	282.013	1110.78	673.477	869.276	635.469
ENSDARG00000093124	84.6905	4.30812	0.480104	8.9733	2.87773e-19	5.68159e-17	FALSE	14.6577	13.9172	10.92	6.34835	380.156	240.281	203.451	71.5976
ENSDARG00000093819	39.5373	-9.49479	1.05941	-8.96238	3.17745e-19	6.22433e-17	FALSE	88.4622	116.158	129.098	140.729	0	0	0	0
ENSDARG00000039726	286.286	1.06896	0.119379	8.95434	3.41787e-19	6.64338e-17	FALSE	157.566	168.825	163.281	152.188	308.234	312.228	340.244	382.888
ENSDARG00000060671	229.41	-1.91964	0.214564	-8.9467	3.66256e-19	7.06423e-17	FALSE	442.066	443.537	505.96	469.174	65.6619	156.502	142.339	127.017
ENSDARG00000063229	3803.16	0.977425	0.109665	8.9128	4.97608e-19	9.52445e-17	FALSE	2819.49	2813.82	2829.48	2553.03	6310.17	5048.29	6085.31	4246.64
ENSDARG00000077872	573.51	-2.80224	0.314632	-8.90642	5.27046e-19	1.00115e-16	FALSE	1143.73	1277.65	1469.71	1337.17	112.749	334.761	162.249	140.455
ENSDARG00000058159	1912.14	0.593889	0.0667291	8.9	5.58487e-19	1.04504e-16	FALSE	1487.05	1403.49	1452.15	1372.91	2076.17	2175.29	2325.2	2044.62
ENSDARG00000018263	1026.67	-1.67301	0.187976	-8.90013	5.57819e-19	1.04504e-16	FALSE	1376.88	2200.1	1873.09	1615.98	361.558	653.271	669.973	531.493
ENSDARG00000078172	624.904	1.60661	0.18073	8.8896	6.13291e-19	1.13909e-16	FALSE	381.796	341.222	381.156	368.104	1301.21	962.768	1506.63	714.025
ENSDARG00000100000	413.204	1.98656	0.223993	8.86886	7.38985e-19	1.36245e-16	FALSE	106.569	124.381	183.31	104.824	439.13	636.254	346.776	639.395
ENSDARG00000035559	1518.59	0.806372	0.0910272	8.85859	8.10338e-19	1.4831e-16	FALSE	1127.44	1091.1	1030.77	1143.29	1843.95	1954.74	2147.14	1738.64
ENSDARG00000020994	162.652	-2.11606	0.239007	-8.85355	8.4781e-19	1.54043e-16	FALSE	257.934	364.827	346.781	393.371	108.926	97.1399	52.5463	57.7513
ENSDARG00000100374	3909.76	-0.532503	0.0602279	-8.84146	9.4474e-19	1.7042e-16	FALSE	4500.91	4951.81	4848.09	4627.49	3175.64	3522.45	3096.17	3295.52
ENSDARG00000020890	6571.95	0.64366	0.0733528	8.77486	1.71115e-18	3.06466e-16	FALSE	5023.84	5019.95	4688.98	4926.06	7531.21	8668.22	7755.85	6758.56
ENSDARG00000076221	320.453	1.59769	0.182416	8.7585	1.97868e-18	3.51868e-16	FALSE	204.657	123.953	155.21	153.973	430.679	564.51	532.525	393.363
ENSDARG00000041685	289.889	-2.62707	0.301407	-8.71602	2.88156e-18	5.08818e-16	FALSE	474.23	560.403	746.298	705.623	49.99	195.876	87.0085	70.6038
ENSDARG00000086746	1800.27	1.23538	0.141791	8.71265	2.96841e-18	5.20489e-16	FALSE	1064.39	1142.67	1247.56	1397.95	2967.73	3197.02	3309.78	1962.4
ENSDARG00000027082	141.951	1.60825	0.184834	8.70104	3.28846e-18	5.72604e-16	FALSE	78.8412	67.5484	60.1302	57.8397	202.387	230.874	180.172	185.658
ENSDARG00000013926	1115.68	3.09604	0.356	8.69672	3.41609e-18	5.90725e-16	FALSE	294.375	331.054	289.444	337.23	3813.08	2507.94	3439.81	948.514
ENSDARG00000015164	8711.2	1.41158	0.162435	8.69011	3.62094e-18	6.21859e-16	FALSE	5138.04	5308.04	5617.9	6039.6	17483	13666.2	18574.7	9084.92
ENSDARG00000103503	726.544	-1.01513	0.116947	-8.68024	3.94939e-18	6.73653e-16	FALSE	910.688	981.856	1046.04	1030.25	400.35	614.715	462.061	488.312
ENSDARG00000097670	89.4089	3.91232	0.45118	8.67131	4.27188e-18	7.23737e-16	FALSE	12.082	8.60427	6.44735	2.93339	33.2473	125.005	165.425	107.887
ENSDARG00000007988	104.701	-1.81638	0.20969	-8.66224	4.62589e-18	7.78454e-16	FALSE	170.282	189.282	159.991	194.622	39.195	66.1727	57.8683	40.408
ENSDARG00000102728	96.8895	3.70421	0.427924	8.65624	4.87591e-18	8.15057e-16	FALSE	8.62646	11.8842	6.23096	17.7001	72.0771	277.631	144.936	85.3208
ENSDARG00000102572	1867.43	1.02517	0.118905	8.62176	6.59319e-18	1.09482e-15	FALSE	1409.99	1256.25	1425.08	1504.02	2726.62	3065.29	3282.18	2317.56
ENSDARG00000030157	630.098	-1.25649	0.14592	-8.61083	7.25308e-18	1.19647e-15	FALSE	758.602	862.586	857.291	825.209	293.433	476.132	309.077	306.04
ENSDARG00000042780	1406.45	-1.36479	0.158717	-8.59889	8.04892e-18	1.31908e-15	FALSE	2200.9	2180.95	2520.48	2431.11	665.036	1194.57	1045.68	720.708
ENSDARG00000040190	1779.8	-0.877574	0.102347	-8.57447	9.95403e-18	1.6207e-15	FALSE	2276.67	2366.58	2860.66	2688.12	1163.58	1599.44	1433.18	1354.58
ENSDARG00000104007	218.082	1.71259	0.200205	8.55417	1.18724e-17	1.92057e-15	FALSE	88.7537	121.328	62.6962	86.4936	311.757	292.375	219.361	350.796
ENSDARG00000090946	58.1211	-2.18187	0.255339	-8.54502	1.2851e-17	2.06556e-15	FALSE	96.2003	124.95	138.133	137.341	30.5847	21.6415	35.7974	21.9611
ENSDARG00000097208	708.079	1.52564	0.178575	8.5434	1.3033e-17	2.08146e-15	FALSE	440.119	442.74	384.01	431.765	1765.18	1032.42	1259.53	833.851
ENSDARG00000045089	224.174	-1.82295	0.213753	-8.52833	1.48471e-17	2.34137e-15	FALSE	377.189	414.528	456.386	496.245	126.528	132.385	135.327	100.098
ENSDARG00000010758	212.58	-2.54515	0.298428	-8.5285	1.48262e-17	2.34137e-15	FALSE	345.358	462.478	438.117	393.359	46.1209	32.7028	73.3844	126.757
ENSDARG00000098162	809.67	-1.04927	0.123112	-8.52288	1.55635e-17	2.439e-15	FALSE	1159.35	1394.17	1314.2	1064.97	680.424	539.754	542.982	620.538
ENSDARG00000037859	65.5051	4.21748	0.496127	8.50081	1.88279e-17	2.93224e-15	FALSE	7.29235	5.3633	17.7094	7.22315	343.637	134.415	165.746	63.6993
ENSDARG00000003127	2927.96	0.623752	0.0734617	8.49085	2.05134e-17	3.15554e-15	FALSE	2302.16	2281.89	2544.44	2426.37	3947.11	3716.07	3736.9	3332.1
ENSDARG00000054343	132.09	1.60322	0.188804	8.49142	2.04128e-17	3.15554e-15	FALSE	71.4883	57.916	65.957	76.7682	258.27	181.337	221.875	167.064
ENSDARG00000035253	914.713	1.02408	0.120646	8.48825	2.09763e-17	3.20708e-15	FALSE	676.357	640.525	680.763	698.882	1381.36	1102.31	1711.63	1289.3
ENSDARG00000008637	1496.53	-0.927447	0.109617	-8.4608	2.65551e-17	4.03541e-15	FALSE	1983.63	2360.31	2297.88	2157.81	890.839	1288.4	1286.68	1159.79
ENSDARG00000040251	773.987	1.2639	0.150023	8.42474	3.61567e-17	5.46141e-15	FALSE	488.095	454.442	469.002	399.781	1248.43	796.476	1353.13	947.647
ENSDARG00000101189	93.8873	3.26653	0.387811	8.423	3.66978e-17	5.50994e-15	FALSE	14.5389	17.1843	3.91324	19.8082	65.6541	92.7794	189.496	184.172
ENSDARG00000102808	2633.55	-0.821002	0.0975036	-8.42022	3.7577e-17	5.60836e-15	FALSE	3374.51	3774.87	3252.93	3124.6	1677.81	1867.86	1811.5	2294.19
ENSDARG00000092077	62.4499	-3.02085	0.359194	-8.41007	4.0976e-17	6.07948e-15	FALSE	148.962	177.391	107.689	142.814	25.7349	14.0263	21.6205	10.3602
ENSDARG00000099351	1834.23	1.74816	0.207982	8.40532	4.2669e-17	6.29343e-15	FALSE	772.527	1096.6	1123.31	1022.33	4673.06	2629.51	4024.86	2169.33
ENSDARG00000057113	828.33	3.64169	0.433425	8.40213	4.38471e-17	6.42936e-15	FALSE	150.489	270.184	102.075	126.602	3311.23	1521.55	2439.69	801.493
ENSDARG00000036967	2999.73	0.878638	0.104631	8.3975	4.5609e-17	6.64884e-15	FALSE	2300.79	2329.84	2506.99	2205.19	4885.13	4094.23	4812.88	3387.93
ENSDARG00000080675	790.402	-1.13753	0.135499	-8.39512	4.65404e-17	6.7454e-15	FALSE	1123.89	1217.4	1065.69	1020.11	424.26	442.187	465.837	675.368
ENSDARG00000035835	3987.36	0.778079	0.0927325	8.39058	4.83762e-17	6.97117e-15	FALSE	3228.59	3148.85	3082.73	3048.65	6057.62	4674.51	5992.92	4724.31
ENSDARG00000097054	92.8636	4.26823	0.509064	8.38447	5.09536e-17	7.30063e-15	FALSE	1.47095	7.48252	14.9893	6.36922	182.6	281.991	62.3079	77.279
ENSDARG00000042613	543.985	-1.73019	0.206546	-8.37678	5.4396e-17	7.74958e-15	FALSE	1035.63	806.915	870.332	1087.28	147.341	351.879	288.339	355.946
ENSDARG00000045834	127	-2.58087	0.308658	-8.36158	6.18856e-17	8.76677e-15	FALSE	168.93	283.144	323.176	376.68	23.225	79.6632	41.9812	47.7098
ENSDARG00000044753	2780.36	-0.441124	0.0527752	-8.35853	6.35019e-17	8.94521e-15	FALSE	3272.41	3395.73	3206.37	3255.99	2437.76	2523.13	2325.65	2386.09
ENSDARG00000019365	270.998	-1.48165	0.177419	-8.35112	6.76172e-17	9.47169e-15	FALSE	361.225	465.067	410.193	415.848	201.27	100.24	137.227	153.742
ENSDARG00000013928	844.127	0.731347	0.0876185	8.34695	7.00497e-17	9.70402e-15	FALSE	623.596	669.613	663.882	666.642	1201	1042.95	1160.62	959.438
ENSDARG00000032242	529.065	1.65977	0.198847	8.34698	7.00289e-17	9.70402e-15	FALSE	357.645	283.08	293.661	231.324	1216.16	560.619	1082	815.385
ENSDARG00000014849	54.5481	3.42357	0.410374	8.34256	7.26974e-17	1.00155e-14	FALSE	2.92876	8.56715	14.8659	11.7798	165.356	67.5963	74.1656	117.936
ENSDARG00000089296	1079.51	1.03998	0.124851	8.32979	8.09841e-17	1.10961e-14	FALSE	648.129	804.615	594.426	748.729	1309.72	1280.25	1805.44	1357.16
ENSDARG00000077745	61.8482	4.88174	0.587175	8.31394	9.25736e-17	1.26152e-14	FALSE	0	9.59696	2.68309	2.56034	151.098	58.2519	132.859	87.8461
ENSDARG00000092976	836.141	-1.26178	0.151836	-8.31014	9.55869e-17	1.29554e-14	FALSE	1254.98	1296.23	1453.36	1451.68	365.557	658.818	675.426	575.697
ENSDARG00000038281	1608.95	0.635135	0.0764559	8.30721	9.79806e-17	1.32084e-14	FALSE	1227.54	1356.71	1326.39	1262.28	2176.53	1967.04	2109.63	1789.36
ENSDARG00000075622	238.131	-1.78302	0.214701	-8.3047	1.00069e-16	1.34178e-14	FALSE	299.135	389.591	423.219	385.567	127.075	55.0658	123.853	128.961
ENSDARG00000031317	12911.2	1.96153	0.236553	8.29213	1.1124e-16	1.48363e-14	FALSE	6578.8	5830.47	6666.28	6103.92	36693	18134.8	27753.7	15486.5
ENSDARG00000098700	73.9171	3.86743	0.467058	8.28041	1.22748e-16	1.62846e-14	FALSE	14.6002	13.9386	5.91444	14.4599	344.844	182.975	124.038	58.3924
ENSDARG00000071235	1230.05	1.27684	0.154275	8.27638	1.26972e-16	1.67563e-14	FALSE	837.057	792.173	771.339	831.898	2617.43	1856.92	2039.11	1320.98
ENSDARG00000062501	649.312	-0.899714	0.108928	-8.25969	1.46045e-16	1.91724e-14	FALSE	878.306	914.39	1044.36	944.231	494.437	494.849	535.515	503.497
ENSDARG00000069135	2324.59	1.16075	0.140665	8.25192	1.55874e-16	2.03562e-14	FALSE	1616.31	1488.71	1640.1	1610.01	3973.42	3083.44	4573.44	2580.35
ENSDARG00000038025	1567.35	2.89506	0.350966	8.24882	1.59963e-16	2.07819e-14	FALSE	463.987	468.673	477.528	576.259	5630.22	2900.85	4820.43	1429.28
ENSDARG00000088444	123.384	4.94804	0.600081	8.24562	1.64312e-16	2.12369e-14	FALSE	4.38843	8.57173	8.90178	2.71585	214.434	217.599	48.8633	280.195
ENSDARG00000007275	19485	0.715691	0.0868693	8.23871	1.74075e-16	2.23833e-14	FALSE	14819.8	14788.2	15543.6	15799.5	26151.4	27954.5	25412.3	20589.3
ENSDARG00000011665	20092.7	-0.689481	0.0837416	-8.23343	1.81926e-16	2.32736e-14	FALSE	24609.5	25626.9	26389.2	26030.5	13528.1	17673.2	15426.3	17028.6
ENSDARG00000076381	387.632	-1.53379	0.18634	-8.23113	1.85462e-16	2.36055e-14	FALSE	513.989	746.418	740.299	656.034	139.764	279.916	262.294	235.875
ENSDARG00000100697	4919.06	1.06614	0.129566	8.22855	1.89497e-16	2.39972e-14	FALSE	3503.3	3572.9	3192.35	4058.59	7933.59	8092.28	8418.15	5560.45
ENSDARG00000074191	246.444	-2.36772	0.288038	-8.22014	2.03265e-16	2.56113e-14	FALSE	351.412	441.515	603.18	575.341	51.3596	176.451	64.0375	90.5538
ENSDARG00000074613	159.876	-2.41489	0.293888	-8.21705	2.08578e-16	2.61494e-14	FALSE	234.876	367.027	341.257	407.787	53.4927	100.896	34.1457	65.1928
ENSDARG00000101352	31.1424	4.624	0.56342	8.20702	2.2674e-16	2.8285e-14	FALSE	1.45642	2.14654	3.92548	1.80353	59.839	51.9985	74.304	50.2795
ENSDARG00000095522	26.4077	-8.90627	1.08623	-8.19925	2.41894e-16	3.0026e-14	FALSE	72.7177	113.588	73.9003	56.6872	0	0	0	0
ENSDARG00000077882	174.578	1.9961	0.243922	8.18334	2.76073e-16	3.40998e-14	FALSE	75.6289	81.614	114.535	93.6684	479.282	275.234	480.483	229.947
ENSDARG00000010008	4133.74	0.870897	0.106486	8.17854	2.87303e-16	3.53129e-14	FALSE	2978.43	3136.18	3403.74	3063.69	6670.91	4621.35	6488	5235.13
ENSDARG00000018351	1269.66	-1.40331	0.171742	-8.17103	3.05758e-16	3.73979e-14	FALSE	1606.51	1845.02	2379.9	2452.53	525.716	938.227	764.971	903.315
ENSDARG00000099970	213965	1.25076	0.153288	8.15953	3.36334e-16	4.09381e-14	FALSE	139438	126787	133832	145398	438475	286056	357759	215713
ENSDARG00000043102	845.645	1.53267	0.187945	8.15488	3.49518e-16	4.23373e-14	FALSE	525.425	465.722	571.791	540.368	1650.71	1293.5	2172.94	970.815
ENSDARG00000090107	154.368	1.9265	0.236688	8.13942	3.97181e-16	4.78794e-14	FALSE	51.0203	34.3322	53.0792	25.2695	105.021	172.044	166.68	170.2
ENSDARG00000076487	335.75	-2.11331	0.259881	-8.13181	4.22928e-16	5.07392e-14	FALSE	639.976	709.11	682.291	696.59	78.989	220.967	217.532	112.669
ENSDARG00000104613	4176.01	0.732964	0.0902008	8.12592	4.43998e-16	5.30134e-14	FALSE	2800.43	2591.4	3122.96	3536.7	4881.36	4769.71	5222.98	5167.39
ENSDARG00000039272	613.896	-0.926102	0.11408	-8.118	4.73926e-16	5.63185e-14	FALSE	787.9	953.126	923.422	855.774	384.509	516.147	510.192	443.497
ENSDARG00000054319	906.837	-1.42284	0.175495	-8.10755	5.16502e-16	6.10886e-14	FALSE	1204.13	1373.67	1589.07	1545.87	361.474	752.524	581.322	437.334
ENSDARG00000006865	364.423	-1.05404	0.130304	-8.08908	6.01152e-16	7.07667e-14	FALSE	643.964	456.251	540.412	517.838	279.464	246.954	219.385	290.504
ENSDARG00000008491	1091.41	-0.769141	0.0950967	-8.08798	6.06601e-16	7.10744e-14	FALSE	1497.11	1573.36	1697.99	1607.62	827.445	1063.44	1014.61	839.978
ENSDARG00000099889	1118.33	1.48309	0.183401	8.0866	6.13531e-16	7.1552e-14	FALSE	624.197	706.488	782.748	723.494	2239.18	1812.08	2691.23	1195.09
ENSDARG00000101450	89.9072	-2.42449	0.300911	-8.05717	7.8078e-16	9.06356e-14	FALSE	200.757	238.657	163.759	169.814	55.0939	21.5554	19.688	51.4727
ENSDARG00000097066	47.9019	5.90231	0.732932	8.053	8.07867e-16	9.33477e-14	FALSE	1.47988	0	0	4.60192	73.495	67.4153	156.946	83.1125
ENSDARG00000104702	2209.05	-0.739218	0.0918473	-8.04834	8.3926e-16	9.65303e-14	FALSE	2699.11	2694.73	3193.47	2903.21	1503.97	1988.23	1658.47	1735.2
ENSDARG00000053405	317.27	-1.30257	0.161907	-8.04518	8.61169e-16	9.85979e-14	FALSE	421.987	463.946	541.889	567.753	151.274	244.632	182.512	231.153
ENSDARG00000037618	1060.46	1.08869	0.135336	8.04436	8.66972e-16	9.88112e-14	FALSE	730.362	699.013	848.591	599.527	1517.09	1539.57	1816.15	1246.78
ENSDARG00000002968	389.779	-1.54239	0.191801	-8.04159	8.86786e-16	1.00612e-13	FALSE	596.088	740.349	715.326	708.322	137.394	225.963	312.547	270.725
ENSDARG00000090297	262.405	1.72208	0.214465	8.02966	9.77452e-16	1.10399e-13	FALSE	153.303	127.591	152.792	152.734	747.657	361.154	457.218	369.816
ENSDARG00000060797	1552.94	-1.21643	0.151667	-8.02038	1.05423e-15	1.18536e-13	FALSE	2389.58	2383.31	2314.92	2215.61	684.902	903.364	1370.79	1042.66
ENSDARG00000094836	1921.57	0.737243	0.0919749	8.01569	1.09518e-15	1.22592e-13	FALSE	1483.99	1493.92	1506.62	1569.01	2827.51	2230.94	2808.15	2229.91
ENSDARG00000026811	326.308	-0.9073	0.11322	-8.01359	1.11404e-15	1.24149e-13	FALSE	397.371	448.732	420.569	472.282	241.231	237.171	192.141	257.548
ENSDARG00000098408	181.682	-1.54596	0.193128	-8.00482	1.19642e-15	1.32739e-13	FALSE	243.34	294.018	308.419	307.635	64.7632	140.446	91.5058	99.011
ENSDARG00000002293	84.2746	8.38411	1.05005	7.98451	1.41086e-15	1.55841e-13	FALSE	0	0	0	0.906585	82.7544	129.192	77.9724	148.301
ENSDARG00000030765	1961.91	-0.659296	0.0826104	-7.98079	1.45404e-15	1.59906e-13	FALSE	2434.43	2483.11	2410.67	2421.04	1291.95	1699.15	1544.64	1634.6
ENSDARG00000103760	440.412	-1.23623	0.155186	-7.96614	1.63712e-15	1.79254e-13	FALSE	654.638	670.502	788.585	828.614	329.824	288.231	393.124	240.636
ENSDARG00000028625	7261.61	0.857748	0.107701	7.96419	1.6631e-15	1.79744e-13	FALSE	5684.26	5381.43	5502.29	5750.44	11516.4	9723.29	11478.3	7731.23
ENSDARG00000099776	17294.7	1.13594	0.142628	7.96439	1.6604e-15	1.79744e-13	FALSE	11382.8	11508.1	11975.7	13154.5	32679.8	26786.3	28872.2	17201.6
ENSDARG00000069282	363.768	1.39094	0.174643	7.96447	1.65927e-15	1.79744e-13	FALSE	253.25	181.431	194.082	237.026	643.253	411.741	733.236	478.34
ENSDARG00000044212	4197.14	-1.19143	0.149653	-7.96126	1.70299e-15	1.83265e-13	FALSE	6213.25	6715.43	6655.75	7125.27	2903.57	3387.06	3356.79	2051.29
ENSDARG00000006598	819.244	1.73514	0.218181	7.95277	1.82385e-15	1.95433e-13	FALSE	477.648	517.131	384.23	501.152	1896.65	1399.26	2167.24	797.845
ENSDARG00000013371	367.528	-0.768314	0.0966574	-7.94884	1.88268e-15	2.00877e-13	FALSE	492.396	474.62	503.954	498.273	281.509	303.979	317.183	255.798
ENSDARG00000006811	590.448	-1.39898	0.176134	-7.94275	1.97752e-15	2.10103e-13	FALSE	762.979	973.115	1093.4	1149.79	247.75	495.088	401.838	365.676
ENSDARG00000043729	1974.63	-1.38031	0.173981	-7.93369	2.12734e-15	2.24161e-13	FALSE	2771.52	3688.91	3907.58	3683.9	1342.16	1894.07	1286.77	878.576
ENSDARG00000096603	87.3969	2.50421	0.315664	7.93315	2.13664e-15	2.24161e-13	FALSE	36.9432	41.2993	20.3828	27.2239	257.504	199.405	156.705	93.119
ENSDARG00000098037	141.393	4.24308	0.534855	7.93314	2.13666e-15	2.24161e-13	FALSE	7.32041	13.9228	20.8046	11.7777	401.53	405.749	111.256	112.733
ENSDARG00000014805	370.307	-1.38671	0.174817	-7.93237	2.14996e-15	2.24617e-13	FALSE	564.369	617.848	542.894	424.486	133.972	258.822	218.955	209.004
ENSDARG00000014624	30.315	-4.91752	0.621338	-7.9144	2.48439e-15	2.5848e-13	FALSE	35.0289	61.1112	130.055	122.871	4.91104	2.87468	0.905315	2.99462
ENSDARG00000042816	906.946	4.96761	0.627718	7.91376	2.49739e-15	2.58759e-13	FALSE	104.875	80.4624	66.7618	73.951	5897.46	1970.99	1993.4	329.237
ENSDARG00000011521	391.531	-1.38723	0.175504	-7.90423	2.69586e-15	2.78172e-13	FALSE	478.849	606.175	789.831	723.298	203.417	339.304	236.138	216.865
ENSDARG00000026611	1600.96	3.04065	0.384914	7.89956	2.79886e-15	2.87618e-13	FALSE	470.848	468.401	459.293	463.736	7230.21	2487.85	4105.29	1501.28
ENSDARG00000001953	1723.12	2.381	0.301582	7.89505	2.90202e-15	2.95794e-13	FALSE	613.574	796.591	610.74	819.799	4735.84	3416.76	4963.72	1686.31
ENSDARG00000095512	52.1394	-3.35659	0.425136	-7.89533	2.89547e-15	2.95794e-13	FALSE	105.255	67.7255	120.219	137.725	6.97496	24.8177	4.02675	6.66952
ENSDARG00000098747	357.29	-1.0455	0.132494	-7.89089	3.00032e-15	3.04575e-13	FALSE	385.543	513.241	436.861	445.956	206.849	245.128	206.675	206.585
ENSDARG00000053620	70.3132	-2.98902	0.378925	-7.88814	3.06719e-15	3.10108e-13	FALSE	118.987	124.064	161.466	173.553	5.91692	37.8359	8.13127	20.8356
ENSDARG00000019417	1042.39	1.33199	0.168943	7.88429	3.16327e-15	3.18537e-13	FALSE	643.483	644.969	702.181	584.165	2254.3	1423.09	1723.33	1083.54
ENSDARG00000094426	823.739	0.764984	0.0970449	7.88278	3.20165e-15	3.19833e-13	FALSE	629.331	595.134	607.643	590.586	1142.69	1114.96	902.793	956.16
ENSDARG00000092870	1461.18	1.37308	0.174179	7.88318	3.19161e-15	3.19833e-13	FALSE	856.708	861.78	826.068	727.457	3001.11	2188.99	1403.2	1880.61
ENSDARG00000039265	284.869	1.41353	0.179608	7.87008	3.54416e-15	3.52644e-13	FALSE	110.165	133.797	163.172	127.608	269.25	299.864	408.412	450.719
ENSDARG00000002507	452.913	0.746981	0.0949668	7.86571	3.67014e-15	3.63735e-13	FALSE	308.346	339.337	299.575	299.93	536.143	479.929	565.692	510.223
ENSDARG00000102473	269.433	1.21231	0.15437	7.85329	4.05263e-15	4.00062e-13	FALSE	174.545	160	165.468	136.912	347.966	361.113	471.402	291.54
ENSDARG00000037843	60.4404	8.75621	1.11657	7.84207	4.43196e-15	4.35792e-13	FALSE	0	0	0	0	160.574	87.3277	20.873	75.7716
ENSDARG00000019713	440.7	-1.01382	0.129391	-7.8353	4.6774e-15	4.5813e-13	FALSE	606.334	522.365	521.152	624.46	240.007	332.409	255.606	298.113
ENSDARG00000061383	834.434	-1.09454	0.139933	-7.8219	5.20319e-15	5.07645e-13	FALSE	1179.48	1225.4	1309.04	1454.73	600.124	702.571	684.15	437.678
ENSDARG00000016830	7289.23	0.859509	0.109941	7.8179	5.37108e-15	5.21994e-13	FALSE	5358.35	5317.6	5397.45	5547.08	12510.1	8615.4	9898.88	8208.69
ENSDARG00000090623	658.274	0.63817	0.0816345	7.8174	5.39243e-15	5.22045e-13	FALSE	549.547	546.686	471.512	494.288	809.387	753.896	847.756	789.341
ENSDARG00000098256	61.0227	3.28885	0.420745	7.81672	5.42155e-15	5.22846e-13	FALSE	8.75786	7.50617	20.6909	16.2637	219.054	84.3481	157.551	69.6395
ENSDARG00000020647	813.475	0.586865	0.0751935	7.80473	5.96277e-15	5.72837e-13	FALSE	619.686	610.368	628.373	668.628	978.092	950.274	998.754	875.717
ENSDARG00000067851	183.358	-1.34646	0.172715	-7.79588	6.39595e-15	6.12107e-13	FALSE	259.636	304.992	298.234	328.516	84.7349	160.332	116.606	108.051
ENSDARG00000039385	1313.67	0.936815	0.120257	7.79012	6.6947e-15	6.38262e-13	FALSE	1112.73	952.688	967.602	906.068	2260.33	1683.03	1522.4	2069.84
ENSDARG00000092071	220.79	-1.55211	0.199693	-7.77248	7.6966e-15	7.31002e-13	FALSE	292.714	315.525	397.244	358.651	77.3828	165.968	111.652	110.465
ENSDARG00000067520	333.194	-1.11469	0.14345	-7.77053	7.81599e-15	7.3954e-13	FALSE	566.285	449.316	529.001	498.709	268.153	231.047	221.847	222.419
ENSDARG00000009779	2031.73	0.963491	0.124059	7.7664	8.07459e-15	7.58286e-13	FALSE	1589.16	1538.26	1574.69	1520.42	3405.01	2873.87	3616.94	2240.15
ENSDARG00000103298	173.645	-1.38956	0.178914	-7.76664	8.05956e-15	7.58286e-13	FALSE	244.399	310.639	300.942	348.67	81.6626	140.135	129.365	109.792
ENSDARG00000017720	151.305	2.00133	0.257768	7.76407	8.22469e-15	7.695e-13	FALSE	69.4705	79.9904	76.0681	63.6246	462.066	248.79	279.144	169.281
ENSDARG00000099985	313.7	1.05579	0.136244	7.74928	9.24135e-15	8.57564e-13	FALSE	190.617	206.143	264.537	222.556	531.385	441.866	442.336	430.387
ENSDARG00000086553	1371.03	1.0838	0.139864	7.74891	9.26856e-15	8.57564e-13	FALSE	847.21	965.065	885.378	944.63	2017.22	1924.04	2398.07	1386.75
ENSDARG00000104995	169.53	-1.48455	0.191573	-7.74927	9.24228e-15	8.57564e-13	FALSE	291.525	273.193	343.688	243.09	67.3876	130.017	105.815	108.046
ENSDARG00000041787	420.097	-0.869679	0.112539	-7.72782	1.09405e-14	1.00854e-12	FALSE	604.657	625.458	616.195	709.368	329.684	383.855	348.243	338.952
ENSDARG00000062077	86.8673	-3.05213	0.395213	-7.72275	1.13848e-14	1.04565e-12	FALSE	156.121	187.684	195.932	188.774	4.91034	49.8829	20.8285	12.7347
ENSDARG00000063330	4284.56	2.4906	0.322843	7.7146	1.21362e-14	1.11059e-12	FALSE	1150.34	1257.98	1176.29	1264.63	8361.36	8464.74	2958.28	7470.27
ENSDARG00000076557	214.612	1.72346	0.223887	7.69791	1.3831e-14	1.26108e-12	FALSE	142.727	116.964	107.96	101.04	612.086	278.222	324.341	327.14
ENSDARG00000014311	145.993	-1.26982	0.165093	-7.6915	1.45423e-14	1.32113e-12	FALSE	244.911	227.446	269.355	220.217	119.748	98.0245	96.0205	86.22
ENSDARG00000044441	865.515	-0.80223	0.104311	-7.69077	1.46256e-14	1.32391e-12	FALSE	1120.75	1309.32	1311.5	1238.72	642.753	689.333	858.676	667.645
ENSDARG00000103249	76.4406	-2.60506	0.338982	-7.68496	1.53044e-14	1.38037e-12	FALSE	126.518	215.857	172.257	218.838	47.0428	31.8768	26.2916	16.534
ENSDARG00000105212	87.7563	-2.146	0.279843	-7.66861	1.73873e-14	1.56261e-12	FALSE	217.318	147.31	174.631	170.19	39.2338	40.8491	60.8456	20.0011
ENSDARG00000086842	1428.87	0.990353	0.129303	7.65919	1.87113e-14	1.66963e-12	FALSE	1118.58	1009.45	919.407	1111.24	2452.18	1858.16	2378.55	1573.07
ENSDARG00000101956	17.9865	-8.32399	1.08674	-7.65961	1.865e-14	1.66963e-12	FALSE	56.7451	46.9026	53.1192	54.9284	0	0	0	0
ENSDARG00000010658	798.223	1.19588	0.156218	7.6552	1.93012e-14	1.71616e-12	FALSE	543.391	633.232	596.254	438.189	1348.93	1030.5	1640.28	1044.44
ENSDARG00000039069	92.1892	-1.88246	0.246106	-7.64897	2.02599e-14	1.79504e-12	FALSE	213.618	121.353	144.808	188.007	60.9717	42.2947	31.2467	45.8865
ENSDARG00000057128	1526.4	-0.665035	0.0871679	-7.62935	2.35943e-14	2.08311e-12	FALSE	1696.71	1901.31	1929.79	1781.65	1138.13	1303.53	1043.41	1128.58
ENSDARG00000013763	1515.24	-0.518856	0.0680707	-7.62231	2.49168e-14	2.19215e-12	FALSE	1719.74	1930.46	1915.77	1813.03	1299.83	1222.98	1349.6	1280.51
ENSDARG00000029822	420.624	-2.77039	0.36519	-7.58615	3.29555e-14	2.87918e-12	FALSE	676.077	1079.65	974.136	703.194	86.4635	237.517	77.8597	101.8
ENSDARG00000059363	518.748	2.99536	0.394825	7.58653	3.28575e-14	2.87918e-12	FALSE	146.927	159.992	156.691	162.15	2069.33	876.482	1610.86	435.754
ENSDARG00000090914	1459.77	0.911841	0.120215	7.58507	3.32317e-14	2.89323e-12	FALSE	1087.84	942.873	1060.1	1173.51	2393.4	1771.32	2179.43	1682.6
ENSDARG00000087017	287.321	-2.14444	0.283122	-7.57425	3.61202e-14	3.13383e-12	FALSE	495.014	640.655	516.235	473.384	129.181	108.792	44.2712	197.206
ENSDARG00000096217	17.4262	-4.6943	0.619873	-7.57301	3.64674e-14	3.15305e-12	FALSE	55.3084	48.3096	45.091	36.9513	1.96116	1.92846	1.81269	1.50183
ENSDARG00000104721	72.5817	-1.67299	0.221109	-7.56636	3.83832e-14	3.30728e-12	FALSE	135.871	152.887	137.384	128.939	44.6373	33.8482	48.3279	46.8602
ENSDARG00000099276	471.319	-1.62853	0.215362	-7.56185	3.97376e-14	3.41226e-12	FALSE	746.781	864.703	927.667	776.534	139.708	360.337	306.15	267.689
ENSDARG00000098800	147.001	-1.51215	0.200152	-7.55502	4.188e-14	3.58395e-12	FALSE	193.301	294.41	211.28	356.875	92.1185	93.4459	87.6453	98.1554
ENSDARG00000019838	852.633	-0.869365	0.115121	-7.55174	4.29482e-14	3.66287e-12	FALSE	1148.92	1271.75	1211.68	1089.29	599.513	541.446	785.491	656.71
ENSDARG00000005085	1233.63	1.29007	0.17112	7.539	4.73575e-14	4.02523e-12	FALSE	875.529	714.954	937.199	737.279	2705.13	1756.45	2170.83	1352.09
ENSDARG00000055592	674.943	-1.20202	0.159531	-7.53472	4.89392e-14	4.14561e-12	FALSE	994.197	1022.44	895.515	932.292	447.576	260.452	534.459	427.363
ENSDARG00000103001	626.624	0.94963	0.126058	7.53327	4.94847e-14	4.17771e-12	FALSE	417.164	384.782	453.027	461.232	858.364	799.199	997.376	665.376
ENSDARG00000073704	1383.54	0.537721	0.0714103	7.53002	5.07332e-14	4.26874e-12	FALSE	1245.29	1194.32	1170.97	1142.42	1726.47	1581.53	1836.7	1745.39
ENSDARG00000007366	167.172	-1.82761	0.242917	-7.5236	5.32885e-14	4.46875e-12	FALSE	274.457	253.049	271.031	321.705	33.4017	114.982	81.4874	85.3511
ENSDARG00000036237	1244.98	-1.00831	0.134408	-7.50186	6.29192e-14	5.25878e-12	FALSE	2023.18	1918.83	2029.87	1876.23	769.61	979.819	1208.74	942.557
ENSDARG00000076667	24860.3	1.34576	0.179494	7.49752	6.50359e-14	5.41764e-12	FALSE	15948.3	15334.7	15803.1	15352	60394.3	35538	38008.9	24756
ENSDARG00000094045	395.876	-1.59548	0.212993	-7.49075	6.8482e-14	5.68582e-12	FALSE	582.694	610.234	460.146	787.827	163.36	302.809	132.394	209.401
ENSDARG00000018846	376.204	-1.65923	0.221905	-7.4772	7.59205e-14	6.28261e-12	FALSE	602.065	719.892	786.418	751.796	108.95	296.005	263.605	236.921
ENSDARG00000101164	104.246	-2.41645	0.323477	-7.47025	8.00404e-14	6.60175e-12	FALSE	202.857	203.752	181.238	195.136	21.6085	18.2178	40.7482	64.4082
ENSDARG00000039516	314.566	-1.10954	0.148572	-7.46799	8.1431e-14	6.69443e-12	FALSE	422.752	480.32	546.278	468.015	197.13	254.102	266.805	173.284
ENSDARG00000043416	776.986	0.82901	0.111134	7.45955	8.68167e-14	7.11386e-12	FALSE	564.487	599.642	593.658	631.865	1165.92	1041.02	1181.26	863.998
ENSDARG00000056008	7204.94	-0.564345	0.0756758	-7.4574	8.82436e-14	7.20723e-12	FALSE	9185.16	9352.19	8471.08	8620.69	5825.08	6767.76	5401.55	6097.63
ENSDARG00000030463	619.058	-0.673996	0.090425	-7.45364	9.07971e-14	7.39171e-12	FALSE	658.187	757.491	765.432	733.198	432.76	410.4	482.274	501.441
ENSDARG00000070604	110.3	-2.12571	0.285453	-7.44679	9.56411e-14	7.76086e-12	FALSE	265.222	98.7177	264.263	277.887	52.0099	40.3944	57.076	57.7511
ENSDARG00000057253	53.7884	3.38933	0.455228	7.44535	9.66849e-14	7.82025e-12	FALSE	20.491	5.35557	2.97049	9.05735	108.236	70.5259	122.123	76.1733
ENSDARG00000086647	227.755	1.941	0.260807	7.4423	9.89471e-14	7.97749e-12	FALSE	103.489	129.824	136.607	130.849	634.019	343.192	677.613	273.695
ENSDARG00000012314	1935.14	0.54702	0.0736105	7.43129	1.07547e-13	8.64305e-12	FALSE	1503.94	1545.57	1537.52	1535.2	2311.2	2290.08	2357.62	1992.11
ENSDARG00000100795	163.046	2.28036	0.306913	7.42999	1.08603e-13	8.70002e-12	FALSE	45.5601	53.465	85.7914	90.9042	363.998	264.588	492.311	229.082
ENSDARG00000051783	69110.2	0.433307	0.0583377	7.42756	1.10618e-13	8.83325e-12	FALSE	61783.7	60661.4	58535.2	63079.2	80759.5	79835.4	90615.1	78350.2
ENSDARG00000095268	1219.67	-0.899786	0.121238	-7.42165	1.15671e-13	9.20742e-12	FALSE	1548.86	1615.28	1625.86	1280.61	688.062	753.635	777.513	1029.29
ENSDARG00000089791	1811.81	0.46025	0.0621733	7.40269	1.33448e-13	1.05889e-11	FALSE	1509.47	1519.01	1589.23	1581.83	2059.33	2149.83	2248.57	2077.59
ENSDARG00000079111	2490.29	-1.16782	0.157821	-7.39969	1.365e-13	1.07969e-11	FALSE	3353.85	3463.71	3580.66	4041.16	1369.83	2320.73	1503.37	1235.72
ENSDARG00000092131	40.8743	3.92401	0.530596	7.39547	1.40907e-13	1.11104e-11	FALSE	2.9431	2.13756	1.00013	8.19326	76.0252	26.3814	78.5472	44.5629
ENSDARG00000059259	15093.8	0.815768	0.110329	7.39395	1.42528e-13	1.12029e-11	FALSE	11640.2	11921.6	11527	11572.4	24669	19976.6	22013.1	15479.6
ENSDARG00000102701	347.28	0.769827	0.104141	7.39214	1.44488e-13	1.13216e-11	FALSE	256.353	225.054	270.464	249.659	421.451	392.26	474.675	418.858
ENSDARG00000088502	25.7801	8.04995	1.09023	7.38372	1.5393e-13	1.20238e-11	FALSE	0	0	0	0	90.0787	31.9438	55.2905	34.4585
ENSDARG00000057408	415.337	-1.39895	0.189577	-7.37932	1.59098e-13	1.23679e-11	FALSE	502.483	567.481	548.452	557.472	146.691	180.741	214.327	281.293
ENSDARG00000101919	351.833	1.74265	0.236159	7.37913	1.59322e-13	1.23679e-11	FALSE	242.202	163.758	161.176	190.689	1019.84	390.628	622.136	497.594
ENSDARG00000060879	174.927	-1.79199	0.242966	-7.37549	1.63746e-13	1.26721e-11	FALSE	287.732	340.461	423.243	330.889	46.7834	130.847	113.076	108.366
ENSDARG00000104826	2615.5	0.658183	0.089311	7.36957	1.7118e-13	1.31871e-11	FALSE	2015.13	1761.94	1930.83	1989.34	3415.59	2617.89	2853.51	3256.34
ENSDARG00000087176	214.825	1.80404	0.244803	7.36936	1.71453e-13	1.31871e-11	FALSE	87.3615	96.6048	129.478	110.891	441.362	411.406	452.208	183.907
ENSDARG00000062864	524.838	-0.628874	0.0853546	-7.36779	1.73482e-13	1.33024e-11	FALSE	611.662	696.568	648.621	639.321	452.21	432.409	399.618	398.506
ENSDARG00000043135	318.061	2.09074	0.283796	7.36706	1.7443e-13	1.33343e-11	FALSE	165.866	144.265	193.301	102.451	1009.93	330.234	791.257	446.703
ENSDARG00000088079	61.7997	-2.15139	0.292419	-7.35724	1.87748e-13	1.43088e-11	FALSE	85.4667	143.158	120.408	118.618	16.807	33.7887	22.5522	31.8769
ENSDARG00000100588	18744.1	0.464645	0.0631835	7.3539	1.92499e-13	1.46265e-11	FALSE	16598.3	15547	17168.3	16155	24390.6	21554.5	23595.6	20807.6
ENSDARG00000016011	1386.06	0.726323	0.0988338	7.34893	1.99799e-13	1.51352e-11	FALSE	1020.58	1093.05	1157.74	1154.57	1820.03	1762.81	2176.35	1572.39
ENSDARG00000009142	5179.72	0.599898	0.0817834	7.33521	2.21381e-13	1.67196e-11	FALSE	3957.8	4112.49	3962.37	4557.74	7108.93	6245.84	6197.51	5602.2
ENSDARG00000056138	12075.2	0.401394	0.0547629	7.32967	2.30728e-13	1.73732e-11	FALSE	10251.2	10378.8	10283.1	11160.1	14372.2	13561.8	14529.4	13115.3
ENSDARG00000013776	1678.81	-0.594149	0.081089	-7.32712	2.35144e-13	1.76527e-11	FALSE	1893.83	2103.83	1927.15	1914.72	1280.69	1430.82	1121.26	1360.8
ENSDARG00000074626	125.122	-1.25865	0.171797	-7.32641	2.36406e-13	1.76945e-11	FALSE	158.774	198.543	194.365	207.434	71.6174	80.8609	74.3002	90.7897
ENSDARG00000041492	330.267	1.60595	0.219236	7.32523	2.38483e-13	1.77968e-11	FALSE	191.764	229.759	183.219	211.543	828.615	501.037	790.799	367.767
ENSDARG00000036376	1177.97	1.32708	0.181532	7.31044	2.66275e-13	1.98118e-11	FALSE	745.456	785.518	821.521	721.105	2576.61	1803.37	2165.56	1169.12
ENSDARG00000099200	4815.99	-1.29384	0.177147	-7.30376	2.79826e-13	2.07585e-11	FALSE	6876.79	7513.33	8294.8	7909.26	1938.63	4392.25	3025.95	3121.73
ENSDARG00000006220	2533.1	-1.0234	0.140135	-7.303	2.81415e-13	2.08147e-11	FALSE	3704.94	4035.03	4104.87	3754.98	1307.63	1878.6	2447.45	2039.63
ENSDARG00000079347	575.985	1.16995	0.160319	7.29765	2.92832e-13	2.15955e-11	FALSE	421.163	369.139	418.831	397.63	1082.12	766.859	1075.52	691.249
ENSDARG00000004199	33.7241	-2.92062	0.400264	-7.29673	2.94838e-13	2.16797e-11	FALSE	57.0367	67.5022	60.3128	62.4515	3.93392	6.68245	4.52432	16.4424
ENSDARG00000020031	802.064	1.23753	0.169725	7.29138	3.06789e-13	2.24441e-11	FALSE	557.915	532.24	598.573	488.397	1697.83	929.259	1508.65	997.999
ENSDARG00000104256	654.53	-1.64056	0.225003	-7.29128	3.07025e-13	2.24441e-11	FALSE	1010.6	1192.16	1510.87	1310.74	247.62	558.2	537.751	269.434
ENSDARG00000037012	4258.7	0.742897	0.101991	7.28395	3.24184e-13	2.36297e-11	FALSE	3292.02	3421.06	3188.71	3107.39	6581.28	5059.09	5649.75	4482.89
ENSDARG00000006691	32481.7	0.718789	0.0987755	7.277	3.41329e-13	2.48072e-11	FALSE	24440.5	22734.6	24266.3	23752.1	37646	31271.9	46593.7	41154.1
ENSDARG00000033443	1170.64	1.10603	0.152018	7.27568	3.44679e-13	2.49783e-11	FALSE	681.245	806.386	823.739	806.811	2217.4	1693.36	1624.2	1186.35
ENSDARG00000095963	259.871	-1.06274	0.146385	-7.2599	3.87381e-13	2.79919e-11	FALSE	388.173	365.693	384.096	421.864	151.253	193.713	234.534	167.773
ENSDARG00000021305	54.9569	1.93838	0.267035	7.25889	3.9027e-13	2.81196e-11	FALSE	12.6938	15.5048	24.3733	22.6955	63.5533	81.2268	75.9439	71.3889
ENSDARG00000099422	224.461	6.71414	0.925148	7.25736	3.94708e-13	2.83579e-11	FALSE	0	8.57403	4.03442	0	43.6717	386.053	378.928	533.369
ENSDARG00000061201	1339.84	-0.829655	0.114515	-7.24492	4.3271e-13	3.09993e-11	FALSE	1708.02	1954.28	1887.91	1746.37	806.421	1228.39	1019.3	1051.12
ENSDARG00000103371	153.39	1.51125	0.208701	7.24122	4.44676e-13	3.17659e-11	FALSE	84.3031	73.2083	100.042	79.2547	237.544	167.723	308.458	245.987
ENSDARG00000036542	1549.04	0.455355	0.063003	7.22751	4.91927e-13	3.50414e-11	FALSE	1412.03	1308.13	1353.95	1310.31	1898.39	1772.41	1918.37	1787.55
ENSDARG00000077219	142.062	1.28293	0.177652	7.22159	5.13836e-13	3.64984e-11	FALSE	90.283	113.774	84.3726	76.6389	273.662	224.442	205.707	183.888
ENSDARG00000103519	785.512	1.441	0.19984	7.21078	5.5634e-13	3.92948e-11	FALSE	504.906	464.9	442.837	395.548	1866.69	1100.86	1140.29	799.2
ENSDARG00000057004	105.119	1.5383	0.213329	7.2109	5.55826e-13	3.92948e-11	FALSE	65.8853	59.9745	58.4536	78.8214	189.942	178.102	246.932	151.552
ENSDARG00000070043	4877.81	0.461802	0.0641131	7.20293	5.89331e-13	4.15081e-11	FALSE	4310.68	4094.13	4344.24	4410.86	6224.5	5427.76	6341.19	5642.89
ENSDARG00000036102	6215.91	0.675304	0.0938032	7.19916	6.05845e-13	4.25517e-11	FALSE	4857.2	4752.89	5470.54	5271.56	9121.14	6964.35	8973	7448.81
ENSDARG00000076838	1670.07	-1.34328	0.186666	-7.19619	6.19193e-13	4.32469e-11	FALSE	2201.14	2422.73	3040.03	3181.78	878.068	1402.04	1291.3	705.928
ENSDARG00000093780	49.7158	-2.30927	0.320899	-7.19627	6.18805e-13	4.32469e-11	FALSE	72.8761	75.1059	111.046	116.406	17.6657	31.7266	16.3064	11.2482
ENSDARG00000016188	1221.35	2.00936	0.279308	7.19407	6.2886e-13	4.38001e-11	FALSE	585.836	655.189	619.118	611.279	3732.17	1569	3213.42	1437.49
ENSDARG00000045150	1427.28	0.542878	0.0754914	7.19126	6.41957e-13	4.45884e-11	FALSE	1200.08	1133.89	1155.62	1256.61	1881.92	1639.59	1809.74	1587.55
ENSDARG00000059646	2470.65	0.643451	0.0895008	7.18933	6.51096e-13	4.50983e-11	FALSE	1921.45	2182.15	1865.93	2167	3363.32	2990.15	3532.64	2830.71
ENSDARG00000103011	932.85	0.8826	0.122786	7.18814	6.56823e-13	4.53696e-11	FALSE	612.873	646.227	793.28	690.474	1473.98	1232.77	1377.55	982.766
ENSDARG00000044521	19443.3	0.431708	0.0600757	7.18607	6.66817e-13	4.58076e-11	FALSE	17871.2	18061.7	16744.7	17471.4	24947.1	24209.6	23911.2	21550.5
ENSDARG00000078844	407.799	1.28303	0.17854	7.18626	6.659e-13	4.58076e-11	FALSE	132.679	228.621	202.913	282.253	441.123	507.021	644.737	481.513
ENSDARG00000056498	1019.19	-3.84845	0.535849	-7.18198	6.87103e-13	4.70722e-11	FALSE	1573.78	2124.94	2995.27	3429.05	43.5011	380.108	131.704	147.52
ENSDARG00000016704	255.138	-1.04581	0.145667	-7.17946	6.99869e-13	4.78161e-11	FALSE	344.489	333.543	418.399	399.67	150.121	234.015	167.676	174.229
ENSDARG00000026376	649.038	-1.03361	0.144007	-7.17746	7.10165e-13	4.83877e-11	FALSE	877.009	1029.15	835.564	825.321	303.171	466.752	447.594	522.164
ENSDARG00000093005	36.4187	3.73321	0.520349	7.17443	7.26067e-13	4.93371e-11	FALSE	0	3.2144	3.97331	8.16795	68.9911	40.9068	45.2495	65.6911
ENSDARG00000019986	1770.73	-0.911143	0.127179	-7.16426	7.82084e-13	5.3e-11	FALSE	2498.83	2367.64	2745.6	2681.57	1021.59	1721.4	1462.94	1268.99
ENSDARG00000020693	7296.87	1.03234	0.144157	7.16122	7.996e-13	5.40409e-11	FALSE	5173.94	5231.6	5744.12	5229.11	14223.8	9711.54	12127.8	7668.1
ENSDARG00000070425	599.56	0.836854	0.116926	7.15714	8.23754e-13	5.55237e-11	FALSE	515.523	396.052	456.258	437.319	942.653	666.487	845.462	763.271
ENSDARG00000068883	556.302	-1.1494	0.160664	-7.15403	8.42637e-13	5.66442e-11	FALSE	900.839	997.373	994.733	844.386	399.066	431.117	462.253	392.773
ENSDARG00000038583	1735.47	-0.414916	0.0580842	-7.14335	9.10861e-13	6.10667e-11	FALSE	1995.77	2054.17	2177.8	2159.2	1592.87	1571.66	1560.12	1572.55
ENSDARG00000079119	567.434	-1.45079	0.203163	-7.14102	9.26393e-13	6.19424e-11	FALSE	683.063	749.328	776.37	848.874	217.652	225.185	243.218	430.278
ENSDARG00000008363	2931.92	1.12944	0.15818	7.14024	9.31652e-13	6.21283e-11	FALSE	1915.2	2146.24	2136.62	1962.97	5288.92	3535.69	5877.69	3155.59
ENSDARG00000105300	335.74	1.02413	0.143503	7.13665	9.56333e-13	6.3605e-11	FALSE	269.21	227.611	167.56	167.603	432.381	404.184	419.666	420.595
ENSDARG00000014517	2998.83	-0.371634	0.0520823	-7.13552	9.64226e-13	6.39603e-11	FALSE	3455.73	3508.77	3311.46	3402.5	2770.75	2629.91	2573.29	2598.14
ENSDARG00000074809	298.802	-1.09332	0.153379	-7.12824	1.01663e-12	6.72583e-11	FALSE	418.761	481.927	539.016	477.482	183.059	233.314	275.872	207.532
ENSDARG00000036041	1617.15	-1.1208	0.157258	-7.12709	1.02511e-12	6.76412e-11	FALSE	2538.63	2357.71	2588.55	2560.48	1005.84	1385.2	1466.68	763.942
ENSDARG00000092890	154.838	-1.20055	0.16892	-7.10723	1.18392e-12	7.79152e-11	FALSE	210.269	266.48	273.878	262.559	122.859	96.4083	126.491	97.2417
ENSDARG00000042934	3403.04	1.25828	0.177241	7.09926	1.25423e-12	8.2326e-11	FALSE	2350.22	2266.28	2421.45	2207.2	7814.61	4124.25	6428.17	3749.78
ENSDARG00000094271	126.917	1.23132	0.173597	7.09302	1.31215e-12	8.59033e-11	FALSE	80.9604	83.7744	69.8245	100.607	239.424	174.97	183.82	190.888
ENSDARG00000089354	874.557	0.643274	0.090829	7.08226	1.41826e-12	9.26077e-11	FALSE	691.031	672.669	638.05	659.775	1120.95	890.786	1057.12	1083.33
ENSDARG00000062182	61.2852	-1.96411	0.277689	-7.07305	1.51561e-12	9.87077e-11	FALSE	96.3691	112.577	110.419	108.457	16.7027	39.2708	24.4447	29.1939
ENSDARG00000020761	2118.9	1.81185	0.256272	7.07001	1.54921e-12	1.00634e-10	FALSE	984.278	1225.87	1357.88	981.376	5075.49	3769.66	4999.77	2131.51
ENSDARG00000069937	735.154	-0.545006	0.0772651	-7.05371	1.74207e-12	1.1287e-10	FALSE	871.572	924.612	892.456	838.657	610.2	626.906	594.709	586.957
ENSDARG00000094584	54.2488	4.36479	0.619161	7.04951	1.79545e-12	1.16028e-10	FALSE	8.41749	3.07118	5.70386	7.81157	302.462	66.2697	115.006	28.5169
ENSDARG00000074667	3416.18	0.737401	0.104646	7.04662	1.83321e-12	1.18164e-10	FALSE	2608.33	2465.31	2997.97	2766.55	5173.12	4003.58	5027.28	3871.95
ENSDARG00000076073	332.282	-1.40271	0.199119	-7.04459	1.86004e-12	1.19586e-10	FALSE	462.866	624.112	611.986	677.741	158.275	206.853	315.841	219.85
ENSDARG00000052957	1094.45	0.585397	0.0831261	7.04228	1.89124e-12	1.21281e-10	FALSE	875.18	777.612	904.827	916.525	1274.81	1422.82	1262.13	1256.97
ENSDARG00000077880	43.3846	-2.19667	0.311955	-7.04164	1.89996e-12	1.2153e-10	FALSE	83.915	89.7631	80.089	60.1208	15.8036	20.7043	17.1501	14.8459
ENSDARG00000077960	97.5974	-1.97589	0.280636	-7.04076	1.91197e-12	1.21987e-10	FALSE	98.006	162.849	232.438	198.251	31.4753	41.9862	47.0496	55.2953
ENSDARG00000102340	3662.18	0.372106	0.0528549	7.04014	1.92053e-12	1.22222e-10	FALSE	3190.52	3227.41	3216.41	3101.46	4184.8	4016.77	4200.72	4079.35
ENSDARG00000059714	132.006	1.44789	0.205686	7.03932	1.93178e-12	1.22626e-10	FALSE	86.7055	92.7511	82.1443	51.4422	230.177	185.909	255.367	178.039
ENSDARG00000100887	116.309	1.78005	0.253002	7.03572	1.98234e-12	1.25202e-10	FALSE	64.075	39.7128	68.6816	53.1988	266.804	144.476	225.639	137.346
ENSDARG00000017984	106.033	2.76598	0.393118	7.03601	1.97828e-12	1.25202e-10	FALSE	20.948	15.3761	25.9675	15.9909	42.4295	91.2356	176.252	221.716
ENSDARG00000104125	75.0477	1.53171	0.217732	7.03484	1.99488e-12	1.25678e-10	FALSE	40.4532	41.6972	29.9238	31.9234	106.976	120.557	101.984	82.9911
ENSDARG00000022372	444.603	-1.25717	0.178733	-7.03382	2.00949e-12	1.26281e-10	FALSE	721.68	700.318	697.138	729.615	191.412	331.014	399.437	269.634
ENSDARG00000035810	3536.89	1.09996	0.156631	7.02262	2.17749e-12	1.36496e-10	FALSE	2375.71	2499.86	2565.04	2757.07	6508.58	5462.76	6519.98	3374.22
ENSDARG00000039943	1456.23	0.793802	0.113099	7.01865	2.24015e-12	1.40073e-10	FALSE	1077.37	1061.62	1057.24	1168.32	2156.67	1783.72	2167.76	1463.87
ENSDARG00000041323	1087.5	0.528731	0.0753411	7.01783	2.25337e-12	1.4055e-10	FALSE	920.836	843.962	882.585	883.264	1409.22	1268.89	1235.61	1179.68
ENSDARG00000070830	291.85	-1.01967	0.145402	-7.01278	2.33622e-12	1.45356e-10	FALSE	437.136	370.202	464.585	426.711	148.171	243.387	224.691	220.53
ENSDARG00000001354	160.97	-1.60066	0.228432	-7.00716	2.43198e-12	1.50939e-10	FALSE	272.669	258.536	341.252	246.438	51.0471	132.561	80.615	104.191
ENSDARG00000086849	133.802	1.43344	0.204622	7.00532	2.46431e-12	1.52568e-10	FALSE	80.3439	81.4694	58.2145	57.867	159.211	162.677	199.149	222.224
ENSDARG00000024717	618.874	-0.867806	0.1239	-7.00406	2.48653e-12	1.53187e-10	FALSE	868.824	808.395	880.469	800.81	356.662	579.425	459.916	443.876
ENSDARG00000040067	75.4889	2.31525	0.330549	7.00425	2.48306e-12	1.53187e-10	FALSE	44.2242	19.404	24.5468	35.6602	182.335	98.7752	211.57	109.879
ENSDARG00000006526	7401.09	1.12937	0.161285	7.00229	2.51806e-12	1.54749e-10	FALSE	5449.54	6209.02	5799.37	6038.87	16481	12139.4	14793.1	7994.05
ENSDARG00000037116	3286.53	0.955709	0.136512	7.00092	2.54292e-12	1.55895e-10	FALSE	2525.55	2533.94	2378.07	2377.16	5843.8	3533.62	5625.26	4032.68
ENSDARG00000069828	275.86	-1.15515	0.165014	-7.00032	2.55376e-12	1.56178e-10	FALSE	334.008	449.531	465.762	414.907	136.354	237.79	201.672	173.007
ENSDARG00000100174	1226.84	2.12802	0.304013	6.99977	2.56376e-12	1.56408e-10	FALSE	308.932	356.626	354.154	512.486	1046.78	1420.34	1643.3	2591.77
ENSDARG00000035005	368.798	-0.850749	0.121553	-6.99897	2.57851e-12	1.56926e-10	FALSE	465.563	537.405	496.397	471.538	209.542	291.132	309.468	281.792
ENSDARG00000096978	54.4788	-2.42578	0.346861	-6.99354	2.6803e-12	1.62726e-10	FALSE	84.3503	151.419	119.417	129.688	25.4824	11.5903	23.5713	29.3087
ENSDARG00000025850	14520.5	0.469385	0.0671349	6.99168	2.71622e-12	1.64508e-10	FALSE	13378.3	12474.3	12706.5	12519.5	19388.3	17426.7	18191.7	15711.2
ENSDARG00000032496	239.844	-0.95384	0.136556	-6.98497	2.8492e-12	1.72147e-10	FALSE	308.561	354.271	382.29	382.13	151.009	179.349	217.523	189.982
ENSDARG00000010936	1264.04	-1.50159	0.214992	-6.98441	2.86048e-12	1.72413e-10	FALSE	1916.84	2190.4	2535.28	2478.59	591.01	1201.33	920.086	510.969
ENSDARG00000013576	228.857	1.91814	0.274768	6.98095	2.93186e-12	1.76291e-10	FALSE	110.753	105.593	127.166	119.94	701.209	364.159	470.215	219.388
ENSDARG00000093768	1297.71	0.900245	0.128967	6.98044	2.94265e-12	1.76517e-10	FALSE	1006.21	887.689	916.166	935.584	2298.33	1365.37	1625.03	1699.7
ENSDARG00000076371	671.187	-0.593389	0.0850969	-6.9731	3.10025e-12	1.85527e-10	FALSE	875.473	870.938	762.468	892.482	537.081	580.513	581.129	554.627
ENSDARG00000093303	783.061	1.63194	0.234724	6.95259	3.58652e-12	2.14115e-10	FALSE	507.513	496.982	477.301	434.307	1818.83	1272.77	2141.56	705.093
ENSDARG00000030402	378.562	1.01038	0.145394	6.94929	3.67135e-12	2.18659e-10	FALSE	312.421	232.229	263.406	282.216	660.115	478.221	597.51	457.572
ENSDARG00000034291	16965.9	0.438552	0.0631155	6.9484	3.69459e-12	2.19522e-10	FALSE	15644.4	15056.7	15007.4	14672.7	22425	19858.8	20999.5	18546.9
ENSDARG00000056374	78.9604	1.56814	0.225738	6.94674	3.73833e-12	2.21596e-10	FALSE	49.5949	40.7588	52.1573	39.7322	159.068	117.1	146.719	116.142
ENSDARG00000014059	731.366	1.57418	0.226943	6.93644	4.0211e-12	2.37795e-10	FALSE	439.853	419.079	472.919	425.092	1809.69	724.823	1793.93	904.301
ENSDARG00000022891	2584.68	0.392185	0.0566047	6.92849	4.25367e-12	2.50957e-10	FALSE	2242.53	2253.53	2219.58	2260.01	3169.88	2926.49	2863.3	2823.9
ENSDARG00000104956	53.1033	-2.34112	0.337939	-6.92765	4.27886e-12	2.5185e-10	FALSE	152.124	78.1145	138.681	96.4371	19.2241	18.6677	33.7546	19.8682
ENSDARG00000017047	277.355	-1.03052	0.148784	-6.92629	4.32009e-12	2.53682e-10	FALSE	374.642	404.473	368.618	412.442	143.302	216.248	174.832	227.929
ENSDARG00000079403	58.6401	1.87193	0.270335	6.92448	4.37574e-12	2.56349e-10	FALSE	20.3648	34.3616	23.5009	23.4203	101.943	104.265	77.0545	90.9131
ENSDARG00000038306	4847.45	0.540012	0.078063	6.91764	4.59217e-12	2.68401e-10	FALSE	4138.7	4102.87	3917.97	4037.66	6603.65	5915.86	5967.11	5065.78
ENSDARG00000042684	1270.43	-1.0473	0.151409	-6.917	4.61314e-12	2.69e-10	FALSE	1692.56	1841	2096.96	2131.83	627.218	1171.41	1019.07	939.395
ENSDARG00000024160	509.048	-0.86814	0.125521	-6.91629	4.63625e-12	2.6972e-10	FALSE	600.406	751.763	758.183	788.351	362.213	457.925	441.373	331.409
ENSDARG00000091800	147.609	-1.58023	0.228823	-6.90589	4.98888e-12	2.89563e-10	FALSE	228.174	274.281	273.94	300.524	63.9309	119.299	103.15	74.7294
ENSDARG00000041623	1659.26	1.19815	0.173554	6.90362	5.06937e-12	2.93555e-10	FALSE	1118.87	1177.8	1219.18	1208.52	3315.75	3341.27	2626.73	1561.53
ENSDARG00000033285	1430.76	-0.83888	0.121539	-6.90213	5.123e-12	2.95977e-10	FALSE	1915.68	1937.21	2264.36	1938.53	989.28	1067.35	1415.63	1032.53
ENSDARG00000035422	105.15	1.65404	0.239758	6.89881	5.24411e-12	3.01584e-10	FALSE	46.7215	66.4757	78.8618	54.2256	241.688	195.421	223.629	120.526
ENSDARG00000101816	4219.32	-1.80032	0.260959	-6.89888	5.24146e-12	3.01584e-10	FALSE	6237.04	5826.73	6060.74	5544.67	1105.66	1609.55	1437.97	2640.78
ENSDARG00000059816	541.114	1.12507	0.163164	6.89533	5.37402e-12	3.08348e-10	FALSE	376.313	249.189	336.901	392.381	676.838	605.479	952.826	713.327
ENSDARG00000090552	1142.55	1.35847	0.197309	6.88498	5.77965e-12	3.30865e-10	FALSE	772.646	747.98	805.022	738.822	3015.54	1480.42	2083.55	1281.04
ENSDARG00000030915	335.761	-1.89563	0.275367	-6.88401	5.81919e-12	3.3237e-10	FALSE	450.56	790.334	800.651	673.84	180.792	278.458	188.926	83.9648
ENSDARG00000067918	483.691	0.71022	0.103291	6.87591	6.15947e-12	3.51006e-10	FALSE	387.416	339.865	343.268	339.339	630.199	615.729	560.001	496.908
ENSDARG00000060350	1867.1	-1.86715	0.271573	-6.87531	6.18537e-12	3.51682e-10	FALSE	2418.46	3800.61	4019.72	3278.94	551.529	1372.05	879.103	902.701
ENSDARG00000097959	1158.01	-2.00242	0.291531	-6.86862	6.48274e-12	3.66926e-10	FALSE	2147.15	2013.9	1937.54	2293.89	651.843	364.174	549.638	529.065
ENSDARG00000037533	27.411	-4.10825	0.598117	-6.86864	6.48147e-12	3.66926e-10	FALSE	78.7602	34.3366	94.4375	74.0417	0	10.5685	4.53002	1.49949
ENSDARG00000093365	90.0789	2.22383	0.323951	6.86471	6.66269e-12	3.76262e-10	FALSE	40.799	41.9811	36.2138	39.5939	319.514	98.2884	141.084	181.44
ENSDARG00000100003	9470.51	0.775955	0.113093	6.86121	6.8282e-12	3.84742e-10	FALSE	7363.86	7570.64	8053.56	7572.2	14897.2	11302.6	15633.3	10501
ENSDARG00000036722	72.6556	-1.56611	0.22852	-6.85328	7.21777e-12	4.05781e-10	FALSE	113.642	114.823	118.824	87.4997	32.3792	38.4881	37.1474	38.2588
ENSDARG00000092033	232.69	1.04875	0.153076	6.85117	7.32483e-12	4.10878e-10	FALSE	172.595	132.787	150.444	185.981	348.75	348.167	370.596	260.777
ENSDARG00000001950	30760.6	0.665487	0.0971866	6.84752	7.51436e-12	4.20569e-10	FALSE	26431.4	24987.7	25639.1	25763.7	45035	40971.6	45314.2	31768.5
ENSDARG00000062319	368.497	-1.43063	0.209093	-6.84209	7.80456e-12	4.35839e-10	FALSE	483.618	479.131	468.84	442.216	125.811	138.698	162.929	264.823
ENSDARG00000018077	26.714	-3.40227	0.497512	-6.83858	7.99815e-12	4.45657e-10	FALSE	42.6465	47.0376	108.863	65.4924	2.96049	5.6622	6.32172	9.66282
ENSDARG00000009401	1133.14	-0.953775	0.139493	-6.83744	8.0619e-12	4.48213e-10	FALSE	1461.49	1629.14	1487.64	1359.84	674.275	594.084	825.015	968.755
ENSDARG00000012194	2657.41	-0.838321	0.122656	-6.83472	8.21639e-12	4.54785e-10	FALSE	3381.37	3731	3879.67	4090.13	1562.9	2453.25	2413.88	2007.32
ENSDARG00000093619	372.178	-1.6434	0.240447	-6.83479	8.21237e-12	4.54785e-10	FALSE	660.634	628.537	703.043	790.362	122.071	323.499	283.97	161.927
ENSDARG00000003931	1810.38	-0.766963	0.112288	-6.83034	8.47122e-12	4.67858e-10	FALSE	2318.18	2318.87	2559.49	2679.68	1126.51	1738.17	1464.86	1475.39
ENSDARG00000087070	74.4257	-1.9145	0.280562	-6.82381	8.86591e-12	4.8858e-10	FALSE	125.382	93.4166	216.419	152.753	34.4857	28.2406	44.3098	48.4314
ENSDARG00000100731	1456.46	-0.527127	0.0773083	-6.8185	9.19929e-12	5.0584e-10	FALSE	1695.81	1907.83	1901.88	1900.2	1181.28	1373.53	1356.26	1232.82
ENSDARG00000078918	133.885	-1.93401	0.283786	-6.81504	9.42401e-12	5.17063e-10	FALSE	206.502	223.79	272.425	303.577	36.7253	118.224	57.4767	51.6643
ENSDARG00000076820	120.704	-1.76662	0.259657	-6.8037	1.01969e-11	5.58246e-10	FALSE	134.26	176.946	157.588	192.419	29.4655	42.1917	42.5598	78.6408
ENSDARG00000035629	163.63	-1.23656	0.181835	-6.80044	1.04301e-11	5.68595e-10	FALSE	234.939	290.628	295.439	220.41	83.482	135.225	119.533	104.113
ENSDARG00000076710	83.5183	1.90569	0.280231	6.80042	1.04313e-11	5.68595e-10	FALSE	18.9829	27.8756	41.4115	27.1157	105.133	90.982	155.719	86.8282
ENSDARG00000055510	1014.06	0.617669	0.0908735	6.79702	1.06806e-11	5.80924e-10	FALSE	848.416	757.03	921.368	845.981	1291.8	1295.31	1402.24	1188.82
ENSDARG00000094747	22.1108	7.44374	1.09532	6.79598	1.0758e-11	5.83864e-10	FALSE	0	0	0	0	18.2585	29.9488	35.4081	54.1476
ENSDARG00000088911	34.4564	-2.01298	0.296263	-6.79455	1.08647e-11	5.88385e-10	FALSE	64.3494	55.9368	73.1504	73.1002	16.0957	20.6654	18.4623	11.3711
ENSDARG00000054746	1105.6	-0.648226	0.0954109	-6.79405	1.09031e-11	5.8919e-10	FALSE	1373.74	1402.75	1192.27	1253.17	753.489	810.116	784.313	977.371
ENSDARG00000098589	2214.61	-0.591042	0.0870297	-6.79127	1.11154e-11	5.99369e-10	FALSE	2662.78	2976.58	3082.57	2962.88	1852.68	1860.46	2212.41	1835.73
ENSDARG00000037894	930.488	1.04178	0.153414	6.79068	1.11608e-11	6.00529e-10	FALSE	629.917	555.201	738.802	669.597	1587.68	1050.86	1664.16	1040.21
ENSDARG00000023298	20359	0.416514	0.061339	6.79037	1.11849e-11	6.00536e-10	FALSE	18349	17395.4	18385.2	18013.4	26809.8	22794.8	23549.7	23136.7
ENSDARG00000100442	689.128	-1.18999	0.175257	-6.79	1.12135e-11	6.00783e-10	FALSE	1004.98	1217.88	1100.47	1134.47	289.468	520.78	547.402	593.258
ENSDARG00000102087	96.2693	-1.60529	0.236711	-6.78166	1.18802e-11	6.35147e-10	FALSE	130.157	196.08	200.702	129.425	64.9084	64.9192	35.29	51.571
ENSDARG00000100709	1226.03	-1.12199	0.165459	-6.7811	1.19268e-11	6.3628e-10	FALSE	1652.04	1779.28	1831.17	1835.55	491.549	1067.28	841.731	860.521
ENSDARG00000091916	489.788	-1.00694	0.148549	-6.77852	1.21413e-11	6.46352e-10	FALSE	652.307	814.351	789.835	799.39	269.315	373.147	490.866	387.891
ENSDARG00000075564	1366.27	0.80045	0.11817	6.77373	1.25506e-11	6.66726e-10	FALSE	937.494	1039.12	1084.48	1154.68	2171.23	1744.63	2002.9	1434.75
ENSDARG00000098080	2788.57	0.602299	0.0889582	6.77059	1.28257e-11	6.79897e-10	FALSE	2152	2288.36	2251.17	2180.45	3878.03	3161.91	3580.13	2854.91
ENSDARG00000055792	3309.64	0.549982	0.0813836	6.7579	1.40006e-11	7.40615e-10	FALSE	2854.78	2723.41	2596.77	2969.28	4505.44	3935.97	4288.19	3589.24
ENSDARG00000100504	85.0942	3.3723	0.499323	6.75375	1.4407e-11	7.60507e-10	FALSE	18.9865	21.4411	25.6443	15.3681	350.809	193.382	272.491	27.6901
ENSDARG00000070437	14398.4	0.482192	0.0713994	6.75345	1.44375e-11	7.60516e-10	FALSE	12478.1	11850.7	12941.6	12996.6	19006.1	16228.8	18960	16028.2
ENSDARG00000067767	27.3413	3.49014	0.517072	6.74982	1.4803e-11	7.78135e-10	FALSE	5.84885	2.14309	3.95364	4.52474	49.1685	61.1197	23.5279	47.8411
ENSDARG00000077504	65.704	-2.80906	0.416541	-6.74378	1.54319e-11	8.09498e-10	FALSE	182.938	184.898	104.72	133.765	38.6129	28.0356	12.6083	8.13863
ENSDARG00000102945	16.3521	-3.99833	0.593381	-6.73821	1.60355e-11	8.39401e-10	FALSE	39.9261	47.8207	48.5893	30.4304	2.68399	4.1752	3.67384	0
ENSDARG00000004904	249.99	-1.43562	0.213535	-6.72315	1.77843e-11	9.29006e-10	FALSE	287.819	435.057	409.911	457.233	92.6293	213.08	154.26	129.428
ENSDARG00000098838	134.888	-0.998842	0.148586	-6.72232	1.78851e-11	9.32332e-10	FALSE	211.821	188.664	167.744	174.509	94.3488	95.6871	96.8577	83.7996
ENSDARG00000099961	2017.29	0.531881	0.0791592	6.71913	1.82817e-11	9.5103e-10	FALSE	1767.1	1686.49	1690.18	1745.85	2689.86	2280.02	2722.58	2269.08
ENSDARG00000062788	407.744	3.45805	0.514953	6.71527	1.87724e-11	9.74535e-10	FALSE	86.9608	111.599	85.8421	89.9868	2535.97	550.792	598.353	431.05
ENSDARG00000020114	546.299	1.38418	0.206294	6.70976	1.94951e-11	1.00996e-09	FALSE	357.688	412.441	357.688	343.49	1405.8	739.142	852.457	844.021
ENSDARG00000003635	225.29	-0.991196	0.147748	-6.70871	1.96354e-11	1.01513e-09	FALSE	314.558	340.67	345.317	297.881	121.981	153.569	187.281	188.267
ENSDARG00000097491	354.253	-1.10015	0.164143	-6.70238	2.05051e-11	1.05791e-09	FALSE	489.388	468.441	437.136	409.606	129.731	233.468	217.25	258.128
ENSDARG00000103844	209.896	-1.43355	0.214173	-6.69342	2.18018e-11	1.1225e-09	FALSE	476.095	225.66	402.571	447.715	131.498	111.048	164.588	165.842
ENSDARG00000015866	28576.2	-1.16015	0.173401	-6.69058	2.22294e-11	1.14217e-09	FALSE	39271.8	40854.7	48632.9	50398.7	14177.7	29860	19123.9	17007.5
ENSDARG00000058158	421.071	1.45457	0.217419	6.69016	2.22928e-11	1.14309e-09	FALSE	204.557	237.955	294.15	280.348	983.901	573.889	825.499	412.185
ENSDARG00000037191	535.158	-1.69429	0.253372	-6.68696	2.27859e-11	1.16598e-09	FALSE	674.814	799.744	977.768	912.17	114.648	428.691	259.331	237.445
ENSDARG00000087937	825.245	-0.660505	0.0987851	-6.68628	2.28913e-11	1.16899e-09	FALSE	1082.41	1031.65	1126.62	999.87	727.091	624.146	695.545	635.974
ENSDARG00000060569	608.657	-0.795029	0.118929	-6.6849	2.31089e-11	1.17771e-09	FALSE	744.264	809.096	739.919	738.906	375.614	488.11	359.391	522.012
ENSDARG00000095908	1686.65	1.13947	0.170494	6.68335	2.33546e-11	1.18782e-09	FALSE	940.301	1042.88	1055.41	1567.89	2495.76	3162.8	2597.88	1890.97
ENSDARG00000002295	449.635	1.46282	0.218896	6.6827	2.34578e-11	1.19065e-09	FALSE	275.884	283.934	297.006	305.128	1253.58	664.2	779.298	509.644
ENSDARG00000093584	1024.38	-1.12372	0.168264	-6.67834	2.41662e-11	1.22413e-09	FALSE	1369.31	1166.33	1294.8	1392.36	632.229	381.223	622.693	758.34
ENSDARG00000056722	2234.62	-0.727482	0.109037	-6.67191	2.52495e-11	1.27642e-09	FALSE	2724.47	2709.28	2555.02	2758.25	1382.85	1901.13	1354.46	1849.83
ENSDARG00000037874	16.432	7.33275	1.10026	6.66457	2.65442e-11	1.33917e-09	FALSE	0	0	0	0	49.2991	27.7898	29.9499	21.7455
ENSDARG00000092610	1384.83	0.530884	0.0797321	6.65835	2.76926e-11	1.39431e-09	FALSE	1131.5	1172.53	1060.14	1155.46	1838.68	1609.95	1634.95	1450.44
ENSDARG00000006242	6344.23	0.689118	0.103555	6.6546	2.84079e-11	1.42745e-09	FALSE	5627.46	4802.71	5185.69	5040.83	10055.8	7276.44	8737.36	7232.36
ENSDARG00000094210	993	0.772732	0.116141	6.65342	2.86358e-11	1.43603e-09	FALSE	858.441	775.954	799.085	804.579	1578.18	1555.85	1311.7	1087.28
ENSDARG00000057064	582.095	-1.1238	0.169084	-6.64643	3.00297e-11	1.50292e-09	FALSE	811.219	906.916	862.611	976.606	271.727	500.736	484.79	375.974
ENSDARG00000017602	1800.83	0.526352	0.0792193	6.64423	3.04798e-11	1.52241e-09	FALSE	1481.3	1546.18	1656.08	1498.93	2180.47	2356.1	2358.59	2015.72
ENSDARG00000094423	179.484	1.10857	0.166933	6.64083	3.11931e-11	1.55494e-09	FALSE	111.28	110.849	143.707	136.532	279.84	262.139	328.242	217.056
ENSDARG00000017571	2479.95	-0.647798	0.0976248	-6.63559	3.2321e-11	1.60797e-09	FALSE	2972.39	3177.1	3235	2927.66	1572.52	2150.74	1988.83	2144.4
ENSDARG00000017312	1510.85	0.407862	0.0615083	6.631	3.33421e-11	1.65396e-09	FALSE	1338.95	1299.03	1274.15	1358.1	1777.71	1716.59	1784.63	1712.95
ENSDARG00000095351	425.16	0.856719	0.129202	6.63084	3.33773e-11	1.65396e-09	FALSE	342.599	322.138	308.608	352.348	575.25	702.25	603.603	520.403
ENSDARG00000088357	1960.06	-0.406388	0.0613183	-6.62752	3.41373e-11	1.68828e-09	FALSE	2195.31	2244.81	2217.58	2290.93	1609.68	1807.13	1576.05	1759.3
ENSDARG00000093019	286.691	2.88791	0.436344	6.61842	3.63066e-11	1.79203e-09	FALSE	108.251	46.0211	98.0472	129.105	869.694	632.05	1034.14	276.963
ENSDARG00000010603	296.395	-0.92483	0.139766	-6.61701	3.66547e-11	1.80566e-09	FALSE	369.757	422.273	362.423	417.903	204.479	215.095	171.964	236.33
ENSDARG00000060862	2908.32	0.451929	0.0683588	6.61112	3.81413e-11	1.86961e-09	FALSE	2309.3	2218.21	2480.2	2681.26	3229.97	3374.78	3395.06	3265.26
ENSDARG00000004325	362.575	0.960863	0.145334	6.61142	3.80645e-11	1.86961e-09	FALSE	233.024	252.795	293.687	262.592	629.059	442.697	560.746	403.238
ENSDARG00000095739	37.5546	3.03091	0.458466	6.61099	3.81766e-11	1.86961e-09	FALSE	11.758	4.27711	10.9743	3.63633	32.5536	45.3533	102.074	62.4739
ENSDARG00000074684	187.361	-1.35173	0.204548	-6.60839	3.88529e-11	1.89902e-09	FALSE	220.147	289.662	263.496	294.246	58.8956	140.285	106.888	112.452
ENSDARG00000018002	855.877	-0.569396	0.0861979	-6.60568	3.95696e-11	1.93029e-09	FALSE	1006.41	1051.9	1009.27	933.022	641.475	746.431	601.083	704.848
ENSDARG00000075261	1554.68	3.61987	0.548156	6.60372	4.00962e-11	1.95218e-09	FALSE	342.534	354.98	277.26	321.796	7926.68	3067.74	4313.96	630.653
ENSDARG00000055036	134.339	-1.9471	0.294891	-6.60278	4.03527e-11	1.96086e-09	FALSE	228.078	200.316	312.386	226.605	36.2011	111.348	54.1597	50.8429
ENSDARG00000094889	924.715	2.47618	0.375062	6.60207	4.05464e-11	1.96646e-09	FALSE	386.128	374.392	337.401	337.476	3659.78	1249.64	2230.63	853.235
ENSDARG00000102362	3266.9	-0.524846	0.0795242	-6.59984	4.11614e-11	1.99243e-09	FALSE	3834.91	4055.05	3860.09	3797.99	2797.13	2941.31	2344.06	2725.12
ENSDARG00000077058	62.6563	-2.04007	0.30962	-6.58896	4.42927e-11	2.13987e-09	FALSE	105.214	166.131	136.247	126.623	15.7279	52.5932	33.4892	28.4231
ENSDARG00000025325	734.554	0.599622	0.0910854	6.58307	4.60833e-11	2.2221e-09	FALSE	560.337	541.433	559.019	582.253	787.235	799.037	830.677	979.96
ENSDARG00000103849	2354.91	-1.67226	0.254091	-6.58134	4.6623e-11	2.24381e-09	FALSE	3602.51	3810.76	3811.92	3661.16	1144	1814.13	791.149	922.52
ENSDARG00000104173	2463.36	-0.493556	0.0750133	-6.57959	4.71761e-11	2.26366e-09	FALSE	3034.79	3104.72	2769.38	2852.94	2216.83	2222.16	1917.42	1997.51
ENSDARG00000069335	384.125	1.62438	0.246886	6.57946	4.7216e-11	2.26366e-09	FALSE	211.094	191.074	253.988	222.655	866.955	322.86	938.898	582.576
ENSDARG00000061226	2439.29	0.699021	0.106319	6.57477	4.87292e-11	2.33175e-09	FALSE	1960.24	1922.26	1956.68	2069.46	3743.26	2761.03	3631.9	2706.97
ENSDARG00000104524	15.1188	-8.10978	1.23372	-6.57341	4.91748e-11	2.34859e-09	FALSE	8.71465	37.4914	59.6733	75.5463	0	0	0	0
ENSDARG00000012060	1414.92	-0.665328	0.101243	-6.5716	4.97783e-11	2.37289e-09	FALSE	1623.71	1636.48	1684.73	1618.18	890.786	1219.53	891.284	1135.51
ENSDARG00000103650	38.4342	2.8386	0.432108	6.56918	5.05917e-11	2.40709e-09	FALSE	20.3699	11.5932	3.78929	8.35353	84.0148	30.2152	86.7671	76.8141
ENSDARG00000036239	8198.04	-0.625837	0.0953156	-6.56595	5.17025e-11	2.45528e-09	FALSE	11205.3	11296.8	10463.2	11446.5	6906.41	8497.48	7337.63	6042.01
ENSDARG00000099091	1101.73	0.908102	0.138424	6.56029	5.3702e-11	2.54541e-09	FALSE	907.809	533.137	651.182	754.806	1273.68	1535.15	1335.4	1187.85
ENSDARG00000059906	3910.71	1.10679	0.168782	6.55751	5.47149e-11	2.58366e-09	FALSE	3065.15	2727.97	2703.73	2775.95	8467.24	4899.38	6911.93	3998.78
ENSDARG00000069295	489.912	1.39015	0.211991	6.55758	5.46887e-11	2.58366e-09	FALSE	317.885	387.261	241.944	351.165	1167.24	621.444	1018.09	597.389
ENSDARG00000063438	3424.06	0.524414	0.0801112	6.54607	5.90698e-11	2.78406e-09	FALSE	3034.22	3185.77	2729.27	2778.21	4659.73	3904.98	4448.89	3850.14
ENSDARG00000036316	13618.5	0.419666	0.0641199	6.54502	5.94882e-11	2.79851e-09	FALSE	12164.7	12553.5	11880.8	12056.1	17434.6	15420.8	17409.2	14820.9
ENSDARG00000075428	87.9182	2.171	0.332022	6.53873	6.20449e-11	2.9065e-09	FALSE	10.2666	20.334	30.8096	47.1842	106.402	112.93	134.692	147.566
ENSDARG00000045442	1346.05	-2.4568	0.37573	-6.53876	6.20325e-11	2.9065e-09	FALSE	2094.23	2893.11	2801.78	2733.96	257.699	965.582	380.13	313.86
ENSDARG00000102057	28.3407	-2.89431	0.442655	-6.53852	6.21314e-11	2.9065e-09	FALSE	54.8937	58.9443	80.7515	63.5742	4.39401	4.92062	19.8291	8.20631
ENSDARG00000102552	105.209	2.097	0.320756	6.5377	6.24732e-11	2.91705e-09	FALSE	7.31149	41.7892	53.3797	28.0548	142.594	164.24	134.83	128.566
ENSDARG00000053656	4102.67	-0.491119	0.0751374	-6.53628	6.30693e-11	2.9394e-09	FALSE	4992.39	4920.94	4879.12	4951.95	3963.56	3562.55	3027.24	3495.29
ENSDARG00000045548	83.7163	8.13287	1.24528	6.53096	6.53508e-11	3.04008e-09	FALSE	2.9786	1.07924	0	0	548.663	205.447	204.925	32.1207
ENSDARG00000095675	471.377	0.988569	0.151443	6.52768	6.67947e-11	3.1015e-09	FALSE	287.344	305.372	404.172	396.65	692.165	689.358	822.652	570.572
ENSDARG00000100392	26922.1	0.38562	0.0591505	6.5193	7.06378e-11	3.27389e-09	FALSE	23709.2	23148.4	24269.6	25666.4	34529.9	31134.3	30086	30712.6
ENSDARG00000078659	791.596	1.39202	0.21366	6.5151	7.2642e-11	3.36056e-09	FALSE	526.894	537.682	505.333	499.32	1998.47	922.594	1673.97	836.596
ENSDARG00000077982	587.875	1.36473	0.209508	6.51397	7.31878e-11	3.37958e-09	FALSE	442.406	344.626	403.582	407.885	1579	631.039	1053.27	852.56
ENSDARG00000006169	1092.67	0.746146	0.114647	6.50819	7.60629e-11	3.50589e-09	FALSE	741.143	776.659	765.39	842.408	1007.06	1412.37	1482.65	1343.18
ENSDARG00000069603	2235.59	0.518669	0.0797044	6.50741	7.6457e-11	3.51758e-09	FALSE	1721.78	1656.56	1786.35	1859.14	2407.69	2460.91	2686.15	2511.55
ENSDARG00000022712	932.447	1.07353	0.165011	6.50581	7.72765e-11	3.54878e-09	FALSE	665.206	700.255	650.39	656.386	1816.4	1048.55	1711.15	1049.29
ENSDARG00000101499	24.9387	7.3727	1.1347	6.4975	8.1666e-11	3.7435e-09	FALSE	0	0	0	0	34.9399	9.41273	65.3036	22.3746
ENSDARG00000103067	1038.09	0.900923	0.138732	6.49398	8.35971e-11	3.82502e-09	FALSE	877.951	761.391	820.867	770.75	2008.95	1276.17	1514.71	1231.19
ENSDARG00000063661	290.633	1.34081	0.206535	6.49191	8.47534e-11	3.87087e-09	FALSE	171.969	173.824	216.153	210.232	699.709	364.46	559.876	337.484
ENSDARG00000059700	161.854	-1.00114	0.154407	-6.48376	8.94618e-11	4.07848e-09	FALSE	209.742	244.33	214.548	264.886	90.3655	131.429	128.278	117.115
ENSDARG00000095807	410.263	-1.61289	0.249002	-6.47742	9.33016e-11	4.24582e-09	FALSE	584.423	596.737	781.451	854.58	123.797	354.829	280.634	162.8
ENSDARG00000060594	3469.31	-0.524684	0.0810228	-6.47576	9.43349e-11	4.28506e-09	FALSE	4079.1	4308.49	4120.02	3971.88	2446.29	3244.07	2778.67	2984.32
ENSDARG00000099546	660.522	-1.01614	0.156946	-6.47447	9.51426e-11	4.31393e-09	FALSE	839.801	989.817	1064.51	1028.32	348.102	648.949	468.582	475.336
ENSDARG00000101631	1507.73	-0.506125	0.0781841	-6.4735	9.57576e-11	4.33398e-09	FALSE	1803.47	1750.5	1872.45	1858.36	1274.26	1331.6	1158.13	1365.26
ENSDARG00000010752	482.599	1.41593	0.218762	6.47245	9.64243e-11	4.35629e-09	FALSE	317.33	284.477	334.328	310.061	1277.78	738.431	851.025	460.26
ENSDARG00000079302	5697.16	-1.24643	0.192712	-6.46787	9.93951e-11	4.48243e-09	FALSE	7711	7754.59	7394.45	7533.08	3402.23	2181.63	2936.65	4287.91
ENSDARG00000102490	598.847	0.991203	0.153602	6.45306	1.09615e-10	4.93445e-09	FALSE	498.411	387.625	428.743	415.443	1187.04	769.406	756.138	719.064
ENSDARG00000038834	1473.09	-0.441346	0.0684092	-6.45156	1.10705e-10	4.97456e-09	FALSE	1665.16	1754.04	1816.43	1661.35	1201.59	1365.69	1316.24	1199.55
ENSDARG00000101324	46624.3	-1.11191	0.172365	-6.45094	1.11158e-10	4.98598e-09	FALSE	64985.6	64965.9	78117.6	77854.9	20895.1	43615.1	38504.2	29277.8
ENSDARG00000017780	972.426	0.836271	0.129699	6.44777	1.13508e-10	5.08231e-09	FALSE	811.487	728.511	606.317	702.774	1191.78	1022.71	1536.85	1327.14
ENSDARG00000070584	677.13	-1.13266	0.175937	-6.43789	1.21144e-10	5.41455e-09	FALSE	917.662	972.461	1006.07	1044.58	296.99	567.459	433.437	499.512
ENSDARG00000069048	1933.78	-0.438661	0.0681447	-6.43719	1.21702e-10	5.42979e-09	FALSE	2602.46	2305.5	2339.9	2276.85	1764.19	1685.16	1838.11	1732.81
ENSDARG00000079286	1493.46	0.377987	0.0587252	6.43654	1.22228e-10	5.44361e-09	FALSE	1272.89	1248.79	1241.8	1315.23	1684.1	1583.04	1714.19	1620.54
ENSDARG00000020133	230.841	1.45929	0.226801	6.43423	1.24103e-10	5.51731e-09	FALSE	118.129	138.406	132.673	151.456	576.013	322.662	366.939	226.41
ENSDARG00000087697	2707.67	1.0012	0.155641	6.43279	1.25286e-10	5.56004e-09	FALSE	2215.48	1901.74	2048.56	1822.66	4863.01	3161.5	5052.47	2910.62
ENSDARG00000030441	2444.49	-0.368103	0.057242	-6.43065	1.2706e-10	5.62881e-09	FALSE	2699.82	2698.11	2763.65	2852.17	2153.84	2126.58	2126.08	2130.62
ENSDARG00000091624	542.317	-1.12481	0.175073	-6.4248	1.32044e-10	5.83929e-09	FALSE	892.329	863.521	812.243	811.789	235.104	406.206	506.173	401.063
ENSDARG00000036888	155.337	1.41587	0.220527	6.42039	1.35922e-10	5.99896e-09	FALSE	79.4945	68.9824	79.6207	80.951	239.908	242.355	142.137	199.007
ENSDARG00000041595	296.497	-1.70314	0.26528	-6.42016	1.36133e-10	5.99896e-09	FALSE	457.184	614.261	548.497	707.903	91.3933	232.581	238.081	153.402
ENSDARG00000101239	1467.65	-0.656746	0.102326	-6.41819	1.37906e-10	6.06641e-09	FALSE	1691.65	1769.58	1882.39	2066.36	969.417	1270.03	1273.68	1189.49
ENSDARG00000045611	566.267	1.15479	0.179998	6.41558	1.40292e-10	6.16058e-09	FALSE	360.147	373.78	361.573	462.934	1147.48	693.46	1029.36	605.503
ENSDARG00000099646	114.05	-2.04767	0.319302	-6.41296	1.42718e-10	6.25612e-09	FALSE	270.62	195.415	307.592	198.211	52.9391	50.1787	45.3228	85.6352
ENSDARG00000021720	1297.01	-1.26842	0.197847	-6.41111	1.44466e-10	6.32171e-09	FALSE	1332.28	1553.54	1713.29	1620.59	415.416	675.127	504.513	983.407
ENSDARG00000016319	1737.75	-1.20777	0.188421	-6.40995	1.45567e-10	6.35878e-09	FALSE	2495.03	2461.07	2934.59	2862.56	706.996	1354.24	1660.73	934.072
ENSDARG00000010873	6217.27	0.439876	0.0686535	6.4072	1.48217e-10	6.4585e-09	FALSE	5353.47	5148.27	5289.62	5644.48	7828.52	6976.3	7736.44	6542.68
ENSDARG00000103840	407.174	1.04863	0.163669	6.40705	1.48365e-10	6.4585e-09	FALSE	298.975	247.518	296.165	332.908	672.513	663.915	675.302	423.576
ENSDARG00000098662	366.373	1.16765	0.182369	6.40265	1.52701e-10	6.63574e-09	FALSE	204.972	268.817	230.832	298.972	607.215	479.088	752.562	423.31
ENSDARG00000021149	1692.4	-0.690497	0.107932	-6.39754	1.57899e-10	6.84978e-09	FALSE	2282.96	2308.52	2522.38	2296.76	1235.76	1672.79	1571.18	1352.85
ENSDARG00000019541	2729.54	-0.536638	0.0838965	-6.39643	1.59056e-10	6.88802e-09	FALSE	3259.72	3530.97	3715.38	3729.28	2211.38	2735.6	2429.87	2443.73
ENSDARG00000079544	205.145	-2.11494	0.330851	-6.39241	1.63294e-10	7.05939e-09	FALSE	324.302	388.874	493.132	452.99	63.2962	194.044	56.8128	69.6403
ENSDARG00000009443	793.613	-2.56009	0.400583	-6.39092	1.64893e-10	7.11622e-09	FALSE	1072.5	1756.77	2076.94	2037.56	186.758	449.516	362.962	178.782
ENSDARG00000069265	1036.24	0.780154	0.122099	6.38952	1.66405e-10	7.16913e-09	FALSE	785.287	837.925	735.364	789.125	1626.29	1295.73	1081.56	1402.2
ENSDARG00000098458	17861.5	0.43879	0.0686857	6.38838	1.67655e-10	7.19824e-09	FALSE	16601	15729.5	15474	16038.7	23542.1	20358.8	23179.3	19456.6
ENSDARG00000105265	560.164	-2.15042	0.336603	-6.3886	1.67411e-10	7.19824e-09	FALSE	884.839	1043.91	1130.39	1076.66	94.225	405.599	191.139	240.679
ENSDARG00000045411	362.409	-0.929332	0.145478	-6.38811	1.67948e-10	7.19852e-09	FALSE	500.957	513.759	509.439	525.653	194.182	342.353	301.557	239.179
ENSDARG00000086703	58.0267	2.40588	0.376992	6.38178	1.75044e-10	7.48987e-09	FALSE	23.5964	21.3616	17.5626	21.5258	213.699	62.3337	97.3881	70.965
ENSDARG00000015128	16589.9	0.428031	0.0670893	6.38002	1.77062e-10	7.56189e-09	FALSE	15060	14483.1	14633.7	15365.8	21636.2	19691.7	21141.6	17644.3
ENSDARG00000025522	2039.61	1.09622	0.171828	6.37979	1.77331e-10	7.56189e-09	FALSE	1523.15	1448.98	1535.19	1374.36	3856.06	3096.9	3796.39	1825.64
ENSDARG00000038559	16717.2	0.712423	0.111721	6.37682	1.80797e-10	7.69661e-09	FALSE	15615.3	13740.4	12573.2	13410	28512.5	21317.4	21504.6	19336
ENSDARG00000021896	482.015	0.985063	0.154527	6.37469	1.83331e-10	7.79125e-09	FALSE	342.849	348.806	383.928	313.388	887.559	575.588	763.677	525.198
ENSDARG00000090352	1121.78	3.58539	0.562593	6.37298	1.85386e-10	7.86527e-09	FALSE	218.612	190.68	187.177	373.374	6597.47	2249.02	2148.14	652.007
ENSDARG00000051861	2184.35	-0.790778	0.124157	-6.3692	1.90014e-10	8.048e-09	FALSE	2787.63	2504.79	2575.64	3304.03	1494.67	1257.69	1892.41	1811.51
ENSDARG00000063914	9983.59	0.326727	0.0513105	6.36764	1.91959e-10	8.11665e-09	FALSE	8882.14	9151.33	8756.06	9176.47	11120.4	11081.3	12032.3	10877.9
ENSDARG00000053152	836.374	0.478494	0.0751958	6.3633	1.97461e-10	8.33524e-09	FALSE	734.862	676.476	732.128	695.615	1061.98	930.287	1019.09	942.821
ENSDARG00000037995	123.07	1.45456	0.228633	6.36199	1.99155e-10	8.39263e-09	FALSE	71.1065	82.9265	71.6166	66.921	230.764	181.147	231.144	159.41
ENSDARG00000102798	1611.71	-0.867139	0.136348	-6.35975	2.02079e-10	8.50155e-09	FALSE	1849.88	2305.27	1836.56	2027.4	1028.13	1262.08	789.22	1316.11
ENSDARG00000001807	1210.77	0.794287	0.124979	6.35539	2.07905e-10	8.73202e-09	FALSE	945.498	935.285	920.435	961.125	2106.48	1462.64	1658.94	1299.85
ENSDARG00000099355	2684.01	0.706673	0.111263	6.35135	2.1344e-10	8.94949e-09	FALSE	1946.57	2003.67	2332.05	2120.03	3620.17	2743.14	4081.07	3273.57
ENSDARG00000098386	1436.51	0.660961	0.10409	6.34992	2.15422e-10	9.0175e-09	FALSE	1124.18	1090.71	1168.06	1231.89	1896.41	1999.78	1943.56	1464.17
ENSDARG00000016081	1239.02	-0.760391	0.119762	-6.34917	2.16474e-10	9.04644e-09	FALSE	1836.23	1902.52	1920.74	1624.73	1072.14	1139.46	1249.61	840.881
ENSDARG00000039863	223.682	1.9181	0.302166	6.34784	2.18365e-10	9.1103e-09	FALSE	87.3265	109.503	136.246	112.654	682.47	294.109	512.995	200.5
ENSDARG00000012453	464.013	-0.653425	0.102977	-6.34536	2.21904e-10	9.24257e-09	FALSE	522.411	599.783	612.276	566.234	390.812	370.036	349.9	355.246
ENSDARG00000053831	636.615	-1.08015	0.170243	-6.34474	2.22803e-10	9.26461e-09	FALSE	884.073	926.065	1039.53	932.433	286.069	567.112	511.067	424.737
ENSDARG00000030602	17545.4	0.386415	0.0609182	6.34319	2.25061e-10	9.32758e-09	FALSE	16112.2	15262.9	16161	16257.6	22310.1	20390.9	21878.9	18813.2
ENSDARG00000069946	1736.19	-0.97549	0.153782	-6.34333	2.24849e-10	9.32758e-09	FALSE	2454.32	2187.23	2207.88	2726.73	1178.07	886.648	1440.68	1366.42
ENSDARG00000077688	177.411	-1.8099	0.285348	-6.34278	2.25658e-10	9.3369e-09	FALSE	266.01	363.316	361.481	276.81	37.3583	143.376	69.689	110.679
ENSDARG00000044056	654.182	0.524095	0.082669	6.33968	2.30236e-10	9.51059e-09	FALSE	527.806	567.884	548.026	514.777	826.592	755.739	772.32	750.53
ENSDARG00000053158	65.3789	1.64569	0.259772	6.33514	2.37132e-10	9.77935e-09	FALSE	52.4214	33.2738	26.4882	27.0486	89.2578	90.551	141.368	104.33
ENSDARG00000035860	14532	0.533561	0.0842382	6.33395	2.3896e-10	9.83857e-09	FALSE	12803	13219	11679.1	11905.1	19864.5	17319.1	19245.5	15375.2
ENSDARG00000022509	1157.63	0.570464	0.0900876	6.33233	2.41494e-10	9.92658e-09	FALSE	947.091	900.114	928.916	1038.84	1535.56	1457.86	1475.64	1203.33
ENSDARG00000042658	913.734	-0.66872	0.105667	-6.32853	2.47502e-10	1.01569e-08	FALSE	1012.41	1112.62	1184.09	1098.26	594.028	775.266	730.834	674.528
ENSDARG00000089177	164.983	-1.12024	0.177115	-6.32489	2.53407e-10	1.03822e-08	FALSE	242.373	232.663	302.644	215.099	101.196	91.0009	143.954	119.775
ENSDARG00000098092	340.169	1.14527	0.181166	6.32167	2.58752e-10	1.05839e-08	FALSE	173.803	226.266	150.166	232.17	324.783	490.249	549.148	370.625
ENSDARG00000071347	491.581	0.798444	0.12643	6.3153	2.69646e-10	1.10116e-08	FALSE	421.962	317.662	322.726	384.275	684.091	503.343	706.178	614.58
ENSDARG00000006413	11828.4	0.49014	0.0776177	6.3148	2.70508e-10	1.10288e-08	FALSE	10089.3	10192	10296.6	10701	15802.7	14079	15729.9	12377.3
ENSDARG00000095584	94.2967	1.11885	0.177333	6.3093	2.80306e-10	1.14097e-08	FALSE	52.3822	59.6203	61.9578	62.2718	109.267	123.336	146.598	136.22
ENSDARG00000010160	15058	0.435392	0.0690421	6.30618	2.86014e-10	1.16232e-08	FALSE	13828.5	12442	13229.8	14191	19343	17514.1	19327.5	16422.8
ENSDARG00000055129	1192.23	0.583581	0.0925471	6.30577	2.86757e-10	1.16345e-08	FALSE	1041.07	833.548	986.325	901.774	1462.67	1331.47	1542.57	1296.06
ENSDARG00000002271	2513.41	0.651759	0.103371	6.30505	2.88109e-10	1.16705e-08	FALSE	2057.47	2172.33	1874.15	2115.97	3314.95	3401.93	3659.17	2541.28
ENSDARG00000007344	2728.4	2.51787	0.399405	6.30405	2.8996e-10	1.17266e-08	FALSE	872.315	1365.81	1037.83	1122.95	9572.86	5584.68	7917.17	2123.4
ENSDARG00000010655	1689.77	0.387253	0.0614385	6.3031	2.91754e-10	1.17423e-08	FALSE	1518.49	1426.77	1452.82	1531.5	1877.1	1909.66	1956.23	2008.81
ENSDARG00000101043	7367.42	-1.03476	0.164166	-6.3031	2.91752e-10	1.17423e-08	FALSE	9942.98	9944.91	9537.84	8892.23	4239.44	2846.38	5660.15	5953.63
ENSDARG00000069984	11.7672	6.89886	1.09444	6.30353	2.90934e-10	1.17423e-08	FALSE	0	0	0	0	24.6649	22.9752	21.7826	25.4859
ENSDARG00000056410	1091.96	-0.508762	0.0807534	-6.30019	2.97272e-10	1.19452e-08	FALSE	1293.24	1356.87	1374.67	1352.61	931.063	970.907	1030.6	851.547
ENSDARG00000070775	377.262	-1.00527	0.1596	-6.29867	3.00215e-10	1.20442e-08	FALSE	545.054	622.73	748.345	566.174	229.034	339.479	385.581	283.489
ENSDARG00000042332	123.895	1.88729	0.299689	6.29751	3.02466e-10	1.21151e-08	FALSE	54.2449	67.1503	35.6423	48.6021	304.575	146.395	147.068	161.225
ENSDARG00000040463	578.046	0.735033	0.116748	6.29588	3.05662e-10	1.22094e-08	FALSE	482.19	379.523	328.408	428.956	737.961	618.571	663.384	659.485
ENSDARG00000030872	167.494	-0.970205	0.154103	-6.29581	3.05796e-10	1.22094e-08	FALSE	198.616	234.786	286.002	256.724	108.089	135.001	143.943	113.761
ENSDARG00000038666	200.738	2.00558	0.318915	6.28875	3.20037e-10	1.27577e-08	FALSE	61.4209	95.8565	152.804	95.06	325.869	478.45	587.747	242.508
ENSDARG00000040890	1651.92	0.585017	0.0930683	6.28589	3.25974e-10	1.29738e-08	FALSE	1498.26	1416.14	1346.61	1407.69	2284.78	1950.24	2439.66	1826.88
ENSDARG00000028067	1732.58	0.635598	0.101244	6.27791	3.43165e-10	1.36363e-08	FALSE	1301.36	1365.94	1415.68	1475.17	2318.88	2069.65	2459.69	1795.5
ENSDARG00000053291	9123.88	0.587546	0.0936141	6.27625	3.4684e-10	1.37606e-08	FALSE	7714.11	7143.89	7603.67	7807.01	13120.8	10130.6	12522.3	9713.63
ENSDARG00000041435	19938.9	0.467833	0.0745628	6.27434	3.51111e-10	1.3908e-08	FALSE	18081.7	17682.9	17470.6	17653.9	27892.1	23035	25410.3	21707.2
ENSDARG00000088493	107.835	4.28061	0.682384	6.27301	3.54124e-10	1.40052e-08	FALSE	3.47112	2.56277	28.83	8.6123	300.539	190.867	164.475	170.397
ENSDARG00000097795	316.669	0.761668	0.121478	6.27001	3.6102e-10	1.42331e-08	FALSE	215.385	241.56	280.285	244.212	394.162	390.616	495.791	389.772
ENSDARG00000036840	6655.11	-1.15189	0.183711	-6.27012	3.60777e-10	1.42331e-08	FALSE	7213.87	8714.13	8515.66	7886.86	1991.21	3634.48	3956.44	4965.48
ENSDARG00000041665	1392.75	0.675632	0.107781	6.26857	3.64381e-10	1.4331e-08	FALSE	1157.89	1074.29	1176.06	1075.35	1837.52	1983.75	1915.6	1426.59
ENSDARG00000099491	720.845	1.30104	0.207554	6.26845	3.64649e-10	1.4331e-08	FALSE	418.5	508.02	538.584	490.102	1563.61	898.4	1632.18	728.166
ENSDARG00000055124	2493	0.892207	0.142347	6.26784	3.66099e-10	1.43655e-08	FALSE	1965.77	1639.57	1977.66	1970.13	4729.75	3122.64	3527.15	2641.9
ENSDARG00000069245	8241.43	0.719191	0.114758	6.26705	3.67962e-10	1.43963e-08	FALSE	6854.21	6319.24	6331.74	6491.13	13706.8	10785.7	9556.32	8748.86
ENSDARG00000105307	118.881	1.41656	0.226035	6.26702	3.68033e-10	1.43963e-08	FALSE	96.0478	53.6805	56.8388	72.9919	250.025	142.75	195.78	151.707
ENSDARG00000104400	87.3493	-23.0533	3.6793	-6.26568	3.71211e-10	1.4498e-08	FALSE	0	0	0	258.258	0	0	0	0
ENSDARG00000011201	20589.8	0.388747	0.0620481	6.26526	3.72206e-10	1.45143e-08	FALSE	19414.1	18165	18926.1	18684.2	26677.8	23597	25735.7	22432.2
ENSDARG00000016866	258.751	-1.07155	0.171081	-6.26342	3.76629e-10	1.4664e-08	FALSE	316.654	449.186	359.419	366.884	118.19	183.132	204.638	203.359
ENSDARG00000103316	1278.01	0.510287	0.0814803	6.26271	3.78353e-10	1.47082e-08	FALSE	1050.43	989.972	958.957	1186.52	1587.16	1539.25	1450.35	1391.25
ENSDARG00000098766	3967.63	-0.552015	0.0881618	-6.26139	3.81567e-10	1.48102e-08	FALSE	4231.72	4706.52	4664.4	4774.28	2748.01	3492.12	2838.24	3458.11
ENSDARG00000061948	1063.21	1.1469	0.183225	6.25954	3.86122e-10	1.49639e-08	FALSE	750.143	733.009	797.038	793.636	1952.26	1398.81	2375.82	1082.76
ENSDARG00000105252	178.986	1.25908	0.201213	6.25744	3.9136e-10	1.51435e-08	FALSE	102.264	80.3947	117.433	82.2857	314.507	188.481	202.764	208.739
ENSDARG00000075827	192.053	-1.59066	0.25428	-6.25557	3.96071e-10	1.53021e-08	FALSE	318.675	286.199	293.734	323.51	48.6287	161.264	101.063	95.786
ENSDARG00000040565	169225	0.758351	0.121244	6.25477	3.98111e-10	1.53337e-08	FALSE	138652	133627	131139	137415	274061	226674	251053	163064
ENSDARG00000104829	181.749	-0.879036	0.140534	-6.25497	3.97594e-10	1.53337e-08	FALSE	237.416	274.792	309.614	273.773	135.1	154.133	169.231	139.201
ENSDARG00000039605	2866.77	-0.8507	0.136017	-6.25437	3.99128e-10	1.53493e-08	FALSE	3668.77	4061	4336.1	4508.46	1664.55	2985.83	2158.75	2383.01
ENSDARG00000031299	521.7	-0.739623	0.118316	-6.25126	4.07156e-10	1.5634e-08	FALSE	652.478	640.65	684.607	747.824	342.319	437.881	418.905	433.344
ENSDARG00000055365	96.6512	2.58041	0.413009	6.24784	4.16179e-10	1.59561e-08	FALSE	29.4809	25.7469	41.6803	45.7935	393.234	121.129	262.18	80.7236
ENSDARG00000010953	1338.51	0.480734	0.0769981	6.24346	4.28005e-10	1.63844e-08	FALSE	1211.64	1168.94	1200.24	1093.1	1802.82	1574.93	1643.95	1498.71
ENSDARG00000037190	126.034	1.28602	0.206011	6.24247	4.30716e-10	1.64631e-08	FALSE	69.8803	66.5534	50.9947	78.426	223.605	145.525	150.441	129.877
ENSDARG00000001933	235.562	0.856856	0.137269	6.24217	4.3153e-10	1.64691e-08	FALSE	157.549	201.642	175.194	185.129	304.404	333.009	393.957	277.221
ENSDARG00000031683	1067.34	1.16354	0.186546	6.2373	4.45189e-10	1.69646e-08	FALSE	642.821	711.754	644.432	711.652	2081.68	1080.12	1808.56	1105.02
ENSDARG00000035327	158248	0.661112	0.106048	6.23407	4.54472e-10	1.7292e-08	FALSE	135794	127970	132925	129497	203624	224563	245314	158557
ENSDARG00000018178	1210.6	-0.394845	0.0633718	-6.23061	4.64632e-10	1.76518e-08	FALSE	1364.17	1339.63	1390.68	1352.22	1048.42	980.043	1033.13	1078.76
ENSDARG00000087359	571.249	1.44391	0.231773	6.22984	4.66901e-10	1.77112e-08	FALSE	382.515	464.982	279.005	303.527	979.158	665.365	1521.22	721.39
ENSDARG00000057571	5187.4	-0.726037	0.116657	-6.22368	4.8562e-10	1.83884e-08	FALSE	6745.86	7040.9	6209.49	6345.74	3424.49	5132.44	3421.14	3946.55
ENSDARG00000091087	157.972	1.08936	0.17504	6.22349	4.8622e-10	1.83884e-08	FALSE	106.489	102.967	79.7198	92.1108	217.99	215.938	220.074	155.097
ENSDARG00000019253	4239.66	-0.39949	0.0641931	-6.22325	4.86976e-10	1.83892e-08	FALSE	4886.74	4919.25	5062.52	4893.34	3582.04	4006.76	3988.37	3409.32
ENSDARG00000102106	1053.85	-0.570092	0.091626	-6.22194	4.91038e-10	1.85147e-08	FALSE	1213.84	1310.18	1220.02	1331.63	896.897	909.932	761.932	852.808
ENSDARG00000007655	122.863	-2.25594	0.36267	-6.22036	4.96018e-10	1.86744e-08	FALSE	185.294	196.245	188.094	233.387	18.4281	82.5211	27.6245	39.7082
ENSDARG00000069017	206.761	-1.80599	0.290351	-6.22002	4.97098e-10	1.8687e-08	FALSE	226.771	341.547	360.954	266.552	40.1693	118.836	59.8274	122.499
ENSDARG00000052575	427.213	0.745928	0.120053	6.21333	5.18736e-10	1.94712e-08	FALSE	355.947	290.499	354.447	362.117	671.554	521.402	573.867	520.576
ENSDARG00000028017	993.419	0.564335	0.0908391	6.21247	5.21596e-10	1.95493e-08	FALSE	820.038	949.511	798.172	821.459	1316.47	1326.42	1263.41	1108.92
ENSDARG00000063223	125.956	2.00555	0.322917	6.21075	5.27328e-10	1.97346e-08	FALSE	69.0493	60.9595	66.7923	51.7983	464.509	139.961	247.543	145.089
ENSDARG00000059202	433.765	0.745385	0.120039	6.20951	5.31508e-10	1.98319e-08	FALSE	321.572	301.147	313.124	298.538	508.29	441.537	609.086	507.743
ENSDARG00000057598	728.85	0.783728	0.12621	6.20974	5.30734e-10	1.98319e-08	FALSE	552.49	635.913	583.544	633.816	1146.22	944.859	1245.11	812.253
ENSDARG00000074378	716.605	2.10364	0.338825	6.20864	5.34457e-10	1.99123e-08	FALSE	364.515	306.764	333.987	356	2490.23	1035.74	1654.05	670.548
ENSDARG00000038618	854.415	-0.925321	0.149124	-6.20505	5.46796e-10	2.03418e-08	FALSE	977.353	1212.97	1235.61	1119.49	442.679	743.88	519.989	686.745
ENSDARG00000022689	570.789	-1.06373	0.171729	-6.19425	5.85637e-10	2.17545e-08	FALSE	714.578	656.495	895.144	773.71	267.038	388.927	293.461	502.9
ENSDARG00000098995	140.088	2.11406	0.341325	6.19369	5.8773e-10	2.17999e-08	FALSE	83.6683	64.8625	71.1309	72.8904	222.443	397.337	519.525	125.675
ENSDARG00000058556	546.048	-2.05129	0.331246	-6.19265	5.91611e-10	2.19114e-08	FALSE	836.615	970.223	951.198	1044.42	171.38	121.056	210.419	413.094
ENSDARG00000099720	1760.21	0.6142	0.0991922	6.19202	5.93979e-10	2.19667e-08	FALSE	1403.73	1221.03	1450.32	1438.39	2546.51	1997.96	1991.74	1907.04
ENSDARG00000037789	325467	0.700014	0.113057	6.19169	5.95207e-10	2.19797e-08	FALSE	272713	267550	256675	266288	531243	426655	444506	324832
ENSDARG00000009922	1171.68	0.67913	0.109787	6.18592	6.17425e-10	2.27666e-08	FALSE	937.879	910.949	884.678	917.539	1856.45	1323.29	1262.41	1403.98
ENSDARG00000015312	396.254	1.06525	0.172293	6.18275	6.29931e-10	2.31937e-08	FALSE	265.301	296.117	274.234	303.23	829.367	463.285	640.455	454.375
ENSDARG00000103845	2590.96	0.82366	0.133266	6.18056	6.38766e-10	2.34845e-08	FALSE	1969.46	2000.89	2017.15	1969.29	4497.38	3516.51	3580.86	2492.18
ENSDARG00000088366	1045.95	-0.769465	0.124679	-6.17155	6.76227e-10	2.48253e-08	FALSE	1514.43	1616.23	1539.96	1510.97	709.91	1011.29	1108.31	797.406
ENSDARG00000010267	1081.81	-0.657529	0.106644	-6.16563	7.02043e-10	2.57354e-08	FALSE	1304.48	1563.9	1588.83	1618.9	833.614	1068.16	1071.6	882.973
ENSDARG00000021573	70.4373	-2.86225	0.464521	-6.16174	7.19497e-10	2.63367e-08	FALSE	109.445	146.922	151.663	162.6	0.98215	44.1147	16.2998	17.227
ENSDARG00000063026	432.791	0.923245	0.149897	6.15918	7.31218e-10	2.67267e-08	FALSE	304.548	297.234	348.709	347.339	781.098	554.055	673.149	459.037
ENSDARG00000071090	1093.44	0.677598	0.110059	6.15669	7.42797e-10	2.71105e-08	FALSE	869.25	806.505	893.578	865.842	1301.51	1593.58	1455.18	1147.45
ENSDARG00000005897	370.265	-0.721781	0.117454	-6.14521	7.98597e-10	2.91047e-08	FALSE	523.741	474.594	503.568	448.154	260.675	331.983	256.047	330.236
ENSDARG00000018404	7760.17	0.944454	0.153704	6.14461	8.01582e-10	2.91711e-08	FALSE	6172.67	6222.59	6488.07	5813.82	16200.6	9486.55	13280.9	8562.8
ENSDARG00000079901	38.7404	-3.24516	0.528194	-6.14388	8.05308e-10	2.92642e-08	FALSE	112.012	54.7741	89.1189	90.6973	0	16.6765	9.40183	10.8156
ENSDARG00000076144	505.408	1.50501	0.245119	6.13992	8.25638e-10	2.99595e-08	FALSE	283.511	335.537	311.314	307.461	1417.73	560.993	1034.7	502.473
ENSDARG00000025912	227.898	1.04602	0.170442	6.13708	8.40494e-10	3.04546e-08	FALSE	178.468	106.102	139.562	133.246	229.432	337.893	314.418	261.249
ENSDARG00000104011	12796.2	0.475712	0.0775453	6.13463	8.53556e-10	3.08668e-08	FALSE	11032.5	11236.6	10863.5	11309.7	16957.7	14228.8	16933.1	13687.3
ENSDARG00000101407	102.103	-1.25687	0.204886	-6.13449	8.54332e-10	3.08668e-08	FALSE	137.057	125.516	171.103	196.781	54.9722	77.8154	59.7829	71.963
ENSDARG00000019181	55452.4	0.553052	0.0902172	6.13023	8.77507e-10	3.16585e-08	FALSE	48223.1	46525.1	47110.2	48445.6	84880.2	65474.8	68816.8	60043.8
ENSDARG00000029018	994.595	0.552192	0.0900842	6.12974	8.80234e-10	3.17112e-08	FALSE	785.869	917.362	759.784	754.839	1326.83	1108.65	1122.27	1160.59
ENSDARG00000093244	961.377	0.86279	0.14077	6.12909	8.83842e-10	3.17955e-08	FALSE	734.798	701.338	698.352	727.327	1615.18	1161.8	1498.48	931.434
ENSDARG00000074852	528.631	-0.874771	0.142734	-6.12867	8.86144e-10	3.18326e-08	FALSE	669.557	762.996	704.041	817.046	313.638	453.725	443.613	400.828
ENSDARG00000043587	419.876	-1.19203	0.194558	-6.12683	8.96451e-10	3.21504e-08	FALSE	561.73	651.891	650.05	734.872	167.374	384.633	337.201	248.885
ENSDARG00000097889	22.4263	-3.52891	0.575994	-6.12664	8.97553e-10	3.21504e-08	FALSE	67.1617	55.754	50.2737	38.8614	4.91235	3.83185	1.81076	7.48613
ENSDARG00000015355	123.032	3.67435	0.599895	6.125	9.06836e-10	3.24365e-08	FALSE	27.5256	26.5798	15.6556	26.901	522.873	126.765	499.055	83.6961
ENSDARG00000077764	207.756	-1.12985	0.18451	-6.1235	9.15446e-10	3.26979e-08	FALSE	285.806	296.077	297.023	258.184	95.2253	159.442	96.0119	167.148
ENSDARG00000004256	89.9639	1.80959	0.295678	6.12013	9.34973e-10	3.33478e-08	FALSE	59.8112	41.8298	28.5438	37.0263	217.995	100.763	117.733	142.354
ENSDARG00000030107	2470.95	0.522078	0.0853111	6.1197	9.37529e-10	3.33915e-08	FALSE	1961.54	2056.59	1859.91	2122.82	3379.77	2783.64	2692.86	2645.04
ENSDARG00000090286	3573.93	-1.68967	0.276268	-6.11606	9.59149e-10	3.4113e-08	FALSE	4957.15	5739.65	7317.01	7280.77	1241.15	3163	1718.09	1720.37
ENSDARG00000075045	231.822	3.71187	0.607112	6.11399	9.71729e-10	3.45115e-08	FALSE	33.7552	40.657	53.7319	53.5669	1469.53	319.377	456.401	141.513
ENSDARG00000095533	247.399	1.96547	0.321493	6.11358	9.7421e-10	3.45507e-08	FALSE	127.745	84.544	143.167	121.915	774.104	270.721	610.428	210.044
ENSDARG00000016200	1069.83	1.0142	0.165925	6.11242	9.81334e-10	3.47542e-08	FALSE	816.834	792.66	688.836	823.52	2022.69	1332.32	1901.02	1050.55
ENSDARG00000104450	73.0681	-1.72537	0.282344	-6.11088	9.90855e-10	3.50419e-08	FALSE	137.222	153.938	149.103	106.353	26.7355	46.7078	58.5144	33.2913
ENSDARG00000058270	811.642	-0.613925	0.100586	-6.10347	1.03789e-09	3.66536e-08	FALSE	986.931	1038.07	984.362	845.461	562.891	576.473	640.76	732.81
ENSDARG00000031240	1244.05	0.759985	0.124533	6.10267	1.04309e-09	3.67855e-08	FALSE	807.219	828.387	1004.52	1054.36	1564.64	1665.78	1821.67	1214.63
ENSDARG00000096579	39.0234	3.54893	0.581747	6.10048	1.05753e-09	3.72001e-08	FALSE	8.85673	4.27847	11.0997	2.75465	149.582	82.1925	62.9341	17.0266
ENSDARG00000097976	16.1438	6.71571	1.10086	6.10043	1.05782e-09	3.72001e-08	FALSE	0	0	0	0	23.9602	26.355	11.7904	21.6294
ENSDARG00000034273	869.662	-0.860548	0.141126	-6.09773	1.07586e-09	3.77288e-08	FALSE	1146.25	1222.25	1481.88	1481.39	705.459	728.848	947.9	558.407
ENSDARG00000019001	141.895	1.30614	0.214196	6.09787	1.07492e-09	3.77288e-08	FALSE	108.484	78.8402	103.198	85.2167	308.131	163.046	183.243	266.965
ENSDARG00000039730	2912.48	-1.75006	0.28717	-6.09417	1.1001e-09	3.85248e-08	FALSE	4069.41	6116.15	5448.7	5692.21	886.813	2430.29	1702.35	1321.31
ENSDARG00000093640	273.282	-1.37744	0.226126	-6.09146	1.11885e-09	3.91269e-08	FALSE	422.607	412.892	552.802	607.94	139.666	257.237	229.026	144.154
ENSDARG00000041068	2815.05	-0.609774	0.100121	-6.09039	1.12636e-09	3.93348e-08	FALSE	3137.9	3444.21	3665.19	3497.45	2232.68	2694.14	1919.66	2165.01
ENSDARG00000030961	87.5285	1.14528	0.188091	6.08895	1.13655e-09	3.9627e-08	FALSE	53.9224	52.5765	56.9857	59.5508	144.26	99.0484	127.739	123.744
ENSDARG00000052895	33.2504	3.22258	0.529268	6.08876	1.13789e-09	3.9627e-08	FALSE	7.16978	7.95947	7.25754	11.8356	119.035	66.7705	117.176	22.6977
ENSDARG00000096756	98.986	1.99247	0.327609	6.08187	1.18793e-09	4.13121e-08	FALSE	58.9853	49.1417	47.2493	21.9404	294.821	132.961	144.238	127.362
ENSDARG00000095556	3486.11	0.945562	0.155544	6.07908	1.20873e-09	4.19776e-08	FALSE	2530.63	2729.05	2509.44	2781.11	6421.58	4400.15	6123.08	3379.19
ENSDARG00000078619	2310.37	-0.916733	0.150902	-6.07502	1.23974e-09	4.29946e-08	FALSE	2731.71	2464.97	2855.55	4047.44	1731.77	1302.9	1698.83	1677.43
ENSDARG00000068114	57.186	-1.83245	0.301681	-6.07412	1.24667e-09	4.31753e-08	FALSE	105.507	93.1239	81.13	104.644	12.633	25.4381	28.5987	39.8501
ENSDARG00000101951	352.539	0.723202	0.119118	6.07133	1.26857e-09	4.38388e-08	FALSE	253.304	237.719	287.297	289.03	527.522	401.15	434.265	405.41
ENSDARG00000093546	43.5142	3.04068	0.500834	6.07123	1.26932e-09	4.38388e-08	FALSE	12.822	11.0029	14.2625	12.8881	191.016	50.9643	145.678	32.3253
ENSDARG00000044093	30404.3	0.42137	0.0694079	6.07092	1.27177e-09	4.38628e-08	FALSE	27769.1	26679.6	26538.9	27260.5	39724.3	34650.4	38533.8	32060
ENSDARG00000041811	27897.6	0.463877	0.0764139	6.07059	1.27444e-09	4.38947e-08	FALSE	25157.4	24315.9	24420.2	24782.7	37484.7	32099.7	36878.4	29638.6
ENSDARG00000089874	109.25	1.64069	0.270315	6.06954	1.28279e-09	4.41216e-08	FALSE	32.032	50.4496	37.2727	31.5537	86.3097	91.5344	114.186	178.656
ENSDARG00000060127	555.49	0.661422	0.108991	6.06862	1.29017e-09	4.43145e-08	FALSE	501.472	470.466	505.572	402.383	685.838	727.131	834.211	720.318
ENSDARG00000052470	1171.83	-0.66648	0.109838	-6.06786	1.29627e-09	4.44635e-08	FALSE	1259.12	1432.19	1511.42	1451.11	711.506	975.242	850.927	1024.39
ENSDARG00000004452	6250.46	0.318046	0.0525277	6.05482	1.40576e-09	4.81532e-08	FALSE	5511.49	5482.78	5310.71	5363.76	7123.76	6626.31	6463.43	6795.61
ENSDARG00000104906	626.147	-0.991802	0.163836	-6.05363	1.41617e-09	4.84435e-08	FALSE	776.383	946.569	837.325	776.52	280.582	572.775	396.873	427.691
ENSDARG00000053457	22954	0.46438	0.0767201	6.05292	1.42247e-09	4.85927e-08	FALSE	20502.5	19775.9	20147.4	19585	30621.2	26007.8	29621.6	24143.9
ENSDARG00000079059	134.796	1.15638	0.191129	6.05024	1.44633e-09	4.93407e-08	FALSE	90.5809	92.1843	91.7827	94.0445	208.366	210.468	254.356	150.375
ENSDARG00000101128	1212.52	0.804699	0.133099	6.04588	1.486e-09	5.06248e-08	FALSE	1030.21	842.726	825.009	985.987	1704.63	1785.54	1756.36	1187.24
ENSDARG00000041569	3893.69	-1.57824	0.26109	-6.04483	1.49571e-09	5.08866e-08	FALSE	5701.76	6235.04	7898.51	8594.9	1737.29	3596.48	2487.57	1701
ENSDARG00000091419	1725.11	0.732424	0.121232	6.0415	1.52691e-09	5.17946e-08	FALSE	1326.25	1345.03	1368	1393.62	2733.26	2044.14	2507.66	1746.23
ENSDARG00000024195	1703.77	0.757452	0.125377	6.04138	1.52802e-09	5.17946e-08	FALSE	1296.97	1228.44	1368.31	1334.99	2899.24	2063.08	2133.74	1748.77
ENSDARG00000101264	80.8917	-1.36559	0.226042	-6.04132	1.5286e-09	5.17946e-08	FALSE	115.508	123.081	111.305	97.4225	26.2376	47.4398	51.9644	47.0496
ENSDARG00000091471	56.1134	1.83298	0.303475	6.03995	1.5416e-09	5.21647e-08	FALSE	22.5287	38.3405	19.8362	29.7041	148.343	75.0901	82.827	89.515
ENSDARG00000038056	941.976	1.05031	0.173997	6.03638	1.57606e-09	5.32588e-08	FALSE	781.845	689.704	747.028	559.908	1678.98	984.781	1879.58	1206.43
ENSDARG00000090722	657.997	-1.19994	0.198889	-6.03323	1.60713e-09	5.42358e-08	FALSE	903.123	817.24	1141.78	996.361	304.055	668.007	365.457	343.506
ENSDARG00000093478	22.2411	-2.26217	0.374989	-6.03264	1.61303e-09	5.43617e-08	FALSE	51.1801	42.8608	47.4482	38.0096	6.88381	14.3234	6.33433	9.71723
ENSDARG00000011376	196.738	-1.20723	0.200207	-6.0299	1.64057e-09	5.52156e-08	FALSE	214.935	365.676	221.326	342.621	105.692	117.47	156.736	116.675
ENSDARG00000078683	336.94	1.05595	0.17516	6.02848	1.65504e-09	5.56281e-08	FALSE	225.68	256.541	227.56	243.414	647.323	438.401	557.335	342.298
ENSDARG00000057456	1224.8	-0.409224	0.0679078	-6.02616	1.679e-09	5.63576e-08	FALSE	1485.17	1374.92	1324.94	1300.51	980.073	1025.02	1024.31	1089.56
ENSDARG00000104106	121.965	-1.23762	0.205601	-6.01951	1.74949e-09	5.86452e-08	FALSE	187.23	223.277	197.899	175.392	49.4543	96.5239	102.796	82.9656
ENSDARG00000086420	18.7922	6.86834	1.14106	6.01924	1.75239e-09	5.86641e-08	FALSE	0	0	0	0.902713	40.26	15.4154	47.1593	50.3164
ENSDARG00000027009	1616.86	-0.500227	0.0831579	-6.01539	1.7945e-09	5.99939e-08	FALSE	1896.89	1801.67	2069.62	1953.72	1273.03	1554.63	1290.66	1343.28
ENSDARG00000062549	290.736	-1.03169	0.171534	-6.0145	1.80443e-09	6.02454e-08	FALSE	371.62	452.733	438.83	398.143	163.037	250.536	151.807	246.514
ENSDARG00000018569	902.538	1.14207	0.189983	6.01142	1.83901e-09	6.13182e-08	FALSE	679.25	594.394	670.285	639.82	2021.82	947.824	1693.11	1040.02
ENSDARG00000036895	1779.63	0.781131	0.130038	6.00695	1.89046e-09	6.27833e-08	FALSE	1384.69	1225.49	1518.73	1388.06	2975.48	1896.11	2616.9	1995.47
ENSDARG00000093646	312.039	1.03532	0.172351	6.00708	1.88897e-09	6.27833e-08	FALSE	242.462	216.204	254.751	206.564	450.715	529.271	590.787	314.937
ENSDARG00000103980	681.732	1.27426	0.212122	6.00718	1.88782e-09	6.27833e-08	FALSE	463.385	467.185	432.059	495.109	1708.74	789.256	1291.82	705.991
ENSDARG00000044169	301.403	0.644873	0.107387	6.00512	1.91188e-09	6.34107e-08	FALSE	250.642	254.776	250.167	210.397	375.218	341.131	404.163	384.805
ENSDARG00000104834	84.758	-1.41456	0.235678	-6.00211	1.94774e-09	6.45147e-08	FALSE	117.899	148.147	105.874	122.575	27.4569	66.5262	41.6912	49.5583
ENSDARG00000021975	1728.55	0.736509	0.122731	6.00102	1.96087e-09	6.4864e-08	FALSE	1335.92	1337.93	1444.97	1404.53	2906.66	2066.08	2453.31	1781.98
ENSDARG00000078246	43.7696	8.22291	1.37037	6.00051	1.96696e-09	6.49797e-08	FALSE	0	0	0	0	1.96746	48.1731	91.7051	95.7105
ENSDARG00000056477	296.968	1.31798	0.219763	5.99725	2.00682e-09	6.62092e-08	FALSE	158.73	180.972	225.014	181.417	379.482	329.53	743.925	410.552
ENSDARG00000006427	10597.4	-1.13318	0.189004	-5.99557	2.02768e-09	6.68097e-08	FALSE	14583.7	17199.4	20571.1	18834.9	4977.59	11112.5	9647.8	6719.44
ENSDARG00000008880	1421.86	0.879199	0.146648	5.99531	2.03101e-09	6.68313e-08	FALSE	1119.03	1000.63	1125.87	1033.55	2338.38	1788.47	2381.13	1363.94
ENSDARG00000076799	2969.68	0.362782	0.0605264	5.99378	2.05016e-09	6.73733e-08	FALSE	2652.19	2701.52	2534.88	2625.24	3637.95	3137.57	3311.36	3430.14
ENSDARG00000097605	157.544	1.12717	0.188238	5.98799	2.12447e-09	6.96862e-08	FALSE	119.926	96.4308	113.709	105.898	302.916	211.918	251.55	185.347
ENSDARG00000055388	330.535	-1.22649	0.20483	-5.98787	2.12611e-09	6.96862e-08	FALSE	464.295	487.846	474.157	554.909	136.564	334.324	181.981	194.638
ENSDARG00000007745	6378.13	-0.397075	0.0663721	-5.98255	2.19667e-09	7.1905e-08	FALSE	7370.07	7290.68	7642.82	7204.02	5543.12	6243.23	5107.04	5516.21
ENSDARG00000101251	15859.5	-0.422638	0.0706942	-5.9784	2.25344e-09	7.36671e-08	FALSE	18793.3	19507.8	18160.4	18333.9	12897.4	13963.7	15719.8	13219.9
ENSDARG00000009743	108.198	1.54735	0.258887	5.97692	2.27395e-09	7.4241e-08	FALSE	59.8068	52.5569	63.9689	74.9507	287.701	116.135	183.85	149.857
ENSDARG00000090721	1075.11	0.486439	0.0813904	5.97662	2.27821e-09	7.42834e-08	FALSE	794.426	888.973	894.171	1011.5	1300.27	1176.56	1287.82	1276.76
ENSDARG00000063525	495.558	-0.676978	0.113336	-5.97317	2.32681e-09	7.57693e-08	FALSE	644.757	588.174	566.796	515.716	347.397	389.06	316.917	390.853
ENSDARG00000043684	475.452	-0.748782	0.125547	-5.96414	2.45923e-09	7.99775e-08	FALSE	622.37	746.309	707.056	522.487	348.441	396.399	375.285	424.008
ENSDARG00000039335	3854.98	0.457669	0.0767642	5.96201	2.4915e-09	8.08173e-08	FALSE	3299.06	3276.76	3257.14	3481.93	5092.79	4141.7	4895.06	4161.3
ENSDARG00000093774	871.218	-2.44018	0.409285	-5.96205	2.49094e-09	8.08173e-08	FALSE	1230.11	1443.21	1884.29	1828.86	97.5861	490.709	202.429	385.733
ENSDARG00000060889	108.326	-1.11946	0.187893	-5.95799	2.55364e-09	8.27262e-08	FALSE	149.892	177.511	182.523	137.253	63.1286	68.9961	90.3354	75.1285
ENSDARG00000053517	1331.85	0.442458	0.0742934	5.95554	2.5921e-09	8.38636e-08	FALSE	1086.82	1054.06	1143.95	1171.95	1517.03	1683.62	1419.46	1445.89
ENSDARG00000043796	347.991	1.50349	0.252531	5.9537	2.62148e-09	8.47049e-08	FALSE	213.258	227.605	236.816	185.169	838.659	306.228	831.357	470.141
ENSDARG00000070107	1302.32	0.508483	0.0854296	5.95206	2.64782e-09	8.52275e-08	FALSE	1185.96	1070.42	1058.25	1077.69	1707.94	1423.85	1658.73	1452.57
ENSDARG00000099195	711.749	1.05879	0.177887	5.95206	2.64785e-09	8.52275e-08	FALSE	451.478	566.583	473.433	444.819	1271.07	690.738	1266.13	807.931
ENSDARG00000095698	210.312	1.60666	0.269918	5.95242	2.6421e-09	8.52275e-08	FALSE	124.723	136.672	128.326	113.397	636.242	318.906	389.923	188.549
ENSDARG00000061543	2767.35	0.30379	0.0510637	5.94924	2.69397e-09	8.66009e-08	FALSE	2458.59	2411.35	2434.51	2516.82	3164.42	3065.56	2946.48	2951.54
ENSDARG00000060263	350.14	1.04733	0.176314	5.94011	2.84839e-09	9.14474e-08	FALSE	260.981	264.982	254.67	243.711	565.415	381.423	727.368	442.29
ENSDARG00000055252	122.582	2.01233	0.338879	5.9382	2.88164e-09	9.23966e-08	FALSE	59.5139	66.6195	55.5071	71.8803	414.85	234.024	278.693	97.9631
ENSDARG00000087452	809.27	0.400756	0.0674956	5.93752	2.89374e-09	9.26662e-08	FALSE	654.044	681.937	637.693	696.744	892.037	879.558	867.38	889.424
ENSDARG00000011961	487.216	0.848204	0.142884	5.93633	2.91478e-09	9.32208e-08	FALSE	333.13	447.413	387.793	346.557	634.8	618.302	885.313	590.42
ENSDARG00000102379	1551.43	0.547674	0.0922678	5.93571	2.9258e-09	9.34541e-08	FALSE	1106.33	1251.68	1256.99	1478.24	1945.64	1869.08	1931.32	1714.09
ENSDARG00000004297	3809.5	0.313348	0.0527946	5.93524	2.93424e-09	9.36046e-08	FALSE	3441.32	3381.38	3385	3391.74	4553.69	4183.66	4082.59	4080.18
ENSDARG00000041797	532.789	-0.81363	0.137229	-5.92901	3.04764e-09	9.70986e-08	FALSE	698.236	800.376	837.444	877.199	379.84	583.434	490.08	378.647
ENSDARG00000037064	422.528	-0.637542	0.107543	-5.92826	3.06157e-09	9.74185e-08	FALSE	502.639	496.854	592.134	549.345	296.315	376.236	369.664	336.083
ENSDARG00000079932	1554.58	-0.372289	0.0628066	-5.92754	3.07512e-09	9.76018e-08	FALSE	1823.06	1988.17	1845.91	1972.43	1407.61	1540.95	1510.73	1437.62
ENSDARG00000019532	520.4	1.20379	0.203077	5.92773	3.07151e-09	9.76018e-08	FALSE	369.921	446.561	434.405	328.275	1051.55	780.27	1261.85	545.784
ENSDARG00000102237	29.7368	3.04264	0.513573	5.92445	3.13342e-09	9.93267e-08	FALSE	3.75546	2.09189	8.27137	11.7	76.8082	91.7799	32.4506	30.5837
ENSDARG00000087318	84.9335	2.28524	0.385905	5.92176	3.18507e-09	1.00836e-07	FALSE	36.6089	29.9852	37.6591	24.4653	207.678	47.6047	246.014	123.909
ENSDARG00000035028	304.507	-1.05575	0.178298	-5.92126	3.19477e-09	1.01016e-07	FALSE	417.093	429.18	388.062	493.712	150.609	178.312	265.336	235.714
ENSDARG00000042751	1211.45	0.72123	0.121838	5.91956	3.22806e-09	1.0194e-07	FALSE	1101.01	976.715	900.213	995.15	1844.24	1458.57	1927.47	1316.64
ENSDARG00000100275	280.569	1.14373	0.193266	5.91791	3.26068e-09	1.02841e-07	FALSE	199.005	162.826	217.734	200.122	580.446	328.979	481.298	333.903
ENSDARG00000092404	34.0432	-2.23111	0.377184	-5.91516	3.31558e-09	1.04441e-07	FALSE	63.0261	57.1119	85.8079	92.2521	28.9592	14.2669	11.6072	9.62125
ENSDARG00000077004	2499.24	-0.716723	0.121219	-5.91261	3.36727e-09	1.05936e-07	FALSE	3223.75	3336.91	3427.66	3499.66	1674.82	1799.12	2673.66	2058.87
ENSDARG00000043970	2830.36	-0.338932	0.057335	-5.91144	3.39132e-09	1.06559e-07	FALSE	3098.36	3343.82	3128.56	3118.51	2459.38	2661.66	2500.19	2414.83
ENSDARG00000056167	2906.11	-0.44501	0.0752963	-5.91012	3.41862e-09	1.07282e-07	FALSE	3397.89	3758.3	3536.55	3220.88	2659.35	2666.72	2365.03	2530.08
ENSDARG00000099148	2105.77	1.01452	0.171707	5.90842	3.45412e-09	1.08261e-07	FALSE	1587.86	1650.44	1490.84	1594.7	4298.94	2844.69	3694.84	1940.94
ENSDARG00000030616	606.498	1.12409	0.190319	5.90635	3.49766e-09	1.09489e-07	FALSE	410.614	427.202	421.812	466.117	884.705	885.371	1391.95	602.742
ENSDARG00000055120	3545.62	1.00748	0.170686	5.90255	3.57929e-09	1.11904e-07	FALSE	2615.18	2597.36	2492.15	2711.65	6480.35	4035.91	6972.27	3454.78
ENSDARG00000104028	1327.74	-0.431326	0.0730821	-5.90195	3.5924e-09	1.12174e-07	FALSE	1643.1	1560.81	1542.6	1465.46	1138.04	1252.47	1065.82	1147.26
ENSDARG00000090361	29.5178	-2.56048	0.434029	-5.89934	3.64956e-09	1.13817e-07	FALSE	88.9979	61.1329	33.4722	74.0603	14.7305	7.67527	16.3009	5.24402
ENSDARG00000075385	590.408	0.522403	0.0885668	5.89841	3.67023e-09	1.1432e-07	FALSE	480.886	428.683	486.954	484.89	696.064	744.528	642.577	622.166
ENSDARG00000031776	7148.83	0.74188	0.125818	5.89646	3.71388e-09	1.15536e-07	FALSE	6398.91	5450.59	6052.51	5808.13	12575.1	8282.85	10697.2	8095.85
ENSDARG00000057074	1007.79	0.502191	0.0851951	5.8946	3.75599e-09	1.16701e-07	FALSE	831.347	807.277	886.212	878.128	1203.43	1184.8	1350.21	1087.05
ENSDARG00000058476	456.249	0.977175	0.165806	5.89349	3.78124e-09	1.17195e-07	FALSE	326.57	351.247	326.083	441.305	892.75	589.275	806.765	562.784
ENSDARG00000026403	616.124	1.30552	0.221518	5.89352	3.78051e-09	1.17195e-07	FALSE	225.611	476.646	281.352	408.284	978.645	588.124	1140.16	741.118
ENSDARG00000036894	1346.43	0.679058	0.115227	5.89324	3.78691e-09	1.17226e-07	FALSE	1156.6	1087.02	1207.65	1165.1	2070.47	1775.18	2129.83	1419.78
ENSDARG00000054172	2019.12	-0.409526	0.0695074	-5.89184	3.81922e-09	1.17935e-07	FALSE	2321.61	2471.8	2581.85	2487.47	1753.92	1820.83	2023.56	1830.9
ENSDARG00000074085	75.3379	1.50846	0.256025	5.89186	3.81863e-09	1.17935e-07	FALSE	24.8525	45.0086	25.6892	40.7153	68.8272	112.738	104.978	104.674
ENSDARG00000104919	213.819	3.66948	0.623246	5.8877	3.91617e-09	1.2078e-07	FALSE	33.3512	22.446	74.2471	44.8922	1379	151.643	357.059	343.752
ENSDARG00000089310	742.061	-2.5497	0.433461	-5.8822	4.04858e-09	1.2471e-07	FALSE	1170.74	1282.86	1447.9	1747.7	70.7841	473.141	224.453	196.679
ENSDARG00000054818	24692.6	0.432406	0.0735437	5.87958	4.11301e-09	1.26539e-07	FALSE	22268	20993.6	22394.6	22786	33003.6	26797.8	31866.5	27687.3
ENSDARG00000013880	285.835	0.940515	0.159973	5.87922	4.12195e-09	1.26659e-07	FALSE	196.65	235.03	219.893	202.026	505.25	341.723	476.606	318.134
ENSDARG00000061478	9475.59	0.443449	0.0754308	5.87889	4.13038e-09	1.26763e-07	FALSE	8227.63	8167.47	7502.47	8047.94	10839.7	10246.1	12015.6	10336.3
ENSDARG00000037071	6789.42	0.441277	0.0750664	5.87849	4.14033e-09	1.26913e-07	FALSE	6088.58	6449.62	5694.56	5956.21	9159.7	7873.02	8452.78	7360.93
ENSDARG00000033539	2314.33	-0.548159	0.0932662	-5.87736	4.16855e-09	1.27622e-07	FALSE	2989.67	2832.55	2583.42	2701.33	1762.17	1743.41	2187.61	1899.36
ENSDARG00000096655	1266.47	1.02067	0.173852	5.87093	4.33356e-09	1.32512e-07	FALSE	924.244	986.4	929.644	997.783	2820.74	1891.8	1722.01	1356.43
ENSDARG00000092532	74.674	-2.41201	0.41104	-5.86806	4.40919e-09	1.3466e-07	FALSE	173.811	165.608	136.316	155.903	13.8344	59.2044	28.8751	17.0609
ENSDARG00000027381	18.1575	6.48636	1.10611	5.86415	4.51446e-09	1.37708e-07	FALSE	0	0	0	0	23.5629	16.4044	18.1462	13.5294
ENSDARG00000095302	83.807	1.91504	0.326625	5.86311	4.54266e-09	1.38399e-07	FALSE	27.2923	22.8283	48.124	29.1383	144.196	144.545	124.786	74.5723
ENSDARG00000077967	3832.56	0.4866	0.0830121	5.86179	4.57894e-09	1.39335e-07	FALSE	3382.43	3268.53	3299.31	3214.79	5152.86	5033.19	4240.57	4021.21
ENSDARG00000032639	1236.58	-1.07093	0.182756	-5.85986	4.6325e-09	1.40794e-07	FALSE	1694.97	1876.4	2309.3	2180.6	575.698	1152.62	1247.65	862.471
ENSDARG00000095901	303.325	-1.09892	0.187674	-5.85546	4.7568e-09	1.44397e-07	FALSE	341.443	350.576	423.152	512.64	165.141	274.12	157.098	164.52
ENSDARG00000020298	2150.17	0.732569	0.125147	5.85367	4.80852e-09	1.45791e-07	FALSE	1456.04	1724.6	1595.8	1476.67	2898.93	2359.25	3044.66	2091.64
ENSDARG00000089787	1925.5	0.498474	0.0851931	5.8511	4.88327e-09	1.47741e-07	FALSE	1626.56	1667.5	1697.05	1668.9	2698.32	2178.14	2424.36	2111.98
ENSDARG00000061585	207.933	-1.09868	0.187775	-5.85106	4.88462e-09	1.47741e-07	FALSE	246.381	339.017	361.792	336.657	99.1387	149.905	192.038	158.938
ENSDARG00000029368	2654.37	0.421483	0.0720831	5.84718	4.99974e-09	1.5104e-07	FALSE	2314.42	2297.69	2297.48	2330.28	3409.17	3215.57	2933.62	2821.38
ENSDARG00000091111	415.465	1.15304	0.197223	5.84637	5.02404e-09	1.51592e-07	FALSE	309.455	288.961	264.35	304.873	906.369	614.988	685.218	391.287
ENSDARG00000079456	120.477	1.29677	0.221859	5.84501	5.06524e-09	1.52468e-07	FALSE	66.2165	63.0639	63.8017	77.1363	198.553	155.499	145.417	165.73
ENSDARG00000053774	257.546	-1.58832	0.271738	-5.84505	5.06431e-09	1.52468e-07	FALSE	440.843	374.28	439.867	534.905	70.4132	203.366	127.331	193.289
ENSDARG00000018985	1574.99	0.516141	0.0883247	5.84368	5.10602e-09	1.53511e-07	FALSE	1275.66	1298.72	1379.5	1442.67	1740.1	1965.87	2175.75	1842.56
ENSDARG00000068716	828.994	0.452771	0.0774867	5.84321	5.12052e-09	1.53763e-07	FALSE	759.484	659.56	669.533	635.259	959.434	902.955	906.143	946.786
ENSDARG00000007421	844.788	-0.762709	0.130573	-5.84126	5.18065e-09	1.55197e-07	FALSE	1003.64	1179.13	1384.5	1269.54	682.083	855.358	763.082	555.895
ENSDARG00000001621	468.381	0.87539	0.149862	5.84131	5.17914e-09	1.55197e-07	FALSE	427.262	353.709	326.331	341.344	839.254	520.548	735.037	556.813
ENSDARG00000104478	1399.12	-0.694559	0.118921	-5.84052	5.20392e-09	1.55708e-07	FALSE	1936.34	1818.48	1590.52	1973.98	1132.46	1430.85	965.199	997.219
ENSDARG00000037555	661.422	0.536874	0.0919676	5.83763	5.29471e-09	1.58235e-07	FALSE	587.973	584.515	530.638	519.328	788.574	738.736	894.736	795.589
ENSDARG00000002593	874.209	0.624021	0.106912	5.83676	5.3227e-09	1.58883e-07	FALSE	855.952	695.731	688.597	735.034	1106.55	1033.67	1374.17	1062.58
ENSDARG00000104795	88.0925	2.78942	0.477986	5.83577	5.35426e-09	1.59635e-07	FALSE	26.5676	24.5983	37.3197	23.8695	486.33	103.659	115.108	73.28
ENSDARG00000059815	796.356	0.937339	0.160679	5.83363	5.42359e-09	1.6151e-07	FALSE	639.669	618.252	648.534	698.26	1135.67	1586.3	1430.37	839.346
ENSDARG00000057452	1959.5	0.353112	0.0605864	5.82823	5.60194e-09	1.66623e-07	FALSE	1784.76	1718.11	1743.84	1786.19	2215.24	2176.24	2405.95	2185.01
ENSDARG00000062978	119.076	1.26559	0.217208	5.82663	5.65576e-09	1.68024e-07	FALSE	87.6057	60.0418	90.6964	69.5916	254.466	150.388	193.749	140.734
ENSDARG00000098746	1215.07	-1.02311	0.175626	-5.82549	5.69458e-09	1.68977e-07	FALSE	1716.57	1932.63	2100.69	1792.41	585.631	941.066	1265.72	918.502
ENSDARG00000096762	66.398	2.42424	0.416159	5.82527	5.70198e-09	1.68997e-07	FALSE	31.9862	25.7763	25.4371	27.9121	216.564	86.0102	239.361	53.3712
ENSDARG00000045269	348.203	0.762332	0.1309	5.82378	5.75314e-09	1.70312e-07	FALSE	282.532	286.435	286.028	241.241	388.019	506.919	508.303	453.065
ENSDARG00000026395	474.543	0.689827	0.118476	5.82249	5.79759e-09	1.71425e-07	FALSE	394.29	382.99	351.396	358.178	746.316	523.087	550.631	576.098
ENSDARG00000063019	468.638	0.870664	0.149551	5.82186	5.81963e-09	1.71875e-07	FALSE	409.183	314.453	308.16	401.949	781.811	680.786	664.014	492.126
ENSDARG00000021864	49338.9	0.560535	0.0962872	5.82149	5.8325e-09	1.72052e-07	FALSE	42315.2	40452.9	41442.6	42515.5	75534.9	60753.5	55607.8	53998.3
ENSDARG00000096904	91.1337	1.76296	0.302996	5.81844	5.94004e-09	1.75018e-07	FALSE	36.5015	38.5987	46.3319	43.3808	229.9	132.195	94.1592	106.302
ENSDARG00000010294	78.1986	-1.96835	0.338575	-5.81364	6.11285e-09	1.79898e-07	FALSE	96.8783	114.474	89.5791	105.333	9.85694	14.2109	34.3412	43.9366
ENSDARG00000057992	564.596	1.06025	0.182419	5.81215	6.16755e-09	1.81296e-07	FALSE	395.095	408.639	421.215	445.714	1105.52	589.538	1122.44	669.753
ENSDARG00000102317	27580.4	0.42083	0.0724292	5.81023	6.23875e-09	1.83174e-07	FALSE	25510.6	24164.2	24852.1	24943.9	36715.3	31962.8	35323.2	29162.8
ENSDARG00000003841	180.9	0.863518	0.148788	5.80367	6.48799e-09	1.90269e-07	FALSE	124.063	110.45	140.881	135.524	279.948	201.308	234.52	217.167
ENSDARG00000093535	794.379	0.502009	0.0866533	5.7933	6.90156e-09	2.02161e-07	FALSE	649.857	703.796	627.717	686.571	1007.06	831.908	959.756	980.23
ENSDARG00000018600	947.756	-0.498484	0.0860823	-5.79078	7.00585e-09	2.04737e-07	FALSE	1120.88	1193.09	1218.64	1284.12	857.788	979.597	810.782	768.599
ENSDARG00000097865	206.458	1.01083	0.174555	5.79091	7.00068e-09	2.04737e-07	FALSE	135.837	136.949	146.374	158.006	354.646	279.318	323.516	210.328
ENSDARG00000087767	74.7092	1.50511	0.260022	5.78841	7.10559e-09	2.0741e-07	FALSE	36.6086	41.7653	46.5777	41.6814	151.574	104.732	149.237	70.9124
ENSDARG00000034801	663.583	0.567845	0.0981643	5.78464	7.26664e-09	2.11865e-07	FALSE	537.211	627.96	551.148	558.904	834.604	836.505	957.016	748.473
ENSDARG00000042993	5572.85	-1.73836	0.300655	-5.7819	7.38595e-09	2.15093e-07	FALSE	8095.07	12073.3	11961.5	10669.3	2125.61	4889.79	3802.9	2010
ENSDARG00000021135	481.73	-0.636365	0.110104	-5.77968	7.48432e-09	2.17598e-07	FALSE	558.438	659.608	650.693	563.884	447.285	360.808	358.818	399.945
ENSDARG00000002745	6999.67	1.06387	0.184075	5.77957	7.48933e-09	2.17598e-07	FALSE	5146.24	4757.38	5336.15	5686.36	14699.3	9635.25	13109.6	6306.63
ENSDARG00000091317	3033.86	0.743188	0.128618	5.77826	7.54762e-09	2.19038e-07	FALSE	2285.13	2232.09	2210.57	2386.25	5054.44	2970.4	3840.39	3393
ENSDARG00000068261	532.416	0.628446	0.10879	5.77669	7.61826e-09	2.20833e-07	FALSE	516.984	399.016	439.672	456.668	767.951	735.293	663.862	626.174
ENSDARG00000077176	659.273	1.19475	0.206854	5.77583	7.6575e-09	2.21714e-07	FALSE	406.308	472.738	461.611	493.979	1550.09	814.767	1130.39	707.088
ENSDARG00000009782	1512.92	-0.865418	0.149867	-5.77458	7.71437e-09	2.23103e-07	FALSE	2089.83	2213.71	2122.29	1950.66	815.409	1495.09	1201.16	1086.1
ENSDARG00000053561	948.133	0.929293	0.160983	5.7726	7.8057e-09	2.25484e-07	FALSE	687.361	714.852	778.691	748.972	1420.96	1053.36	1975.51	1132.71
ENSDARG00000101667	210.213	-0.898891	0.155781	-5.77021	7.91722e-09	2.28442e-07	FALSE	258.034	332.585	327.36	321.302	138.398	201.812	161.242	164.941
ENSDARG00000089429	1421.64	-0.886042	0.153572	-5.76957	7.94764e-09	2.28976e-07	FALSE	1426.91	1665.62	1475.17	1456.22	783.517	690.47	649.101	1133.44
ENSDARG00000043722	246.844	-2.60022	0.45069	-5.76943	7.95397e-09	2.28976e-07	FALSE	338.053	625.568	544.446	508.052	39.355	182.088	66.0402	45.5611
ENSDARG00000069563	56.8569	1.68687	0.292474	5.76759	8.04148e-09	2.31229e-07	FALSE	28.5856	18.0321	18.9194	29.1079	81.4007	53.8418	72.7424	95.3407
ENSDARG00000053254	272546	0.714519	0.123952	5.76447	8.1915e-09	2.35273e-07	FALSE	220097	215120	225301	226880	449727	344244	400231	261966
ENSDARG00000025855	3295.85	0.524175	0.0909476	5.76349	8.23933e-09	2.36253e-07	FALSE	2652.17	2831.53	2877.11	2991.95	4463.06	4282.72	4247.43	3344.51
ENSDARG00000093087	14.8164	4.29932	0.745972	5.76338	8.24447e-09	2.36253e-07	FALSE	0	1.07203	5.06495	0.91904	31.7705	48.8392	49.4043	17.1221
ENSDARG00000061713	529.623	-0.717714	0.124566	-5.76173	8.32548e-09	2.38303e-07	FALSE	631.764	585.812	630.356	652.644	307.665	371.585	364.326	474.082
ENSDARG00000008858	138.675	-0.863258	0.149915	-5.75832	8.49536e-09	2.42888e-07	FALSE	175.309	203.667	180.587	174.517	105.163	102.375	83.2782	112.226
ENSDARG00000063078	54.7338	-1.45171	0.252149	-5.75734	8.54485e-09	2.44024e-07	FALSE	102.04	90.1222	82.5674	113.713	25.5192	39.4068	34.4231	41.9878
ENSDARG00000101175	126.803	-0.888176	0.154284	-5.75675	8.57463e-09	2.44597e-07	FALSE	140.569	177.774	142.691	143.159	71.8476	89.509	81.4036	83.6068
ENSDARG00000103433	26343.9	0.418382	0.0727164	5.75361	8.73583e-09	2.48912e-07	FALSE	24225.9	23974.9	22050.9	23190.4	35075.6	31754.6	30186.8	27862
ENSDARG00000074282	611.733	-0.644091	0.112029	-5.74934	8.9591e-09	2.54983e-07	FALSE	615.31	827.9	879.332	844.035	486.191	527.115	522.157	496.639
ENSDARG00000042030	2080.82	0.38036	0.0661865	5.74679	9.09515e-09	2.58562e-07	FALSE	1804.07	1766.77	1763.74	1761.67	2571.71	2245.74	2236.55	2184.3
ENSDARG00000088274	9.80448	-6.63876	1.15545	-5.74561	9.15881e-09	2.60077e-07	FALSE	38.9292	27.5993	23.1976	20.4426	1.00863	0	0	0
ENSDARG00000063297	287.486	-0.798835	0.139174	-5.73984	9.47673e-09	2.688e-07	FALSE	404.949	411.036	348.486	390.52	180.516	223.327	250.083	237.852
ENSDARG00000104085	1557.84	-0.515453	0.0898353	-5.73775	9.59425e-09	2.7152e-07	FALSE	1888.71	2066.23	1968.14	2047.34	1296.35	1544.88	1508.74	1230.04
ENSDARG00000038713	742.039	-0.564107	0.0983136	-5.73783	9.58962e-09	2.7152e-07	FALSE	826.996	1049.45	936.683	882.115	571.175	721.458	608.447	601.568
ENSDARG00000069498	758.296	0.725861	0.126541	5.73617	9.68418e-09	2.73447e-07	FALSE	613.996	572.131	636.705	675.297	895.553	1191.52	1205.82	841.669
ENSDARG00000087793	272.852	1.14354	0.199352	5.7363	9.67675e-09	2.73447e-07	FALSE	154.133	164.995	151.181	163.089	375.133	257.723	361.339	405.448
ENSDARG00000039843	207.311	0.901502	0.15722	5.73401	9.80817e-09	2.76637e-07	FALSE	160.288	148.081	156.182	191.262	354.241	274.143	357.866	243.02
ENSDARG00000055493	158.539	-1.21371	0.211729	-5.7324	9.90209e-09	2.78972e-07	FALSE	246.678	220.501	247.686	151.324	77.752	78.6469	92.3662	122.538
ENSDARG00000101565	89.4358	1.13325	0.197717	5.73168	9.9443e-09	2.79847e-07	FALSE	78.148	58.756	53.2653	76.7671	139.487	126.444	178.52	138.489
ENSDARG00000039217	265.007	-0.615242	0.107345	-5.73142	9.95913e-09	2.7995e-07	FALSE	295.994	317.045	282.637	321.83	189.555	209.451	183.689	211.93
ENSDARG00000103720	2515.98	1.02499	0.178922	5.7287	1.01203e-08	2.84163e-07	FALSE	1949.76	1782.83	1965.73	1667.89	5027.28	3051.98	4426.84	2483.88
ENSDARG00000056160	6729.22	-0.510164	0.0891282	-5.72394	1.04082e-08	2.91917e-07	FALSE	7927.99	8627.04	8466.15	7834.04	6692.49	5675.77	5659.4	5045.51
ENSDARG00000103934	46.6547	-1.48382	0.259342	-5.72149	1.05596e-08	2.95835e-07	FALSE	66.9578	58.816	61.667	59.5336	23.7888	30.0305	17.9166	17.0981
ENSDARG00000043932	1599.97	0.89782	0.156977	5.71942	1.06891e-08	2.99127e-07	FALSE	1185.55	1186.61	1228.45	1302.81	2289.02	1902.41	3272.58	1675.49
ENSDARG00000092354	565.248	0.619014	0.108242	5.71881	1.07274e-08	2.99866e-07	FALSE	470.7	402.384	518.264	397.798	705.106	625.085	711.967	702.156
ENSDARG00000036040	1816.43	0.479766	0.0839301	5.71626	1.08893e-08	3.0405e-07	FALSE	1628.41	1552.03	1534.02	1616.53	2475.18	2144.18	2299.51	1911.54
ENSDARG00000054271	2228.39	0.462354	0.0809123	5.71425	1.10186e-08	3.06979e-07	FALSE	2051.77	1862.03	1894.32	1958.39	2915.72	2459.51	2928.29	2395.4
ENSDARG00000101555	63.4763	1.17042	0.204819	5.7144	1.10089e-08	3.06979e-07	FALSE	46.8079	46.0695	45.497	33.494	102.293	91.6098	95.9094	94.1533
ENSDARG00000071891	18.2808	-3.02436	0.529314	-5.71374	1.10519e-08	3.07565e-07	FALSE	37.8833	33.2602	58.9335	52.3219	7.84949	9.61721	0	5.24965
ENSDARG00000103330	244.833	9.78944	1.71361	5.71276	1.11155e-08	3.08992e-07	FALSE	0	0	0.983193	0	0	147.322	428.047	587.885
ENSDARG00000096205	295.335	1.43025	0.250402	5.71181	1.11781e-08	3.10388e-07	FALSE	140.674	178.725	159.159	177.812	374.259	389.531	739.97	268.496
ENSDARG00000004141	846.929	-0.801874	0.140398	-5.71142	1.12037e-08	3.10755e-07	FALSE	943.367	997.503	1159.94	1107.91	452.421	699.642	555.572	706.227
ENSDARG00000021154	257.09	-0.964603	0.168987	-5.70813	1.14222e-08	3.16464e-07	FALSE	339.466	395.98	369.23	362.624	128.535	234.782	212.013	177.042
ENSDARG00000073766	808.513	-0.58712	0.102909	-5.70522	1.16196e-08	3.21578e-07	FALSE	1076.72	871.876	1211.72	969.92	658.411	720.082	684.418	685.742
ENSDARG00000104693	2616.43	1.1019	0.193314	5.70005	1.19774e-08	3.31114e-07	FALSE	1882.13	2020.51	1800.93	1972.11	5126.78	2854.07	5774.41	2721.41
ENSDARG00000056795	370.56	2.25542	0.395744	5.69918	1.20385e-08	3.32439e-07	FALSE	157.724	147.947	194.284	157.289	1228.28	631.919	1013.94	265.691
ENSDARG00000014024	72.0028	2.90434	0.509775	5.69729	1.21723e-08	3.35763e-07	FALSE	21.9145	27.8698	19.7379	25.3195	360.708	106.192	198.235	46.3849
ENSDARG00000063908	145311	0.426723	0.0749283	5.69509	1.23308e-08	3.39762e-07	FALSE	121661	121990	131666	137928	183321	171715	183462	151408
ENSDARG00000027249	7643.24	0.580953	0.102027	5.6941	1.24021e-08	3.4135e-07	FALSE	6342.31	6624.54	6254.31	6580.75	10599.9	9225.35	11182	7593.09
ENSDARG00000071333	378.531	0.667435	0.117238	5.693	1.24824e-08	3.43184e-07	FALSE	320.798	258.645	284.036	261.274	434.429	428.698	418.918	495.391
ENSDARG00000091209	1401.36	2.41886	0.424926	5.69243	1.2524e-08	3.43952e-07	FALSE	453.38	641.574	525.26	642.3	3435.36	4012.81	3779.09	875.2
ENSDARG00000002285	1130.57	0.49556	0.0870601	5.69216	1.25446e-08	3.44138e-07	FALSE	969.952	1007.34	976.733	983.398	1410.28	1407.48	1560.28	1177.7
ENSDARG00000097537	2323.57	0.520434	0.0914517	5.69081	1.26442e-08	3.46492e-07	FALSE	1868.66	2057.72	2026.6	2098.74	3200.86	2783.61	3150.32	2424.13
ENSDARG00000076241	2432.08	0.748196	0.131502	5.68962	1.27319e-08	3.48514e-07	FALSE	2010.74	1901.67	2058.72	2242.4	3710.53	3478.23	4178.46	2434.57
ENSDARG00000055092	2122.46	0.409425	0.0719926	5.68705	1.29256e-08	3.5343e-07	FALSE	1914.38	1946.47	1948.13	1907.23	2545.13	2310.83	2867.66	2525.07
ENSDARG00000058606	2133.93	0.781373	0.137537	5.68118	1.33772e-08	3.65381e-07	FALSE	1519.23	1538.14	1649.15	1368.76	2971.24	2539.72	2920.97	2010.39
ENSDARG00000011693	265.733	-0.683497	0.120366	-5.67847	1.35909e-08	3.70813e-07	FALSE	261.067	329.137	362.384	330.551	189.075	211.283	189.163	212.379
ENSDARG00000060153	901.21	-0.701139	0.123516	-5.67651	1.37472e-08	3.74672e-07	FALSE	972.798	1209.08	1194.79	1363.96	641.399	806.05	794.805	677.146
ENSDARG00000078167	49.0422	-1.90811	0.336178	-5.67589	1.3797e-08	3.75621e-07	FALSE	71.9024	70.8844	105.653	79.0487	12.8507	22.3431	13.7022	37.2902
ENSDARG00000073985	172.182	-1.12207	0.197746	-5.6743	1.39259e-08	3.78719e-07	FALSE	192.908	254.306	220.38	244.23	91.8775	116.615	69.4927	140.244
ENSDARG00000062808	15.19	-4.21084	0.742119	-5.67407	1.39441e-08	3.78801e-07	FALSE	38.0122	13.9309	53.3607	45.2418	1.96657	3.8211	1.80993	0.74762
ENSDARG00000092813	586.74	-0.872943	0.153862	-5.67355	1.39871e-08	3.7956e-07	FALSE	563.733	786.892	725.802	719.862	399.789	376.774	333.409	416.631
ENSDARG00000090840	39.6771	-1.58108	0.278761	-5.67181	1.41299e-08	3.8302e-07	FALSE	70.5888	71.475	79.2256	57.423	18.6505	16.5113	28.3295	29.999
ENSDARG00000100886	27.2636	-3.20532	0.565204	-5.67108	1.41901e-08	3.84236e-07	FALSE	42.7112	73.759	109.173	39.187	2.96438	6.58938	10.8353	8.16777
ENSDARG00000069615	2356.76	-0.855494	0.15086	-5.67076	1.42163e-08	3.84529e-07	FALSE	2892.27	2675.48	2736.48	2692.81	1191.58	2067.35	1135.75	1680.5
ENSDARG00000076485	268.456	-0.890213	0.157022	-5.66935	1.43337e-08	3.86871e-07	FALSE	354.852	415.598	343.566	406.174	162.695	265.612	213.049	180.362
ENSDARG00000096720	9.37303	6.68082	1.17839	5.66945	1.43256e-08	3.86871e-07	FALSE	0	0	0	0	35.9862	15.0936	23.5464	7.48079
ENSDARG00000087832	51.5303	2.65671	0.468673	5.66859	1.43978e-08	3.88184e-07	FALSE	5.82008	23.6211	25.4717	17.119	211.763	49.2085	137.779	63.0965
ENSDARG00000076848	46.0465	-1.52694	0.269426	-5.66738	1.44994e-08	3.89666e-07	FALSE	86.1077	66.4867	74.8637	47.882	21.609	27.8041	26.2597	19.4716
ENSDARG00000040427	78.4236	1.81978	0.32109	5.66752	1.44882e-08	3.89666e-07	FALSE	29.1965	30.0232	41.391	26.2055	54.0309	126.49	176.558	91.344
ENSDARG00000075985	22.9847	3.99307	0.704534	5.66768	1.44748e-08	3.89666e-07	FALSE	0	1.07383	8.82239	3.60547	74.5356	41.4807	97.9106	13.5209
ENSDARG00000005989	1125.47	0.744118	0.131321	5.6664	1.4583e-08	3.91492e-07	FALSE	919.733	820.049	775.245	987.189	1835.46	1179.1	1558.67	1290.16
ENSDARG00000005359	5296.4	-0.37238	0.0657331	-5.66503	1.47e-08	3.93253e-07	FALSE	5978.82	6141.2	6060.54	6131.01	4405.34	5120.98	4871.3	4387.15
ENSDARG00000035563	1542.7	0.412729	0.0728573	5.6649	1.47113e-08	3.93253e-07	FALSE	1471.22	1317.89	1366.46	1401.55	1745.31	1864.58	1971.67	1810.53
ENSDARG00000099851	244.874	-0.712527	0.12577	-5.66531	1.46763e-08	3.93253e-07	FALSE	325.919	308.15	320.346	314.444	194.114	215.174	170.412	194.551
ENSDARG00000042010	860.705	-0.967573	0.170791	-5.66524	1.46815e-08	3.93253e-07	FALSE	1210.08	1507.36	1427.08	1329.8	543.29	774.188	945.544	538.017
ENSDARG00000032831	393.668	-0.731394	0.129124	-5.66429	1.47631e-08	3.94217e-07	FALSE	423.116	491.203	425.315	443.47	278.902	262.863	244.511	287.664
ENSDARG00000044914	1786.56	-0.663247	0.11712	-5.66295	1.48789e-08	3.96888e-07	FALSE	2277.32	2536.13	2413.81	2554.38	1229.95	1751.59	1822.52	1374.89
ENSDARG00000060992	110.163	-1.06314	0.187777	-5.66171	1.49875e-08	3.99358e-07	FALSE	154.693	139.411	190.096	152.673	86.433	54.6557	91.4578	72.648
ENSDARG00000095893	52.8964	3.39195	0.599485	5.65811	1.53053e-08	4.07395e-07	FALSE	8.53898	6.70048	7.3104	27.2344	220.612	216.329	38.0102	34.1109
ENSDARG00000104841	184.538	-1.0439	0.184551	-5.65641	1.54575e-08	4.1101e-07	FALSE	252.178	311.14	269.312	212.077	148.205	130.724	99.647	128.217
ENSDARG00000054400	354.278	-0.737207	0.130354	-5.65543	1.55461e-08	4.12927e-07	FALSE	456.047	441.793	475.875	401.865	208.236	319.454	262.852	273.511
ENSDARG00000012671	359.53	0.906656	0.16038	5.65316	1.57522e-08	4.17957e-07	FALSE	266.393	286.62	278.462	236.159	666.854	422.202	532.903	380.658
ENSDARG00000103135	448.052	-0.658587	0.116537	-5.65129	1.59248e-08	4.22092e-07	FALSE	652.349	635.831	579.904	523.339	409.723	410.375	330.909	362.381
ENSDARG00000052082	4926.34	0.518192	0.0917213	5.64964	1.60787e-08	4.25292e-07	FALSE	4428.14	3961.29	4428.78	4301.31	6823.76	5906.99	6726.53	5063.19
ENSDARG00000101757	213.96	1.73681	0.307421	5.64963	1.60795e-08	4.25292e-07	FALSE	71.296	93.4106	131.277	99.1098	307.841	145.696	521.203	346.279
ENSDARG00000012458	3910.67	0.537411	0.0951646	5.64717	1.63109e-08	4.30504e-07	FALSE	3673.89	3330.11	3280.17	3253.1	5259.4	4734.82	5631.56	4018.14
ENSDARG00000057881	2440.56	-0.554586	0.098205	-5.64723	1.63054e-08	4.30504e-07	FALSE	2836.17	2986.69	3003	3209.01	2009.25	2456.47	1737.88	1994.31
ENSDARG00000053459	1068.1	0.409239	0.0724704	5.64698	1.63296e-08	4.30544e-07	FALSE	941.682	865.285	891.99	959.82	1252.18	1177.37	1248.04	1181.21
ENSDARG00000026634	2376.96	0.358232	0.0634435	5.64648	1.63769e-08	4.31338e-07	FALSE	2066.83	1935.86	2014.98	2001.15	2601.63	2678.97	2381.16	2613.31
ENSDARG00000037852	320.981	-0.864108	0.153051	-5.64589	1.64331e-08	4.32365e-07	FALSE	434.112	483.163	437.471	391.91	181.431	216.058	259.355	300.047
ENSDARG00000087457	175.012	1.30457	0.231146	5.64394	1.66204e-08	4.36835e-07	FALSE	146.331	99.3017	101.385	106.752	287.771	173.158	391.979	257.59
ENSDARG00000076713	18.0155	5.37759	0.953074	5.64237	1.67728e-08	4.40379e-07	FALSE	0	1.11995	1.15787	0	32.6106	34.6485	8.31799	34.1688
ENSDARG00000089853	30.5609	2.30702	0.409036	5.64014	1.69912e-08	4.45645e-07	FALSE	10.2662	21.5441	14.7836	7.76784	79.9892	79.3861	65.6721	36.559
ENSDARG00000058088	2601.87	-0.591896	0.104966	-5.63895	1.71086e-08	4.48256e-07	FALSE	3158.34	3419.36	3019.36	3161.41	1634.72	2359.44	2124.67	2342.5
ENSDARG00000023656	141.929	-3.86177	0.684917	-5.63831	1.71727e-08	4.49466e-07	FALSE	91.1062	153.059	73.7613	88.1717	0	1.89425	14.4665	11.1725
ENSDARG00000030166	213.446	-0.992227	0.176007	-5.63743	1.72607e-08	4.51298e-07	FALSE	323.791	368.989	297.104	286.113	112.75	170.287	197.365	161.209
ENSDARG00000012405	63189.4	-0.546396	0.0969815	-5.63403	1.76048e-08	4.59816e-07	FALSE	74726	74669.8	70508	71228.1	53556.3	43327.1	49257.2	53202.9
ENSDARG00000043180	2187.14	-0.550206	0.0977092	-5.63105	1.79111e-08	4.67328e-07	FALSE	2573.35	2683.84	2802.18	2703.06	1547.31	2215.08	1860.47	1729.37
ENSDARG00000002991	483.219	1.06145	0.188533	5.63006	1.80149e-08	4.69548e-07	FALSE	311.997	351.024	259.079	281.752	795.382	698.824	414.719	602.243
ENSDARG00000098378	687.213	0.863308	0.153352	5.62959	1.80634e-08	4.70323e-07	FALSE	499.781	507.255	488.441	509.866	952.064	746.492	1199.41	754.293
ENSDARG00000077237	1523.48	0.496109	0.0881426	5.62848	1.81806e-08	4.72885e-07	FALSE	1353.19	1204.11	1112.76	1452.84	1912.46	1743.53	1884.26	1685.08
ENSDARG00000079198	1826.5	0.467357	0.0830505	5.62739	1.8296e-08	4.75392e-07	FALSE	1509.45	1486.32	1560.99	1639.89	2440.3	1958.14	2230.27	1945.81
ENSDARG00000011245	968.728	-0.816906	0.145179	-5.62691	1.83471e-08	4.76227e-07	FALSE	1367.06	1254.6	1131.37	1301.32	682.925	504.272	777.973	899.984
ENSDARG00000046157	17173.8	0.470607	0.0836602	5.62522	1.8527e-08	4.79755e-07	FALSE	15880.6	14598.4	15112.1	15533.9	23938.2	20093.4	22740	17930.6
ENSDARG00000000666	1770.86	0.698169	0.124117	5.6251	1.85404e-08	4.79755e-07	FALSE	1411.5	1465.38	1570.61	1562.61	2808.61	2171.78	2891.25	1885.9
ENSDARG00000079166	993.256	-1.11188	0.197653	-5.62543	1.85052e-08	4.79755e-07	FALSE	1549.62	1581.53	1711.54	1660.56	418.628	980.286	974.42	636.215
ENSDARG00000036489	3211.94	0.325812	0.0579797	5.61941	1.91611e-08	4.95304e-07	FALSE	3007.54	2850.03	2916.28	2951.88	3749.42	3549.56	3958.29	3439.1
ENSDARG00000099104	28673.7	0.361448	0.0643246	5.61913	1.91918e-08	4.95588e-07	FALSE	27651.6	26530.1	26070.4	26520.1	37634.2	33044.7	35632	30862.8
ENSDARG00000104823	1052.64	0.653779	0.116533	5.61027	2.02015e-08	5.20588e-07	FALSE	801.019	886.049	857.268	934.361	1256.56	1480.78	1611.52	1131.13
ENSDARG00000101665	155.46	1.08665	0.193688	5.61031	2.01959e-08	5.20588e-07	FALSE	94.572	85.8964	102.858	127.036	232.345	200.713	207.578	234.369
ENSDARG00000023963	3155.3	0.616243	0.10986	5.60937	2.03067e-08	5.22762e-07	FALSE	2760.13	2686.52	2754.34	2643.74	4760.16	3549.48	4879.89	3436.34
ENSDARG00000100353	287.347	1.28883	0.229843	5.60744	2.05345e-08	5.28085e-07	FALSE	167.606	206.009	98.2612	170.54	503.455	349.032	368.714	347.214
ENSDARG00000092730	397.208	-0.854296	0.152392	-5.60589	2.07182e-08	5.32263e-07	FALSE	512.081	586.958	563.476	377.701	250.42	236.268	331.329	308.235
ENSDARG00000001829	3185.57	0.48463	0.08647	5.6046	2.08737e-08	5.35161e-07	FALSE	2756.33	2371.22	2652.76	3063.61	3928.99	3670.54	4120.99	3454.53
ENSDARG00000060306	1458.08	0.505022	0.0901081	5.60463	2.08706e-08	5.35161e-07	FALSE	1262.24	1279.92	1227.43	1287.35	2012.21	1842.72	1782.23	1544.22
ENSDARG00000074359	47.3142	1.85237	0.33055	5.60392	2.09555e-08	5.3671e-07	FALSE	18.9279	23.6147	12.7511	9.91685	56.8858	55.8847	71.5927	47.2914
ENSDARG00000038754	1809.84	0.466383	0.0832593	5.60158	2.12411e-08	5.43469e-07	FALSE	1560.28	1545.56	1466.7	1602.4	2360.93	2086.09	2251.05	1837.47
ENSDARG00000089307	138.618	1.46322	0.261248	5.60089	2.13252e-08	5.44509e-07	FALSE	100.007	90.8656	65.9274	91.8796	238.828	196.254	382.002	142.7
ENSDARG00000059026	24.3848	-2.75488	0.491864	-5.60089	2.1325e-08	5.44509e-07	FALSE	35.1647	56.7444	45.6347	27.1975	4.923	0.950961	9.94713	8.20621
ENSDARG00000069956	711.763	-0.834404	0.149	-5.60004	2.14303e-08	5.46636e-07	FALSE	811.805	824.509	999.178	783.132	318.897	521.936	528.536	545.252
ENSDARG00000101322	482.749	-1.09321	0.195234	-5.59946	2.15024e-08	5.47918e-07	FALSE	514.221	680.397	495.774	567.315	158.937	370.572	231.957	296.364
ENSDARG00000019316	250.711	1.17706	0.210216	5.59926	2.15266e-08	5.47977e-07	FALSE	169.27	180.525	187.334	159.966	410.423	265.11	576.449	331.227
ENSDARG00000075993	713.584	0.865967	0.154765	5.59537	2.20153e-08	5.59849e-07	FALSE	611.651	525.411	489.772	571.99	1187.68	835.64	1228.67	753.98
ENSDARG00000010862	767.874	-0.533759	0.0954319	-5.59309	2.23065e-08	5.6668e-07	FALSE	888.989	973.232	1075.86	927.213	617.467	688.845	697.57	668.087
ENSDARG00000099524	305.801	-0.711216	0.127344	-5.585	2.33699e-08	5.93093e-07	FALSE	354.73	380.654	388.272	403.015	259.345	230.949	191.046	252.324
ENSDARG00000077069	620.935	1.28944	0.230914	5.5841	2.3491e-08	5.95566e-07	FALSE	387.671	432.596	426.751	435.446	1478.23	757.775	1341.12	539.063
ENSDARG00000010516	25592.1	0.366453	0.0656439	5.58244	2.37167e-08	6.00678e-07	FALSE	23535.9	23090.3	23426.7	23715.2	33066.5	28712.5	31902.9	27207.6
ENSDARG00000042982	529.385	-0.964329	0.172749	-5.58224	2.37435e-08	6.0075e-07	FALSE	802.992	825.6	879.241	820.583	265.261	509.674	534.182	396.779
ENSDARG00000004925	50.64	1.43353	0.256867	5.5808	2.39413e-08	6.05145e-07	FALSE	17.2421	28.6842	28.9459	26.3224	75.7108	69.9669	69.0647	64.1161
ENSDARG00000009021	1521.49	0.5537	0.0992381	5.57951	2.41199e-08	6.09047e-07	FALSE	1319.77	1387.49	1399.05	1313.49	2276.2	1858.86	2181.87	1643.37
ENSDARG00000060723	1698.96	-0.457101	0.0819535	-5.57757	2.43898e-08	6.15241e-07	FALSE	1872.48	2047.58	1752.42	1983.87	1368.56	1489.03	1265.42	1454.33
ENSDARG00000094732	938.57	0.638487	0.114481	5.57724	2.44368e-08	6.15327e-07	FALSE	809.373	694.561	672.934	820.204	1000.88	1265.61	1187.84	1203.46
ENSDARG00000088337	304.554	-1.20877	0.216734	-5.5772	2.44423e-08	6.15327e-07	FALSE	405.591	358.739	282.677	600.492	198.909	127.6	193.13	193.213
ENSDARG00000100875	131.276	-0.894005	0.160372	-5.57456	2.48162e-08	6.24113e-07	FALSE	140.272	174.712	178.672	170.023	86.4985	103.293	69.6959	98.7417
ENSDARG00000094428	76.5634	1.75939	0.315655	5.57378	2.49271e-08	6.26276e-07	FALSE	33.6864	31.0538	47.5854	41.6886	207.701	82.8002	154.653	79.8545
ENSDARG00000034326	1524.8	0.367161	0.0658896	5.57237	2.51292e-08	6.30721e-07	FALSE	1348.1	1354.12	1398.54	1320.6	1828.58	1651.72	1838.65	1675.45
ENSDARG00000016598	6089.82	-0.259719	0.0466195	-5.57104	2.53217e-08	6.34917e-07	FALSE	6845.83	6751.37	7064.77	6717.43	5622.04	5734.73	5608.95	5900.56
ENSDARG00000017454	1738.12	-0.408205	0.0732951	-5.56933	2.55719e-08	6.40549e-07	FALSE	1945.7	2034.71	1948.85	1855.38	1384.25	1543.45	1347.39	1587.2
ENSDARG00000008263	263.161	0.975021	0.175076	5.56914	2.56005e-08	6.40626e-07	FALSE	233.521	223.049	194.067	159.913	515.68	326.914	402.04	343.737
ENSDARG00000061602	392.023	1.14085	0.204885	5.56823	2.57342e-08	6.43329e-07	FALSE	235.072	214.36	232.697	244.012	334.012	421.152	515.887	768.42
ENSDARG00000051940	651.448	-0.638279	0.114663	-5.56658	2.59791e-08	6.48724e-07	FALSE	990.769	858.069	927.281	910.609	562.595	597.024	690.173	518.359
ENSDARG00000039747	68.3835	-2.37141	0.42602	-5.56643	2.60017e-08	6.48724e-07	FALSE	100.915	141.078	146.615	127.876	45.7988	4.74012	21.8314	27.6736
ENSDARG00000062397	1514.88	0.366139	0.0658146	5.56319	2.64885e-08	6.60211e-07	FALSE	1200.64	1163.27	1161.76	1224.26	1431.45	1627.31	1468.93	1592.51
ENSDARG00000042282	607.089	0.48742	0.0876194	5.56292	2.65299e-08	6.60586e-07	FALSE	536.9	511.561	476.09	534.982	782.124	738.559	699.633	666.991
ENSDARG00000055475	17323.1	0.485092	0.0872073	5.56252	2.65913e-08	6.6146e-07	FALSE	14999.2	15233.3	14760	15357.8	24206.7	19396.4	22591.4	18281.3
ENSDARG00000101789	232.671	0.948743	0.170608	5.56097	2.68282e-08	6.6669e-07	FALSE	208.581	158.748	163.348	182.4	450.681	256.299	360.462	305.729
ENSDARG00000011613	6505.59	0.277447	0.0498965	5.56046	2.69062e-08	6.67966e-07	FALSE	5983.41	5803.48	5909.44	6103.13	7238.38	6893.66	7703.48	7012.26
ENSDARG00000038069	53.8203	-1.6791	0.302114	-5.55783	2.73144e-08	6.7743e-07	FALSE	55.4451	95.4505	135.875	76.7746	24.5518	23.0225	37.1289	29.2147
ENSDARG00000012640	181.548	-1.17165	0.210826	-5.55742	2.73787e-08	6.78353e-07	FALSE	217.034	300.747	289.136	354.743	113.288	152.834	167.243	84.9747
ENSDARG00000073742	6241.99	-1.53655	0.27659	-5.55533	2.77086e-08	6.85849e-07	FALSE	8906.01	13133.1	12241.7	10199.1	2260.35	5276.11	4954.79	2842.03
ENSDARG00000006207	567.378	1.85047	0.333116	5.55503	2.7756e-08	6.86345e-07	FALSE	285.734	319.474	352.743	315.401	1725.18	1206	1220.05	443.635
ENSDARG00000006837	1773.66	0.524515	0.0944256	5.5548	2.77929e-08	6.8658e-07	FALSE	1622.39	1448.41	1422.24	1512.52	2587.2	2111.77	1986.6	1951
ENSDARG00000042933	956.471	0.408921	0.0736206	5.55443	2.78518e-08	6.87357e-07	FALSE	843.631	829.962	857.433	869.054	1204.23	1083.85	1180.84	1050.23
ENSDARG00000042725	1154.36	1.98606	0.357615	5.55363	2.79793e-08	6.89826e-07	FALSE	579.076	627.906	565.442	574.678	3945.45	1821.87	2643.21	888.738
ENSDARG00000087402	6474.99	-0.430949	0.0776026	-5.55328	2.8036e-08	6.90546e-07	FALSE	7555.43	8167.95	8082.92	7063	5417.63	5594.26	6402.59	5483.52
ENSDARG00000063624	1288.08	-0.570531	0.102772	-5.55144	2.83321e-08	6.97154e-07	FALSE	1561.9	1674.04	1542.82	1430.7	1097.97	1216.15	863.442	1004.45
ENSDARG00000070078	199.598	-2.44664	0.440743	-5.55116	2.83775e-08	6.97585e-07	FALSE	295.754	369.603	390.939	461.382	29.1726	139.634	31.1549	78.5572
ENSDARG00000074846	115.811	1.06376	0.191707	5.5489	2.87471e-08	7.05287e-07	FALSE	90.5956	70.9364	74.7541	85.7765	144.771	150.359	214.127	161.469
ENSDARG00000045835	572.211	-3.06952	0.55316	-5.54907	2.87197e-08	7.05287e-07	FALSE	867.853	1366.48	1799.03	1591.47	54.7205	376.9	154.659	83.991
ENSDARG00000039093	11297.2	-0.625584	0.112806	-5.54567	2.92826e-08	7.17723e-07	FALSE	13048.6	14721.3	14018	12538.6	6934.03	10595.7	8159.4	9525.34
ENSDARG00000058444	230.447	0.774983	0.13991	5.53916	3.03921e-08	7.44191e-07	FALSE	153.791	196.743	181.043	160.801	320.535	304.92	291.589	271.399
ENSDARG00000087993	608.778	0.588682	0.106281	5.53891	3.04364e-08	7.44548e-07	FALSE	505.9	463.988	558.401	525.751	842.721	733.515	866.024	651.868
ENSDARG00000053058	25391.6	0.343949	0.062156	5.53364	3.1365e-08	7.66516e-07	FALSE	22582.2	22536.4	24111.3	23788.2	31930.6	27830.8	30588.2	27721.5
ENSDARG00000043821	2493.61	0.331921	0.0600249	5.52972	3.20736e-08	7.83071e-07	FALSE	2335.18	2191.99	2218.23	2208.82	3006.56	2737.37	2835.09	2687.89
ENSDARG00000101473	19.5706	6.33801	1.1464	5.52861	3.22771e-08	7.87272e-07	FALSE	0	0	0	0	2.97942	13.2607	19.0671	28.3793
ENSDARG00000070394	966.924	-0.846637	0.153185	-5.52691	3.25922e-08	7.94184e-07	FALSE	1183.6	1312.16	1635.93	1554.25	604.582	994.924	861.662	703.537
ENSDARG00000052783	691.594	-0.489726	0.0886198	-5.52615	3.27341e-08	7.96868e-07	FALSE	839.923	727.877	765.609	765.805	602.431	480.418	587.497	534.258
ENSDARG00000013430	31586.7	0.555931	0.100604	5.52591	3.27789e-08	7.97186e-07	FALSE	28916.6	29798.2	29763.9	28470.2	46091.3	40287	50482	35071.9
ENSDARG00000089225	953.827	0.470838	0.0852192	5.52502	3.29444e-08	8.00078e-07	FALSE	842.943	757.268	770.226	898.12	1072.54	1150.86	1252.41	1055.75
ENSDARG00000056630	311.3	0.663628	0.120115	5.52493	3.29616e-08	8.00078e-07	FALSE	225.097	273.399	254.617	294.055	410.328	383.087	450.744	418.743
ENSDARG00000102650	80.2977	1.07131	0.194012	5.52187	3.35409e-08	8.1335e-07	FALSE	56.7628	49.3835	60.7728	54.0743	129.435	104.141	126.889	104.379
ENSDARG00000033138	547.501	0.65797	0.119169	5.52132	3.36471e-08	8.15137e-07	FALSE	429.331	489.656	424.317	460.177	793.316	798.689	697.245	562.041
ENSDARG00000040971	2205.97	0.536495	0.0972376	5.51736	3.44124e-08	8.32874e-07	FALSE	1932.39	1964.87	2019.58	2010.33	3061.22	2710.11	3364.92	2367.3
ENSDARG00000098761	122.593	1.2937	0.234529	5.51618	3.46452e-08	8.37699e-07	FALSE	60.3447	84.8496	100.959	54.6909	239.901	157.888	193.475	148.575
ENSDARG00000054160	45.7034	2.41634	0.438182	5.51447	3.49828e-08	8.45048e-07	FALSE	19.8555	20.5835	15.3165	17.5585	188.987	53.0979	103.826	43.6613
ENSDARG00000090381	165.71	-0.780277	0.14154	-5.51278	3.53205e-08	8.52382e-07	FALSE	210.019	210.242	238.091	213.985	127.636	135.377	108.686	136.392
ENSDARG00000070061	397.656	1.27693	0.231724	5.51056	3.57689e-08	8.62373e-07	FALSE	249.362	289.6	265.774	249.012	992.168	595.747	640.005	328.568
ENSDARG00000088449	2187.35	0.537968	0.0976558	5.50882	3.61244e-08	8.70109e-07	FALSE	2114.07	1763.2	1994.22	1799.07	3034.29	2481.7	3141.17	2474.82
ENSDARG00000040869	142.163	-1.35626	0.246282	-5.50693	3.65156e-08	8.78686e-07	FALSE	207.253	253.36	202.724	197.314	59.2086	114.622	58.4639	103.465
ENSDARG00000102744	1627.35	-0.364152	0.0661588	-5.50422	3.70812e-08	8.91442e-07	FALSE	1977.29	2014.63	1903.38	1796.18	1529.67	1470.41	1583.41	1391.12
ENSDARG00000052336	548.641	-0.641578	0.116574	-5.50359	3.72134e-08	8.93764e-07	FALSE	640.329	859.559	695.076	773.773	472.65	517.086	511.416	406.388
ENSDARG00000074081	97.0813	1.3342	0.242614	5.49927	3.81364e-08	9.15055e-07	FALSE	58.2169	69.7818	52.9288	68.4926	207.877	132.112	183.084	108.136
ENSDARG00000056640	1061.9	-0.443621	0.0806815	-5.49842	3.83205e-08	9.18594e-07	FALSE	1207.38	1297.37	1137.52	1358.07	931.979	906.799	903.37	935.471
ENSDARG00000024443	1343.32	0.45582	0.0829709	5.49373	3.93532e-08	9.42448e-07	FALSE	1088.59	1073.98	1109.47	1206.02	1478.04	1454.66	1760.81	1453.4
ENSDARG00000008553	253.724	-0.874295	0.159153	-5.49344	3.94181e-08	9.431e-07	FALSE	362.353	424.025	372.792	385.218	231.271	173.479	256.623	182.148
ENSDARG00000042172	559.387	1.12943	0.205626	5.49264	3.95959e-08	9.46452e-07	FALSE	379.649	413.417	403.291	431.161	853.981	610.014	1399.43	699.069
ENSDARG00000052816	1379.97	-0.548066	0.0998062	-5.4913	3.98987e-08	9.52781e-07	FALSE	1529.84	1521.99	1919.17	1784.56	1025.92	1277.84	1112.16	1207.61
ENSDARG00000102114	37.7645	-1.81253	0.330209	-5.48902	4.04163e-08	9.64223e-07	FALSE	68.6468	61.9067	89.0404	58.1822	15.5059	19.7578	10.125	32.6675
ENSDARG00000062795	986.122	-0.40466	0.0737352	-5.48801	4.06496e-08	9.68867e-07	FALSE	1101.54	1076.3	1242.41	1110.51	849.748	887.012	815.41	872.385
ENSDARG00000093907	99.8596	-1.32577	0.241602	-5.4874	4.07893e-08	9.70351e-07	FALSE	154.812	151.16	179.509	222.385	81.5605	74.6727	60.6541	66.6063
ENSDARG00000069192	238.811	-1.51376	0.275852	-5.48756	4.07517e-08	9.70351e-07	FALSE	391.91	358.576	368.705	508.461	174.39	50.5788	167.748	176.945
ENSDARG00000028614	837.347	0.560657	0.102207	5.4855	4.12302e-08	9.78229e-07	FALSE	816.685	636.251	730.691	635.805	1108.9	994.109	1122.64	924.568
ENSDARG00000055490	120.197	-1.06081	0.193385	-5.48547	4.12375e-08	9.78229e-07	FALSE	168.119	150.029	182.786	140.241	64.894	58.2803	76.9238	104.674
ENSDARG00000090873	33.2018	2.72552	0.49686	5.48548	4.12347e-08	9.78229e-07	FALSE	7.34807	19.4236	8.03634	12.0292	136.012	40.8073	90.2452	45.9299
ENSDARG00000091306	2216.44	0.344976	0.0628965	5.48482	4.13899e-08	9.80917e-07	FALSE	1896.87	1973.96	1883.23	1956.18	2525.61	2444.97	2301.98	2521.77
ENSDARG00000057590	347.013	0.928341	0.169331	5.48241	4.1957e-08	9.93419e-07	FALSE	270.462	228.445	255.6	199.887	574.799	316.921	517.928	402.849
ENSDARG00000075295	1104.38	0.588653	0.107434	5.47919	4.27277e-08	1.01071e-06	FALSE	1068.17	862.7	900.069	899.105	1541.37	1165.26	1446.74	1449.22
ENSDARG00000036865	393.964	0.914955	0.167138	5.47426	4.39346e-08	1.0373e-06	FALSE	282.962	334.425	296.465	306.236	800.017	482.727	561.654	460.2
ENSDARG00000086077	16.0916	3.1034	0.566905	5.47429	4.39277e-08	1.0373e-06	FALSE	3.83949	1.66344	0	7.45807	22.7754	32.3527	30.6138	20.8757
ENSDARG00000051939	1880.58	-0.901981	0.164799	-5.47323	4.41899e-08	1.04235e-06	FALSE	2458.97	2849.17	3030.81	2807.82	876.14	1649.11	1763.38	1676.05
ENSDARG00000103546	975.937	-0.763488	0.139527	-5.47196	4.45089e-08	1.04889e-06	FALSE	1133.41	1215.68	1226.12	1124.64	548.343	871.072	614.676	734.122
ENSDARG00000093476	118.018	1.54914	0.283127	5.47153	4.46173e-08	1.05045e-06	FALSE	55.0224	36.5875	65.7888	73.8376	122.806	109.344	249.871	198.32
ENSDARG00000002912	1625	0.473274	0.0865063	5.47098	4.47562e-08	1.05274e-06	FALSE	1484.07	1429.04	1380.24	1391.72	2299.78	1860.48	1994.68	1737.12
ENSDARG00000005867	1641.84	0.494531	0.0903996	5.47049	4.48781e-08	1.05462e-06	FALSE	1224.08	1295.31	1195.33	1281.14	1902.9	1891.66	1461.61	1784.73
ENSDARG00000004632	914.672	0.412502	0.0754602	5.46649	4.59036e-08	1.07669e-06	FALSE	838.416	782.046	788.706	754.656	1141.68	981.733	1074.27	1008.19
ENSDARG00000075593	2076.43	0.713017	0.130433	5.46654	4.58903e-08	1.07669e-06	FALSE	1677.36	1810.98	1658.46	1633.81	3494.8	2283.01	3098.39	2240.69
ENSDARG00000071024	420.673	2.21849	0.406051	5.46358	4.66615e-08	1.09345e-06	FALSE	218.294	71.8515	70.3596	153.22	606.747	346.477	839.682	589.958
ENSDARG00000010434	1534.81	0.746553	0.136661	5.46281	4.68655e-08	1.0972e-06	FALSE	1158.52	1305.75	1274.85	1336.32	2665.51	1899.34	2377	1581
ENSDARG00000101859	1370.26	0.44578	0.0816127	5.46215	4.70413e-08	1.10029e-06	FALSE	1134.15	1184.63	1114.88	1281.04	1712.31	1501.53	1741.86	1472.98
ENSDARG00000087303	3402.95	1.38649	0.25394	5.45992	4.76347e-08	1.11313e-06	FALSE	1859.16	2275.22	2402.36	1715.12	7227.54	4458.01	6548.13	3342.47
ENSDARG00000053104	306.646	-0.774019	0.14179	-5.45892	4.79052e-08	1.11841e-06	FALSE	379.277	383.125	386.779	394.57	195.355	275.644	180.609	252.304
ENSDARG00000011259	645.38	0.787016	0.144175	5.45874	4.79519e-08	1.11846e-06	FALSE	442.231	431.605	617.423	452.729	1007.91	858.225	768.082	724.397
ENSDARG00000017219	30513.7	0.468419	0.0858593	5.45566	4.879e-08	1.1359e-06	FALSE	28496.5	27008.5	25133.8	26277.3	41510.6	35799	39180.5	31435.9
ENSDARG00000093877	141.383	0.921709	0.168945	5.45568	4.87849e-08	1.1359e-06	FALSE	77.6591	88.0116	97.1227	105.541	153.487	168.606	174.59	204.913
ENSDARG00000098820	832.946	0.527031	0.0966078	5.45536	4.88725e-08	1.13676e-06	FALSE	662.843	711.942	717.605	776.31	1228.07	985.787	986.873	942.524
ENSDARG00000042559	896.809	-0.68969	0.126492	-5.45246	4.96787e-08	1.15444e-06	FALSE	1164.97	1082.18	1031.47	1077.85	802.355	700.362	494.907	702.708
ENSDARG00000044719	2161.69	0.43533	0.079867	5.45069	5.01738e-08	1.16487e-06	FALSE	1861.01	1956.13	1907.25	2051.36	2741.93	2883.06	2620.27	2279.49
ENSDARG00000055901	790.041	1.10975	0.203672	5.44869	5.07414e-08	1.17696e-06	FALSE	484.621	551.829	614.484	733.545	1945.33	1198.83	1216.36	793.805
ENSDARG00000100826	7523.08	0.633722	0.116368	5.44586	5.15554e-08	1.19473e-06	FALSE	6726.52	6525.84	5878.9	6750.58	10222.2	9973.76	12235.8	7728.48
ENSDARG00000061301	1034.12	-0.53619	0.0984697	-5.44523	5.17395e-08	1.19789e-06	FALSE	1373.09	1267.63	1164.65	1105.65	833.589	838.33	734.416	972.925
ENSDARG00000057936	801.589	0.390408	0.0717026	5.44482	5.18581e-08	1.19953e-06	FALSE	693.112	691.729	671.579	675.657	977.204	861.301	872.057	870.39
ENSDARG00000025301	10724.2	0.492312	0.0904228	5.44456	5.19341e-08	1.20018e-06	FALSE	9702.49	8997.25	9304.28	9336.31	15938.6	11995.1	12853	11740.7
ENSDARG00000027689	786.487	-0.554761	0.10192	-5.44308	5.23671e-08	1.20907e-06	FALSE	941.863	895.275	800.127	873.45	601.159	563.868	527.461	692.223
ENSDARG00000053488	26.4993	2.81842	0.517834	5.4427	5.24782e-08	1.21052e-06	FALSE	17.2858	3.17518	7.77813	5.35014	91.1285	36.9029	70.6029	28.5461
ENSDARG00000093671	309.548	-1.32236	0.243039	-5.44091	5.30082e-08	1.22163e-06	FALSE	274.378	386.864	565.844	401.201	114.844	106.55	198.141	230.867
ENSDARG00000068586	96.4087	-1.70659	0.31381	-5.43829	5.37952e-08	1.23862e-06	FALSE	151.654	144.819	174.087	189.578	31.4148	77.7977	67.0268	26.9832
ENSDARG00000101885	11.0881	-5.57035	1.02538	-5.43248	5.55758e-08	1.27845e-06	FALSE	32.462	39.5514	10.0709	41.2353	0	0.934706	0	1.48005
ENSDARG00000005675	890.101	-0.411527	0.075776	-5.43084	5.60908e-08	1.28911e-06	FALSE	1008.56	1094.5	1111.83	997.965	841.092	754.189	806.109	768.8
ENSDARG00000023290	7635.39	0.347185	0.0639483	5.42916	5.66207e-08	1.3001e-06	FALSE	6853.82	6507.2	6676.12	6979.42	9181.73	9107.61	7846.95	8234.18
ENSDARG00000055784	904.02	0.80638	0.148547	5.42843	5.68513e-08	1.3042e-06	FALSE	714.61	684.936	757.662	781.354	1326.68	1123.44	1732.05	960.462
ENSDARG00000056695	1176.44	0.575287	0.106007	5.42686	5.73537e-08	1.31452e-06	FALSE	1056.68	894.641	1041.78	932.906	1684.14	1267.76	1612.93	1283
ENSDARG00000056934	914.849	0.51152	0.0943162	5.42346	5.8456e-08	1.33612e-06	FALSE	737.836	714.45	782.862	814.263	1269.33	1061.37	1028.96	994.658
ENSDARG00000024540	2124.24	0.890122	0.164122	5.42355	5.84284e-08	1.33612e-06	FALSE	1637.99	1711.12	1581	1640.04	4206.36	2396.1	3359.75	2216.73
ENSDARG00000016815	73.3715	1.40886	0.259762	5.42364	5.83968e-08	1.33612e-06	FALSE	24.7724	52.0796	48.916	48.7997	113.733	107.601	127.485	115.405
ENSDARG00000005414	104.44	1.15407	0.213113	5.41531	6.11817e-08	1.39715e-06	FALSE	83.403	87.8421	61.3569	64.2902	200.691	123.02	192.703	141.186
ENSDARG00000105255	1455.49	0.458636	0.0847695	5.41038	6.28907e-08	1.43487e-06	FALSE	1101.58	1393.24	1114.43	1263.65	1583.12	1747.93	1712.96	1658.99
ENSDARG00000040004	39.9099	-1.6608	0.307123	-5.40761	6.38726e-08	1.45462e-06	FALSE	41.6634	60.5585	60.2715	71.3865	26.512	10.6745	14.6292	22.3182
ENSDARG00000091234	244.768	2.56812	0.4749	5.4077	6.38386e-08	1.45462e-06	FALSE	114.468	74.8961	99.4941	74.4455	1052.58	275.812	625.417	198.128
ENSDARG00000058248	295.718	-0.890771	0.164802	-5.40509	6.47748e-08	1.47383e-06	FALSE	334.809	341.369	343.171	379.475	150.042	203.393	142.289	256.777
ENSDARG00000007034	1982.01	0.502033	0.092899	5.40408	6.51425e-08	1.48086e-06	FALSE	1463.32	1407.24	1439.71	1466.33	1714.64	1958.81	2146.06	2356.64
ENSDARG00000105046	419.101	0.596833	0.110484	5.40199	6.59058e-08	1.49685e-06	FALSE	342.143	338.126	284.424	280.365	411.92	485.664	448.594	526.984
ENSDARG00000070165	146.383	1.31057	0.242676	5.4005	6.64541e-08	1.50794e-06	FALSE	64.5592	72.6652	88.7638	98.172	262.702	131.356	232.597	185.589
ENSDARG00000099298	377.332	-0.560185	0.103742	-5.39978	6.67238e-08	1.51223e-06	FALSE	407.175	473.454	428.729	450.861	268.121	310.788	293.249	321.298
ENSDARG00000090899	254.233	-3.27602	0.606708	-5.39967	6.67639e-08	1.51223e-06	FALSE	415.862	714.926	697.323	547.148	6.93563	134.74	53.8285	49.7171
ENSDARG00000079542	861.452	0.441329	0.0818257	5.39352	6.90892e-08	1.56349e-06	FALSE	671.202	756.943	768.79	738.85	1108.79	975.685	998.648	913.783
ENSDARG00000104519	30.9198	5.88666	1.09156	5.3929	6.93285e-08	1.56749e-06	FALSE	1.46692	0	0.993789	0	5.91296	35.1514	31.6574	55.1938
ENSDARG00000093926	5.9523	-6.72314	1.24685	-5.39208	6.96482e-08	1.5733e-06	FALSE	26.3705	21.47	11.3303	11.2299	0	0	0	0
ENSDARG00000076780	1346.73	-0.393873	0.0730748	-5.38999	7.0462e-08	1.59025e-06	FALSE	1595.58	1660.74	1636.6	1576.97	1348.12	1208.91	1200.77	1169.49
ENSDARG00000022493	39.6165	-2.71523	0.503827	-5.38921	7.07662e-08	1.59568e-06	FALSE	115.599	69.2641	101.095	91.8391	29.7814	17.8441	6.20289	4.39887
ENSDARG00000075521	250.13	-1.04315	0.193594	-5.38831	7.11237e-08	1.6023e-06	FALSE	257.893	310.123	356.502	305.811	84.3847	158.747	163.99	189.034
ENSDARG00000088030	19068.5	0.425479	0.0790191	5.38451	7.26435e-08	1.63506e-06	FALSE	17039.3	16892.1	17127.5	17121.9	26747	21343.3	23224.8	20257.8
ENSDARG00000017444	487.368	-1.07185	0.199075	-5.38415	7.27891e-08	1.63687e-06	FALSE	616.646	800.192	748.626	766.206	206.091	479.134	335.892	373.825
ENSDARG00000053068	567.678	-1.00025	0.185808	-5.38323	7.31599e-08	1.64374e-06	FALSE	923.84	1002.66	827.451	786.895	271.096	429.52	595.821	471.809
ENSDARG00000059362	858.546	-0.56923	0.105747	-5.38296	7.32705e-08	1.64475e-06	FALSE	1057.67	1064.84	1027.41	938.056	589.878	674.208	756.567	730.941
ENSDARG00000039882	814.016	0.613523	0.113994	5.38205	7.36413e-08	1.65159e-06	FALSE	659.366	517.527	663.231	566.547	960.558	889.87	912.331	915.043
ENSDARG00000045555	177.684	-0.719507	0.133721	-5.38065	7.4219e-08	1.66306e-06	FALSE	211.705	236.283	207.628	224.609	135.172	149.196	121.933	129.371
ENSDARG00000076679	2162.83	0.341049	0.063427	5.37703	7.57242e-08	1.69527e-06	FALSE	1777.51	1893.75	1929.05	2075.65	2423.8	2321.11	2509.06	2480.75
ENSDARG00000042646	1039.32	0.402174	0.0748107	5.3759	7.62022e-08	1.70446e-06	FALSE	935.969	863.781	852.191	922.533	1154.92	1272.45	1121.23	1172.24
ENSDARG00000013561	3942.73	-0.348355	0.0648222	-5.374	7.70096e-08	1.72098e-06	FALSE	4449.45	4567.38	4577.73	4645.97	3557.42	3399.48	4004.27	3370.4
ENSDARG00000022904	1121.58	0.409889	0.0763179	5.37081	7.83832e-08	1.75012e-06	FALSE	1017.6	972.588	861.286	989.845	1362.4	1246.84	1262.65	1226.43
ENSDARG00000071429	1083.96	-2.52182	0.469862	-5.36714	7.99938e-08	1.78449e-06	FALSE	1713.27	2033.23	2294.98	2400.78	125.9	814.337	279.254	250.87
ENSDARG00000101423	2228.52	-0.953551	0.177704	-5.36596	8.05204e-08	1.79464e-06	FALSE	2986.5	3041.18	3293.05	3324.01	969.947	1494.4	2325.09	1738.87
ENSDARG00000103199	1050.76	1.98816	0.370562	5.36525	8.08365e-08	1.80008e-06	FALSE	487.636	329.99	534.622	722.406	3251.5	1078.83	2139.26	1761.84
ENSDARG00000100417	21.3443	4.1948	0.781903	5.36486	8.10112e-08	1.80237e-06	FALSE	1.45583	1.07376	4.90247	0	35.3088	61.7202	29.0088	11.2658
ENSDARG00000074908	7451.75	-0.505151	0.0941835	-5.36348	8.16331e-08	1.8146e-06	FALSE	8540.48	9565.49	9206.46	8264.28	5632.29	5432.91	7185.83	6812.96
ENSDARG00000100742	3136.45	0.508198	0.0948141	5.35994	8.32512e-08	1.84893e-06	FALSE	2702.23	2764.24	2796.4	2785.41	4345.45	3611.55	4482.3	3279.75
ENSDARG00000076904	164.663	1.09019	0.203442	5.35871	8.38169e-08	1.85984e-06	FALSE	132.839	126.528	110.368	126.505	339.895	278.876	227.265	210.399
ENSDARG00000057782	4654.98	0.365314	0.0681999	5.35652	8.48408e-08	1.87592e-06	FALSE	4146.77	3921.52	4044.19	4012.73	5186.44	5094.27	5574.65	4914.88
ENSDARG00000043394	413.434	-0.74687	0.139422	-5.35691	8.46564e-08	1.87592e-06	FALSE	484.692	504.573	470.046	571.403	246.64	381.376	249.781	332.378
ENSDARG00000003991	335.631	-1.1439	0.213551	-5.35656	8.48233e-08	1.87592e-06	FALSE	391.452	379.535	426.411	417.96	102.918	183.397	156.243	284.593
ENSDARG00000041107	259.234	1.19668	0.223396	5.35675	8.47319e-08	1.87592e-06	FALSE	187.648	212.612	161.571	198.173	653.81	403.54	425.158	261.467
ENSDARG00000021494	391.452	-0.59229	0.110626	-5.354	8.60294e-08	1.90053e-06	FALSE	505.996	505.885	555.635	549.82	317.121	369.074	396.958	323.081
ENSDARG00000062008	670.25	0.94275	0.176191	5.35073	8.76002e-08	1.93353e-06	FALSE	538.805	471.667	484.049	541.844	1184.5	1264.05	848.215	619.587
ENSDARG00000073820	62.7725	2.98796	0.558449	5.35047	8.77272e-08	1.93463e-06	FALSE	17.5591	32.1369	7.91752	16.2994	379.748	41.0037	67.8523	97.1088
ENSDARG00000010602	62.145	1.27694	0.238729	5.34891	8.8487e-08	1.94967e-06	FALSE	44.0076	31.0338	35.7904	34.4862	73.8983	106.248	77.7367	90.9088
ENSDARG00000096587	8.59621	6.66003	1.24586	5.34575	9.00445e-08	1.98224e-06	FALSE	0	0	0	0	44.648	13.9517	10.3326	13.1276
ENSDARG00000014817	3674.9	-0.633863	0.118584	-5.34527	9.02826e-08	1.98574e-06	FALSE	4487.47	4208.8	4231.75	4082.73	2012.29	2911.79	2710.71	3326.07
ENSDARG00000054060	1742.31	-0.758572	0.141977	-5.34291	9.14669e-08	2.01003e-06	FALSE	2269.48	2210.37	2081.09	2191.46	1115.29	948.754	1684.72	1423.01
ENSDARG00000030743	293.606	-0.656049	0.1228	-5.34244	9.17055e-08	2.01351e-06	FALSE	431.782	416.405	406.17	365.099	268.295	206.401	285.458	264.935
ENSDARG00000095751	47.5969	-1.92267	0.359964	-5.34129	9.22852e-08	2.02446e-06	FALSE	39.5167	76.0505	88.1174	106.873	10.8233	32.4067	13.5694	25.3922
ENSDARG00000043010	1259.82	-0.819342	0.153431	-5.34013	9.28816e-08	2.03576e-06	FALSE	1415.34	1360.63	1653.06	1720.54	591.333	953.479	817.953	1122.38
ENSDARG00000013461	266.204	-0.627035	0.117442	-5.33909	9.34152e-08	2.04567e-06	FALSE	374.295	351.491	307.979	315.594	241.007	210.715	198.622	219.62
ENSDARG00000006266	1655.18	0.518936	0.0972131	5.33813	9.39098e-08	2.05471e-06	FALSE	1383.61	1438.78	1500.65	1463.12	2004.79	1990.87	2461.96	1838.2
ENSDARG00000086277	72.8671	-1.47695	0.2767	-5.33773	9.41197e-08	2.05751e-06	FALSE	107.681	123.962	118.788	91.5736	18.8093	43.9352	53.1412	42.1787
ENSDARG00000105136	425.601	0.632265	0.118481	5.33645	9.47861e-08	2.07027e-06	FALSE	353.435	274.42	339.378	375.779	589.755	508.335	533.611	452.972
ENSDARG00000007976	1759.8	0.473828	0.0888736	5.33149	9.74127e-08	2.12544e-06	FALSE	1516.49	1528.72	1602.23	1585.78	2487.23	2166.44	2161.88	1851.97
ENSDARG00000100677	369.619	-0.596258	0.11184	-5.33136	9.74815e-08	2.12544e-06	FALSE	410.033	446.715	458.334	498.338	292.093	307.773	267.16	334.994
ENSDARG00000099137	268.231	-0.754608	0.141563	-5.33053	9.7927e-08	2.1333e-06	FALSE	331.739	354.319	295.854	344.176	183.33	226.754	148.657	226.1
ENSDARG00000054543	1074.84	0.466855	0.0875844	5.33035	9.80239e-08	2.13355e-06	FALSE	858.978	870.007	969.094	904.279	1145.67	1213.46	1420.4	1203.01
ENSDARG00000000796	1453.71	-0.71579	0.134377	-5.32674	9.9992e-08	2.1745e-06	FALSE	1486.53	1880.51	1261.26	1699.08	772.536	1091.5	907.678	1080.68
ENSDARG00000036036	9454.4	0.450731	0.0846448	5.32497	1.00968e-07	2.19383e-06	FALSE	8505.66	8521.09	8230.88	7845.43	11834.7	10329	13061.5	10014.9
ENSDARG00000104347	4843.64	0.554992	0.104304	5.32091	1.03251e-07	2.24149e-06	FALSE	4009.81	4267.19	4126.66	4586.44	6411.91	7109.71	6456.34	4992.07
ENSDARG00000060927	200.269	1.38809	0.260926	5.31987	1.03839e-07	2.25231e-06	FALSE	158.963	111.569	81.6025	143.508	374.955	225.793	480.977	212.171
ENSDARG00000007823	781.722	2.36899	0.445735	5.31479	1.06779e-07	2.31408e-06	FALSE	332.231	290.797	368.347	316.662	2664.16	819.558	2675.39	598.555
ENSDARG00000044415	52.3609	1.79024	0.336888	5.31406	1.07206e-07	2.32132e-06	FALSE	23.0908	28.1755	19.0957	32.4531	103.994	74.8643	124.923	54.7146
ENSDARG00000053131	58.7299	2.35937	0.444121	5.31246	1.08158e-07	2.33991e-06	FALSE	13.128	27.8876	19.6819	30.7021	260.204	93.1043	66.114	55.4485
ENSDARG00000100894	123.028	1.37939	0.259709	5.31128	1.08856e-07	2.35298e-06	FALSE	61.8578	77.9995	86.176	75.6557	233.178	142.889	289.675	123.154
ENSDARG00000068996	2135.19	0.673773	0.126937	5.30795	1.10867e-07	2.39439e-06	FALSE	1809.59	1633.51	1710.08	1753.95	3679.93	2604.04	2486.09	2250.37
ENSDARG00000055760	1225.82	-0.447897	0.0844004	-5.30681	1.1156e-07	2.40728e-06	FALSE	1427.5	1473.51	1315.38	1397.92	1138.03	920.283	1019.36	1036.96
ENSDARG00000002394	100.071	-1.76926	0.333609	-5.30338	1.13677e-07	2.45086e-06	FALSE	181.312	182.163	185.817	159.269	13.7671	80.2215	54.2954	59.0545
ENSDARG00000099156	692.286	0.394803	0.0744726	5.30132	1.14965e-07	2.47649e-06	FALSE	577.722	571.66	589.638	614.126	761.047	782.974	797.855	755.932
ENSDARG00000097091	6.9802	-6.83664	1.29003	-5.29961	1.1605e-07	2.49772e-06	FALSE	13.1369	14.8681	22.7878	24.3768	0	0	0	0
ENSDARG00000056453	183.896	1.21412	0.229144	5.29849	1.16765e-07	2.51095e-06	FALSE	114.238	117.478	122.42	121.994	275.449	165.501	423.517	240.778
ENSDARG00000078419	133.792	-1.24055	0.234144	-5.29823	1.16932e-07	2.51238e-06	FALSE	154.344	219.58	212.523	179.957	113.167	100.508	67.5671	48.0954
ENSDARG00000009001	3133.37	-0.443556	0.0837279	-5.29758	1.17344e-07	2.51909e-06	FALSE	3517.9	4014.26	3465.88	3307.67	2734.12	2391.39	2682.33	2709.44
ENSDARG00000037836	22.6851	-2.29592	0.433478	-5.29651	1.18038e-07	2.5318e-06	FALSE	37.1848	30.3801	44.1679	56.2521	12.0325	13.6284	4.27491	4.95647
ENSDARG00000057365	216.886	-0.793988	0.149935	-5.29555	1.18659e-07	2.54079e-06	FALSE	280.15	296.475	244.977	291.004	164.229	202.058	137.812	139.221
ENSDARG00000045299	111.414	-1.4005	0.264464	-5.29562	1.18615e-07	2.54079e-06	FALSE	140.708	161.645	180.67	190.442	27.5747	89.3251	58.7713	79.0506
ENSDARG00000037747	1209.53	-0.472623	0.0892705	-5.29428	1.19485e-07	2.5541e-06	FALSE	1373.98	1285.03	1324.31	1351.88	972.735	974.831	801.207	1092.58
ENSDARG00000095252	57.4803	2.59991	0.491072	5.29436	1.19436e-07	2.5541e-06	FALSE	29.8911	11.4969	15.9483	33.1539	234.717	155.767	121.365	28.8345
ENSDARG00000091627	48.6131	-2.51939	0.475919	-5.29374	1.19838e-07	2.55948e-06	FALSE	137.564	156.026	49.6955	80.0463	28.4173	13.2067	28.2061	4.48905
ENSDARG00000093054	133.176	-1.5678	0.29621	-5.29286	1.2042e-07	2.5697e-06	FALSE	191.269	207.792	181.115	223.951	36.8937	66.0899	71.922	95.5286
ENSDARG00000062479	1041.44	0.438558	0.0828674	5.29229	1.20795e-07	2.57553e-06	FALSE	891.275	808.765	891.812	883.125	1118.35	1302.23	1078.76	1209.26
ENSDARG00000067920	404.614	-0.636151	0.120246	-5.29043	1.22028e-07	2.59959e-06	FALSE	485.655	491.285	446.644	476.714	270.977	286.133	290.737	370.967
ENSDARG00000053091	1628.9	0.723801	0.136856	5.28879	1.23128e-07	2.61912e-06	FALSE	1424.5	1285.74	1329.68	1453.16	2340.84	2087.32	2980.17	1665.25
ENSDARG00000104472	236.309	1.35164	0.255569	5.28875	1.23153e-07	2.61912e-06	FALSE	173.305	127.211	142.525	194.41	489.984	317.561	603.238	217.155
ENSDARG00000077169	295.691	2.57229	0.486514	5.28717	1.2422e-07	2.63957e-06	FALSE	152.916	108.402	97.1467	61.3174	1397.83	340.916	371.526	380.492
ENSDARG00000020387	270.534	-0.822097	0.155504	-5.28666	1.24572e-07	2.6448e-06	FALSE	331.707	352.419	398.58	373.956	149.064	245.418	233.445	196.673
ENSDARG00000005221	421.065	-0.963549	0.182312	-5.28516	1.25593e-07	2.66423e-06	FALSE	526.726	572.141	656.103	587.05	179.67	376.184	317.562	327.397
ENSDARG00000053159	437.761	-0.840021	0.158957	-5.2846	1.25983e-07	2.67024e-06	FALSE	607.404	557.529	614.18	526.007	216.149	301.728	352.188	413.964
ENSDARG00000038865	610.53	-0.69492	0.131519	-5.28382	1.2652e-07	2.67936e-06	FALSE	756.843	877.163	876.283	793.985	360.58	573.759	569.792	536.857
ENSDARG00000101624	4528.91	-0.375913	0.0711626	-5.28245	1.27465e-07	2.69708e-06	FALSE	4986.45	5176.93	4538.39	5050.5	3825.57	3637.15	3546.72	4207
ENSDARG00000098103	2734.37	0.482614	0.0913889	5.28088	1.28563e-07	2.71803e-06	FALSE	2333.4	2575.94	2066.22	2628.73	3142.91	3666.2	3592.28	3022.93
ENSDARG00000063079	175.808	-0.739712	0.140096	-5.28005	1.29147e-07	2.72807e-06	FALSE	206.053	215.045	209.269	194.637	146.281	123.592	99.9372	124.817
ENSDARG00000034862	193.611	-0.976765	0.185004	-5.2797	1.29397e-07	2.73107e-06	FALSE	283.298	273.389	274.129	291.055	91.3796	157.048	191.929	129.487
ENSDARG00000017794	1293.03	-0.455648	0.0863317	-5.27787	1.30693e-07	2.75609e-06	FALSE	1705.15	1676.89	1534.64	1686.55	1109.01	1198.07	1382.15	1124.58
ENSDARG00000077297	1734.63	0.483922	0.0917347	5.27524	1.32584e-07	2.79363e-06	FALSE	1441.41	1428.73	1384.51	1720.54	2023.45	1996.24	2383.04	1957.45
ENSDARG00000097902	693.417	-0.962723	0.182523	-5.27454	1.33088e-07	2.80189e-06	FALSE	938.477	941.608	968.063	763.29	472.873	265.286	557.998	557.454
ENSDARG00000053449	417.369	0.87597	0.166083	5.27428	1.33275e-07	2.80348e-06	FALSE	333.271	254.262	392.108	301.719	701.453	470.91	708.515	471.661
ENSDARG00000029036	294.712	0.683334	0.129572	5.27376	1.3366e-07	2.80921e-06	FALSE	260.14	208.032	244.063	228.486	394.629	322.343	441.694	348.771
ENSDARG00000021137	1246.56	0.418466	0.0793705	5.27231	1.34716e-07	2.82904e-06	FALSE	1018.14	1046.49	984.363	1101.06	1325.98	1399.41	1475.06	1349.13
ENSDARG00000098777	1253.52	-0.787036	0.14931	-5.27114	1.35579e-07	2.84477e-06	FALSE	1537.46	1515.91	1638.99	1372.59	712.493	657.992	1121.01	1019.64
ENSDARG00000098668	16.8618	2.49955	0.474254	5.27049	1.36064e-07	2.85256e-06	FALSE	5.85551	8.56836	3.96178	6.34103	52.155	33.3459	31.6598	23.1471
ENSDARG00000102305	691.465	0.489845	0.0929602	5.2694	1.36867e-07	2.86701e-06	FALSE	556.259	540.108	535.458	559.986	823.204	676.918	859.309	719.257
ENSDARG00000020197	29952.9	0.56024	0.106376	5.26661	1.38964e-07	2.90851e-06	FALSE	25528.1	24679.5	25994.8	26116.4	46974.1	35098	38536.5	30267.2
ENSDARG00000052118	357.817	1.19098	0.226189	5.26543	1.3986e-07	2.9248e-06	FALSE	285.084	231.949	218.33	229.683	714.545	340.852	745.183	399.749
ENSDARG00000068995	8365.65	0.630258	0.119708	5.26498	1.40205e-07	2.92959e-06	FALSE	7500.85	6911.07	6629.39	6549.44	14046.9	9783.28	9733.35	9140.81
ENSDARG00000096739	143.949	-1.33598	0.253803	-5.26383	1.41084e-07	2.9455e-06	FALSE	217.494	204.808	237.467	274.684	57.9572	155.267	81.491	76.3764
ENSDARG00000102506	1772.59	0.527501	0.100279	5.26034	1.4379e-07	2.99949e-06	FALSE	1397.61	1543.91	1427.27	1537.18	2473.77	1849.04	2251.06	1944.28
ENSDARG00000005924	4734.1	0.440931	0.0838289	5.25989	1.44145e-07	3.00439e-06	FALSE	3772.39	3971.13	4154.44	4490.81	6226.38	5126.24	5901.85	5005.58
ENSDARG00000076128	3594.37	0.38895	0.0739521	5.25948	1.4446e-07	3.00847e-06	FALSE	3169.65	3230.47	3227.21	3170.26	4717.2	4006.46	4346.1	3693.44
ENSDARG00000006316	30324.6	0.325629	0.0619201	5.25886	1.44947e-07	3.01611e-06	FALSE	28755.1	27257	28218.4	28057.3	36060.3	34126.6	38428.9	32105.4
ENSDARG00000095826	563.431	0.51576	0.0980887	5.2581	1.45549e-07	3.02612e-06	FALSE	508.492	456.857	481.094	446.928	725.236	641.651	733.499	603.768
ENSDARG00000018334	29672.1	0.3388	0.0644718	5.25502	1.48011e-07	3.07476e-06	FALSE	27558.8	27476.3	26395.8	28189	37293.7	32764.9	36962.4	31620.5
ENSDARG00000104110	1045.68	-0.58488	0.111468	-5.24705	1.54552e-07	3.20798e-06	FALSE	1158.12	1401.32	1239.2	1067.96	735.344	811.977	867.528	828.146
ENSDARG00000094965	1802.42	0.680244	0.129724	5.24379	1.57308e-07	3.26185e-06	FALSE	1558.29	1367.89	1398.91	1278.49	2657.78	1645.2	2445.6	2224.96
ENSDARG00000087784	317.631	0.762105	0.145338	5.24368	1.57408e-07	3.26185e-06	FALSE	283.851	230.321	236.504	235.42	535.164	350.971	356.46	425.069
ENSDARG00000074983	41.4943	6.17643	1.17812	5.24263	1.58303e-07	3.27769e-06	FALSE	0	3.21492	1.98475	0.907102	62.0699	21.9023	304.116	65.7208
ENSDARG00000060748	643.899	-0.445708	0.0850521	-5.2404	1.60226e-07	3.31477e-06	FALSE	705.179	711.869	730.322	731.352	588.273	535.111	496.054	498.32
ENSDARG00000031657	299.542	-0.761023	0.14526	-5.23906	1.614e-07	3.33356e-06	FALSE	424.847	357.108	487.052	400.082	248.624	284.277	202.326	249.841
ENSDARG00000102895	24.496	3.00041	0.572698	5.23907	1.61384e-07	3.33356e-06	FALSE	7.37387	4.27396	8.0477	3.65937	54.4226	9.35627	54.9699	65.143
ENSDARG00000002758	4716.35	0.557301	0.106392	5.2382	1.62148e-07	3.34625e-06	FALSE	3790.65	3709.79	4185.63	4447.93	6538.09	6153.02	6449.08	4610.9
ENSDARG00000104108	1496.97	-0.759357	0.145028	-5.23592	1.64163e-07	3.38505e-06	FALSE	1943.35	2056.26	2068.57	2149.97	852.931	1076.64	1539.21	1384.03
ENSDARG00000071691	5439.71	-0.347751	0.0664255	-5.2352	1.64802e-07	3.39544e-06	FALSE	6291.98	6346.92	6110.37	5913.62	4797.47	5384.28	4601.15	4597.56
ENSDARG00000068729	76.3961	-1.30958	0.250587	-5.22605	1.73172e-07	3.56496e-06	FALSE	110.945	160.985	130.631	136.534	35.741	78.8071	63.6043	40.1288
ENSDARG00000018146	846.504	-0.543632	0.104072	-5.22363	1.75454e-07	3.60897e-06	FALSE	1006.83	911.53	1158.5	1110.96	725.058	724.424	669.255	755.757
ENSDARG00000019420	4225	0.514536	0.0985068	5.22335	1.7571e-07	3.61128e-06	FALSE	3520.38	3255.65	3642.05	4132.89	5778.58	4728.93	5791.21	4494.99
ENSDARG00000045487	16009.3	0.320373	0.061361	5.22111	1.77853e-07	3.65231e-06	FALSE	14769.5	14952.2	14871.4	14801.6	19613.6	18371.8	19491.2	16693.2
ENSDARG00000053668	6250.9	0.395067	0.0756897	5.21957	1.79341e-07	3.67987e-06	FALSE	5527.7	5475.35	5172.4	5628.34	7914.72	6650.03	7631.75	6478.8
ENSDARG00000035871	20840.8	0.376746	0.072195	5.21846	1.80421e-07	3.699e-06	FALSE	19427.9	18280.4	19178.6	18826.1	28346.1	23419.1	24042	22501.7
ENSDARG00000005651	1432.09	0.478615	0.091724	5.21799	1.80873e-07	3.70523e-06	FALSE	1182.13	1281.41	1113.51	1247.62	1577.62	1667.13	1647.6	1828.55
ENSDARG00000075027	44.7233	2.09177	0.400979	5.21665	1.82187e-07	3.72911e-06	FALSE	13.1979	17.1245	31.7943	8.16535	104.421	42.7186	74.1297	79.7579
ENSDARG00000055185	207.478	-1.45212	0.27847	-5.21463	1.84182e-07	3.76687e-06	FALSE	349.24	376.212	345.536	334.637	51.1147	210.385	148.44	103.972
ENSDARG00000056888	393.034	1.07946	0.207024	5.21418	1.84634e-07	3.77303e-06	FALSE	230.347	236.389	335.707	271.379	798.203	431.784	584.083	459.998
ENSDARG00000057918	1447.01	0.48437	0.0929115	5.21324	1.85573e-07	3.78913e-06	FALSE	1231.75	1171.64	1310.55	1297.73	2064.02	1650.8	1778.75	1524.12
ENSDARG00000068191	340.269	-0.617682	0.118492	-5.21287	1.85943e-07	3.7936e-06	FALSE	408.026	438.709	402.931	469.927	234.267	313.693	316.62	258.101
ENSDARG00000103025	2506.26	-0.559509	0.107355	-5.21179	1.87026e-07	3.81258e-06	FALSE	2960.08	3879.91	3316	3171.9	2005.31	2387.74	2619.96	2032.84
ENSDARG00000004588	9859.04	0.533789	0.102456	5.20992	1.88918e-07	3.84803e-06	FALSE	9019.33	8192.9	7957.15	8097.39	15173.8	11097.5	10579	11307.5
ENSDARG00000075178	1015.71	-0.412998	0.0792832	-5.20915	1.89704e-07	3.86091e-06	FALSE	1138.97	1263.21	1217.98	1187.68	916.25	866.558	983.153	848.709
ENSDARG00000074760	298.934	-0.757324	0.145529	-5.20394	1.95104e-07	3.9676e-06	FALSE	370.464	418.538	344.08	430.5	183.266	285.781	240.116	216.958
ENSDARG00000057125	477.886	-0.541047	0.103979	-5.20344	1.95636e-07	3.97518e-06	FALSE	612.608	601.485	581.268	585.518	333.193	439.471	445.974	415.671
ENSDARG00000052304	8054.81	-0.365118	0.0701844	-5.20226	1.96877e-07	3.99717e-06	FALSE	9046.64	9475.39	9283.58	9026.14	6837.39	8164.15	6701.56	6895.67
ENSDARG00000059805	72.2156	1.66654	0.320468	5.20032	1.98947e-07	4.03591e-06	FALSE	48.2609	48.2162	45.4803	32.5829	150.471	151.793	176.449	73.9923
ENSDARG00000040439	7561	0.440923	0.0847954	5.19984	1.9946e-07	4.04306e-06	FALSE	6625.67	6548.44	7101.18	6845.9	9512.78	8341.69	10767.6	8199.32
ENSDARG00000070849	17730.6	0.345471	0.0664466	5.19923	2.00118e-07	4.05311e-06	FALSE	16860.6	16044.1	16248.5	16361.5	22712	20217.5	21793.6	18519.6
ENSDARG00000014246	96.4487	-0.955779	0.183857	-5.19848	2.00923e-07	4.06614e-06	FALSE	139.701	136.35	121.51	136.968	53.9258	76.2031	72.5119	72.1005
ENSDARG00000100592	337.129	0.801929	0.154292	5.19749	2.02e-07	4.08464e-06	FALSE	173.248	224.348	186.334	199.224	268.722	390.298	313.567	394.128
ENSDARG00000039117	7539.74	0.402028	0.0773533	5.1973	2.02207e-07	4.08552e-06	FALSE	6740.79	6582.79	6843.54	7131.48	9057.28	9118.31	10016	7885.53
ENSDARG00000055160	36.8242	-1.52821	0.294114	-5.19598	2.0364e-07	4.11116e-06	FALSE	65.5148	72.9931	52.9591	77.5267	31.3838	20.2372	15.4064	26.2749
ENSDARG00000007320	44078.9	0.349257	0.0672242	5.19541	2.04274e-07	4.12066e-06	FALSE	40052.7	39344	41847.7	41266.6	55510.9	48791.1	56000.1	46728.7
ENSDARG00000061981	793.428	-0.482552	0.0929075	-5.1939	2.05936e-07	4.14787e-06	FALSE	927.915	992.068	942.148	887.823	731.615	693.648	584.115	674.979
ENSDARG00000098058	462.424	-2.09838	0.40401	-5.19388	2.05954e-07	4.14787e-06	FALSE	948.797	792.17	710.369	883.114	220.832	59.7769	252.011	245.619
ENSDARG00000070442	3663.38	0.36651	0.0705777	5.193	2.06931e-07	4.1642e-06	FALSE	3006.6	3122.52	3043.95	3628.56	4197.64	4290.41	4098.56	3929.56
ENSDARG00000099821	211.071	-1.54526	0.29758	-5.19277	2.07193e-07	4.16612e-06	FALSE	319.413	364.058	376.202	318.15	51.5759	217.172	86.406	118.558
ENSDARG00000006031	3136.17	0.622769	0.119938	5.19241	2.07587e-07	4.1707e-06	FALSE	2484.75	2796.4	2803.75	3131.47	4120.65	4757.26	5115.04	3288.23
ENSDARG00000014004	1646.92	0.548682	0.105706	5.19062	2.09594e-07	4.20766e-06	FALSE	1429.74	1392.62	1420.18	1422.7	2550.73	1787.67	2119.52	1830.62
ENSDARG00000061081	748.551	1.21884	0.234903	5.18871	2.1176e-07	4.24774e-06	FALSE	556.576	597.714	513.627	499.757	2012.46	1030.44	1372.62	630.872
ENSDARG00000061120	4229.74	0.896098	0.17272	5.18815	2.12397e-07	4.25711e-06	FALSE	2948.92	3609.76	3213.4	3649.42	6065.12	6075.03	8887.54	3956.24
ENSDARG00000074677	1249.56	-0.783221	0.151037	-5.18561	2.15306e-07	4.31196e-06	FALSE	1806.5	1317.98	1122.56	1321.88	842.48	732.341	721.668	931.212
ENSDARG00000028507	2778.53	-0.675024	0.130193	-5.18478	2.16268e-07	4.32777e-06	FALSE	3830.88	2982.43	3059.28	4233.32	2235.46	1749.19	2341.06	2507.17
ENSDARG00000074169	1243.82	-0.516003	0.0995871	-5.18143	2.20192e-07	4.40278e-06	FALSE	1499.76	1379.82	1380.75	1319.68	887.116	1086.03	829.461	1094.68
ENSDARG00000024654	374.071	-0.54391	0.10499	-5.18057	2.21207e-07	4.41955e-06	FALSE	461.897	457.128	440.016	425.807	299.28	308.806	299.888	314.293
ENSDARG00000098278	115.846	-1.35893	0.262341	-5.17999	2.21896e-07	4.42979e-06	FALSE	124.985	196.577	139.799	168.311	41.1462	74.4785	71.6372	58.6572
ENSDARG00000036875	49341.3	0.400512	0.0773472	5.17811	2.2415e-07	4.46763e-06	FALSE	46007.5	43055.4	45295.9	44205.8	67190.7	55352.8	61406.5	51753.3
ENSDARG00000022020	279.89	-0.745576	0.143987	-5.17806	2.24202e-07	4.46763e-06	FALSE	292.285	370.51	372.86	343.099	238.146	221.232	160.472	205.183
ENSDARG00000053845	17.1363	-3.85974	0.745418	-5.17796	2.24326e-07	4.46763e-06	FALSE	33.8158	37.3941	46.945	54.5678	0	11.3114	0.902567	0
ENSDARG00000042978	424.282	-0.742196	0.143424	-5.17485	2.28099e-07	4.53917e-06	FALSE	584.517	592.243	588.732	620.88	258.129	426.791	423.049	319.423
ENSDARG00000034174	367.738	-0.588452	0.113765	-5.17251	2.30972e-07	4.59269e-06	FALSE	529.586	481.024	502.567	454.486	321.661	324.36	377.287	284.664
ENSDARG00000040159	638.262	0.989144	0.191248	5.17204	2.31547e-07	4.60047e-06	FALSE	514.919	499.045	426.003	491.317	1491.45	869.992	709.197	763.186
ENSDARG00000101576	406.258	0.703879	0.136099	5.17181	2.31833e-07	4.60251e-06	FALSE	277.959	291.298	323.673	351.033	593.154	586.597	441.005	413.433
ENSDARG00000008306	2034.7	-0.692391	0.133918	-5.17025	2.33776e-07	4.63743e-06	FALSE	2217.75	2417.29	2162.21	2395.6	1185.92	1774.29	1089.87	1637.87
ENSDARG00000103848	376.05	-0.614071	0.118782	-5.16972	2.34449e-07	4.6471e-06	FALSE	488.759	383.084	458.686	470.255	282.284	321.001	277.655	293.51
ENSDARG00000090185	1368.01	-0.643211	0.124504	-5.16618	2.38921e-07	4.732e-06	FALSE	1658.51	1929.76	1902.94	1946.2	975.857	1315.1	1481.19	993.236
ENSDARG00000039997	2125.47	0.662271	0.128227	5.16483	2.40657e-07	4.75959e-06	FALSE	1886.66	1658.21	1920.65	1678.48	3379.15	2446.89	3241.91	2236.45
ENSDARG00000043171	113.615	-1.34539	0.260492	-5.1648	2.40694e-07	4.75959e-06	FALSE	166.861	290.268	210.916	128.618	83.6383	83.8634	93.1744	53.7678
ENSDARG00000031426	330.537	0.817183	0.15825	5.16386	2.41904e-07	4.77598e-06	FALSE	176.216	309.109	273.772	207.395	381.582	429.525	490.235	407.514
ENSDARG00000069780	195.379	1.09167	0.2114	5.16397	2.41768e-07	4.77598e-06	FALSE	154.397	139.668	103.919	95.3268	242.29	339.955	195.084	266.669
ENSDARG00000091864	19.0698	2.71243	0.525298	5.1636	2.42248e-07	4.77901e-06	FALSE	4.42782	3.20835	9.07711	4.59026	62.4008	25.2142	29.6773	24.4257
ENSDARG00000025788	542.558	0.739075	0.143163	5.16247	2.43706e-07	4.804e-06	FALSE	423.378	318.451	466.199	445.52	858.637	582.535	696.257	625.14
ENSDARG00000012915	812.192	-0.491733	0.0952649	-5.16174	2.44659e-07	4.81324e-06	FALSE	932.908	994.84	1029.64	869.053	585.354	707.966	710.894	715.108
ENSDARG00000088515	138.48	-0.728687	0.141167	-5.16189	2.44474e-07	4.81324e-06	FALSE	172.175	191.972	151.634	171.617	95.2623	111.271	106.858	101.126
ENSDARG00000102299	92.5753	2.34663	0.454625	5.16167	2.44751e-07	4.81324e-06	FALSE	36.8827	44.8885	56.3879	24.7373	450.484	96.2555	212.54	70.2882
ENSDARG00000054155	5099.37	-0.546307	0.105869	-5.16022	2.46664e-07	4.84706e-06	FALSE	5701.14	5759.42	5499.61	5532.63	3745.84	3875.1	3116.91	4660.69
ENSDARG00000097193	283.978	-0.993355	0.192593	-5.1578	2.49865e-07	4.90612e-06	FALSE	324.351	362.94	432.354	419.452	135.811	251.672	160.573	225.73
ENSDARG00000019130	699.378	0.631369	0.122431	5.15692	2.51045e-07	4.92543e-06	FALSE	517.546	561.093	663.616	558.689	985.499	715.89	1025.41	842.667
ENSDARG00000036298	19579.8	0.384396	0.0745525	5.15604	2.52225e-07	4.94085e-06	FALSE	17669.4	17167.9	17895	18264.8	26224.8	22552	23574.2	20329.8
ENSDARG00000032725	44724.1	0.397467	0.0770854	5.15618	2.52035e-07	4.94085e-06	FALSE	40891.2	39608.4	40552.4	41253	58513.5	50220.4	58538.7	46519.2
ENSDARG00000038858	1328.67	0.396297	0.0768908	5.15403	2.54951e-07	4.98874e-06	FALSE	1125.8	1156.99	1173.58	1192.09	1691.2	1488	1581.56	1364.25
ENSDARG00000079530	566.865	0.828712	0.160795	5.15386	2.55182e-07	4.98874e-06	FALSE	464.414	475.481	449.03	411.751	997.901	681.664	964.416	554.623
ENSDARG00000074069	11.3592	6.72153	1.30419	5.1538	2.55267e-07	4.98874e-06	FALSE	0	0	0	0	15.8815	0.947976	45.3963	21.6641
ENSDARG00000057738	917.968	-0.672565	0.130555	-5.15159	2.58285e-07	5.0438e-06	FALSE	1007.62	1044.38	1069.28	1026.91	608.118	724.458	471.231	797.138
ENSDARG00000060767	3996.93	0.364975	0.0708569	5.15087	2.5928e-07	5.05929e-06	FALSE	3526.48	3681.75	3520.76	3603.18	5044.47	4684.28	4731.87	4004.06
ENSDARG00000086471	675.078	0.541703	0.105193	5.14961	2.61025e-07	5.08938e-06	FALSE	542.881	569.482	558.463	562.003	930.915	722.445	899.049	701.959
ENSDARG00000017217	347.362	0.639905	0.124291	5.14842	2.62685e-07	5.11379e-06	FALSE	293.672	265.288	284.665	271.902	472.305	466.84	459.693	340.546
ENSDARG00000002847	165.813	-1.04994	0.203933	-5.14844	2.62664e-07	5.11379e-06	FALSE	283.06	193.667	183.731	206.741	94.7357	132.921	96.9159	90.8263
ENSDARG00000063905	365547	0.423954	0.0823668	5.14715	2.64473e-07	5.14461e-06	FALSE	297810	316839	324675	339508	458689	430829	465052	361122
ENSDARG00000021987	6938.8	-0.347047	0.0674479	-5.1454	2.66949e-07	5.18874e-06	FALSE	7889.66	8240.19	7907.12	7958	5999.6	6111.31	6506.07	6534.07
ENSDARG00000092636	210.989	0.881033	0.171263	5.14432	2.6849e-07	5.21464e-06	FALSE	171.285	133.997	133.657	165.898	265.572	328.772	272.076	245.929
ENSDARG00000032618	407.907	0.762705	0.148431	5.13846	2.77006e-07	5.37588e-06	FALSE	299.351	305.296	331.245	319.39	626.373	381.548	634.993	489.553
ENSDARG00000051873	141.625	-1.0174	0.198037	-5.13743	2.78526e-07	5.4012e-06	FALSE	209.551	187.548	158.484	188.885	78.4427	82.0324	82.0625	122.78
ENSDARG00000005578	1502.83	-0.778996	0.1517	-5.13511	2.81976e-07	5.46388e-06	FALSE	1806.33	2028.47	1933.59	2164.77	920.657	1658.68	965.088	1080.84
ENSDARG00000060257	1761.75	0.334416	0.0651421	5.13364	2.84198e-07	5.49844e-06	FALSE	1563.39	1593.54	1605.74	1586.79	1922.21	2125.28	2122.8	1840.83
ENSDARG00000075779	158.422	-0.9547	0.185966	-5.13375	2.84032e-07	5.49844e-06	FALSE	192.499	214.54	198.704	231.121	70.6868	117.157	137.673	106.426
ENSDARG00000059097	4733.49	0.393083	0.0765955	5.13193	2.8678e-07	5.54413e-06	FALSE	4075.45	3887.38	4179.35	4532.52	5755.87	5456.67	5841.54	4851.99
ENSDARG00000078359	1724.42	0.698354	0.136208	5.1271	2.94244e-07	5.67966e-06	FALSE	1340.71	1450.93	1468.5	1386.25	3129.86	1947.67	2266	1823.39
ENSDARG00000053520	149.779	0.844612	0.164733	5.12716	2.9415e-07	5.67966e-06	FALSE	109.437	109.39	106.348	112.909	234.724	164.975	213.714	174.529
ENSDARG00000079645	743.51	0.486518	0.0949204	5.12553	2.967e-07	5.72266e-06	FALSE	655.034	610.388	678.095	621.033	1046.82	801.107	895.704	849.995
ENSDARG00000070337	514.404	0.617577	0.12051	5.12469	2.9803e-07	5.74389e-06	FALSE	440.369	402.816	402.804	432.941	643.659	510.672	716.363	701.606
ENSDARG00000104768	505.275	0.659942	0.1288	5.12378	2.99469e-07	5.76719e-06	FALSE	458.476	373.595	366.607	319.043	605.015	620.005	685.196	479.836
ENSDARG00000037350	30974.1	0.343411	0.0670286	5.12335	3.00158e-07	5.7674e-06	FALSE	28640.1	28011.4	28302.2	28833.6	39498.2	32775.8	38526	33570.8
ENSDARG00000042894	497.998	-0.700957	0.136812	-5.12351	2.99906e-07	5.7674e-06	FALSE	548.019	634.878	582.408	570.275	344.624	381.283	264.045	445.344
ENSDARG00000091320	182.248	1.27763	0.249374	5.12334	3.0017e-07	5.7674e-06	FALSE	119.806	87.2731	106.555	79.8551	201.732	134.748	354.962	257.91
ENSDARG00000028088	126.834	-0.786811	0.15359	-5.12279	3.01045e-07	5.77979e-06	FALSE	150.607	148.945	165.063	185.514	89.4863	96.4557	93.2069	98.6729
ENSDARG00000102722	239.775	-2.18244	0.426115	-5.12173	3.02752e-07	5.80811e-06	FALSE	395.322	393.276	487.674	607.658	28.5325	166.792	109.712	110.122
ENSDARG00000030154	1319.48	0.638439	0.12469	5.12021	3.05198e-07	5.85057e-06	FALSE	1056.4	1002.8	1007.21	1130.81	2143.2	1498.28	1554.52	1341.48
ENSDARG00000030905	1013.2	0.495024	0.0967041	5.11896	3.07227e-07	5.88497e-06	FALSE	930.257	817.454	888.981	852.131	1347.82	1232.5	1317.03	1019.45
ENSDARG00000060830	676.89	-0.561765	0.109763	-5.11801	3.0878e-07	5.90568e-06	FALSE	878.598	836.96	874.041	780.653	599.29	477.743	634.287	570.01
ENSDARG00000075870	345.409	0.84371	0.164849	5.11806	3.0869e-07	5.90568e-06	FALSE	281.555	251.578	253.519	305.682	488.22	497.619	639.537	336.883
ENSDARG00000068257	112.166	1.44191	0.281828	5.11629	3.11608e-07	5.95524e-06	FALSE	85.8935	74.0678	48.0517	58.5935	256.948	112.76	212.068	138.137
ENSDARG00000038258	288.009	-1.00411	0.196312	-5.11488	3.13943e-07	5.99529e-06	FALSE	406.455	480.989	440.575	360.874	156.864	317.63	185.609	185.075
ENSDARG00000075282	2398.87	0.536232	0.104849	5.11433	3.14854e-07	6.00761e-06	FALSE	1905.73	2250.22	1906.16	2100.26	3132.46	2754.38	3460.99	2494.63
ENSDARG00000000002	431.893	0.843442	0.164922	5.1142	3.15068e-07	6.00761e-06	FALSE	326.453	361.596	330.131	315.803	775.279	506.769	688.517	425.225
ENSDARG00000104572	787.408	1.10071	0.215241	5.11383	3.157e-07	6.01509e-06	FALSE	628.577	558.313	697.547	468.524	1253.92	1509.99	1489.28	792.452
ENSDARG00000086512	216.085	0.986795	0.192998	5.11298	3.17111e-07	6.03738e-06	FALSE	151.595	141.624	182.81	176.878	299.35	437.368	302.567	258.689
ENSDARG00000099411	523.869	1.0403	0.203481	5.1125	3.17926e-07	6.04832e-06	FALSE	401.861	345.679	390.579	376.563	1080.76	763.004	853.351	419.599
ENSDARG00000055656	116.093	-1.22569	0.239858	-5.11005	3.22078e-07	6.12266e-06	FALSE	194.324	190.795	199.38	228.795	48.1622	125.306	102.283	72.5645
ENSDARG00000035602	24.7843	2.19186	0.429106	5.10798	3.25618e-07	6.18527e-06	FALSE	7.30534	7.50319	7.89612	4.5216	24.5724	21.0442	30.7755	45.6337
ENSDARG00000088741	2255	0.576255	0.112843	5.10668	3.27876e-07	6.22344e-06	FALSE	1885.02	1669.27	1721.71	2269.13	2631.47	3140.4	3076.73	2406.35
ENSDARG00000029263	2115.24	0.489613	0.0958915	5.1059	3.29215e-07	6.24414e-06	FALSE	1873.61	1753.97	1906.84	1670.25	2712.02	2150.72	2689.42	2558.38
ENSDARG00000016343	368.154	0.693482	0.135887	5.10337	3.33663e-07	6.32371e-06	FALSE	284.645	332.002	345.926	307.853	603.115	463.641	574.982	418.545
ENSDARG00000071241	138.507	1.06701	0.209137	5.10198	3.36116e-07	6.36539e-06	FALSE	65.6471	102.965	110.24	85.7934	215.051	198.642	221.881	134.86
ENSDARG00000021938	231.703	1.09144	0.213995	5.10029	3.39136e-07	6.41774e-06	FALSE	143.342	182.539	145.612	183.687	455.045	288.199	417.976	238.232
ENSDARG00000091013	50.0349	-1.6636	0.326224	-5.09957	3.40429e-07	6.43734e-06	FALSE	98.3341	88.8477	73.6638	73.6667	16.2415	19.1748	23.3751	44.2537
ENSDARG00000022968	3421.29	0.547323	0.107443	5.09409	3.50422e-07	6.62131e-06	FALSE	2980.26	2838.7	2974.6	2809.38	4838.04	3929.47	4826.97	3364.25
ENSDARG00000091085	35.1674	5.46101	1.07245	5.09207	3.5417e-07	6.68709e-06	FALSE	1.75969	2.54459	3.60417	1.09131	253.226	33.297	94.6113	16.7365
ENSDARG00000053864	2133.26	0.621878	0.12225	5.08693	3.63901e-07	6.86566e-06	FALSE	1719.17	1840.13	1811.34	1813.52	3191.66	2312.02	3303.54	2252.41
ENSDARG00000094854	24.6827	2.52096	0.495708	5.08557	3.66516e-07	6.9098e-06	FALSE	19.0972	7.4865	2.99028	6.36076	68.0459	32.1585	64.146	31.9965
ENSDARG00000007080	496.274	-1.33081	0.261803	-5.08324	3.71047e-07	6.98996e-06	FALSE	770.601	687.384	679.699	1229.59	206.269	382.536	422.869	327.269
ENSDARG00000009194	2701.17	-0.874768	0.172143	-5.08164	3.74196e-07	7.04398e-06	FALSE	4371.62	2677.69	2676.91	2618.38	1411.29	1748.46	1368.47	2193.76
ENSDARG00000009046	199.604	0.7203	0.141751	5.08145	3.74573e-07	7.04579e-06	FALSE	166.35	136.062	118.017	154.474	255.829	245.474	203.054	238.757
ENSDARG00000027738	2021.23	0.534966	0.105299	5.08046	3.7653e-07	7.07729e-06	FALSE	1702.61	1667.11	1594.48	1745.19	2394.77	2871.5	2397.2	2061.62
ENSDARG00000013845	1889.1	0.356443	0.0701631	5.0802	3.7703e-07	7.08139e-06	FALSE	1649.42	1525.92	1702.6	1818.55	2071.11	2171.59	2102.28	2232.43
ENSDARG00000012341	656.199	-1.00261	0.197538	-5.07554	3.86388e-07	7.25171e-06	FALSE	894.738	814.429	839.909	841.763	373.877	232.76	477.449	605.275
ENSDARG00000024317	1726.38	-0.3218	0.0634163	-5.0744	3.88717e-07	7.28997e-06	FALSE	1971.59	1962.1	1911.01	1906.89	1683.13	1518.24	1525.15	1476.41
ENSDARG00000040492	1381.79	-0.341553	0.0673263	-5.0731	3.9139e-07	7.33462e-06	FALSE	1635.27	1417.49	1624.38	1588.91	1263.84	1214.87	1213.59	1251.32
ENSDARG00000039515	5778.25	0.528676	0.104221	5.07263	3.92359e-07	7.34728e-06	FALSE	4939.79	4751.55	5026.6	5197.08	8523.9	6360.91	7941.43	5908.38
ENSDARG00000095362	158.346	-1.75341	0.345739	-5.07147	3.94746e-07	7.38646e-06	FALSE	212.832	199.081	347.612	332.418	30.2498	158.567	68.253	67.5353
ENSDARG00000092044	218.342	-1.28427	0.253276	-5.07062	3.96524e-07	7.41419e-06	FALSE	318.779	262.368	391.977	353.451	129.762	214.997	70.2399	130.44
ENSDARG00000020625	3080.91	0.790514	0.155908	5.07038	3.97026e-07	7.41805e-06	FALSE	2471.52	2672.33	2545.32	2511.71	5763.82	3772.88	5184.78	2926.22
ENSDARG00000043095	1233.83	0.453317	0.0894396	5.06841	4.01147e-07	7.48947e-06	FALSE	1180.28	1029.92	967.478	1112.27	1501.34	1318.01	1430.8	1611.99
ENSDARG00000039266	1314.26	-0.692847	0.136743	-5.0668	4.04561e-07	7.5476e-06	FALSE	1770.13	1291.6	1781.61	2247.18	1273.13	1028.57	1077.83	1009.69
ENSDARG00000022399	738.208	-0.523818	0.10339	-5.06645	4.05306e-07	7.5535e-06	FALSE	917.901	1014.5	918.88	978.329	633.496	799.78	667.381	566.981
ENSDARG00000062054	2704.69	-0.65718	0.129714	-5.06637	4.0548e-07	7.5535e-06	FALSE	3187.36	3498.49	3361.55	3320.79	1449.91	2363.65	2454.06	2208.59
ENSDARG00000010442	883.421	0.434198	0.0857503	5.06351	4.116e-07	7.66181e-06	FALSE	814.047	698.358	804.636	746.539	1038.8	1009.56	1129.54	958.569
ENSDARG00000014190	128.594	1.62852	0.321664	5.06281	4.13132e-07	7.68462e-06	FALSE	41.3798	97.4038	91.9357	73.4774	242.757	159.873	327.742	215.7
ENSDARG00000063522	391.607	-0.739673	0.146118	-5.06215	4.14552e-07	7.70533e-06	FALSE	494.63	489.191	467.831	451.815	282.216	314.05	205.568	337.279
ENSDARG00000052279	337.163	-0.581622	0.114951	-5.05973	4.19848e-07	7.79799e-06	FALSE	381.122	421.348	434.827	394.988	279.045	298.799	228.146	285.932
ENSDARG00000035809	45771.3	-0.4223	0.083511	-5.05682	4.26313e-07	7.9122e-06	FALSE	51763.9	53041.2	50031.9	49655.4	39837.9	35343.3	39802.1	37614.9
ENSDARG00000058094	2420.44	0.425312	0.0841437	5.05459	4.31314e-07	7.98938e-06	FALSE	1984.86	2149.23	2180.07	2205.12	3283.56	2744.69	2893.63	2528.96
ENSDARG00000004672	1522.37	0.48333	0.0956182	5.05479	4.30871e-07	7.98938e-06	FALSE	1476.64	1311.65	1470.91	1215.51	2153.97	1885.74	1958.32	1655.62
ENSDARG00000019492	629.816	-1.58005	0.312599	-5.05454	4.31428e-07	7.98938e-06	FALSE	912.195	996.636	1150	1213.27	154.365	577.115	352.949	344.69
ENSDARG00000029500	15780.9	0.272744	0.05398	5.05268	4.35651e-07	8.06163e-06	FALSE	15159.2	14524.6	14999	15357.5	18088	17511.6	19400.7	17535.5
ENSDARG00000070416	262.812	-0.807702	0.159888	-5.05166	4.37979e-07	8.09873e-06	FALSE	339.112	334.829	372.312	325.813	135.663	217.311	198.207	230.772
ENSDARG00000040295	14129.1	0.868679	0.172113	5.04714	4.48484e-07	8.28687e-06	FALSE	10844	11226.3	12419.7	10838.4	23618.1	14782.1	29325.8	15045.8
ENSDARG00000070478	154.91	0.700565	0.138836	5.04597	4.51223e-07	8.33134e-06	FALSE	128.056	118.321	124.954	108.068	195.706	208.901	177.972	193.768
ENSDARG00000079296	409.63	1.3642	0.270458	5.04403	4.55825e-07	8.41012e-06	FALSE	203.61	330.909	312.687	279.53	1308.87	542.986	574.434	479.477
ENSDARG00000076563	234.951	0.758716	0.150432	5.04357	4.56917e-07	8.42406e-06	FALSE	169.572	196.238	210.257	186.671	379.927	314.02	347.659	253.777
ENSDARG00000000068	928.983	-0.562851	0.111647	-5.04136	4.62244e-07	8.51602e-06	FALSE	1086.71	1314.32	1286	1183.78	749.082	989.421	852.718	710.567
ENSDARG00000070122	1081.13	0.371244	0.0736467	5.04088	4.63392e-07	8.5309e-06	FALSE	862.026	918.31	992.268	997.233	1133.89	1290.65	1247.67	1214.68
ENSDARG00000014031	1213.89	-0.864927	0.171617	-5.03987	4.65839e-07	8.56966e-06	FALSE	1584.08	1984.39	1982.87	1847.49	727.321	1204.86	1357.07	775.395
ENSDARG00000074869	723.311	0.729287	0.144775	5.03739	4.71932e-07	8.67538e-06	FALSE	738.272	486.159	616.392	552.509	1098.3	815.389	1176.01	857.682
ENSDARG00000062277	559.724	0.484396	0.0961831	5.03619	4.74889e-07	8.72334e-06	FALSE	505.377	476.323	398.757	499.968	690.361	632.748	660.881	642.97
ENSDARG00000102412	1666.52	-0.425861	0.0845691	-5.03565	4.76231e-07	8.7416e-06	FALSE	1799.51	2112.14	1986.46	1985.51	1417.63	1657.57	1346	1451.77
ENSDARG00000033832	17932.5	0.608769	0.120919	5.03453	4.79025e-07	8.78644e-06	FALSE	15550.1	15203.1	15506.4	16670.8	25682.3	25641.3	27452.9	17194.9
ENSDARG00000057249	3478.98	0.297232	0.0590424	5.03421	4.79825e-07	8.7947e-06	FALSE	3196.76	3140.3	3035.75	3198.58	3959.8	3615.83	3989.15	3878.89
ENSDARG00000078216	753.297	-0.431371	0.0857295	-5.03177	4.85981e-07	8.90101e-06	FALSE	843.36	885.699	922.347	829.233	575.059	660.777	675.399	669.031
ENSDARG00000086847	49.1417	1.40345	0.278948	5.03122	4.87365e-07	8.91985e-06	FALSE	31.0422	20.5077	33.1255	27.4324	70.1717	67.5319	97.9707	61.5655
ENSDARG00000036107	8272.08	0.563709	0.112075	5.02975	4.91127e-07	8.98215e-06	FALSE	7003.99	7465.45	7217.62	7099.59	10952.4	9576.53	13211.5	8810.98
ENSDARG00000071294	147.678	-0.824469	0.163951	-5.02874	4.93717e-07	9.02294e-06	FALSE	170.192	186.841	168.424	198.173	115.666	101.368	76.1479	115.707
ENSDARG00000008457	424.938	-0.58664	0.116787	-5.02315	5.08297e-07	9.28263e-06	FALSE	462.008	556.728	549.868	586.631	340.654	345.869	416.176	336.064
ENSDARG00000031761	781.858	-1.01022	0.201163	-5.02188	5.11671e-07	9.33743e-06	FALSE	1025.74	960.189	1223.53	1153.07	304.202	746.417	536.17	579.159
ENSDARG00000054609	804.865	0.796846	0.158715	5.02061	5.15081e-07	9.39282e-06	FALSE	633.114	652.498	687.362	658.411	1096.47	969.292	1605.6	902.473
ENSDARG00000063912	127780	0.409592	0.0816025	5.01935	5.18472e-07	9.4478e-06	FALSE	106720	111192	113831	119158	158063	149021	165033	126830
ENSDARG00000074487	60.9682	2.65019	0.528145	5.01792	5.22349e-07	9.51154e-06	FALSE	20.6146	11.7538	25.0389	31.8926	348.715	48.9126	111.916	54.1733
ENSDARG00000042881	176.814	0.879372	0.175312	5.01603	5.27504e-07	9.59844e-06	FALSE	128.661	101.801	116.61	130.3	189.778	162.385	261.531	261.659
ENSDARG00000044691	233.569	-0.964139	0.192228	-5.0156	5.28676e-07	9.61279e-06	FALSE	336.169	276.442	374.413	286.859	147.572	148.673	118.174	235.903
ENSDARG00000039429	2092.09	-0.396783	0.0791192	-5.015	5.30337e-07	9.63599e-06	FALSE	2268.48	2523.76	2289.62	2321.55	1715.67	1949.97	1624.52	1852.47
ENSDARG00000045801	1202.07	0.369547	0.0736981	5.01433	5.3218e-07	9.66248e-06	FALSE	1116.94	998.736	1129.01	999.306	1402.83	1441.8	1327.88	1307.25
ENSDARG00000098475	5808.33	-0.884148	0.176385	-5.01259	5.37023e-07	9.74269e-06	FALSE	7265.15	6264.6	7490.32	7293.79	2358.47	5538.71	3422.25	4020.75
ENSDARG00000025903	177.524	0.927225	0.184984	5.01246	5.37375e-07	9.74269e-06	FALSE	122.519	137.297	116.107	126.412	213.063	221.758	327.862	193.335
ENSDARG00000101357	13.6284	4.38003	0.873854	5.01231	5.37798e-07	9.74332e-06	FALSE	0	1.07194	1.98144	0.906324	17.7233	20.9867	16.2955	32.8862
ENSDARG00000100596	2960.94	-0.376341	0.0751192	-5.00992	5.44514e-07	9.85786e-06	FALSE	2986.78	3496.39	3006.58	3110.81	2414.03	2441.92	2195.31	2655.17
ENSDARG00000103490	2027.7	-0.581186	0.116122	-5.00498	5.58685e-07	1.01053e-05	FALSE	2265.57	2346.03	2134.29	2226.52	1305.48	1721.41	1197.34	1770.18
ENSDARG00000087633	131.327	-1.07887	0.215564	-5.00487	5.58985e-07	1.01053e-05	FALSE	171.742	215.786	252.888	191.06	78.4448	142.715	68.8828	104.38
ENSDARG00000025073	21914.6	0.351134	0.0702349	4.99942	5.7503e-07	1.03878e-05	FALSE	20469.4	20420.4	19210.8	20332.8	28240.4	24659.7	27023.4	22677.2
ENSDARG00000057586	884.702	0.504846	0.10099	4.99899	5.76325e-07	1.04037e-05	FALSE	724.038	718.519	744.498	794.132	1242.53	1029.26	920.278	1042.64
ENSDARG00000000943	647.382	0.377328	0.0754891	4.99844	5.77968e-07	1.04184e-05	FALSE	604.673	557.715	572.781	553.147	769.771	726.189	731.248	739.811
ENSDARG00000015337	550.826	-0.599221	0.119881	-4.99847	5.77876e-07	1.04184e-05	FALSE	640.676	642.7	626.567	721.791	335.034	502.271	425.922	473.008
ENSDARG00000030270	20941.7	0.553625	0.110809	4.99622	5.84637e-07	1.0531e-05	FALSE	20642.1	17752.9	18480.4	16118.8	31354.4	24953.1	28464.7	22360.8
ENSDARG00000017860	136.905	1.19282	0.238836	4.9943	5.90481e-07	1.06287e-05	FALSE	99.8995	73.7936	86.7279	119.952	266.277	174.012	280.068	151.044
ENSDARG00000052074	246.453	-0.870453	0.174308	-4.99376	5.92148e-07	1.0651e-05	FALSE	254.2	323.723	337.497	355.366	128.751	180.827	200.953	185.546
ENSDARG00000096908	185.693	-0.812795	0.162808	-4.99235	5.96497e-07	1.07216e-05	FALSE	262.512	269.702	279.234	238.626	139.892	139.524	178.087	140.124
ENSDARG00000105187	768.179	-0.486535	0.0974661	-4.99184	5.98059e-07	1.07419e-05	FALSE	1028.41	1040.58	1090.64	1113.23	799.832	738.556	871.815	644.335
ENSDARG00000079420	533.074	-1.04822	0.210103	-4.98908	6.06687e-07	1.08891e-05	FALSE	694.596	888.727	938.889	803.355	219.714	482.6	526.501	379.785
ENSDARG00000071331	23631.9	0.741661	0.148716	4.98709	6.12941e-07	1.09935e-05	FALSE	18070.2	19101.1	17384.5	20714.1	38391.8	33429.1	33476.1	20567.1
ENSDARG00000018637	4212.26	0.392807	0.0787741	4.9865	6.14824e-07	1.10194e-05	FALSE	3957.29	3815.33	4086.27	3701.24	5386.31	4555.59	5747.48	4739.77
ENSDARG00000004447	129.096	1.08866	0.218432	4.98398	6.22879e-07	1.11558e-05	FALSE	87.5499	91.1585	98.47	77.6817	193.475	170.73	261.709	129.586
ENSDARG00000103586	690.107	0.495115	0.0993605	4.98301	6.26017e-07	1.1204e-05	FALSE	565.751	561.821	603.401	677.403	833.962	846.388	906.341	815.067
ENSDARG00000021838	23433.3	0.354217	0.0710891	4.98272	6.26967e-07	1.1205e-05	FALSE	22245.3	21798.1	21155.7	21057.2	30826.9	25097.3	28774.4	25561.5
ENSDARG00000090912	1926.66	0.526057	0.105574	4.98285	6.26561e-07	1.1205e-05	FALSE	1618.38	1612.59	1703.14	1652.37	2569.78	2118.66	2847.86	1952.22
ENSDARG00000093108	84.9292	1.17796	0.236436	4.98214	6.28856e-07	1.12307e-05	FALSE	51.3867	58.2433	68.6303	67.4975	191.264	124.427	144.684	100.406
ENSDARG00000077353	3575.47	0.322644	0.064768	4.98153	6.30845e-07	1.12582e-05	FALSE	2972.91	3135.15	3130.3	3058.06	3878.95	4159.19	3758.35	3589.53
ENSDARG00000038900	5062.93	-0.458653	0.0920829	-4.98087	6.32995e-07	1.12886e-05	FALSE	5700.27	6013.35	5932.36	6068.77	3522.68	5042.81	4348.86	4342.95
ENSDARG00000100869	244.437	-0.648983	0.130309	-4.98033	6.34764e-07	1.13121e-05	FALSE	315.772	362.22	266.714	288.618	180.319	210.037	214.39	180.393
ENSDARG00000099428	43.2564	-3.15087	0.633003	-4.97766	6.43572e-07	1.14609e-05	FALSE	86.0533	124.714	9.09785	215.739	21.4976	12.9895	4.58302	10.122
ENSDARG00000044094	212.593	-0.962351	0.193384	-4.97637	6.47887e-07	1.15295e-05	FALSE	316.527	311.056	263.732	296.182	123.719	98.8659	190.192	194.072
ENSDARG00000056627	1498.2	0.513768	0.103268	4.97508	6.52223e-07	1.15985e-05	FALSE	1302.99	1305.67	1401.99	1348.98	2006.8	1575.21	2297.48	1775.61
ENSDARG00000002764	198.446	-1.27731	0.256775	-4.97444	6.54373e-07	1.16285e-05	FALSE	232.84	365.172	420.222	336.182	70.8677	183.741	172.751	132.116
ENSDARG00000076844	149.588	1.36873	0.275203	4.97353	6.57443e-07	1.16747e-05	FALSE	49.8208	88.0517	67.8905	65.7558	146.188	241.2	222.381	88.3206
ENSDARG00000099022	18457.3	0.481826	0.0969026	4.97227	6.61728e-07	1.17425e-05	FALSE	16534.9	16140.1	15699	16298.1	28038.2	20492.7	22275.6	19511.7
ENSDARG00000095005	18.4306	-3.93557	0.791658	-4.9713	6.65054e-07	1.17932e-05	FALSE	45.6225	26.6789	54.1	67.4252	0.987352	2.81358	9.01154	0
ENSDARG00000059600	704.236	-0.639355	0.128616	-4.97105	6.65897e-07	1.17998e-05	FALSE	891.891	904.536	867.532	813.849	412.167	627.969	587.963	602.23
ENSDARG00000099444	32.0016	2.37089	0.477208	4.96826	6.75566e-07	1.19627e-05	FALSE	4.32672	21.1371	1.94987	8.92584	39.7669	42.3833	64.2613	43.4959
ENSDARG00000054906	2457.81	0.323315	0.0650838	4.96767	6.77607e-07	1.19888e-05	FALSE	2356.83	2328.77	2140.77	2215.65	2661.67	2729.74	3098.47	2814.83
ENSDARG00000015254	1290.49	0.338518	0.0681458	4.96756	6.77996e-07	1.19888e-05	FALSE	1230.39	1075.35	1185.07	1161.19	1515	1542.58	1428.79	1393.26
ENSDARG00000036005	515.887	-0.4875	0.098152	-4.96678	6.80721e-07	1.20285e-05	FALSE	549.659	678.013	530.962	570.459	436.819	385.274	411.241	428.051
ENSDARG00000042562	134.036	-0.970347	0.195381	-4.96644	6.81941e-07	1.20415e-05	FALSE	148.141	160.559	173.322	213.614	76.5208	106.147	70.5106	102.769
ENSDARG00000045737	291.827	-1.21496	0.244648	-4.96614	6.82974e-07	1.20513e-05	FALSE	328.338	276.756	409.566	425.485	80.0126	213.565	131.777	194.451
ENSDARG00000094666	26.7195	2.07269	0.417964	4.959	7.08553e-07	1.24939e-05	FALSE	8.88508	8.56134	11.117	10.0982	52.513	40.2499	38.5743	32.6626
ENSDARG00000095461	5.17933	-6.56594	1.32423	-4.95832	7.1106e-07	1.25293e-05	FALSE	8.7303	13.7341	10.8808	28.8068	0	0	0	0
ENSDARG00000062727	2290.61	0.313648	0.0632763	4.95681	7.16616e-07	1.26183e-05	FALSE	2154.01	1922.27	2000.3	2081.94	2421.95	2556.09	2677.97	2478.21
ENSDARG00000052897	825.651	-0.389857	0.0786574	-4.9564	7.18127e-07	1.2636e-05	FALSE	961.812	988.846	932.73	883.914	635.307	754.461	735.112	745.858
ENSDARG00000068572	953.366	-0.428893	0.0865687	-4.95436	7.25673e-07	1.27509e-05	FALSE	1124.54	1150.94	1059.71	1051.01	756.024	781.448	913.849	804.071
ENSDARG00000053362	2049.41	0.621192	0.12538	4.95446	7.25301e-07	1.27509e-05	FALSE	1689.43	1769.37	1719.6	1675.08	2851.11	2534.27	3205.08	1954.32
ENSDARG00000075376	1038.73	0.692477	0.139792	4.95363	7.28415e-07	1.27812e-05	FALSE	675.563	765.952	741.65	950.414	1321.49	1507.06	1253.98	992.998
ENSDARG00000040466	5018.98	-0.816963	0.16492	-4.95368	7.28228e-07	1.27812e-05	FALSE	6742.91	7833.92	8379.77	7263.81	3039	4603.18	6083.34	3430.76
ENSDARG00000104660	353.793	-0.523087	0.105646	-4.95132	7.37113e-07	1.29157e-05	FALSE	445.956	431.11	458.692	424.058	284.554	335.27	326.88	278.775
ENSDARG00000036985	229.248	-0.880558	0.177841	-4.95137	7.36911e-07	1.29157e-05	FALSE	260.287	307.15	294.556	331.385	116.621	194.192	149.594	187.901
ENSDARG00000021172	462.688	-1.74938	0.353349	-4.95084	7.38938e-07	1.29369e-05	FALSE	829.487	510.764	1083.52	1019.69	158.925	463.108	224.237	178.7
ENSDARG00000040194	7.6679	6.56218	1.3255	4.95073	7.39356e-07	1.29369e-05	FALSE	0	0	0	0	54.9409	7.72874	4.53632	8.27122
ENSDARG00000032553	151.665	1.37932	0.27862	4.95052	7.40137e-07	1.29416e-05	FALSE	95.6036	78.4288	84.3432	120.511	235.703	134.078	336.406	278.354
ENSDARG00000018426	4897.05	-0.445352	0.0899842	-4.94923	7.45093e-07	1.30191e-05	FALSE	5807.18	5705.48	6074.62	6013.7	4349	5189.91	4055.41	3743.61
ENSDARG00000015010	100.27	1.16312	0.235099	4.94734	7.5234e-07	1.31366e-05	FALSE	71.5431	62.1867	64.0765	51.5148	189.619	99.6243	148.482	118.279
ENSDARG00000063670	225.669	0.869527	0.175805	4.94597	7.57652e-07	1.32202e-05	FALSE	173.958	174.68	153.132	158.33	376.571	300.986	330.325	198.89
ENSDARG00000041078	2398.97	0.611583	0.123681	4.94483	7.6209e-07	1.32883e-05	FALSE	1903.5	1728.99	2190.11	2239.44	3713.99	2824.77	3327.94	2459.28
ENSDARG00000007807	759.502	0.421783	0.0853351	4.94267	7.70592e-07	1.34273e-05	FALSE	661.078	662.262	630.788	596.861	779.77	824.628	881.742	923.228
ENSDARG00000091834	925.126	-0.56637	0.114613	-4.94159	7.74889e-07	1.34928e-05	FALSE	986.779	1302.94	1281.82	1312.83	759.449	798.429	987.772	757.864
ENSDARG00000005425	414.72	-0.559928	0.113328	-4.94078	7.781e-07	1.35393e-05	FALSE	562.597	458.474	457.787	528.336	326.089	355.855	308.31	365.405
ENSDARG00000100288	703.02	-0.475417	0.0962281	-4.94052	7.79128e-07	1.35478e-05	FALSE	774.63	817.195	786.321	820.558	522.269	545.518	622.09	610.085
ENSDARG00000103218	123.23	1.39081	0.281541	4.93999	7.81246e-07	1.35752e-05	FALSE	52.4307	95.5213	42.1983	85.6672	172.649	129.036	246.473	177.856
ENSDARG00000100635	1065.48	-1.57907	0.319685	-4.93944	7.83453e-07	1.36041e-05	FALSE	1992.75	1931.59	2641.9	1865.49	396.09	947.13	1067.21	412.229
ENSDARG00000032650	456.421	-0.600896	0.121662	-4.93906	7.85e-07	1.36215e-05	FALSE	647.848	529.207	609.974	618.393	370.714	479.943	356.164	379.121
ENSDARG00000028087	2247.49	-0.510252	0.10332	-4.93854	7.87092e-07	1.36484e-05	FALSE	2795.82	2594.65	2792.19	2522.84	1441.45	1984.75	1994.65	2090.87
ENSDARG00000044625	3477.36	0.368008	0.0745263	4.93796	7.89424e-07	1.36794e-05	FALSE	3134.52	2936.07	3000.69	3309.58	4408.09	3688.37	4177.51	3708.55
ENSDARG00000059280	783.129	0.397885	0.0805913	4.93707	7.93053e-07	1.37327e-05	FALSE	709.212	706.232	630.946	667.594	963.82	840.614	853.657	910.996
ENSDARG00000100661	289.294	0.695933	0.141033	4.93455	8.03366e-07	1.39017e-05	FALSE	177.577	243.691	198.024	217.21	311.832	315.274	417.818	314.619
ENSDARG00000058533	562.882	-0.680863	0.138001	-4.93374	8.06681e-07	1.39495e-05	FALSE	625.071	689.566	605.401	649.978	334.117	478.553	310.101	478.923
ENSDARG00000014180	380.211	0.617234	0.125124	4.93299	8.09816e-07	1.3994e-05	FALSE	312.243	328.922	312.109	286.051	526.399	436.446	550.574	388.507
ENSDARG00000037968	3612.52	0.508017	0.102987	4.93281	8.1055e-07	1.39971e-05	FALSE	3210.29	2979.6	3098.46	2931.71	5333.21	3858.67	4353.86	3832.1
ENSDARG00000043514	103.303	1.04684	0.212265	4.93177	8.1487e-07	1.4062e-05	FALSE	69.9114	78.4554	69.7716	100.956	205.095	158.77	181.19	119.202
ENSDARG00000019507	1842.65	-0.605504	0.122786	-4.93139	8.16466e-07	1.40798e-05	FALSE	2038.83	2197.49	2075.03	2105.01	1360.16	1463.64	1011.04	1694.93
ENSDARG00000061338	910.116	0.546832	0.110894	4.93113	8.17553e-07	1.40889e-05	FALSE	815.933	737.743	784.148	716.934	1324.17	1101.86	1113.26	922.781
ENSDARG00000042742	1280.88	0.393143	0.0797516	4.92959	8.24005e-07	1.41903e-05	FALSE	1114.36	1063.53	958.132	1132.8	1293.06	1374.55	1378.16	1553.13
ENSDARG00000104733	312.074	-0.608443	0.123438	-4.92913	8.25956e-07	1.42141e-05	FALSE	402.255	416.557	417.078	372.326	266.516	299.298	254.128	236.11
ENSDARG00000038538	116.935	0.949902	0.192746	4.92825	8.29679e-07	1.42684e-05	FALSE	77.3327	89.015	90.5859	98.4536	222.933	129.497	168.438	169.293
ENSDARG00000037978	132.368	1.56721	0.318048	4.92758	8.32541e-07	1.43078e-05	FALSE	49.4851	63.34	73.5143	68.4936	151.987	127.286	115.107	361.95
ENSDARG00000096359	2774.91	-0.63956	0.129841	-4.92573	8.40469e-07	1.44342e-05	FALSE	3239.08	3759.08	3253.49	3496.27	1745.99	1833.28	2735.55	2508.19
ENSDARG00000005791	22643.4	0.370099	0.0751743	4.92321	8.51343e-07	1.46109e-05	FALSE	21528.7	20375.8	21288.1	20311.5	30333.9	24500.6	28283	24806.7
ENSDARG00000097416	93.7826	-1.45231	0.295001	-4.92308	8.51928e-07	1.4611e-05	FALSE	108.229	135.362	167.047	181.221	27.812	38.9579	67.1735	81.6488
ENSDARG00000103705	65.1425	1.43123	0.290804	4.92163	8.58263e-07	1.47096e-05	FALSE	26.1966	42.9433	29.4029	34.2452	72.5592	89.6886	135.955	62.3308
ENSDARG00000097799	225.032	-0.745981	0.151628	-4.9198	8.66309e-07	1.48272e-05	FALSE	340.025	246.859	315.242	306	193.567	152.522	184.154	188.582
ENSDARG00000038052	54.8372	-1.07702	0.21891	-4.91992	8.65795e-07	1.48272e-05	FALSE	87.9561	75.5007	76.5105	89.7502	28.2481	45.3597	42.4536	39.764
ENSDARG00000027986	421.559	-0.564958	0.114839	-4.91957	8.67325e-07	1.48345e-05	FALSE	476.587	553.004	598.736	591.736	316.425	412.799	411.77	363.404
ENSDARG00000040352	958.503	-0.55589	0.113016	-4.91866	8.71364e-07	1.48934e-05	FALSE	1100.77	1244.05	1185.94	1080.98	602.22	830.491	878.131	824.939
ENSDARG00000012903	440.643	-1.04027	0.211542	-4.91754	8.76392e-07	1.49605e-05	FALSE	565.453	603.022	665.153	848.143	322.866	496.21	263.631	224.241
ENSDARG00000099557	95.9001	1.36337	0.277247	4.91752	8.76485e-07	1.49605e-05	FALSE	40.8883	59.0759	62.5776	65.7435	187.876	75.0905	138.593	189.711
ENSDARG00000005643	775.49	-0.487539	0.099154	-4.91699	8.78854e-07	1.49907e-05	FALSE	869.182	945.47	896.911	990.076	625.054	784.663	657.188	578.377
ENSDARG00000091938	67.8047	1.22563	0.249318	4.91591	8.83701e-07	1.50632e-05	FALSE	33.9823	44.9522	44.4413	50.5144	115.902	114.033	115.862	65.9636
ENSDARG00000041145	122.572	0.761283	0.154893	4.9149	8.88273e-07	1.51205e-05	FALSE	74.5145	98.6134	101.663	87.7191	140.554	160.701	170.171	147.374
ENSDARG00000077928	201.052	1.00811	0.205111	4.91493	8.88131e-07	1.51205e-05	FALSE	144.527	135.102	162.617	147.297	402.784	256.794	339.531	189.42
ENSDARG00000042620	3409.3	-0.322261	0.0655719	-4.91462	8.89554e-07	1.51321e-05	FALSE	3728.12	3746.19	3912.74	4402.91	3075.12	3172.15	3256.43	3132.34
ENSDARG00000045946	782.241	-0.447395	0.0910673	-4.9128	8.97861e-07	1.5263e-05	FALSE	966.405	891.058	998.797	885.001	617.75	648.978	768.589	705.134
ENSDARG00000037919	3751.39	0.343584	0.0699545	4.91154	9.03638e-07	1.53508e-05	FALSE	3500.67	3414.96	3280.98	3482.3	4800.77	4203.23	4392.79	3961.47
ENSDARG00000032188	355.409	-0.60466	0.123166	-4.90933	9.13901e-07	1.55147e-05	FALSE	403.447	470.083	431.838	428.357	245.249	259.005	279.089	354.192
ENSDARG00000070834	634.279	-0.406498	0.0828188	-4.90828	9.18773e-07	1.55868e-05	FALSE	810.695	729.681	761.107	720.43	572.586	566.366	555.538	580.9
ENSDARG00000098834	2197.4	0.596066	0.12145	4.9079	9.20585e-07	1.5607e-05	FALSE	1968.1	1906.37	1719.11	1679.15	3593.83	2494.63	2590.31	2312.51
ENSDARG00000076624	353.84	-1.3081	0.266573	-4.9071	9.24323e-07	1.56598e-05	FALSE	507.806	441.159	432.196	476.919	79.7095	321.536	149.346	199.424
ENSDARG00000030408	12873.8	0.405249	0.0825884	4.90685	9.2549e-07	1.56688e-05	FALSE	11985.3	11893.9	11177.3	11669.9	17350.1	14869.3	16561	13102.9
ENSDARG00000099152	52.7205	-1.18241	0.240978	-4.90672	9.26104e-07	1.56688e-05	FALSE	75.7204	76.2076	93.2004	66.7202	27.4641	35.6419	37.1542	36.778
ENSDARG00000020871	2302.93	0.395345	0.0805748	4.90655	9.26916e-07	1.56719e-05	FALSE	1922.38	2109.49	2025.82	2047.8	3070.65	2431.66	2634.48	2530.25
ENSDARG00000034897	25763.3	0.351352	0.071634	4.90483	9.35106e-07	1.57998e-05	FALSE	24724.9	21937	24448.9	24377.6	33610.3	28602.7	31397.5	28210.1
ENSDARG00000098237	1147.39	-0.59785	0.121969	-4.90166	9.50317e-07	1.6046e-05	FALSE	1403.2	1520.73	1187.97	1104	815.359	724.62	919.328	981.612
ENSDARG00000011640	5461.08	0.271365	0.0553678	4.90113	9.52849e-07	1.60779e-05	FALSE	5022.29	4778.34	4731.73	4907.72	6089.06	5964.63	5735.35	5671.88
ENSDARG00000003820	4404.51	0.541456	0.110515	4.89938	9.61373e-07	1.62108e-05	FALSE	2919.32	3950.94	3168.11	3638.36	5055.72	4535.75	5458.35	4863.31
ENSDARG00000002986	402.301	-1.23915	0.252936	-4.89904	9.63073e-07	1.62286e-05	FALSE	560.533	689.554	770.525	775.237	162.095	463.894	340.313	219.389
ENSDARG00000023532	1191.3	0.69991	0.142873	4.89884	9.64028e-07	1.62337e-05	FALSE	990.062	940.252	1066.9	1044.89	1918.95	1531.27	1990.83	1129.48
ENSDARG00000102888	1199.92	0.816839	0.166748	4.89863	9.65086e-07	1.62406e-05	FALSE	856.92	757.574	1060.4	899.736	1060.81	1779.55	2060.91	1397.8
ENSDARG00000056196	546.126	-0.854237	0.174437	-4.8971	9.72635e-07	1.63567e-05	FALSE	646.194	754.27	806.389	901.013	317.055	599.092	462.64	343.588
ENSDARG00000090943	154.571	-1.12287	0.229314	-4.89664	9.749e-07	1.63838e-05	FALSE	231.323	182.803	247.659	224.236	57.1734	149.674	92.4952	106.881
ENSDARG00000099380	29688.7	0.254543	0.0520057	4.89452	9.85451e-07	1.655e-05	FALSE	29509.9	27380.6	28143.6	28870.6	35960.1	32797.4	34966.5	32156.1
ENSDARG00000005943	178.041	-1.52522	0.311845	-4.89096	1.00344e-06	1.68408e-05	FALSE	198.028	212.341	212.172	233.467	28.4259	85.3004	69.6226	112.967
ENSDARG00000098012	86.2607	1.16425	0.238278	4.88612	1.02845e-06	1.7249e-05	FALSE	45.1785	48.2844	67.7939	42.4076	101.08	101.932	125.926	128.243
ENSDARG00000074060	476.192	0.699997	0.143276	4.88566	1.03086e-06	1.72778e-05	FALSE	379.353	400.3	405.191	396.292	776.791	586.951	735.369	473.555
ENSDARG00000039423	382.392	-1.05654	0.216268	-4.88534	1.0325e-06	1.72939e-05	FALSE	527.667	508.557	689.962	661.488	188.443	446.981	290.79	223.447
ENSDARG00000017676	3407.76	0.691897	0.14167	4.88385	1.04032e-06	1.74133e-05	FALSE	2800.86	2676.67	2966.01	2620.67	5531.87	3494.08	5405.96	3442.83
ENSDARG00000037925	1072.32	-0.699801	0.143315	-4.88296	1.04504e-06	1.74805e-05	FALSE	1091.77	1082.08	1221.27	1229.33	509.909	946.794	684.371	706.553
ENSDARG00000097285	61.5538	-1.07643	0.220479	-4.88224	1.04887e-06	1.75329e-05	FALSE	86.3701	115.672	74.2854	94.2109	47.2352	34.2975	46.1326	47.7868
ENSDARG00000055739	8.82287	-4.42217	0.906306	-4.87934	1.06444e-06	1.77813e-05	FALSE	27.7708	25.6983	24.7049	18.9958	0	2.8618	1.80855	0
ENSDARG00000071579	62.8399	-1.62813	0.333697	-4.87908	1.0658e-06	1.77922e-05	FALSE	84.0595	104.696	102.564	124.364	13.8517	55.228	25.2376	39.9814
ENSDARG00000025375	3501.81	-0.512243	0.105023	-4.87746	1.07461e-06	1.79154e-05	FALSE	4125.6	4175.84	4668.61	4307.37	2471.44	3648.46	2832.44	3162.02
ENSDARG00000009280	9184.36	0.539292	0.110565	4.87759	1.07392e-06	1.79154e-05	FALSE	8212.89	8015.62	7152.42	7680.56	11651.6	13254.2	11673.9	8560.99
ENSDARG00000008884	1732.26	-0.362158	0.0742549	-4.87723	1.07586e-06	1.79243e-05	FALSE	1834.32	1971.35	1854.25	2011.7	1442.27	1559.83	1369.43	1600.56
ENSDARG00000053973	5764.61	-2.39627	0.491504	-4.87539	1.08593e-06	1.80801e-05	FALSE	9333.36	9416.96	13944.7	15116.1	719.552	4733.34	2181.32	1448.08
ENSDARG00000101627	1802.99	-0.411585	0.0844563	-4.87335	1.09721e-06	1.82557e-05	FALSE	2167.27	2282.46	2238.97	1813.92	1646.64	1539.29	1667.98	1536.37
ENSDARG00000076544	1301.29	-0.449857	0.092322	-4.8727	1.10084e-06	1.83041e-05	FALSE	1438.03	1644.58	1431.42	1347.65	930.006	1118.58	1062.45	1177.11
ENSDARG00000076406	125.893	-0.989875	0.203166	-4.87226	1.1033e-06	1.83328e-05	FALSE	179.917	178.412	190.048	165.52	66.2915	65.5219	110.863	114.76
ENSDARG00000067664	14.6146	-2.35308	0.48297	-4.87211	1.10411e-06	1.83341e-05	FALSE	25.0636	25.6389	30.1407	31.0641	1.97835	7.49561	7.2136	5.18489
ENSDARG00000103788	17.4995	3.72115	0.764083	4.87009	1.11545e-06	1.85102e-05	FALSE	1.44479	0.927579	5.16647	4.46868	94.9638	41.0698	15.0301	13.557
ENSDARG00000075501	728.939	0.58215	0.11959	4.86787	1.1281e-06	1.87077e-05	FALSE	599.953	632.646	578.428	593.659	1108.09	928.66	849.307	717.315
ENSDARG00000079274	2656.78	-3.4261	0.703899	-4.86731	1.13128e-06	1.8748e-05	FALSE	4150.11	6515.15	7595.86	6378.89	103.773	1639.2	295.95	253.642
ENSDARG00000013856	483.685	-2.71894	0.559116	-4.86293	1.15658e-06	1.91546e-05	FALSE	705.598	948.661	1422.34	1200.68	53.8567	338.369	116.703	138.212
ENSDARG00000074947	67.9891	1.28895	0.265118	4.86179	1.1633e-06	1.92416e-05	FALSE	36.5095	40.7394	28.5992	26.2144	94.3307	46.9171	81.4778	96.5488
ENSDARG00000104569	76.2818	-1.84923	0.38036	-4.86178	1.16337e-06	1.92416e-05	FALSE	171.283	153.156	158.487	116.862	14.7613	60.9685	66.9366	23.8925
ENSDARG00000036162	16336.8	-0.45306	0.0932001	-4.86116	1.16703e-06	1.92894e-05	FALSE	19978.6	18389.5	18237.9	16318	14003.4	13839.5	10877.5	14544.4
ENSDARG00000077407	250.981	0.93061	0.191514	4.85923	1.17844e-06	1.94652e-05	FALSE	185.707	211.662	177.585	187.355	468.34	260.622	435.89	289.441
ENSDARG00000056023	921.346	0.397664	0.081848	4.85856	1.18242e-06	1.9518e-05	FALSE	827.816	738.189	854.86	837.35	1173.73	1032.66	1007.38	1079.87
ENSDARG00000061021	269.2	-0.684932	0.14099	-4.85802	1.18566e-06	1.95587e-05	FALSE	300.875	353.972	329.011	310.179	170.011	208.858	220.693	205.524
ENSDARG00000001818	355.886	-0.911475	0.187641	-4.85755	1.18844e-06	1.95918e-05	FALSE	472.521	555.137	525.438	480.798	241.046	368.983	308.201	165.551
ENSDARG00000100419	1453.55	0.370169	0.0762118	4.85711	1.19112e-06	1.9623e-05	FALSE	1261.84	1272.77	1278.42	1213.59	1749.03	1705.19	1581.3	1464.5
ENSDARG00000030106	3869.12	0.531313	0.109416	4.8559	1.19843e-06	1.97305e-05	FALSE	3150.19	3019.6	3369	3525.29	4898.92	4419.98	5714.94	3853.5
ENSDARG00000094890	331.334	0.919143	0.1893	4.85547	1.201e-06	1.97597e-05	FALSE	262.614	222.044	218.985	262.299	475.484	477.438	503.458	368.152
ENSDARG00000102977	1207.77	-0.529304	0.109023	-4.85498	1.20401e-06	1.97963e-05	FALSE	1415.22	1520.94	1604.15	1579.57	882.724	959.684	1245.31	1152.83
ENSDARG00000098645	501.658	-0.525893	0.108335	-4.85434	1.20791e-06	1.98214e-05	FALSE	601.104	618.224	705.022	639.021	391.435	479.185	443.377	467.096
ENSDARG00000012944	202077	-0.600758	0.123756	-4.85438	1.20764e-06	1.98214e-05	FALSE	242634	255292	220961	258738	178144	191922	150834	123758
ENSDARG00000080020	251.768	1.14393	0.23565	4.85438	1.20765e-06	1.98214e-05	FALSE	208.613	173.754	157.487	189.649	613.73	310.916	445.574	241.25
ENSDARG00000028546	8096.41	-0.342425	0.0705482	-4.85378	1.21132e-06	1.98645e-05	FALSE	9308.25	9236.75	9051.62	8822.93	7017.43	8098.98	6994.43	6615.11
ENSDARG00000010785	6182.56	0.64283	0.132443	4.85364	1.21214e-06	1.98648e-05	FALSE	5110.17	5328.7	5097.47	4925.34	9437.27	6702.76	9766.53	6043.95
ENSDARG00000078139	1201.94	0.410518	0.0845849	4.85332	1.2141e-06	1.98737e-05	FALSE	969.54	935.959	948.683	885.366	1200.28	1238.08	1107.65	1416.86
ENSDARG00000074642	202.02	1.54488	0.318315	4.8533	1.21427e-06	1.98737e-05	FALSE	130.977	104.139	151.903	113.545	647.132	169.749	406.059	238.069
ENSDARG00000001882	860.998	0.414407	0.0853989	4.8526	1.21851e-06	1.99301e-05	FALSE	740.546	725.259	687.118	756.301	916.746	952.428	1071.63	935.7
ENSDARG00000016687	6303.23	-0.460703	0.0949788	-4.85058	1.231e-06	2.01213e-05	FALSE	7432.07	7511.03	7571.86	7697.18	4674.63	6305.17	5780.92	5194.07
ENSDARG00000087624	331.988	0.832862	0.171721	4.85009	1.23408e-06	2.01585e-05	FALSE	286.426	229.034	250.5	295.387	532.095	461.063	581.147	317.397
ENSDARG00000102418	522.345	0.459138	0.0946919	4.84876	1.24238e-06	2.0281e-05	FALSE	454.891	462.379	469.018	466.658	684.187	582.232	709.254	574.981
ENSDARG00000033508	268.418	-0.641281	0.132281	-4.84788	1.24787e-06	2.03572e-05	FALSE	370.368	306.809	312.739	352.058	226.769	239.18	184.78	209.13
ENSDARG00000030139	2138.47	-0.272866	0.0562906	-4.84745	1.25061e-06	2.03887e-05	FALSE	2416.25	2320.7	2393.16	2338.06	2024.12	1992.88	1920.96	1898.92
ENSDARG00000097877	1926.08	-0.722456	0.149096	-4.84558	1.2624e-06	2.05676e-05	FALSE	2269.64	2356.82	2117.75	2381.16	1056.8	1751.56	1056.03	1664.68
ENSDARG00000035692	40374.7	0.35869	0.074027	4.8454	1.26357e-06	2.05731e-05	FALSE	38203.3	35402.1	38314.4	36416.3	51043.9	44817.6	51868	42477.1
ENSDARG00000098735	50.9076	-1.53767	0.31736	-4.8452	1.26486e-06	2.05808e-05	FALSE	48.3217	63.1843	113.96	81.5482	21.653	35.2305	23.5164	26.1265
ENSDARG00000092299	5.47644	-6.64336	1.37141	-4.84418	1.27137e-06	2.06734e-05	FALSE	11.7577	4.19669	23.7654	25.9974	0	0	0	0
ENSDARG00000103315	415.705	0.641485	0.13244	4.84358	1.27523e-06	2.07227e-05	FALSE	303.899	343.67	342.484	315.165	579.172	441.555	439.721	576.503
ENSDARG00000058105	28077.2	0.340749	0.0703689	4.84233	1.28324e-06	2.08393e-05	FALSE	25809.3	25274.9	25460.8	25857.2	28748.2	32893.9	36815.9	31224.4
ENSDARG00000031560	784.835	-0.466937	0.0964557	-4.84095	1.29219e-06	2.09712e-05	FALSE	905.423	893.64	843.667	894.516	642.966	624.485	538.052	749.637
ENSDARG00000089390	262.766	0.800003	0.165357	4.83803	1.31134e-06	2.12682e-05	FALSE	198.26	219.937	180.878	213.897	348.446	407.482	404.918	257.163
ENSDARG00000002768	298645	0.649992	0.13442	4.83552	1.328e-06	2.15244e-05	FALSE	257057	254859	235689	242711	498898	387880	400570	266619
ENSDARG00000040623	1364.83	1.0045	0.207769	4.83468	1.33357e-06	2.16008e-05	FALSE	1078.63	912.952	1037.11	1038.93	3243.2	1439.01	2175.38	1304.16
ENSDARG00000035452	220.344	-0.923941	0.191181	-4.8328	1.34624e-06	2.17919e-05	FALSE	286.379	294.482	325.658	326.955	118.322	197.741	139.96	192.488
ENSDARG00000010641	5530.4	0.677247	0.140163	4.83184	1.35275e-06	2.18832e-05	FALSE	4942.81	4409.14	4340.77	4513.65	9266.44	6583.78	8215.61	5047.82
ENSDARG00000067537	145.967	-0.913986	0.189222	-4.83023	1.36375e-06	2.2034e-05	FALSE	156.423	189.169	191.886	159.475	93.983	77.5156	72.9513	124.572
ENSDARG00000095577	128.824	1.16696	0.241596	4.83022	1.36384e-06	2.2034e-05	FALSE	80.1044	78.9204	81.8904	92.9228	181.302	153.494	283.667	133.031
ENSDARG00000076170	3773.25	0.411981	0.0853066	4.82942	1.36935e-06	2.21088e-05	FALSE	2839.7	3020.94	3019.24	3532.07	4068.47	4441.07	3857.37	4157.73
ENSDARG00000079011	819.305	-0.698672	0.14472	-4.82775	1.38086e-06	2.22804e-05	FALSE	878.905	964.043	857.594	955.122	561.65	413.966	528.105	745.555
ENSDARG00000054578	6694.6	0.284816	0.0590046	4.82701	1.38601e-06	2.23416e-05	FALSE	6346.13	5748.08	6067.46	6154.99	7812	7588.73	7231.31	6990.74
ENSDARG00000040041	2216.81	-0.471366	0.0976531	-4.82694	1.38644e-06	2.23416e-05	FALSE	2439.51	2651.88	2373.02	2443.13	1816.07	1922.01	1431.96	1974.86
ENSDARG00000104866	28.1095	3.2165	0.666503	4.82593	1.3935e-06	2.24411e-05	FALSE	0	4.29194	7.91883	0	34.4661	43.9851	15.4044	23.952
ENSDARG00000105117	1160.58	0.560903	0.116258	4.82466	1.40242e-06	2.25702e-05	FALSE	1000.33	986.92	972.711	1051.7	1477.47	1434.96	1847.77	1161.04
ENSDARG00000053119	50.4247	1.49702	0.310373	4.82329	1.4121e-06	2.27113e-05	FALSE	30.7402	33.0119	24.9124	28.2048	115.699	58.9707	90.9898	64.9026
ENSDARG00000101579	1844.23	0.240266	0.0498316	4.82156	1.42441e-06	2.28946e-05	FALSE	1692.23	1692.11	1706.67	1654.26	1954.91	2038.68	1967.87	2004.02
ENSDARG00000019360	1540.11	-0.37769	0.0783385	-4.82126	1.42658e-06	2.29148e-05	FALSE	1650.81	1914.82	1690.31	1678.14	1328.08	1365.41	1312.5	1332.42
ENSDARG00000017441	178607	0.570377	0.118341	4.81976	1.43732e-06	2.30726e-05	FALSE	153755	151356	147377	154334	271643	236879	231517	161043
ENSDARG00000071377	596.282	-0.511462	0.106137	-4.81889	1.44361e-06	2.31587e-05	FALSE	778.02	800.391	828.524	755.738	554.674	461.112	606.264	594.932
ENSDARG00000060029	468.76	0.568498	0.118043	4.81603	1.46442e-06	2.34775e-05	FALSE	335.739	413.46	442.646	379.986	636.297	543.163	658.49	501.211
ENSDARG00000088975	218.421	-0.659343	0.136929	-4.81522	1.47041e-06	2.35586e-05	FALSE	259.744	246.648	294.991	273.935	192.372	134.44	186.206	169.594
ENSDARG00000010556	83.2979	1.14134	0.237069	4.81436	1.47671e-06	2.36443e-05	FALSE	49.4751	48.3141	53.891	51.3609	151.968	104.187	103.331	90.13
ENSDARG00000045947	5960.29	-0.491808	0.102211	-4.81168	1.49669e-06	2.3949e-05	FALSE	7095.31	6676.37	6909.67	6921.27	4180.42	5092.42	5938.77	4417.51
ENSDARG00000052646	12.9436	3.45288	0.717636	4.81147	1.49826e-06	2.39588e-05	FALSE	0	2.79818	2.60349	4.73255	40.3653	28.9451	43.8842	11.2857
ENSDARG00000089877	1916.09	0.388841	0.0808222	4.81107	1.50123e-06	2.39781e-05	FALSE	1767.32	1521.32	1719.96	1742.55	2510.58	2034.95	2117.39	2175.95
ENSDARG00000104773	1180.84	1.39519	0.289996	4.81105	1.50138e-06	2.39781e-05	FALSE	738.993	816.256	674.055	696.386	3112.87	1300.51	2148.61	1133.86
ENSDARG00000094324	943.066	0.972748	0.202304	4.80836	1.52175e-06	2.42879e-05	FALSE	751.991	797.856	665.777	643.119	1838.82	805.276	1843.91	1121.09
ENSDARG00000033616	682.667	1.00247	0.208505	4.8079	1.52522e-06	2.43279e-05	FALSE	557.033	431.672	419.095	393.546	1201.6	645.818	1005.91	751.069
ENSDARG00000099269	368.748	0.704917	0.146698	4.80523	1.54571e-06	2.4639e-05	FALSE	289.259	268.497	293.79	326.079	588.574	474.331	508.735	352.871
ENSDARG00000052155	872.659	0.560698	0.116723	4.80368	1.55774e-06	2.48149e-05	FALSE	726.822	693.864	756.986	735.497	966.094	1163.05	1302.97	867.631
ENSDARG00000069796	799.806	0.41618	0.0866602	4.80244	1.56746e-06	2.4954e-05	FALSE	671.589	653.128	739.958	718.558	944.261	969.266	963.297	843.774
ENSDARG00000014673	317.179	-1.04722	0.218105	-4.80145	1.57523e-06	2.50617e-05	FALSE	463.779	402.967	373.855	419.804	106.009	225.461	177.372	291.911
ENSDARG00000043175	13.6979	-2.38903	0.497691	-4.80023	1.58481e-06	2.51982e-05	FALSE	19.5508	27.6186	42.3614	38.7103	3.66603	5.92091	8.84819	6.07256
ENSDARG00000087994	144.999	0.690408	0.143848	4.79958	1.58998e-06	2.52643e-05	FALSE	116.993	111.434	97.8774	104.082	177.022	146.072	188.214	179.38
ENSDARG00000062688	2998.23	-0.624816	0.130216	-4.7983	1.60015e-06	2.54034e-05	FALSE	3250.4	3424.48	3114.96	3238.89	1615.16	2269.58	1839.79	2720.94
ENSDARG00000076139	9.99848	-3.24547	0.67639	-4.79823	1.60076e-06	2.54034e-05	FALSE	44.8953	13.7991	22.1429	27.0643	1.91482	3.78258	1.75214	4.63051
ENSDARG00000103095	1441.26	0.402386	0.0838866	4.79678	1.61238e-06	2.55717e-05	FALSE	1331.22	1220.53	1232.62	1256.41	1699.6	1537.05	1885.15	1539.51
ENSDARG00000026513	252.328	0.835331	0.174252	4.79381	1.63641e-06	2.59364e-05	FALSE	159.796	214.081	219.467	155.103	437.312	263.111	346.274	292.279
ENSDARG00000017490	485.54	-1.62845	0.339715	-4.79357	1.63841e-06	2.59517e-05	FALSE	684.916	1054.36	924.051	635.025	161.39	457.539	285.721	162.908
ENSDARG00000100231	184.951	1.1468	0.239277	4.79277	1.6449e-06	2.6038e-05	FALSE	141.29	133.079	143.312	136.182	447.356	245.485	366.974	168.078
ENSDARG00000028106	2102.42	-0.352305	0.0735156	-4.79224	1.64928e-06	2.60908e-05	FALSE	2454.89	2518.85	2648.94	2412.68	1990.37	1751.34	2127.4	1991.83
ENSDARG00000090861	165.672	-0.653479	0.136391	-4.79123	1.65761e-06	2.62061e-05	FALSE	165.537	193.802	216.197	199.416	123.061	135.088	108.521	128.339
ENSDARG00000098535	48.9075	1.34136	0.279987	4.7908	1.66119e-06	2.62461e-05	FALSE	23.5502	21.3735	30.0188	22.7659	77.0277	50.8487	64.9981	55.6879
ENSDARG00000024189	100.841	1.27135	0.265491	4.78869	1.67874e-06	2.65068e-05	FALSE	70.3228	71.7363	70.4243	50.7646	213.646	142.672	189.906	88.7844
ENSDARG00000043457	49243	0.500734	0.104572	4.78842	1.68101e-06	2.6526e-05	FALSE	42550.7	41311.1	48852.3	46430.5	69720.3	57387.1	74035.5	52342.1
ENSDARG00000042510	202.878	-0.676089	0.141237	-4.78689	1.69384e-06	2.66954e-05	FALSE	279.462	213.181	287.961	229.082	136.742	163.087	170.992	159.121
ENSDARG00000058179	1232.41	0.700296	0.146298	4.78678	1.69478e-06	2.66954e-05	FALSE	974.988	976.896	1105.38	876.389	1638.43	1174.3	2137.84	1440.79
ENSDARG00000022631	803.786	-1.08786	0.227264	-4.78676	1.69495e-06	2.66954e-05	FALSE	1041.1	1294.83	1068.03	1345.03	298.428	513.899	881.318	540.446
ENSDARG00000053617	630.815	-0.644101	0.134634	-4.78408	1.71769e-06	2.70367e-05	FALSE	710.756	766.741	810.7	811.286	377.176	627.026	457.28	522.736
ENSDARG00000100793	242.416	0.99259	0.207492	4.78375	1.72053e-06	2.70474e-05	FALSE	116.629	150.768	144.725	180.248	237.505	269.19	437.543	239.447
ENSDARG00000056587	86.8937	-1.55714	0.325501	-4.78382	1.71992e-06	2.70474e-05	FALSE	172.163	101.344	108.188	107.021	20.0033	55.157	41.3452	47.9021
ENSDARG00000093381	577.442	2.0165	0.421564	4.78338	1.72374e-06	2.70809e-05	FALSE	263.18	331.567	299.989	230.697	2336.07	977.295	750.388	490.74
ENSDARG00000045814	1439.71	-0.388107	0.0811796	-4.78085	1.74559e-06	2.7407e-05	FALSE	1708.39	1739.03	1578.45	1640.44	1393.22	1354.31	1106.34	1240.35
ENSDARG00000010571	928.16	-0.509489	0.106587	-4.78002	1.75281e-06	2.75032e-05	FALSE	1061.75	1119.5	1045.72	953.347	717.269	784.175	598.741	833.255
ENSDARG00000077906	966.346	0.422318	0.0883794	4.77847	1.76633e-06	2.76931e-05	FALSE	766.304	775.434	846.569	778.128	970.377	976.363	1093.63	1203.97
ENSDARG00000013335	3185.51	0.557203	0.116609	4.77838	1.76713e-06	2.76931e-05	FALSE	2861.29	2693.91	2708.46	2640.55	4782.93	4012.08	4292.68	2958.31
ENSDARG00000053232	1106.87	-0.979202	0.204941	-4.77797	1.77072e-06	2.7732e-05	FALSE	1296.57	1452.13	1538.09	1378.42	461.44	503.251	836.593	1069.83
ENSDARG00000100270	1482.53	0.321696	0.0673338	4.77763	1.77371e-06	2.77616e-05	FALSE	1322.16	1305.69	1287.68	1371.78	1780.47	1607	1542.7	1679.5
ENSDARG00000033376	299.324	-0.57948	0.121313	-4.77675	1.78154e-06	2.78668e-05	FALSE	405.169	343.715	347.343	338.285	266.699	246.756	233.328	212.258
ENSDARG00000077777	57280.9	0.583851	0.122263	4.77537	1.7938e-06	2.80409e-05	FALSE	51531.1	47844.8	48489.4	48028.9	88436.2	57859.1	86167.8	61151.9
ENSDARG00000032098	177.684	-0.769345	0.161125	-4.77482	1.79868e-06	2.80858e-05	FALSE	210.786	231.351	268.381	264.497	112.178	183.902	142.02	135.904
ENSDARG00000104329	280.835	-0.959435	0.200943	-4.77467	1.80003e-06	2.80858e-05	FALSE	373.55	370.054	429.905	476.27	115.241	251.05	255.398	227.792
ENSDARG00000087805	78.6773	-1.18606	0.248406	-4.77467	1.8e-06	2.80858e-05	FALSE	123.653	112.208	155.141	122.045	36.5424	80.9553	63.1881	45.2856
ENSDARG00000053005	11.5405	4.05736	0.850179	4.77236	1.82077e-06	2.83919e-05	FALSE	1.46016	3.21647	0.985909	0.903822	38.3183	21.0715	39.8357	8.98262
ENSDARG00000029476	1024.9	0.800564	0.167758	4.77213	1.82286e-06	2.84066e-05	FALSE	830.273	913.424	815.379	773.472	1710.26	1185.96	1920.39	989.099
ENSDARG00000079839	457.017	0.625228	0.131031	4.77161	1.82756e-06	2.8427e-05	FALSE	362.243	364.002	399.596	391.879	691.104	533.752	669.896	451.51
ENSDARG00000086775	190.267	-1.18511	0.248364	-4.77166	1.82718e-06	2.8427e-05	FALSE	288.5	270.404	370.34	201.445	125.003	159.299	75.1832	139.365
ENSDARG00000090524	50.314	1.4261	0.298863	4.77174	1.82638e-06	2.8427e-05	FALSE	36.498	24.6612	29.5685	34.3402	79.576	68.0268	113.176	74.1186
ENSDARG00000020656	731.139	0.794046	0.166425	4.7712	1.83135e-06	2.84683e-05	FALSE	554.992	661.445	579.751	486.265	1144.4	699.243	1267.58	845.876
ENSDARG00000090428	3441.29	-1.85574	0.388958	-4.77106	1.83258e-06	2.84697e-05	FALSE	5184.82	7772.03	7769.89	6117.06	808.428	3059.43	2468.95	1080.4
ENSDARG00000042850	33.8997	1.95119	0.409011	4.77051	1.83763e-06	2.85306e-05	FALSE	14.5814	11.6524	13.4438	17.2276	48.115	23.3388	62.9598	86.7684
ENSDARG00000042428	1114.89	-0.586878	0.123086	-4.76803	1.86034e-06	2.88653e-05	FALSE	1481.02	1443.5	1482.99	1467.71	790.324	831.599	1222.27	1064.78
ENSDARG00000037738	55.956	1.7983	0.377213	4.76733	1.86685e-06	2.89483e-05	FALSE	21.8116	30.0708	35.2288	18.9104	93.1004	48.3071	143.248	84.9321
ENSDARG00000040503	618.02	0.749062	0.157192	4.76526	1.88609e-06	2.92285e-05	FALSE	505.826	499.965	508.178	482.825	1188.6	716.059	815.286	638.069
ENSDARG00000090793	403.055	-0.691115	0.145073	-4.76392	1.8987e-06	2.94058e-05	FALSE	487.577	464.21	501.277	457.074	217.964	373.557	258.886	331.498
ENSDARG00000045863	11.8259	3.20954	0.673782	4.76347	1.90291e-06	2.94528e-05	FALSE	1.46061	2.14404	4.93227	2.7122	18.6714	15.3149	46.1683	26.9397
ENSDARG00000057698	4970.44	0.628583	0.132005	4.76181	1.91869e-06	2.96787e-05	FALSE	4380.17	3887.44	4128.71	4412.67	7991.03	5681.15	7547.58	4770.01
ENSDARG00000094197	41.7768	2.24095	0.470722	4.76067	1.92954e-06	2.98098e-05	FALSE	19.4938	16.4878	0	12.0645	36.9828	47.5916	58.5794	55.4542
ENSDARG00000105151	31.4711	2.50896	0.527013	4.76072	1.92908e-06	2.98098e-05	FALSE	10.2348	5.35786	8.89461	17.193	42.2831	35.3398	116.737	44.854
ENSDARG00000012395	212.296	3.02968	0.636416	4.76054	1.93076e-06	2.98103e-05	FALSE	60.0817	80.2042	53.2716	66.8318	1287.02	396.701	362.984	80.721
ENSDARG00000013681	1731.17	0.576141	0.121029	4.76034	1.93265e-06	2.98211e-05	FALSE	1524.26	1515.61	1537.06	1476.36	2837.63	1853.58	2459.83	1875.57
ENSDARG00000092823	19.9146	-2.18184	0.458384	-4.75986	1.93727e-06	2.9874e-05	FALSE	29.3859	38.499	30.9101	19.0855	4.93143	1.89094	7.22724	11.1595
ENSDARG00000040334	4678.45	-0.316735	0.0665497	-4.75937	1.94196e-06	2.99279e-05	FALSE	5296.02	5049.16	4939.07	5266.66	4403.12	3810.64	3927.49	4354.07
ENSDARG00000055093	140.677	-1.18126	0.24821	-4.7591	1.94458e-06	2.99499e-05	FALSE	166.129	171.683	175.85	218.341	64.7672	40.3939	102.374	114.001
ENSDARG00000075825	114.259	0.852702	0.179182	4.75885	1.94703e-06	2.99691e-05	FALSE	103.162	93.4759	65.5808	92.7412	173.629	142.051	183.992	138.256
ENSDARG00000079552	1505.34	0.381519	0.0801773	4.75844	1.95096e-06	3.00113e-05	FALSE	1419.07	1307.05	1214.2	1294.8	1713.92	1696.89	1680.04	1720.6
ENSDARG00000051746	522.97	0.433089	0.091018	4.75828	1.95249e-06	3.00164e-05	FALSE	459.171	482.802	470.811	430.475	645.823	624.774	667.633	551.853
ENSDARG00000029995	15161.3	0.607747	0.127783	4.75609	1.97376e-06	3.03248e-05	FALSE	12434.7	12601.8	13570.3	13573.2	20906	21288.8	23403.4	13924.2
ENSDARG00000070081	262.913	0.77571	0.16312	4.75546	1.98e-06	3.0402e-05	FALSE	194.813	232.391	219.681	197.084	371.321	287.585	485.066	304.841
ENSDARG00000086569	618.395	-1.1562	0.243223	-4.75367	1.99759e-06	3.06534e-05	FALSE	698.035	964.641	1122.89	1205.39	247.293	712.661	375.976	456.005
ENSDARG00000036629	35977.1	0.320981	0.0675254	4.75349	1.99935e-06	3.06616e-05	FALSE	33226.7	31878.8	34786.6	34320.2	45383.6	39611.1	44481.8	38186.1
ENSDARG00000009470	60.4272	-1.25513	0.264085	-4.75278	2.00643e-06	3.07513e-05	FALSE	80.1147	115.906	117.795	90.1883	34.3369	47.1696	57.9905	30.7637
ENSDARG00000092319	21.3421	2.5269	0.531685	4.75263	2.00784e-06	3.07542e-05	FALSE	9.71144	3.03635	0.94023	7.72474	34.4792	37.9298	27.7024	19.5716
ENSDARG00000040282	16.03	-3.04379	0.640496	-4.75224	2.01173e-06	3.07949e-05	FALSE	45.6615	65.1754	13.0298	31.9091	3.95262	4.69898	8.12121	2.22537
ENSDARG00000005541	849.807	0.608431	0.128099	4.74969	2.0373e-06	3.11674e-05	FALSE	667.176	718.396	691.889	636.191	1222.12	791.428	1187.9	936.6
ENSDARG00000098893	45.4656	-1.74571	0.367654	-4.74824	2.05198e-06	3.13728e-05	FALSE	39.8549	77.0102	77.6938	85.3907	12.8774	20.5473	23.3765	26.6505
ENSDARG00000059059	988.533	0.408073	0.0859451	4.74806	2.05375e-06	3.13806e-05	FALSE	808.907	879.151	771.034	852.401	1159.69	1156.33	1061.2	1020.91
ENSDARG00000003984	648.179	-0.453608	0.0955602	-4.74683	2.06627e-06	3.15527e-05	FALSE	777.92	819.44	748.564	700.564	530.171	640.6	519.507	533.663
ENSDARG00000097368	185.443	1.05699	0.222737	4.74543	2.08059e-06	3.17521e-05	FALSE	130.643	114.357	119.934	161.254	405.77	237.249	272.079	184.039
ENSDARG00000076673	2460.67	-0.461938	0.0973513	-4.74506	2.08441e-06	3.17911e-05	FALSE	2729.24	2894.98	2849.6	2877.41	2192.47	1722.79	2057.55	2267.39
ENSDARG00000079124	145.056	0.777186	0.163796	4.74485	2.08663e-06	3.18056e-05	FALSE	129.223	110.176	84.6647	88.1116	189.3	169.441	185.235	155.578
ENSDARG00000060169	242.938	0.843055	0.17769	4.74453	2.08987e-06	3.18356e-05	FALSE	192.161	185.065	189.296	185.133	482.671	266.021	298.515	302.389
ENSDARG00000037362	614.75	0.360908	0.0760921	4.74304	2.10534e-06	3.20518e-05	FALSE	541.367	502.447	551.741	547.896	702.035	652.969	719.669	678.916
ENSDARG00000017489	105.071	1.40043	0.295588	4.73779	2.16062e-06	3.28735e-05	FALSE	60.9258	73.3329	60.1205	27.7284	136.311	82.1776	211.044	153.369
ENSDARG00000037574	1904.92	0.434302	0.0916956	4.73635	2.17606e-06	3.30882e-05	FALSE	1604.02	1592.72	1749.17	1843.31	2333.48	2329.94	2540.39	1978.23
ENSDARG00000019228	282.444	-1.04169	0.219976	-4.73547	2.18548e-06	3.32114e-05	FALSE	487.678	449.534	498.652	411.765	128.284	281.989	298.464	188.527
ENSDARG00000096556	24.0235	2.22107	0.469055	4.7352	2.18839e-06	3.32354e-05	FALSE	0	11.7983	8.8849	14.4747	52.1164	37.3423	28.0778	53.9038
ENSDARG00000060796	4967.1	0.40849	0.0862964	4.73357	2.20606e-06	3.34835e-05	FALSE	4242.73	4644.58	4606.55	4563.78	6008.78	5977.08	6944.9	5045.42
ENSDARG00000034677	1658.23	-0.669813	0.141534	-4.73253	2.21736e-06	3.36347e-05	FALSE	1934.68	1912.88	1973.92	1794.97	1128.17	807.048	1386.07	1462.46
ENSDARG00000054534	54.0203	-1.38401	0.292505	-4.73157	2.22786e-06	3.37735e-05	FALSE	91.9938	87.9153	87.7523	110.27	16.7033	51.7165	44.3618	32.1864
ENSDARG00000030254	26.1446	-2.86612	0.605834	-4.73086	2.23568e-06	3.38716e-05	FALSE	46.4325	38.9179	72.1426	65.6044	3.44673	21.2427	0	5.83707
ENSDARG00000034705	2733.83	-0.54565	0.115366	-4.72974	2.24812e-06	3.40209e-05	FALSE	3176.89	3428.35	3789.76	3537.37	2383.3	2635.39	2728.07	1803.53
ENSDARG00000086826	1969.77	-0.582259	0.123106	-4.72972	2.24825e-06	3.40209e-05	FALSE	2510.81	2562.29	2956.19	2627.7	1647.02	1559.31	2314.23	1599.05
ENSDARG00000003519	381.645	-0.751916	0.158985	-4.72948	2.25092e-06	3.40407e-05	FALSE	416.903	618.278	477.614	500.729	369.083	298.04	251.813	278.666
ENSDARG00000075698	61.1086	-1.24485	0.263236	-4.72904	2.25582e-06	3.40943e-05	FALSE	109.287	105.159	92.3332	86.6087	20.6068	49.0576	53.4534	42.0037
ENSDARG00000007709	144.387	1.32043	0.279235	4.72872	2.25943e-06	3.41283e-05	FALSE	88.8931	106.229	117.887	80.2985	394.49	166.386	276.32	147.003
ENSDARG00000071143	26.0672	7.39842	1.56463	4.72855	2.26128e-06	3.41357e-05	FALSE	0	0	0	0	0	35.0068	27.3017	71.7765
ENSDARG00000042825	1058.83	0.357075	0.0755467	4.72655	2.28369e-06	3.44532e-05	FALSE	878.405	896.702	983.719	960.949	1142.78	1280.73	1204.86	1144.55
ENSDARG00000057624	1040.1	-0.366023	0.0774504	-4.72591	2.29089e-06	3.45411e-05	FALSE	1153.27	1135.41	1156.36	1138.44	974.078	865.503	787.939	928.335
ENSDARG00000102160	12.4621	3.45423	0.730932	4.72578	2.2923e-06	3.45415e-05	FALSE	1.45925	5.36213	0.984808	1.80665	21.6072	31.6481	40.7496	11.9841
ENSDARG00000101992	99.4217	1.55015	0.32806	4.72519	2.29903e-06	3.46222e-05	FALSE	53.0307	49.6168	74.6999	50.2278	110.604	175.958	295.044	86.2392
ENSDARG00000093954	211.016	0.712818	0.150939	4.72255	2.3291e-06	3.50539e-05	FALSE	172.515	176.301	149.293	181.267	316.657	244.582	317.575	234.621
ENSDARG00000100498	236.048	-0.678419	0.143695	-4.72126	2.3439e-06	3.52555e-05	FALSE	256.107	319.946	388.016	328.891	231.384	180.397	202.13	197.534
ENSDARG00000015557	712.832	0.605551	0.128265	4.7211	2.34577e-06	3.52626e-05	FALSE	559.771	605.026	657.295	557.936	969.653	732.31	1123	799.071
ENSDARG00000100452	4993.74	0.608474	0.12891	4.72017	2.35651e-06	3.54027e-05	FALSE	4063.63	3766.6	4527.49	4150.88	5829.73	5930.99	8283.47	5129.98
ENSDARG00000103498	1916.63	-0.787927	0.166973	-4.71888	2.37143e-06	3.56056e-05	FALSE	2098.07	2483.35	2738.63	2578.3	1168.55	2134.87	1197.74	1234.29
ENSDARG00000099600	20.7208	-1.86634	0.39552	-4.71869	2.37367e-06	3.56179e-05	FALSE	36.4748	38.6101	43.3176	23.4827	5.89222	12.4721	8.15043	11.9862
ENSDARG00000097209	395.55	-0.567923	0.12036	-4.71853	2.37552e-06	3.56243e-05	FALSE	518.124	566.912	529.795	530.765	314.021	336.25	452.197	344.983
ENSDARG00000006775	156.862	0.72046	0.152715	4.71769	2.3854e-06	3.57511e-05	FALSE	106.138	119.214	133.06	126.057	234.205	174.913	212.16	181.91
ENSDARG00000058160	108.771	2.91507	0.617982	4.71708	2.3925e-06	3.5836e-05	FALSE	33.5485	30.0331	42.3141	31.6043	608.769	96.9491	270.798	61.4446
ENSDARG00000014499	554.172	-0.565067	0.119824	-4.7158	2.4076e-06	3.603e-05	FALSE	623.288	629.259	661.126	707.063	469.575	436.505	345.519	519.708
ENSDARG00000003244	588.461	0.581645	0.123341	4.71574	2.40832e-06	3.603e-05	FALSE	474.944	522.611	427.232	431.76	824.109	626.066	756.87	570.873
ENSDARG00000087327	602.716	0.377833	0.0801455	4.71434	2.42496e-06	3.62455e-05	FALSE	520.156	502.207	485.156	517.803	710.401	637.878	619.718	662.371
ENSDARG00000015559	555.753	0.820446	0.174034	4.71428	2.42562e-06	3.62455e-05	FALSE	478.191	411.456	469.579	378.302	898.854	489.813	968.232	708.578
ENSDARG00000033126	451.403	-0.431975	0.0916552	-4.71305	2.44039e-06	3.64445e-05	FALSE	572.785	481.908	512.779	550.362	394.154	421.417	385.391	368.087
ENSDARG00000098215	2476.12	0.370537	0.0786309	4.71236	2.44865e-06	3.65461e-05	FALSE	2259.59	2245.68	2148.8	2034.15	3160.43	2570.16	2746.23	2751.01
ENSDARG00000052368	308.994	-0.706608	0.149988	-4.7111	2.4638e-06	3.67504e-05	FALSE	392.51	430.2	333.762	322.031	195.718	201.355	231.743	273.443
ENSDARG00000015862	28152.6	0.336815	0.0714997	4.71072	2.46842e-06	3.67974e-05	FALSE	26169.2	25012.1	26628.5	26121.9	35714.6	30594.1	35639.3	29318.5
ENSDARG00000029381	277.21	-0.93643	0.198825	-4.70981	2.47943e-06	3.69395e-05	FALSE	374.46	414.428	389.672	363.451	110.417	246.375	251.962	196.342
ENSDARG00000074466	281.121	-0.73918	0.156954	-4.70954	2.48281e-06	3.6968e-05	FALSE	336.218	351.505	378.377	286.8	147.481	216.906	209.961	234.035
ENSDARG00000086098	425.561	0.732921	0.15568	4.70787	2.50315e-06	3.72349e-05	FALSE	320.464	315.521	350.45	329.192	666.143	504.41	623.395	396.17
ENSDARG00000104846	87.4254	0.973214	0.206723	4.70783	2.50371e-06	3.72349e-05	FALSE	59.0244	56.3531	71.8894	74.5683	141.618	111.068	148.908	116.075
ENSDARG00000090401	97.4032	1.68004	0.35692	4.70704	2.51341e-06	3.7357e-05	FALSE	48.2668	53.5709	71.2022	56.121	345.223	93.5341	194.539	103.876
ENSDARG00000100602	246.939	0.801031	0.170242	4.70526	2.53541e-06	3.76617e-05	FALSE	174.621	194.329	181.274	227.973	383.355	352.103	379.785	246.352
ENSDARG00000024877	1494.37	1.65449	0.351956	4.70085	2.59075e-06	3.84609e-05	FALSE	477.739	556.913	424.145	448.694	1536.96	1215.99	578.998	2671.6
ENSDARG00000103917	985.229	-0.812912	0.172967	-4.69981	2.60399e-06	3.86346e-05	FALSE	1212.16	1080.02	1309.14	1428.76	709.476	450.626	893.357	809.199
ENSDARG00000007406	746.168	0.423103	0.0900404	4.69903	2.61395e-06	3.87595e-05	FALSE	695.669	587.248	651.771	665.08	928.564	776.328	909.992	867.369
ENSDARG00000018283	356.65	1.05138	0.223757	4.69877	2.61732e-06	3.87865e-05	FALSE	267.497	273.353	242.07	261.048	823.56	362.97	602.194	375.732
ENSDARG00000017121	1331.42	0.498982	0.106199	4.69854	2.62029e-06	3.87881e-05	FALSE	1128.63	1149.51	1163.72	1175.81	1917.69	1443.71	1728.07	1440.22
ENSDARG00000070961	1022.75	0.653122	0.139006	4.69852	2.62053e-06	3.87881e-05	FALSE	873.634	797.669	873.598	900.201	1352.94	1279.65	1779.1	1008.3
ENSDARG00000041232	12389.9	0.550078	0.117092	4.69783	2.62934e-06	3.88956e-05	FALSE	11375.3	11087.6	10169.3	10396.2	20529.1	14068.8	15557.6	12845.7
ENSDARG00000103184	204.408	0.909578	0.193706	4.69567	2.65739e-06	3.92667e-05	FALSE	154.405	164.2	151.174	165.046	431.668	280.122	272.735	210.841
ENSDARG00000093024	70.838	1.35046	0.287599	4.69565	2.65756e-06	3.92667e-05	FALSE	36.3326	41.5125	46.0595	29.4249	66.882	117.722	74.1161	131.236
ENSDARG00000076402	86.0198	-1.08734	0.231575	-4.6954	2.66087e-06	3.92924e-05	FALSE	103.432	127.706	119.781	123.57	37.2826	80.8441	65.237	41.264
ENSDARG00000103979	5241.41	-0.310936	0.0662243	-4.6952	2.66349e-06	3.9308e-05	FALSE	5770.03	6010.38	5997.2	5523.44	4555.02	4421.14	4818.96	4984.22
ENSDARG00000052063	9384.01	-0.574315	0.122357	-4.69377	2.68221e-06	3.9561e-05	FALSE	11229.1	11275.4	10452.7	9492.12	6772.65	5495.72	7060.39	9174.12
ENSDARG00000096667	288.32	-0.652859	0.139112	-4.69304	2.69171e-06	3.96779e-05	FALSE	402.867	276.964	336.224	361.463	230.149	241.02	205.606	198.462
ENSDARG00000017388	837.726	-0.48159	0.102628	-4.69257	2.69788e-06	3.971e-05	FALSE	929.729	1091.31	1068.05	998.419	626.913	677.145	868.329	755.507
ENSDARG00000061977	778.557	0.561253	0.119606	4.69252	2.69865e-06	3.971e-05	FALSE	757.892	645.737	625.388	581.138	947.526	1063.44	1043.2	787.131
ENSDARG00000094683	29.0256	1.78785	0.380982	4.69275	2.69557e-06	3.971e-05	FALSE	9.74384	17.8638	8.21442	13.9597	35.6735	65.2821	44.9997	25.992
ENSDARG00000037517	1388.83	-0.43432	0.0926112	-4.68971	2.73588e-06	4.02343e-05	FALSE	1531.88	1908.74	1672.52	1632.23	1141.06	1152.03	1404.55	1291.66
ENSDARG00000088835	542.852	-0.38596	0.0823053	-4.68937	2.7405e-06	4.02787e-05	FALSE	572.258	590.346	596.459	624.814	471.787	464.329	423.199	467.616
ENSDARG00000007836	11357.7	0.728224	0.15534	4.68793	2.7598e-06	4.05385e-05	FALSE	9971.11	9936.16	9736.85	9212.36	15768.1	14705.3	22822.9	11073.8
ENSDARG00000059093	588.462	-0.811543	0.173118	-4.6878	2.76155e-06	4.05405e-05	FALSE	780.743	671.972	694.566	831.259	301.876	614.304	344.269	436.445
ENSDARG00000037357	71.7206	1.16763	0.249092	4.68754	2.76505e-06	4.05681e-05	FALSE	62.8998	49.2831	48.4664	32.5895	98.3606	87.7881	137.529	104.612
ENSDARG00000056726	261.408	-0.731349	0.156029	-4.68727	2.76868e-06	4.05976e-05	FALSE	322.929	299.205	331.645	313.452	134.179	236.822	181.639	209.902
ENSDARG00000037433	2858.18	0.374404	0.0798832	4.6869	2.77381e-06	4.0649e-05	FALSE	2563.56	2492.09	2461.62	2546.96	3529.23	3089.02	3611.35	2819.26
ENSDARG00000088567	171.66	0.809383	0.17272	4.68609	2.78478e-06	4.0786e-05	FALSE	135.126	114.025	113.616	156.911	221.752	225.377	242.444	220.463
ENSDARG00000028816	603.739	-0.491052	0.104823	-4.68456	2.80565e-06	4.10436e-05	FALSE	710.769	826.096	739.582	666.153	551.734	542.226	497.674	502.986
ENSDARG00000056379	330.474	0.741935	0.158376	4.68463	2.80468e-06	4.10436e-05	FALSE	303.995	249.225	269.974	289.792	614.272	424	467.141	356.532
ENSDARG00000056615	94.3247	1.08674	0.232156	4.6811	2.85335e-06	4.17172e-05	FALSE	72.7911	68.7006	58.8388	73.0165	175.549	103.123	187.598	114.113
ENSDARG00000089814	6.14051	-6.51663	1.39265	-4.67931	2.87841e-06	4.2059e-05	FALSE	13.5469	25.2465	11.5433	10.2226	0	0	0	0
ENSDARG00000087804	259.788	0.796305	0.170193	4.67883	2.88517e-06	4.21332e-05	FALSE	190.692	256.565	194.13	190.185	429.526	294.978	437.746	283.811
ENSDARG00000099153	20.5562	-2.13479	0.456332	-4.67816	2.89457e-06	4.22459e-05	FALSE	22.1041	34.1873	68.2425	44.7157	5.93218	15.0143	9.02066	8.89475
ENSDARG00000046142	163.838	-1.27165	0.271878	-4.67726	2.90733e-06	4.24074e-05	FALSE	233.79	200.149	304.727	328.892	72.1118	186.839	91.0262	93.3707
ENSDARG00000023157	156.164	-1.32774	0.283888	-4.67698	2.9113e-06	4.24407e-05	FALSE	191.626	230.344	288.823	309.602	40.328	145.039	127.576	94.1503
ENSDARG00000087788	57.0088	1.44503	0.309054	4.67564	2.93032e-06	4.26931e-05	FALSE	18.6929	34.1424	30.177	27.7855	46.9358	58.4403	106.975	94.2151
ENSDARG00000014340	248.204	-0.936404	0.200379	-4.67317	2.96592e-06	4.31867e-05	FALSE	331.716	356.914	352.468	264.1	160.228	105.185	193.694	220.652
ENSDARG00000062019	1846.9	0.370358	0.0792832	4.67133	2.99255e-06	4.34987e-05	FALSE	1625	1618.1	1730	1533.19	2172.81	1829.46	2314.43	2092.51
ENSDARG00000103266	555.925	-0.906427	0.194036	-4.67144	2.99098e-06	4.34987e-05	FALSE	673.742	763.767	837.101	822.459	263.11	545.464	414.832	429.453
ENSDARG00000020718	256.4	-0.960469	0.205602	-4.67149	2.99015e-06	4.34987e-05	FALSE	323.995	369.067	281.434	284.465	108.706	236.594	119.948	180.62
ENSDARG00000104004	229.972	1.50643	0.322551	4.67035	3.00692e-06	4.36823e-05	FALSE	78.0985	115.32	74.6967	164.39	231.356	317.925	460.846	223.401
ENSDARG00000009783	774.132	0.452721	0.0969481	4.66973	3.01598e-06	4.37648e-05	FALSE	707.836	664.348	628.102	653.794	981.962	918.598	972.288	758.679
ENSDARG00000100952	1053.76	0.636683	0.136343	4.66972	3.0161e-06	4.37648e-05	FALSE	991.958	885.091	1040.61	950.115	1725.27	1221.64	1841.25	1226.41
ENSDARG00000074131	4431.11	-0.255035	0.0547187	-4.66083	3.14935e-06	4.56611e-05	FALSE	4790.18	4874.11	4927.02	4623.64	3900.25	3876.54	4118.94	4200.97
ENSDARG00000042803	346.833	-0.484638	0.103982	-4.66076	3.15042e-06	4.56611e-05	FALSE	369.883	388.88	404.457	400.638	253.112	320.907	257.988	286.842
ENSDARG00000045071	1001.75	0.389217	0.0835162	4.66038	3.15628e-06	4.57196e-05	FALSE	789.905	862.677	815.512	941.099	1169.79	1177.96	1044.55	1082.18
ENSDARG00000014727	1631.14	-0.425857	0.0914272	-4.65788	3.19485e-06	4.62515e-05	FALSE	2021.09	1820.82	2074.7	1940.75	1200.05	1621.86	1558.17	1466.92
ENSDARG00000018980	260.084	0.576608	0.123837	4.65619	3.2212e-06	4.66049e-05	FALSE	218.858	217.715	234.325	182.449	355.506	305.062	314.24	296.648
ENSDARG00000070396	54.3146	1.85579	0.398573	4.65607	3.22298e-06	4.66049e-05	FALSE	16.0549	21.4468	34.4802	24.3939	144.392	91.0716	41.6525	75.6355
ENSDARG00000058570	16.8424	-2.18774	0.470002	-4.65475	3.24379e-06	4.68789e-05	FALSE	32.519	21.3722	29.2806	34.9191	2.98221	5.63457	6.2753	10.4175
ENSDARG00000016457	255.531	0.893701	0.192052	4.65344	3.26446e-06	4.71504e-05	FALSE	221.925	183.857	227.597	155.842	479.801	288.356	387.012	305.266
ENSDARG00000078853	443.587	-0.863939	0.185682	-4.65278	3.27484e-06	4.72731e-05	FALSE	650.482	506.345	443.264	534.115	214.4	261.085	310.608	381.128
ENSDARG00000002670	756.188	0.486345	0.104552	4.65171	3.2919e-06	4.74919e-05	FALSE	674.133	658.779	668.311	574.595	903.68	873.167	1014.22	814.365
ENSDARG00000020944	3110.61	-0.505684	0.10873	-4.65081	3.30639e-06	4.76736e-05	FALSE	3622.29	4849.07	4219.12	3826.68	2699.41	2908.89	3476.13	2551.32
ENSDARG00000020007	38066.2	-0.343498	0.0738681	-4.65016	3.31682e-06	4.77936e-05	FALSE	41924.2	40938.3	40407.3	39459.1	33940.5	31424.9	29111.8	33770.4
ENSDARG00000097197	29.8956	1.88265	0.404866	4.65005	3.31852e-06	4.77936e-05	FALSE	13.7361	12.156	13.5364	15.5154	55.1007	29.2672	75.6982	43.7996
ENSDARG00000039347	23460.4	0.300416	0.064615	4.64933	3.33019e-06	4.79208e-05	FALSE	21874.7	21405.2	22018.1	22522.5	28870	24005.2	28868.1	26410.6
ENSDARG00000001452	169.386	1.56324	0.336233	4.64927	3.33118e-06	4.79208e-05	FALSE	85.7763	106.058	82.0242	125.068	393.171	170.814	483.755	134.066
ENSDARG00000105114	218.586	0.694774	0.149487	4.64772	3.35628e-06	4.82542e-05	FALSE	154.501	207.076	164.119	175.966	262.044	271.106	356.021	249.705
ENSDARG00000030125	358.887	0.777028	0.167191	4.64754	3.35914e-06	4.82676e-05	FALSE	300.184	287.462	301.54	280.439	698.997	398.489	508.956	399.341
ENSDARG00000034714	311.691	-0.525331	0.113066	-4.64621	3.38082e-06	4.85514e-05	FALSE	413.158	357.561	399.591	347.734	221.544	269.293	276.48	283.229
ENSDARG00000037810	305.912	-0.741832	0.159687	-4.64554	3.39186e-06	4.8682e-05	FALSE	300.203	390.874	384.543	376.053	172.248	204.686	198.98	291.102
ENSDARG00000095451	1486.57	0.475239	0.102318	4.6447	3.40565e-06	4.8852e-05	FALSE	1311.95	1316.71	1163.25	1310.55	2163.58	1587.33	1736.61	1607.19
ENSDARG00000094120	28.7327	-2.8168	0.606534	-4.64409	3.41578e-06	4.89693e-05	FALSE	37.892	46.1382	92.3589	56.8448	1.96274	20.1936	3.62377	7.49951
ENSDARG00000016750	198.503	1.03324	0.222515	4.64346	3.42627e-06	4.90916e-05	FALSE	120.673	163.251	148.703	148.562	439.001	271.573	305.551	178.159
ENSDARG00000040186	364.304	-0.543432	0.117037	-4.64323	3.42996e-06	4.91164e-05	FALSE	437.138	432.929	465.419	475.037	345.132	296.138	353.841	251.202
ENSDARG00000007024	1160.78	-1.78719	0.384978	-4.6423	3.4455e-06	4.93108e-05	FALSE	1580.6	1685.58	2276.28	2289.08	172.227	782.401	578.466	735.748
ENSDARG00000054931	1640.8	0.429173	0.0924643	4.6415	3.45885e-06	4.94736e-05	FALSE	1286.17	1219.17	1297.65	1469.14	1789.42	1780.98	1532.23	1998.18
ENSDARG00000035630	704.802	0.434923	0.093706	4.64135	3.46138e-06	4.94815e-05	FALSE	644.193	569.221	585.073	597.642	738.057	891.907	869.926	736.28
ENSDARG00000013122	1498.59	0.253465	0.0546211	4.64041	3.47713e-06	4.96783e-05	FALSE	1339.52	1335.3	1408.52	1389.27	1609.48	1663.03	1638.47	1618.41
ENSDARG00000089340	624.799	0.509552	0.109854	4.63845	3.51029e-06	5.01235e-05	FALSE	531.149	519.637	565.401	438.835	708.873	778.45	777.693	658.677
ENSDARG00000018976	403.258	0.437155	0.0942506	4.63822	3.51418e-06	5.01505e-05	FALSE	361.577	357.955	351.418	300.3	457.989	469.117	450	473.201
ENSDARG00000003035	9559.17	-0.221298	0.047729	-4.63657	3.54245e-06	5.05252e-05	FALSE	10505.6	10535.3	10071.5	10334.1	9321.39	8960.83	8828.91	8441.23
ENSDARG00000088408	24.0982	2.07245	0.447055	4.63579	3.55585e-06	5.06876e-05	FALSE	10.2052	13.9469	3.93257	2.70771	35.3367	34.5931	22.6459	32.2371
ENSDARG00000038910	1992.77	-0.338587	0.0730398	-4.63565	3.55811e-06	5.0691e-05	FALSE	2381.26	2373.5	2257.15	2293.54	1934.04	1963.97	1802.39	1660.69
ENSDARG00000069409	287.962	-0.512743	0.110658	-4.63357	3.59405e-06	5.11739e-05	FALSE	352.525	364.011	314.5	337.597	235.691	249.185	232.387	240.825
ENSDARG00000008403	104.223	-1.38541	0.299337	-4.62826	3.68753e-06	5.24752e-05	FALSE	147.353	167.313	159.477	129.151	42.2266	48.9326	98.7119	41.2041
ENSDARG00000060041	2005.87	-0.374065	0.0808267	-4.62799	3.6923e-06	5.25132e-05	FALSE	2201.08	2136.21	1947.37	2317.48	1666.18	1725.34	1537.07	1708.04
ENSDARG00000075676	356.87	-0.742635	0.160509	-4.62676	3.71432e-06	5.27964e-05	FALSE	348.983	461.143	375.23	463.526	224.022	255.256	258.106	249.078
ENSDARG00000071662	276.189	0.889942	0.192395	4.6256	3.73514e-06	5.30623e-05	FALSE	221.072	155.818	205.766	126.429	388.968	239.835	354.303	324.814
ENSDARG00000044982	427.811	0.74249	0.160527	4.62533	3.74007e-06	5.31022e-05	FALSE	333.063	344.1	346.329	328.216	796.057	456.448	550.373	460.908
ENSDARG00000096166	9.51525	-2.9127	0.629831	-4.62458	3.75357e-06	5.32638e-05	FALSE	17.5201	10.4083	26.273	17.4391	4.2928	2.11271	2.03773	1.23348
ENSDARG00000057683	1872.9	-0.660262	0.142792	-4.62394	3.76521e-06	5.33987e-05	FALSE	2137.56	2306.8	2047.79	2091.36	1350.16	1625.75	909.842	1544.8
ENSDARG00000096963	13.1435	4.12175	0.891499	4.6234	3.77503e-06	5.35077e-05	FALSE	0	0	7.08934	0	37.7902	30.9421	36.1164	23.7834
ENSDARG00000098288	518.509	-0.448471	0.0970087	-4.62299	3.78243e-06	5.35823e-05	FALSE	582.492	601.956	589.765	595.985	381.535	493.796	398.719	462.135
ENSDARG00000002369	4865.05	0.434832	0.0941057	4.62068	3.82491e-06	5.41535e-05	FALSE	4358.41	4188.77	4397.5	4063.75	6211.74	5728.17	6100.06	4953.04
ENSDARG00000092806	40.3018	2.43192	0.526577	4.61835	3.86801e-06	5.47328e-05	FALSE	4.40276	13.8938	5.97376	3.63126	13.794	46.7638	33.4045	56.5189
ENSDARG00000036695	2136.06	0.365312	0.0791038	4.61813	3.87205e-06	5.4759e-05	FALSE	1903.28	1853.74	1981.51	1994.04	2425.4	2422.45	2820.09	2297.18
ENSDARG00000101300	124.311	-0.839888	0.181884	-4.61771	3.87994e-06	5.48397e-05	FALSE	173.864	182.22	161.983	137.442	83.8594	105.326	78.0599	97.4434
ENSDARG00000092807	41246.7	0.349338	0.0756846	4.61571	3.91752e-06	5.53397e-05	FALSE	38742.7	39677	35962.8	37301.3	53510.9	46543.3	50863.7	42325.5
ENSDARG00000035324	4008.96	-0.464845	0.10072	-4.6152	3.9272e-06	5.54452e-05	FALSE	4759.98	4431.85	4593.64	4478.96	3223.73	3674.84	2620.12	3712.41
ENSDARG00000092717	14.805	2.61144	0.565924	4.61447	3.941e-06	5.56087e-05	FALSE	0	6.41976	2.01454	4.57991	18.8271	14.0566	28.8799	22.2416
ENSDARG00000098566	170.386	1.01022	0.218936	4.61423	3.94551e-06	5.56411e-05	FALSE	59.7674	87.9759	106.161	101.982	143.301	142.245	173.021	262.42
ENSDARG00000055502	3036.66	0.317938	0.0689064	4.61406	3.94874e-06	5.56553e-05	FALSE	2768.04	2598.64	2738.63	2875.19	3657.11	3472.92	3456.62	3106.95
ENSDARG00000031126	176.925	-0.88844	0.192565	-4.61371	3.95548e-06	5.56876e-05	FALSE	216.068	225.168	194.166	177.123	81.5409	104.436	104.122	145.991
ENSDARG00000042977	645.682	0.919928	0.199386	4.6138	3.95365e-06	5.56876e-05	FALSE	561.925	413.923	524.105	456.259	1337.84	671.045	1053.08	638.03
ENSDARG00000068667	31.2545	1.72574	0.374078	4.61331	3.96297e-06	5.57618e-05	FALSE	6.07977	11.1803	7.35409	15.4638	41.2258	32.1512	34.0747	28.6932
ENSDARG00000039752	260.645	-0.983022	0.213097	-4.61304	3.9683e-06	5.58055e-05	FALSE	424.198	469.922	369.59	418.753	266.971	219.139	235.526	131.212
ENSDARG00000061233	9113.18	0.448915	0.097325	4.61253	3.97797e-06	5.58788e-05	FALSE	8277.5	8117.31	7830.61	8658.98	13253.8	11859	10360	9417.38
ENSDARG00000096505	61.2662	-1.35729	0.29426	-4.61255	3.97764e-06	5.58788e-05	FALSE	104.677	103.624	106.494	108.72	19.7831	46.8492	67.6279	31.11
ENSDARG00000088116	546.236	-0.632716	0.137254	-4.60982	4.03019e-06	5.65806e-05	FALSE	615.375	761.342	600.651	629.894	400.612	312.9	491.465	475.011
ENSDARG00000087873	511.311	-0.948734	0.205914	-4.60744	4.07664e-06	5.72008e-05	FALSE	737.241	739.845	604.156	696.729	258.373	344.942	306.03	527.078
ENSDARG00000100020	3150.43	0.552509	0.119922	4.60725	4.0802e-06	5.72187e-05	FALSE	2710.64	2647.69	2706.16	2460.55	4723.99	3244.86	4296.02	3172.01
ENSDARG00000035438	3842.92	-1.30831	0.284111	-4.60492	4.12615e-06	5.78307e-05	FALSE	4847.35	7031.42	7266.06	7828.64	2318.07	4349.94	2567.37	1658.09
ENSDARG00000017741	2998.94	-0.411273	0.0893172	-4.60463	4.13205e-06	5.7881e-05	FALSE	3513.16	3498.44	3398.97	3423.45	3164.34	2434.48	2347.91	2460.6
ENSDARG00000051915	209.28	-1.08722	0.236152	-4.60391	4.14631e-06	5.80483e-05	FALSE	241.995	248.713	288.859	277.729	62.9372	144.567	128.08	161.972
ENSDARG00000045560	1607.63	-0.463855	0.100768	-4.60318	4.16086e-06	5.82195e-05	FALSE	1532.91	1982.43	1715.23	2201.78	1394.87	1310.5	1344.94	1341.28
ENSDARG00000103826	2004.44	-0.363476	0.0789699	-4.60272	4.17008e-06	5.83161e-05	FALSE	2258.28	2241.04	2361.13	2280.72	1581.6	2001.92	1684.11	1837.42
ENSDARG00000101406	14084.7	0.521781	0.11337	4.60245	4.17557e-06	5.83603e-05	FALSE	13179.3	11821.8	12131.2	12591.9	21661.4	15822.8	19815.8	14091.4
ENSDARG00000096257	91398.5	0.482802	0.104913	4.60194	4.18569e-06	5.84691e-05	FALSE	78906.1	78212.1	75372.6	81126.3	120330	118386	117997	81558.7
ENSDARG00000102291	12803.5	0.425972	0.0925697	4.60164	4.19183e-06	5.85223e-05	FALSE	12448	11043	11940	11718.2	15300.5	15221.7	18969.2	13850.5
ENSDARG00000028066	2807.28	0.302833	0.0658121	4.60149	4.19484e-06	5.85317e-05	FALSE	2338.17	2496.61	2532.03	2623.5	3312.57	3129.53	2809.12	3083.88
ENSDARG00000001754	1133.72	0.463125	0.100662	4.6008	4.20866e-06	5.86918e-05	FALSE	769.553	979.991	914.919	968.521	1361.9	1303.33	1304.82	1051.1
ENSDARG00000056407	65.1573	1.39101	0.302353	4.60061	4.21265e-06	5.87148e-05	FALSE	26.2897	50.386	34.5229	42.4894	143.471	94.7706	94.1487	74.8361
ENSDARG00000093201	176.099	0.980491	0.213134	4.60035	4.21774e-06	5.87531e-05	FALSE	107.365	132.759	115.217	124.774	206.983	230.018	347.055	165.975
ENSDARG00000075549	1382.66	0.460855	0.1002	4.59936	4.23783e-06	5.90002e-05	FALSE	1211.9	1243.23	1158.7	1175.17	1613.19	1395.95	2013.8	1566.65
ENSDARG00000104899	76.7856	3.88659	0.84505	4.59925	4.24024e-06	5.90009e-05	FALSE	6.98586	7.53131	4.04703	2.49292	4.98455	119.809	70.5117	114.675
ENSDARG00000074635	4061.08	0.473371	0.102939	4.59855	4.25446e-06	5.91661e-05	FALSE	3358.2	3405.72	3736.62	4091.43	5319.85	5214.7	5700.68	4034.45
ENSDARG00000073850	49.1002	-1.79756	0.391004	-4.59728	4.28044e-06	5.94943e-05	FALSE	81.3993	146.562	66.3139	71.8727	16.147	43.3809	31.0991	15.6034
ENSDARG00000089109	1162.47	0.425058	0.0924697	4.59673	4.29176e-06	5.96185e-05	FALSE	967.743	900.764	1043.66	1074.14	1488.37	1301.18	1333.3	1236.2
ENSDARG00000030782	821.721	-0.564562	0.122831	-4.59625	4.30167e-06	5.96976e-05	FALSE	992.364	1250.73	1066.74	930.415	614.672	774.223	803.223	675.21
ENSDARG00000093440	161.279	1.26109	0.274376	4.59622	4.30221e-06	5.96976e-05	FALSE	133.337	103.852	112.108	79.7815	428.309	154.047	245.963	196.944
ENSDARG00000059741	337.121	0.786889	0.171208	4.5961	4.30481e-06	5.97007e-05	FALSE	245.518	301.904	306.134	216.441	628.803	447.961	410.666	361.375
ENSDARG00000014825	2602.6	0.273499	0.0595163	4.59536	4.3201e-06	5.98796e-05	FALSE	2296.76	2275.64	2322.01	2488.38	2850.18	2775.3	2712.42	3006.4
ENSDARG00000097583	374.882	0.93237	0.202914	4.59489	4.3297e-06	5.99795e-05	FALSE	241.304	308.337	278.497	267.441	434.423	547.35	765.489	346.239
ENSDARG00000017728	1692.52	-0.518598	0.112868	-4.59474	4.33289e-06	5.99905e-05	FALSE	1980.81	1972.94	1994.54	1919.3	1493.87	1302.86	1119.09	1574.33
ENSDARG00000090618	183.898	-1.17012	0.25476	-4.59304	4.36832e-06	6.04477e-05	FALSE	300.997	298.561	381.637	293.558	64.6798	190.335	177.701	133.788
ENSDARG00000094670	24.0297	1.97765	0.430664	4.59208	4.38841e-06	6.06923e-05	FALSE	5.86507	12.8439	11.9205	5.44303	21.6709	45.5769	37.0663	38.7651
ENSDARG00000057741	130.622	-0.769357	0.167556	-4.59166	4.39741e-06	6.07832e-05	FALSE	164.885	179.1	209.74	157.17	89.3717	127.568	94.179	106.366
ENSDARG00000060518	732.45	-0.440386	0.0959255	-4.59091	4.41309e-06	6.09663e-05	FALSE	886.846	946.854	857.842	748.106	594.548	668.768	602.515	665.259
ENSDARG00000023766	936.428	0.512961	0.11176	4.58986	4.4354e-06	6.12407e-05	FALSE	763.597	816.571	823.228	831.848	1307.11	1075.29	1275.61	964.528
ENSDARG00000094640	71.804	1.35476	0.295226	4.5889	4.45588e-06	6.14896e-05	FALSE	21.0509	50.8481	48.3047	25.6065	96.2168	79.3331	111.511	85.3675
ENSDARG00000038141	6855.98	0.347159	0.0756626	4.58825	4.46973e-06	6.16469e-05	FALSE	6243.46	5834.78	6056.93	6117.99	8678.89	7271.44	7911.44	6991.14
ENSDARG00000101214	100.062	0.971437	0.211769	4.58724	4.49135e-06	6.19109e-05	FALSE	64.6157	44.2967	62.7087	69.9654	130.928	115.456	142.514	83.8529
ENSDARG00000015803	104.4	1.30062	0.283625	4.5857	4.52458e-06	6.23347e-05	FALSE	48.0355	88.0276	78.4323	50.4743	181.417	192.809	194.858	87.098
ENSDARG00000062003	2249.51	-0.699337	0.152551	-4.58428	4.55546e-06	6.27258e-05	FALSE	2334.69	2575.76	2788.41	2487.34	1098.72	1826.26	1309.05	2038.91
ENSDARG00000024092	1058.59	0.343485	0.074946	4.58311	4.58119e-06	6.30454e-05	FALSE	952.755	952.472	963.49	886.348	1062.54	1215.53	1278.21	1203.69
ENSDARG00000099577	535.539	0.609162	0.132926	4.58272	4.5896e-06	6.31264e-05	FALSE	437.76	385.524	477.69	470.129	745.861	619.08	814.11	526.793
ENSDARG00000031136	282.581	1.79266	0.391283	4.58149	4.61666e-06	6.34638e-05	FALSE	157.107	147.026	143.02	165.743	1000.54	359.627	542.711	221.464
ENSDARG00000101115	484.251	0.463747	0.101233	4.58098	4.62812e-06	6.35866e-05	FALSE	414.937	439.312	422.285	480.854	641.09	642.327	611.289	536.22
ENSDARG00000096888	125.054	-1.49845	0.327135	-4.58053	4.63798e-06	6.36523e-05	FALSE	168.269	194.967	178.133	183.816	96.4106	82.967	18.9989	59.0143
ENSDARG00000079332	23.3393	2.16509	0.472664	4.58063	4.63587e-06	6.36523e-05	FALSE	11.3974	6.48796	8.49526	9.36365	51.2566	37.6559	33.3841	37.1386
ENSDARG00000105001	1684.99	0.568458	0.124145	4.57897	4.67277e-06	6.4028e-05	FALSE	1438.9	1496.04	1377.84	1346.04	2540.35	1952.43	2335.85	1565.15
ENSDARG00000068830	139.797	-0.707014	0.154398	-4.57916	4.66855e-06	6.4028e-05	FALSE	197.53	171.781	186.694	181.233	92.2533	118.224	129.492	110.624
ENSDARG00000041873	26.0615	2.12247	0.463528	4.57896	4.67301e-06	6.4028e-05	FALSE	14.0638	12.7677	5.92691	3.16551	30.9689	46.9414	40.4209	30.7958
ENSDARG00000101422	169.23	0.717595	0.156722	4.57878	4.67695e-06	6.40469e-05	FALSE	108.073	125.097	112.701	145.621	209.808	178.602	239.877	185.191
ENSDARG00000057884	161.659	0.940171	0.205438	4.57641	4.73016e-06	6.47402e-05	FALSE	111.2	125.337	105.884	95.9796	263.648	149.733	267.797	159.867
ENSDARG00000042823	1210.58	-0.357468	0.078129	-4.57535	4.75423e-06	6.50342e-05	FALSE	1511.35	1284.52	1380.17	1320.55	1100.12	1096.3	1040.65	1048.43
ENSDARG00000045661	59.7977	1.11214	0.243123	4.57441	4.77567e-06	6.52918e-05	FALSE	36.1796	51.61	36.6571	44.7871	96.425	74.0763	117.089	79.4303
ENSDARG00000102538	1830.34	-0.292822	0.0640189	-4.574	4.78509e-06	6.53642e-05	FALSE	2013.67	2086.06	2143.06	1935.06	1668.1	1792.28	1648.03	1570.73
ENSDARG00000069013	1198.41	-0.423433	0.0925748	-4.57395	4.78618e-06	6.53642e-05	FALSE	1423.37	1422.48	1336.47	1297.51	858.916	984.774	1057.99	1177.26
ENSDARG00000010844	1303.02	-0.462957	0.10123	-4.57332	4.80048e-06	6.55239e-05	FALSE	1480.38	1412.68	1452.23	1468.13	913.104	1088.72	936.501	1274.71
ENSDARG00000098453	969.085	-0.37709	0.0824566	-4.5732	4.80342e-06	6.55282e-05	FALSE	1098.86	1075.33	1115.58	1093.09	838.094	789.868	809.532	934.667
ENSDARG00000094436	4.696	-6.41588	1.40311	-4.5726	4.81718e-06	6.56802e-05	FALSE	13.3406	6.29584	29.5737	7.14199	0	0	0	0
ENSDARG00000086685	1146.87	0.653045	0.142855	4.57137	4.84534e-06	6.60283e-05	FALSE	871.555	979.355	1049.86	865.198	1743.61	1460.88	1676.77	1045.69
ENSDARG00000086612	149.901	0.966616	0.211463	4.57108	4.85217e-06	6.60855e-05	FALSE	99.0562	122	107.129	119.398	238.822	208.543	291.717	139.424
ENSDARG00000078738	8.85523	4.40359	0.963426	4.57077	4.85945e-06	6.61487e-05	FALSE	1.45806	2.14654	0.983106	0	35.3438	25.9641	25.3734	6.00073
ENSDARG00000076958	12.0422	5.4607	1.19499	4.56965	4.88548e-06	6.64669e-05	FALSE	0	0	0	2.72557	29.6034	1.90754	79.7742	23.188
ENSDARG00000039173	9.89723	-5.51124	1.20674	-4.56705	4.94634e-06	6.72585e-05	FALSE	13.1454	23.509	6.91781	6.32681	0	0	0.902494	0
ENSDARG00000070490	19.8863	-2.39278	0.524034	-4.56607	4.96952e-06	6.7537e-05	FALSE	61.4421	46.6939	12.8839	38.8709	8.98306	5.95041	8.92038	6.68218
ENSDARG00000052512	108.478	0.980723	0.214842	4.56485	4.99855e-06	6.78947e-05	FALSE	72.1106	100.773	68.7413	55.5368	160.789	154.608	123.688	139.26
ENSDARG00000009629	927.371	0.343957	0.0753522	4.56465	5.00319e-06	6.7921e-05	FALSE	838.338	868.548	759.506	843.4	1121.13	1023.84	1026.17	1028.98
ENSDARG00000023062	785.75	0.934416	0.204739	4.56395	5.02007e-06	6.81132e-05	FALSE	651.489	576.178	667.214	569.379	1447.57	816.302	1642.44	803.153
ENSDARG00000079980	47.4135	-1.38488	0.303565	-4.56205	5.06575e-06	6.86959e-05	FALSE	63.4407	64.1323	83.5976	74.2393	25.7432	38.3078	19.8081	25.8958
ENSDARG00000057121	168.713	2.13629	0.468405	4.56077	5.09665e-06	6.90776e-05	FALSE	74.3254	60.0874	57.968	122.711	464.182	197.136	594.302	131.994
ENSDARG00000030494	319.599	0.586879	0.128709	4.55973	5.12183e-06	6.93813e-05	FALSE	273.073	317.347	257.362	277.494	487.356	436.676	415.546	353.286
ENSDARG00000056427	3026.25	0.395677	0.0867942	4.5588	5.1447e-06	6.96424e-05	FALSE	2795.46	2657.41	2641.64	2672.52	4168.11	3208.59	3503.33	3283.99
ENSDARG00000034943	361.454	-0.782384	0.171624	-4.55872	5.14666e-06	6.96424e-05	FALSE	437.466	481.657	411.125	380.963	211.069	171.921	267.201	341.036
ENSDARG00000070721	267.95	0.6881	0.150994	4.55713	5.18569e-06	7.01327e-05	FALSE	183.047	265.856	226.471	201.444	311.191	403.903	396.682	304.998
ENSDARG00000074160	45.328	-1.34104	0.294324	-4.55634	5.20539e-06	7.03611e-05	FALSE	60.3791	66.247	49.0895	50.1248	11.8555	30.0906	17.1469	28.9374
ENSDARG00000057844	11.8635	5.82896	1.27953	4.55555	5.2248e-06	7.05855e-05	FALSE	0	0	0	0	3.94132	23.9826	14.5205	3.00049
ENSDARG00000097215	95.6712	1.02562	0.225292	4.5524	5.30364e-06	7.1612e-05	FALSE	62.7657	85.7842	59.1186	67.7663	136.542	118.85	191.052	115.315
ENSDARG00000031108	1363.91	-0.37604	0.0826723	-4.54856	5.40135e-06	7.28921e-05	FALSE	1473.13	1701.8	1463.94	1446.9	1066.87	1125.49	1226.48	1266.94
ENSDARG00000068680	1629.57	-1.6435	0.361333	-4.54843	5.4047e-06	7.2898e-05	FALSE	2249.52	3466.1	3685.3	3301.83	734.505	1355.22	1316.81	660.067
ENSDARG00000101312	369.897	-1.12254	0.246815	-4.54811	5.41291e-06	7.29696e-05	FALSE	593.213	535.764	512.852	477.114	197.119	271.646	125.34	376.925
ENSDARG00000055288	279.832	-0.645453	0.141941	-4.54733	5.43307e-06	7.3202e-05	FALSE	310.525	320.165	325.213	343.501	157.506	229.329	196.251	246.261
ENSDARG00000016074	499.378	-0.472157	0.103835	-4.54717	5.43722e-06	7.32186e-05	FALSE	643.572	554.443	645.172	576.915	376.61	432.285	471.214	460.129
ENSDARG00000062198	2726.65	0.232848	0.0512346	4.54474	5.50032e-06	7.40285e-05	FALSE	2485	2425.58	2435.31	2521.81	2989.26	2755.2	3000.88	2851.52
ENSDARG00000070972	899.205	0.421316	0.0927218	4.54387	5.52311e-06	7.42953e-05	FALSE	830.983	739.624	827.986	771.108	1035.85	1048.53	1195.03	963.89
ENSDARG00000102308	1527.37	-0.277974	0.0611783	-4.54367	5.5284e-06	7.43266e-05	FALSE	1762	1665.3	1690.88	1665.02	1375.47	1469.55	1327.04	1418.19
ENSDARG00000098684	7.68602	5.71122	1.25743	4.54197	5.57298e-06	7.48858e-05	FALSE	0	0	0	0	7.09624	19.129	8.94106	6.65512
ENSDARG00000104596	472.675	0.579541	0.127621	4.5411	5.59624e-06	7.51581e-05	FALSE	377.115	372.463	434.546	416.521	587.506	558.804	741.292	508.927
ENSDARG00000043802	680.307	0.69399	0.152913	4.53847	5.66645e-06	7.60602e-05	FALSE	629.985	586.717	579.107	510.727	1008.21	708.981	1241.08	769.96
ENSDARG00000043848	2635.38	-0.313474	0.0691022	-4.53639	5.72259e-06	7.67727e-05	FALSE	2812.99	3028.92	3091.55	3167.34	2227.54	2528.22	2601.87	2385.71
ENSDARG00000019223	7913.68	0.198723	0.043809	4.53612	5.72987e-06	7.68293e-05	FALSE	7136.7	7213.32	7475.35	7404.52	8081.43	8668.02	8416.78	8387.56
ENSDARG00000031616	224.315	-1.0085	0.222346	-4.53571	5.74105e-06	7.69381e-05	FALSE	311.539	399.772	354.57	309.659	112.53	257.734	156.31	158.055
ENSDARG00000019732	2610.54	-0.252262	0.0556312	-4.53454	5.77283e-06	7.72434e-05	FALSE	2829.21	2995.79	2976.15	2868.6	2479.01	2576.12	2436.67	2312.81
ENSDARG00000102607	1440.67	-0.38574	0.0850633	-4.53475	5.76721e-06	7.72434e-05	FALSE	1607.71	1697	1569.48	1656.95	1088.69	1439.35	1244.97	1227.24
ENSDARG00000026582	286.884	0.745122	0.164322	4.53453	5.77308e-06	7.72434e-05	FALSE	201.586	183.449	239.316	277.834	351.384	398.337	460.852	308.861
ENSDARG00000017049	2044.36	-0.439015	0.0968266	-4.53404	5.78674e-06	7.73849e-05	FALSE	2360.48	2549.53	2349.01	2441.33	1612.04	2199.38	1609.79	1735.74
ENSDARG00000041724	118.155	-0.920301	0.203077	-4.53177	5.84911e-06	7.81773e-05	FALSE	191.286	151.182	177.757	154.38	63.121	75.9967	104.528	110.573
ENSDARG00000017985	385.779	-0.584993	0.129118	-4.5307	5.87896e-06	7.85345e-05	FALSE	513.684	524.352	521.462	489.317	296.71	333.607	385.996	347.197
ENSDARG00000013072	214.41	-0.667298	0.147301	-4.53017	5.89363e-06	7.86811e-05	FALSE	275.343	315.504	262.162	214.676	179.549	154.939	178.493	158.298
ENSDARG00000025311	92.9969	1.41738	0.312882	4.53008	5.89622e-06	7.86811e-05	FALSE	55.7123	45.7231	52.1367	73.6406	138.364	196.905	177.833	95.6489
ENSDARG00000020777	1414.45	0.433047	0.0956126	4.52918	5.92128e-06	7.89735e-05	FALSE	1174.94	1318.81	1263.38	1243.6	1934.55	1662.68	1742.54	1419.02
ENSDARG00000077915	88.8628	0.891847	0.196928	4.52879	5.93229e-06	7.90782e-05	FALSE	43.7571	57.9686	64.5727	75.9228	110.933	107.297	120.585	116.726
ENSDARG00000076623	1453.88	-0.831986	0.183758	-4.52762	5.96523e-06	7.94751e-05	FALSE	1640.6	1592.82	1631.52	1735.17	698.886	804.345	735.758	1463.36
ENSDARG00000078404	186.62	-1.06402	0.235092	-4.52597	6.01189e-06	8.00543e-05	FALSE	255.42	296.204	252.847	203.89	102.583	63.2845	159.417	155.146
ENSDARG00000011956	235.01	-0.838914	0.185405	-4.52478	6.04595e-06	8.0465e-05	FALSE	284.404	252.616	313.802	283.899	103.418	133.933	198.905	196.097
ENSDARG00000027199	1207	0.526833	0.116455	4.5239	6.07094e-06	8.0743e-05	FALSE	1012.28	1004.55	1114	1006.43	1793.29	1324.8	1627.4	1219.38
ENSDARG00000091579	595.167	0.559233	0.12362	4.52382	6.07327e-06	8.0743e-05	FALSE	474.282	499.113	491.233	501.834	922.044	711.742	625.966	642.165
ENSDARG00000006010	584.867	0.470139	0.10395	4.52275	6.10426e-06	8.11119e-05	FALSE	616.287	470.327	509.012	499.855	763.223	675.098	770.903	684.196
ENSDARG00000052746	1748.86	0.595368	0.131796	4.51735	6.26173e-06	8.31603e-05	FALSE	1594.92	1475.06	1495.37	1453.73	2992.79	1836.42	2409.42	1855.3
ENSDARG00000022000	237.254	0.52059	0.115252	4.51697	6.273e-06	8.32659e-05	FALSE	217.203	198.482	197.576	210.28	330.77	273.919	302.56	273.668
ENSDARG00000087616	4097.76	-0.30023	0.0664698	-4.51679	6.2784e-06	8.32935e-05	FALSE	4125.16	4134.96	4294.57	4514.92	3339.04	3588.76	3211.21	3725.28
ENSDARG00000004470	1947.19	-0.360304	0.079796	-4.51531	6.32231e-06	8.38316e-05	FALSE	2053.07	2371.73	2309.56	1959.96	1688.28	1615.42	1654.09	1813.23
ENSDARG00000012656	2162.34	0.421609	0.0933845	4.51477	6.33861e-06	8.38761e-05	FALSE	1920.47	1861.14	1762.99	1781.57	2883.77	2461.82	2350.07	2117.03
ENSDARG00000043716	454.741	0.461527	0.102219	4.51507	6.32962e-06	8.38761e-05	FALSE	369.88	417.929	336.95	363.737	522.117	458.552	531.218	535.308
ENSDARG00000003977	178.566	-0.904582	0.200361	-4.51475	6.33904e-06	8.38761e-05	FALSE	281.059	260.816	289.449	293.948	105.937	224.414	144.082	127.588
ENSDARG00000088040	183.234	1.16426	0.257872	4.51486	6.33577e-06	8.38761e-05	FALSE	128.14	115.394	129.277	145.854	453.534	306.423	256.28	149.111
ENSDARG00000086336	354.275	0.620719	0.137539	4.51304	6.39048e-06	8.44676e-05	FALSE	266.29	269.877	327.967	303.201	493.73	370.804	531.379	403.872
ENSDARG00000073799	16.2119	2.19305	0.485929	4.51312	6.38812e-06	8.44676e-05	FALSE	2.77411	4.04734	11.6407	7.1794	32.6448	30.8866	33.788	21.1365
ENSDARG00000102472	1148.54	-0.661384	0.14656	-4.51271	6.40049e-06	8.45552e-05	FALSE	1246.24	1321.78	1235.97	1506.67	672.176	1113.81	650.231	922.164
ENSDARG00000098557	139.717	0.840006	0.186163	4.51221	6.41559e-06	8.47101e-05	FALSE	78.6415	95.5235	98.1255	127.142	199.128	202.244	173.984	147.096
ENSDARG00000087921	684.622	0.89997	0.199465	4.51192	6.42447e-06	8.47827e-05	FALSE	490.368	637.656	490.376	525.351	1444.68	833.071	1116.17	609.589
ENSDARG00000086756	632.951	-0.581839	0.129017	-4.50978	6.48959e-06	8.5597e-05	FALSE	709.4	687.101	675.26	671.875	402.819	595.725	380.183	453.659
ENSDARG00000076699	93.7796	-1.17998	0.261659	-4.50962	6.49439e-06	8.56153e-05	FALSE	145.531	151.635	197.422	102.424	43.5195	76.6525	69.3567	74.0843
ENSDARG00000104681	36.2927	2.43303	0.539543	4.50944	6.49992e-06	8.56432e-05	FALSE	5.27778	9.20769	28.5251	8.57586	42.4749	38.7164	124.127	26.6834
ENSDARG00000005883	1016.51	0.411189	0.091187	4.5093	6.50425e-06	8.56553e-05	FALSE	885.69	768.856	943.375	871.921	1309.33	1133.52	1032.38	1138.8
ENSDARG00000056206	4713.5	0.239531	0.0531312	4.5083	6.53496e-06	8.59703e-05	FALSE	4278.42	4402.56	4377.45	4473.79	5489.79	5299.82	5066.76	4853.2
ENSDARG00000034270	10347.1	-0.436921	0.0969149	-4.5083	6.53503e-06	8.59703e-05	FALSE	12455.4	12675.6	11826.6	12578.1	8651.08	10765.6	9237.97	7941.51
ENSDARG00000079185	3.45631	-5.64913	1.25336	-4.50719	6.5691e-06	8.63732e-05	FALSE	8.52827	8.29967	9.03626	7.30483	0	0	0	0
ENSDARG00000016753	1021.6	-0.45583	0.10115	-4.50645	6.59199e-06	8.66287e-05	FALSE	1104.25	1188.67	1059.04	1145.54	914.668	820.419	654.287	890.235
ENSDARG00000103814	37.5474	2.15561	0.478514	4.5048	6.6435e-06	8.72598e-05	FALSE	2.9496	18.1656	2.01251	14.6441	62.3531	37.4108	29.7314	43.666
ENSDARG00000100664	1490.49	-0.379369	0.0842193	-4.50454	6.6516e-06	8.73206e-05	FALSE	1744.63	1582.35	1819.55	1575.07	1172.54	1228.67	1317.56	1442.16
ENSDARG00000077840	3841.77	0.36741	0.0815827	4.50352	6.68356e-06	8.76942e-05	FALSE	3549.11	3360.84	3424.99	3434.36	5208.62	4012.32	4092.54	4447.97
ENSDARG00000099387	369.12	0.490948	0.109018	4.50335	6.68901e-06	8.77199e-05	FALSE	291.211	287.081	296.948	343.217	468.312	430.947	369.107	448.161
ENSDARG00000077479	13.937	-2.96641	0.65879	-4.50281	6.70611e-06	8.78981e-05	FALSE	17.7276	24.0037	17.1191	68.2899	4.02134	4.92015	6.09527	1.53556
ENSDARG00000063924	115935	0.375759	0.0834524	4.50268	6.71017e-06	8.79053e-05	FALSE	102210	100773	105001	108754	149313	129683	147617	114123
ENSDARG00000100985	113.315	-0.768966	0.17081	-4.50187	6.73594e-06	8.81968e-05	FALSE	129.399	140.695	135.013	143.163	66.6351	74.4128	83.4138	96.2182
ENSDARG00000004539	546.924	1.04808	0.23282	4.50169	6.7415e-06	8.82085e-05	FALSE	398.753	409.992	475.97	397.124	1420.39	639.476	917.632	502.727
ENSDARG00000095179	8.4075	-3.37491	0.749711	-4.50162	6.74386e-06	8.82085e-05	FALSE	16.2025	16.0062	28.149	23.783	2.96555	0.933066	4.49596	0
ENSDARG00000079908	1064.34	0.36723	0.0815801	4.50147	6.74863e-06	8.82248e-05	FALSE	905.288	849.4	1004.09	1013.59	1209.49	1234.01	1183.52	1244.84
ENSDARG00000062467	72.1134	-0.969348	0.215393	-4.50037	6.7836e-06	8.86358e-05	FALSE	97.4014	117.904	130.629	87.6585	50.7362	64.4287	53.7418	52.6478
ENSDARG00000091994	29.8465	-2.45825	0.546377	-4.49919	6.82135e-06	8.90826e-05	FALSE	93.1093	61.4383	51.8012	51.8279	9.98871	20.474	12.6575	4.16471
ENSDARG00000100515	1535.68	0.728606	0.16195	4.49896	6.82879e-06	8.91332e-05	FALSE	1142.93	1202.24	1251.27	945.04	2002.51	1586.75	2465.4	1470.34
ENSDARG00000090486	280.633	1.134	0.252133	4.49762	6.87185e-06	8.96486e-05	FALSE	187.87	212.511	180.558	211.907	746.496	369.801	392.367	234.147
ENSDARG00000059460	1262.68	0.270163	0.0600714	4.49736	6.88011e-06	8.97098e-05	FALSE	1145.55	1153.54	1180.62	1151.48	1428.63	1414.2	1425.35	1321.65
ENSDARG00000052638	748.718	0.516529	0.114865	4.49685	6.89687e-06	8.98815e-05	FALSE	638.358	634.608	639.353	608.499	838.306	1063.18	972.213	734.026
ENSDARG00000103878	3606.43	-1.64275	0.365492	-4.49462	6.96949e-06	9.07808e-05	FALSE	5667.25	5873.4	6948.55	6926.14	885.704	3673.21	1938.38	1642.29
ENSDARG00000030110	636.498	0.470463	0.104713	4.49289	7.02629e-06	9.14731e-05	FALSE	597.348	508.153	517.825	539.696	828.386	719.904	814.754	631.629
ENSDARG00000042920	700.925	-1.35584	0.3018	-4.4925	7.03906e-06	9.15919e-05	FALSE	1118.88	1316.81	1272.79	1334.31	330.275	600.234	777.105	263.533
ENSDARG00000093232	113.114	0.92108	0.205087	4.49116	7.08359e-06	9.21234e-05	FALSE	67.8137	87.6023	87.3931	69.4214	192.868	133.081	155.999	112.6
ENSDARG00000070138	16.9197	3.07831	0.685471	4.49079	7.09579e-06	9.22342e-05	FALSE	0	6.90374	0	3.47658	36.1797	19.2279	15.9297	18.646
ENSDARG00000075380	1192.09	0.397187	0.0884566	4.49019	7.11585e-06	9.24471e-05	FALSE	959.795	983.371	979.098	993.813	1271.64	1169.02	1519.37	1201.13
ENSDARG00000095557	422.424	0.611636	0.13626	4.48874	7.1647e-06	9.29854e-05	FALSE	328.398	286.809	362.624	346.795	599.99	560.713	387.743	478.923
ENSDARG00000089227	102.854	0.890731	0.198435	4.48877	7.16352e-06	9.29854e-05	FALSE	72.7425	65.4979	69.5425	87.3877	158.811	107.127	168.605	114.939
ENSDARG00000055835	212.204	-0.872657	0.194417	-4.48857	7.17023e-06	9.3009e-05	FALSE	273.902	275.966	319.299	351.789	125.607	210.451	168.717	163.405
ENSDARG00000018073	681.029	-0.378249	0.0842922	-4.48736	7.21121e-06	9.34921e-05	FALSE	746.588	870.821	749.024	734.049	631.119	612.294	553.983	587.767
ENSDARG00000039133	846.745	-0.883926	0.197051	-4.48576	7.26536e-06	9.41455e-05	FALSE	944.806	1047.1	1109.68	1065.36	450.994	331.276	721.798	752.167
ENSDARG00000056978	664.959	-0.355079	0.0791847	-4.48419	7.31906e-06	9.47924e-05	FALSE	697.307	722.238	714.601	762.622	566.757	597.395	537.93	566.39
ENSDARG00000045695	1395.68	0.529174	0.118013	4.48405	7.32393e-06	9.48065e-05	FALSE	1276.04	1220.17	1235.1	1107.07	2209.54	1585.51	1679.5	1507
ENSDARG00000086133	39.5361	1.35685	0.302837	4.48046	7.44836e-06	9.63675e-05	FALSE	27.8093	13.9245	20.7934	19.9262	55.1018	50.5118	42.5169	59.7437
ENSDARG00000070338	384.155	0.633876	0.141518	4.47913	7.49464e-06	9.68663e-05	FALSE	287.443	330.705	311.033	293.066	631.485	417.624	455.614	395.777
ENSDARG00000079150	717.276	0.666053	0.148699	4.4792	7.4925e-06	9.68663e-05	FALSE	609.174	580.361	607.999	629.008	1258.8	867.894	978.705	747.974
ENSDARG00000101310	69.9209	1.30176	0.290753	4.4772	7.5628e-06	9.76969e-05	FALSE	30.8061	46.0152	24.8555	30.8567	64.0461	69.2473	124.739	68.5525
ENSDARG00000004757	40769.4	0.345986	0.0772896	4.47648	7.58826e-06	9.79328e-05	FALSE	38878.5	37604.8	36231.4	36118	52151.8	43837.3	51338.5	41840.3
ENSDARG00000041115	155.749	-1.2584	0.281115	-4.47647	7.58888e-06	9.79328e-05	FALSE	259.56	291.698	253.514	222.323	188.012	58.0058	71.1892	112.517
ENSDARG00000018961	6428.7	0.389129	0.0869539	4.47512	7.6369e-06	9.85019e-05	FALSE	5672.83	5619.91	5996.41	6093.95	7319.95	7280.25	9129.93	6897.5
ENSDARG00000104208	243.896	0.525087	0.117341	4.47489	7.64493e-06	9.85547e-05	FALSE	213.307	180.08	177.65	194.422	269.307	263.075	286.036	278.302
ENSDARG00000043328	46.7802	1.51111	0.337726	4.47437	7.66367e-06	9.87456e-05	FALSE	25.4249	22.8737	23.8097	37.6031	104.693	61.4826	106.21	44.0921
ENSDARG00000038207	1733.63	-0.474019	0.105945	-4.47419	7.6701e-06	9.87777e-05	FALSE	1907.61	2074.98	1995.9	2096.07	1255.33	1771.59	1440.63	1348.71
ENSDARG00000038643	328.725	-1.04442	0.233565	-4.47165	7.76175e-06	9.99066e-05	FALSE	355.637	492.479	440.255	385.315	117.771	289.383	145.852	257.959
ENSDARG00000003068	1515.83	-0.356189	0.0796579	-4.47148	7.76788e-06	9.99343e-05	FALSE	1590.91	1699.5	1770.54	1655.86	1134.1	1395.81	1301.56	1416.77
ENSDARG00000036776	347.273	-0.568289	0.127164	-4.46896	7.86025e-06	0.000101071	FALSE	533.271	466.277	511.24	415.07	265.376	333.863	373.837	322.44
ENSDARG00000076262	2170.72	0.314651	0.0704154	4.4685	7.87708e-06	0.000101183	FALSE	2048.77	1889.11	1867.85	1888.86	2452.11	2418	2141.37	2549
ENSDARG00000001968	128.587	-0.853742	0.191054	-4.4686	7.87331e-06	0.000101183	FALSE	183.226	210.491	164.414	146.787	82.3227	85.0125	90.6619	129.271
ENSDARG00000017244	2202.05	-0.260837	0.0583893	-4.46721	7.92478e-06	0.000101744	FALSE	2266.45	2324.78	2370.94	2456.3	1856.69	1981.69	1926.38	2097.29
ENSDARG00000044619	3364.91	0.364864	0.0816933	4.46626	7.95986e-06	0.000102142	FALSE	3066.9	3022.44	2899.86	3194.41	4567.97	3597.75	3907.71	3619.54
ENSDARG00000071021	1454.89	-0.665601	0.149089	-4.46445	8.02745e-06	0.000102957	FALSE	2046.95	2327.61	2281.09	1890.67	1372.66	1121.04	1856.48	1039.02
ENSDARG00000087398	49.7792	-1.55723	0.348838	-4.46405	8.04266e-06	0.000103099	FALSE	54.4413	82.299	74.9947	44.6023	13.8217	29.2148	27.9893	16.3416
ENSDARG00000038991	624.87	-0.412678	0.0924513	-4.46374	8.05417e-06	0.000103194	FALSE	716.813	753.728	683.004	701.743	553.911	464.816	602.145	523.142
ENSDARG00000036044	32435	0.326826	0.0732369	4.46258	8.09776e-06	0.000103699	FALSE	31352.1	29293	30285.9	30150.5	43363.7	34596.2	38838.4	35068.7
ENSDARG00000076146	119.247	1.2387	0.277603	4.46215	8.11429e-06	0.000103858	FALSE	69.2238	73.2743	97.2187	87.5027	218.791	107.977	271.74	175.922
ENSDARG00000010078	803.465	-0.424729	0.0952034	-4.46128	8.14728e-06	0.000104218	FALSE	959.256	865.246	852.955	927.468	726.651	723.028	559.196	675.759
ENSDARG00000035544	547.419	-1.49849	0.335896	-4.46119	8.15074e-06	0.000104218	FALSE	805.687	938.289	1064.02	909.826	151.271	570.362	316.012	278.57
ENSDARG00000103226	513.538	-0.558749	0.12525	-4.46106	8.15549e-06	0.000104226	FALSE	619.573	813.635	661.908	729.028	421.412	547.004	533.133	419.057
ENSDARG00000074533	765.096	0.440239	0.0986991	4.46042	8.18001e-06	0.000104486	FALSE	664.192	684.922	661.135	618.67	1021.84	950.708	782.049	814.044
ENSDARG00000098497	467.889	0.477763	0.107131	4.45961	8.21073e-06	0.000104771	FALSE	381.642	379.324	424.037	416.281	657.879	533.83	526.661	517.276
ENSDARG00000042188	471.904	-0.641972	0.143952	-4.45962	8.21058e-06	0.000104771	FALSE	550.484	545.178	578.695	599.877	265.78	438.483	354.594	396.255
ENSDARG00000018411	466.632	0.605824	0.135864	4.45906	8.23207e-06	0.00010499	FALSE	344.439	388.754	431.937	429.537	761.453	591.398	598.596	483.919
ENSDARG00000007377	1530.45	1.39351	0.312548	4.45856	8.25127e-06	0.000105182	FALSE	1143.63	927.043	860.394	974.644	4407.51	1947.5	2547.45	1357.56
ENSDARG00000015278	261.195	0.615924	0.13823	4.45581	8.35788e-06	0.000106445	FALSE	229.854	203.504	217.801	163.329	287.145	338.869	344.33	272.558
ENSDARG00000036135	275.3	-1.01406	0.227583	-4.45578	8.35885e-06	0.000106445	FALSE	377.773	469.81	376.869	355.764	102.114	276.467	230.045	173.849
ENSDARG00000033609	1912.62	0.449333	0.100856	4.4552	8.38151e-06	0.000106625	FALSE	1676.02	1644.69	1770.86	1798.44	2387.91	2318.75	2732.68	1973.82
ENSDARG00000057626	640.002	0.500634	0.112368	4.45529	8.37789e-06	0.000106625	FALSE	511.935	508.095	559.084	579.652	904.53	656.064	805.656	693.729
ENSDARG00000098600	95.0938	-0.827091	0.185683	-4.45433	8.41559e-06	0.000107004	FALSE	118.383	119.868	120.264	155.152	77.2846	85.145	63.6982	65.2973
ENSDARG00000062618	647.04	0.590766	0.132647	4.45368	8.44096e-06	0.000107273	FALSE	549.312	492.543	531.342	615.246	691.77	888.933	1029.23	688.606
ENSDARG00000102145	233.968	0.718736	0.161436	4.45213	8.50234e-06	0.000107998	FALSE	179.464	157.964	136.505	153.874	214.099	270.131	217.963	323.878
ENSDARG00000029533	29636.2	0.321239	0.072179	4.45059	8.56342e-06	0.000108609	FALSE	27415.8	27325.7	27133.7	27573.8	37409.1	31638.3	36970.3	30732.7
ENSDARG00000099517	10095.4	-0.652675	0.146647	-4.45066	8.5608e-06	0.000108609	FALSE	12451.5	12874.1	11309.6	12156.6	5508.96	10550.3	7449.79	7529.1
ENSDARG00000022183	255.061	-0.805573	0.180999	-4.45071	8.55861e-06	0.000108609	FALSE	327.617	318.216	376.753	396.455	140.643	251.989	233.449	186.834
ENSDARG00000037790	3702.25	-0.328163	0.0737418	-4.45017	8.58024e-06	0.000108767	FALSE	3932.42	4258.57	4048.94	4081.99	2939.71	3487.35	3337.23	3238.12
ENSDARG00000013056	786.163	-0.603304	0.135605	-4.44898	8.62807e-06	0.000109318	FALSE	929.034	1073.74	1174.7	1167.43	614.614	855.48	791.597	602.528
ENSDARG00000091956	111.872	1.29966	0.292153	4.44857	8.64437e-06	0.000109469	FALSE	45.277	57.8902	57.2102	33.4493	54.0475	134.974	119.496	166.883
ENSDARG00000059956	250.753	-0.774891	0.174227	-4.4476	8.68354e-06	0.00010991	FALSE	304.743	308.958	394.345	341.217	145.286	251.683	209.238	183.65
ENSDARG00000101275	128.51	0.966856	0.217429	4.44676	8.71734e-06	0.000110282	FALSE	66.1654	102.995	92.309	76.054	137.819	161.53	210.687	151.927
ENSDARG00000074985	903.614	-0.349128	0.0785332	-4.44561	8.76414e-06	0.000110818	FALSE	1030.84	1032.94	1092.79	1045.79	905.66	837.848	791.354	768.801
ENSDARG00000059323	3196.04	-0.32766	0.073708	-4.44538	8.77371e-06	0.000110883	FALSE	3582.26	3940.77	3575.75	3361.76	3167.2	2693.14	2772.26	2889.11
ENSDARG00000034268	2644.29	0.470893	0.105982	4.44315	8.86534e-06	0.000111985	FALSE	2358.22	2278.99	2393.23	2275.69	3897.39	2814.38	3435.74	2752.54
ENSDARG00000042845	134.893	0.755422	0.170036	4.44273	8.88241e-06	0.000112144	FALSE	112.125	87.6399	112.782	90.7132	164.361	194.37	163.001	156.851
ENSDARG00000103034	509.947	-0.91814	0.206684	-4.44224	8.90268e-06	0.000112343	FALSE	713.503	913.586	846.298	647.536	632.884	268.961	396.706	354.409
ENSDARG00000018492	1831.53	0.403494	0.09084	4.44181	8.92065e-06	0.0001124	FALSE	1663.19	1639.39	1515.6	1596.44	2453.71	1869.57	2107.99	2051.48
ENSDARG00000102719	80.0894	0.955185	0.215042	4.44186	8.91854e-06	0.0001124	FALSE	36.3975	65.4789	50.9986	44.1726	104.94	109.857	79.7505	90.8351
ENSDARG00000100865	119.074	-1.54035	0.346775	-4.44192	8.91598e-06	0.0001124	FALSE	154.314	220.058	224.561	161.355	33.344	85.7783	37.1574	104.355
ENSDARG00000078976	799.482	0.443868	0.0999467	4.44105	8.95202e-06	0.000112739	FALSE	720.742	639.943	722.874	649.128	1038.31	801.857	864.013	1008.51
ENSDARG00000044629	140.895	-1.48563	0.334562	-4.44054	8.9733e-06	0.00011295	FALSE	110.608	169.89	177.053	198.529	23.7484	72.0413	36.9467	100.674
ENSDARG00000092534	159.886	-0.673638	0.151715	-4.44017	8.98898e-06	0.000113091	FALSE	192.536	227.777	241.718	199.868	104.328	150.09	155.264	131.303
ENSDARG00000098422	41.4165	1.59475	0.359204	4.43967	9.00972e-06	0.000113295	FALSE	32.1039	10.7242	26.5902	13.55	70.7148	53.7049	76.0658	45.6891
ENSDARG00000092467	10637.7	-0.501844	0.113053	-4.43902	9.03714e-06	0.000113583	FALSE	12651.5	13142.7	12449.9	12651.8	7011.23	10816.5	8138.67	9974.76
ENSDARG00000079055	513.323	0.627223	0.141303	4.43884	9.04459e-06	0.000113619	FALSE	398.992	453.35	483.935	341.751	788.966	635.209	667.154	504.171
ENSDARG00000104429	434.988	0.742592	0.167324	4.43805	9.07763e-06	0.000113977	FALSE	355.758	373.332	350.059	370.988	551.678	576.435	843.307	456.525
ENSDARG00000097033	64.7766	1.1433	0.257652	4.43739	9.10558e-06	0.000114271	FALSE	29.4389	61.9821	38.0279	55.5525	126.41	116.75	95.6887	75.7311
ENSDARG00000040401	1059.56	-0.382967	0.0863647	-4.4343	9.23735e-06	0.000115867	FALSE	1225.89	1247.77	1307.95	1233.01	887.178	1046.02	1012.18	902.249
[truncated: 28,344 more rows]
